# Supplementary material for: Absence of Scaffold Protein Tks4 Disrupts Several Signaling Pathways in Colon Cancer Cells
Source: MDPI journal article supplement (doi:10.3390/ijms24021310), 2023-01-09
Supplement: s1 [file s1]

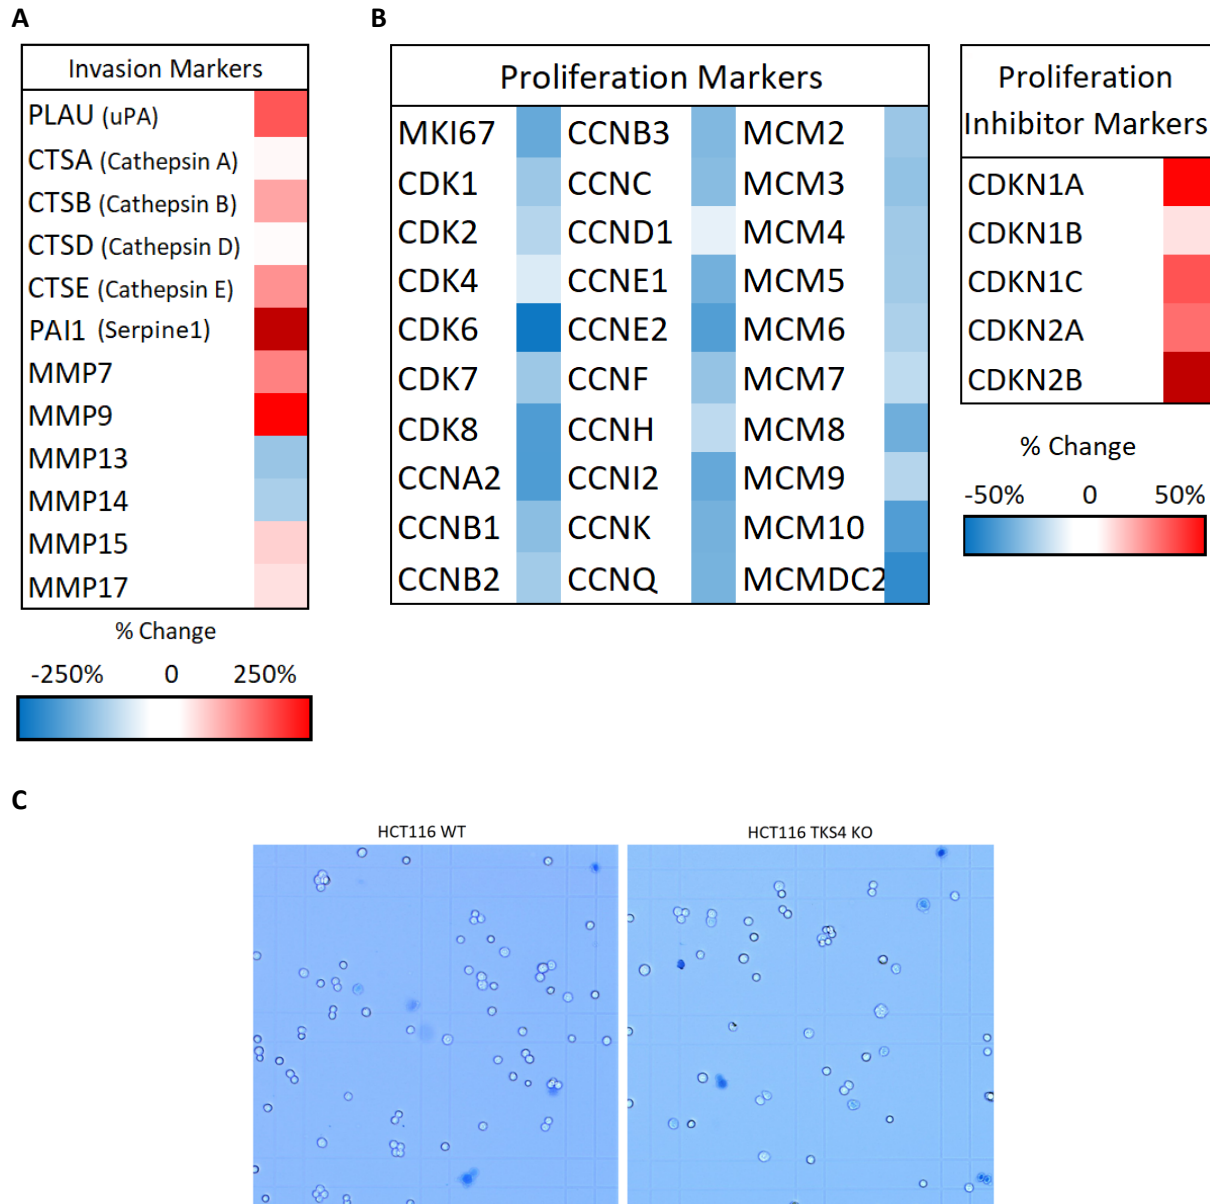

**Figure S1. Proliferation and invasion markers, and viability of the Tks4 KO cells** **A.** Changes in the expression levels of invasion markers based on the NGS data. Red: overexpression; blue: downregulation. Darker colors represent higher differences. **B.** Changes in the expression levels of proliferation markers based on the NGS data. Red: overexpression; blue: downregulation. Darker colors represent higher differences. **C.** Viability Assay of HCT116 WT and Tks4 KO cells under the light microscope stained with Trypan Blue. Viable cells are clear, dead cells are blue.

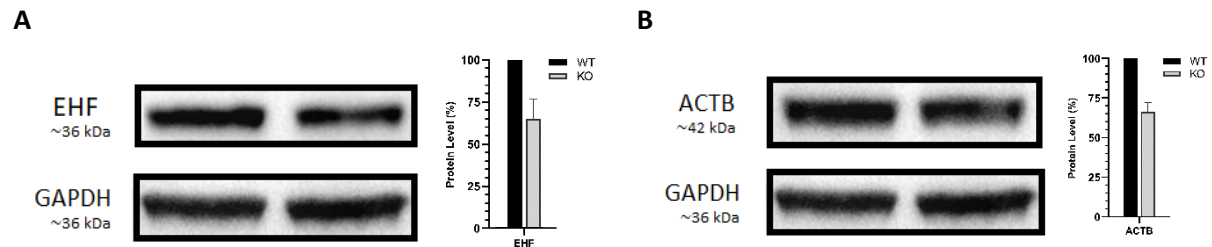

**Figure S2. Protein abundances in WT and Tks4 KO HCT116 cells.** **A.** Abundance of EHF protein in the wild type (left lane) and in the Tks4 KO cells (right lane). The bar graph represents the intensity differences between the bands, normalized to GAPDH expression. **B.** Abundance of ACTB protein in the wild type (left lane) and in the Tks4 KO cells (right lane). The bar graph represents the intensity differences between the bands, normalized to GAPDH expression.

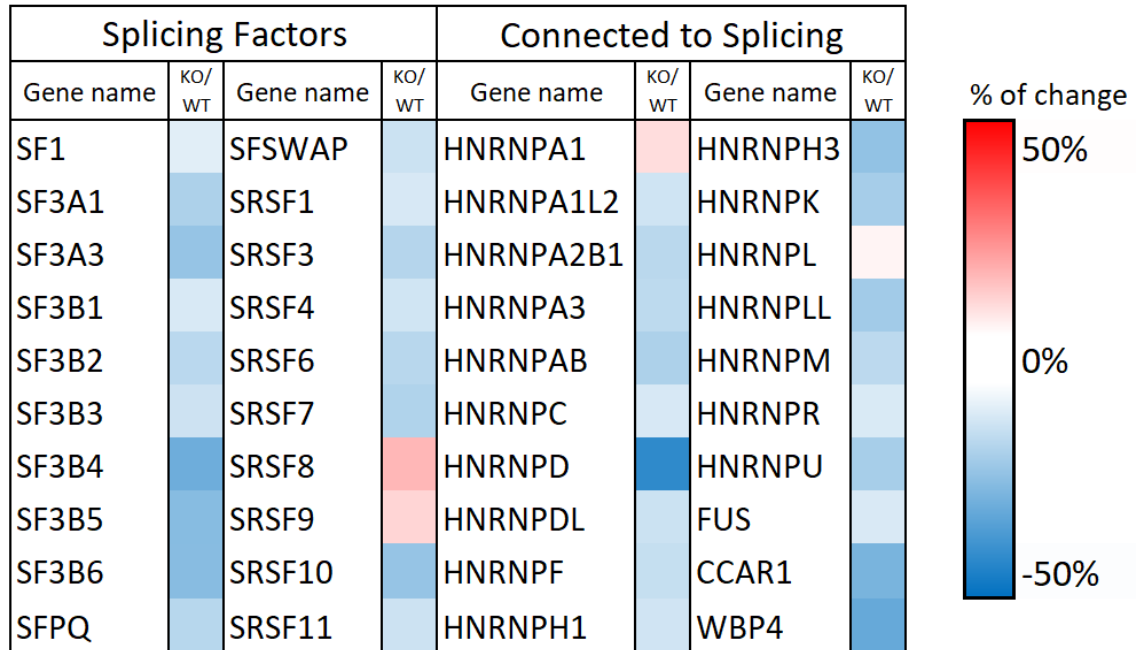

**Figure S3. Changes in the expression levels of mRNA splicing markers based on the NGS data.** Red: overexpression; blue: downregulation. Darker colors represent higher differences.

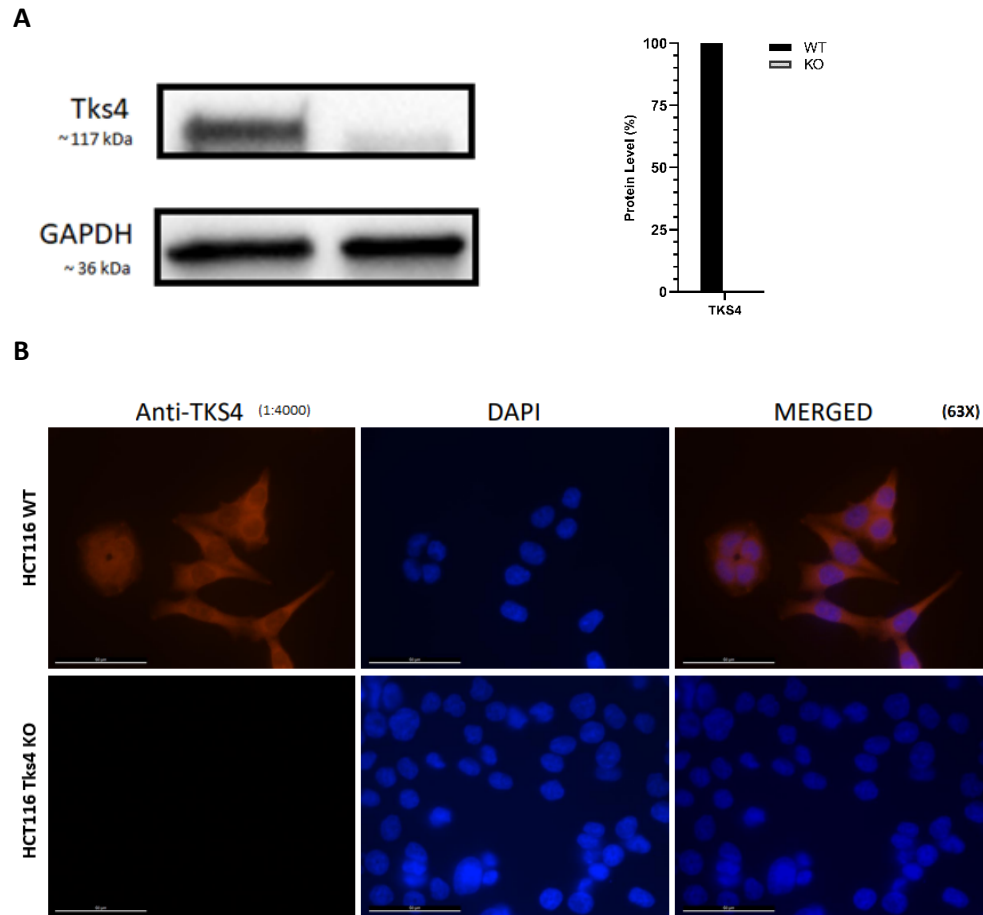

**Figure S4. Tks4 abundances in the WT and KO HCT116 cells.** **A.** Abundance of Tks4 protein in the wild type (left lane) and in the Tks4 KO HCT116 cells (right lane). The bar graph represents the intensity differences between the bands, normalized to GAPDH expression. **B.** Representative images of wild type (upper row) and Tks4 KO HCT116 cells stained with anti-Tks4 antibody.
