# Supplementary material for: Absence of Scaffold Protein Tks4 Disrupts Several Signaling Pathways in Colon Cancer Cells
Source: Int J Mol Sci. 2023 Jan 9;24(2):1310. doi: 10.3390/ijms24021310 (PMC9861885; doi:10.3390/ijms24021310)
Supplement: Supplementary file 1 [file ijms-24-01310-s001.zip › Supplementary Tables_Revised.xlsx]

## Sheet: Supplementary Table S1
Markers	gene	Description	locus	sample_1	sample_2	value_WT	value_KO	FC (KO/WT)	log2(fold_change)	%	test_stat	p_value	-log10(p_value)	q_value	chain	ENSG_id
Proliferation	MKI67	Marker Of Proliferation Ki-67	chr10:128096658-128126423	TKS4_WT	TKS4_KO	667876	468142	0.700942	-0.512633975795805	-29.9058	-0.480785	0.44395	0.352666	0.9999	-	ENSG00000148773.14
Proliferation	CCNA2	Cyclin A2	chr4:121801322-121823883	TKS4_WT	TKS4_KO	218896	143328	0.654777	-0.610924767736189	-34.5223	-0.450737	0.46285	0.33456	0.9999	-	ENSG00000145386.11
Proliferation	CCNB1	Cyclin B1	chr5:69167149-69178245	TKS4_WT	TKS4_KO	303237	234510	0.773356	-0.370796214205622	-22.6644	-0.328831	0.60005	0.221813	0.9999	+	ENSG00000134057.15
Proliferation	CCNB2	Cyclin B2	chr15:59105145-59125045	TKS4_WT	TKS4_KO	73336.7	60038.9	0.818675	-0.288637368572986	-18.1325	-0.324438	0.6064	0.217241	0.9999	+	ENSG00000157456.8
Proliferation	CCNB3	Cyclin B3	chrX:50202712-50351914	TKS4_WT	TKS4_KO	3558.06	2685.87	0.754876	-0.405688194641514	-24.5124	-0.355071	0.56345	0.249145	0.9999	+	ENSG00000147082.18
Proliferation	CCNC	Cyclin C	chr6:99398049-99579288	TKS4_WT	TKS4_KO	121504	93361.2	0.76838	-0.380108441586761	-23.162	-0.258771	0.7026	0.153292	0.9999	-	ENSG00000112237.13
Proliferation	CCND1	Cyclin D1	chr11:69641155-69654474	TKS4_WT	TKS4_KO	680200	648246	0.953023	-0.0694175966301648	-4.69774	-0.06422	0.91885	0.0367554	0.9999	+	ENSG00000110092.4
Proliferation	CCND3	Cyclin D3	chr6:41934932-42048894	TKS4_WT	TKS4_KO	23058.2	22615.3	0.980792	-0.0279806393069108	-1.92078	-0.031683	0.96315	0.0163061	0.9999	-	ENSG00000112576.13
Proliferation	CCNE1	Cyclin E1	chr19:29811990-29824312	TKS4_WT	TKS4_KO	44794.9	32511.3	0.725782	-0.462392025787814	-27.4218	-0.459214	0.47755	0.320981	0.9999	+	ENSG00000105173.14
Proliferation	CCNE2	Cyclin E2	chr8:94823286-95118496	TKS4_WT	TKS4_KO	40290.3	26676.6	0.662111	-0.594855917326589	-33.7889	-0.234161	0.7351	0.133654	0.9999	-	ENSG00000175305.18
Proliferation	CCNF	Cyclin F	chr16:2429446-2459979	TKS4_WT	TKS4_KO	121427	96366.6	0.793618	-0.333483829894013	-20.6382	-0.383864	0.5454	0.263285	0.9999	+	ENSG00000162063.13
Proliferation	CCNH	Cyclin H	chr5:87267844-87412971	TKS4_WT	TKS4_KO	63665.2	55635.9	0.873883	-0.194488563490585	-12.6117	-0.176237	0.81335	0.0897225	0.9999	-	ENSG00000134480.16
Proliferation	CCNI2	Cyclin I Family Member 2	chr5:132747425-132778216	TKS4_WT	TKS4_KO	321.88	225.007	0.699133	-0.516360157168562	-30.0867	0	1	0	1	+	ENSG00000205089.8
Proliferation	CCNJ	Cyclin J	chr10:95710900-96090235	TKS4_WT	TKS4_KO	28336.1	23477	0.82852	-0.27139208884977	-17.148	-0.312264	0.6656	0.176787	0.9999	+	ENSG00000107443.16
Proliferation	CCNK	Cyclin K	chr14:99397745-99604207	TKS4_WT	TKS4_KO	66538.6	48571.3	0.729972	-0.454086609290194	-27.0028	-0.279319	0.7463	0.127087	0.9999	+	ENSG00000090061.17
Proliferation	CCNQ	Cyclin Q	chrX:153587924-153599165	TKS4_WT	TKS4_KO	23682.3	17406.4	0.734997	-0.444189149411567	-26.5003	-0.482149	0.51565	0.287645	0.9999	-	ENSG00000262919.8
Proliferation	CDK1	Cyclin Dependent Kinase 1	chr10:60778330-60794852	TKS4_WT	TKS4_KO	189907	153250	0.806974	-0.30940582878865	-19.3026	-0.297084	0.63035	0.200418	0.9999	+	ENSG00000170312.17
Proliferation	CDK2	Cyclin Dependent Kinase 2	chr12:55966829-55972789	TKS4_WT	TKS4_KO	117494	100497	0.855337	-0.225434442465623	-14.4663	-0.263254	0.67745	0.169123	0.9999	+	ENSG00000123374.11
Proliferation	CDK4	Cyclin Dependent Kinase 4	chr12:57745038-57752310	TKS4_WT	TKS4_KO	173214	161257	0.93097	-0.103193690867676	-6.90302	-0.112013	0.8608	0.0650977	0.9999	-	ENSG00000135446.17
Proliferation	CDK6	Cyclin Dependent Kinase 6	chr7:92604920-92917187	TKS4_WT	TKS4_KO	416658	220104	0.528261	-0.92067800758566	-47.1739	-0.788404	0.22415	0.649461	0.9999	-	ENSG00000105810.10
Proliferation	CDK7	Cyclin Dependent Kinase 7	chr5:69234794-69333070	TKS4_WT	TKS4_KO	79253.3	64033.8	0.807964	-0.307636948401482	-19.2036	-0.291115	0.65295	0.18512	0.9999	+	ENSG00000134058.12
Proliferation	CDK8	Cyclin Dependent Kinase 8	chr13:26254124-26405238	TKS4_WT	TKS4_KO	35599.9	23325.6	0.655216	-0.609956864450107	-34.4784	-0.728479	0.25365	0.595765	0.9999	+	ENSG00000132964.12
Proliferation	CCDC25	Coiled-Coil Domain Containing 25	chr8:27633664-27837817	TKS4_WT	TKS4_KO	47470.9	43932.3	0.925458	-0.111761126042625	-7.45424	-0.0466579	0.94225	0.0258339	0.9999	-	ENSG00000147419.19
Proliferation	CDC25C	Cell Division Cycle 25C	chr5:138285264-138349729	TKS4_WT	TKS4_KO	24409.2	16028.9	0.656676	-0.606746499694882	-34.3324	-0.315615	0.51755	0.286048	0.9999	-	ENSG00000158402.21
Proliferation	MCM10	Minichromosome Maintenance 10 Replication Initiation Factor	chr10:13161557-13211110	TKS4_WT	TKS4_KO	111502	73528.5	0.659437	-0.600693460641342	-34.0563	-0.618467	0.3605	0.443095	0.9999	+	ENSG00000065328.17
Proliferation	MCM2	Minichromosome Maintenance Complex Component 2	chr3:127598410-127628996	TKS4_WT	TKS4_KO	232238	186745	0.804111	-0.314534285391882	-19.5889	-0.355641	0.57725	0.238636	0.9999	+	ENSG00000073111.14
Proliferation	MCM3	Minichromosome Maintenance Complex Component 3	chr6:52264014-52284742	TKS4_WT	TKS4_KO	333301	262222	0.786742	-0.34603679822067	-21.3258	-0.349306	0.5997	0.222066	0.9999	-	ENSG00000112118.20
Proliferation	MCM4	Minichromosome Maintenance Complex Component 4	chr8:47960940-47978160	TKS4_WT	TKS4_KO	362023	294810	0.814341	-0.296295804788157	-18.5659	-0.287672	0.6659	0.176591	0.9999	+	ENSG00000104738.18
Proliferation	MCM5	Minichromosome Maintenance Complex Component 5	chr22:35400132-35454942	TKS4_WT	TKS4_KO	201208	164432	0.817224	-0.291196419012801	-18.2776	-0.321364	0.61265	0.212788	0.9999	+	ENSG00000100297.16
Proliferation	MCM6	Minichromosome Maintenance Complex Component 6	chr2:135839625-135876443	TKS4_WT	TKS4_KO	188573	157945	0.83758	-0.255700709462003	-16.242	-0.274972	0.66575	0.176689	0.9999	-	ENSG00000076003.5
Proliferation	MCM7	Minichromosome Maintenance Complex Component 7	chr7:100092727-100101397	TKS4_WT	TKS4_KO	508159	444306	0.874344	-0.193726313801441	-12.5656	-0.174004	0.7878	0.103584	0.9999	-	ENSG00000166508.18
Proliferation	MCM8	Minichromosome Maintenance Complex Component 8	chr20:5950651-6005821	TKS4_WT	TKS4_KO	82007.2	58965.9	0.719034	-0.475869007812137	-28.0966	-0.588548	0.3932	0.405386	0.9999	+	ENSG00000125885.13
Proliferation	MCM9	Minichromosome Maintenance Complex Component 9	chr6:118813448-118935159	TKS4_WT	TKS4_KO	28274.1	24190.8	0.855582	-0.225021760232436	-14.4418	-0.185069	0.78365	0.105878	0.9999	-	ENSG00000111877.18
Proliferation	MCMDC2	Minichromosome Maintenance Domain Containing 2	chr8:66870756-66926436	TKS4_WT	TKS4_KO	252.025	150.464	0.59718	-0.743762317394621	-40.282	-0.072132	0.6445	0.190777	0.9999	+	ENSG00000178460.18
Proliferation Inhibitor	CDKN1A	Cyclin Dependent Kinase Inhibitor 1A	chr6:36676462-36687332	TKS4_WT	TKS4_KO	196292	293766	1.49658	0.58166581041631	49.6576	0.644338	0.30515	0.515487	0.9999	+	ENSG00000124762.14
Proliferation Inhibitor	CDKN1B	Cyclin Dependent Kinase Inhibitor 1B	chr12:12659690-12724041	TKS4_WT	TKS4_KO	38142.8	41196.4	1.08006	0.111107237410338	8.00568	0.133275	0.8208	0.0857627	0.9999	+	ENSG00000111276.12
Proliferation Inhibitor	CDKN1C	Cyclin Dependent Kinase Inhibitor 1C	chr11:2883217-2885775	TKS4_WT	TKS4_KO	10366.3	13784.5	1.32974	0.411142435959227	32.9738	0.437665	0.5052	0.296537	0.9999	-	ENSG00000129757.15
Proliferation Inhibitor	CDKN2A	Cyclin Dependent Kinase Inhibitor 2A	chr9:21967138-22121097	TKS4_WT	TKS4_KO	24380.4	44974.7	1.8447	0.883389152590453	84.4704	0.844127	0.1747	0.757707	0.9999	-	ENSG00000147889.18
Proliferation Inhibitor	CDKN2B	Cyclin Dependent Kinase Inhibitor 2B	chr9:21967138-22121097	TKS4_WT	TKS4_KO	6239.94	24324.8	3.8982	1.96280669186368	289.82	1.07995	0.2693	0.569764	0.9999	-	ENSG00000147883.12
Invasion	PLAU	Plasminogen Activator, Urokinase	chr10:73909181-73922777	TKS4_WT	TKS4_KO	38740	106080	2.73825	1.45325445747512	173.825	1.53036	0.0231	1.63639	0.9999	+	ENSG00000122861.16
Invasion	CTSA	Cathepsin A	chr20:45886490-45912155	TKS4_WT	TKS4_KO	50158.3	53807.4	1.07275	0.10131594953641	7.27515	0.117903	0.8532	0.0689492	0.9999	+	ENSG00000064601.21
Invasion	CTSB	Cathepsin B	chr8:11842523-11868087	TKS4_WT	TKS4_KO	130388	252155	1.93388	0.951499198455537	93.3881	0.977315	0.11655	0.933488	0.9999	-	ENSG00000164733.22
Invasion	CTSD	Cathepsin D	chr11:1752754-1763927	TKS4_WT	TKS4_KO	69954.5	73410.3	1.0494	0.069565535432847	4.94006	0.0783435	0.8956	0.0478859	0.9999	-	ENSG00000117984.15
Invasion	CTSE	Cathepsin E	chr1:206009263-206023899	TKS4_WT	TKS4_KO	59.6677	127.366	2.13269	1.09267454641534	113.269	0.240189	0.33185	0.479058	0.9999	-	ENSG00000196188.12
Invasion	SERPINE1	Serpin Family E Member 1	chr7:101127103-101139247	TKS4_WT	TKS4_KO	12813.6	78919.8	6.15903	2.62270200901573	515.903	2.6679	0.0004	3.39794	0.0955544	+	ENSG00000106366.9
Invasion	MMP7	Matrix Metallopeptidase 7	chr11:102520507-102530747	TKS4_WT	TKS4_KO	284.213	653.319	2.29824	1.20052833913349	129.824	0.733515	0.23525	0.62847	0.9999	-	ENSG00000137673.9
Invasion	MMP9	Matrix Metallopeptidase 9	chr20:46008907-46060150	TKS4_WT	TKS4_KO	151.523	547.36	3.61067	1.85226494304356	261.067	0.776449	0.34775	0.458733	0.9999	+	ENSG00000100985.7
Invasion	MMP13	Matrix Metallopeptidase 13	chr11:102942994-102955732	TKS4_WT	TKS4_KO	201.774	0	0.000495358	-10.979239397974	-99.9505	-nan	0.00075	3.12494	0.155538	-	ENSG00000137745.13
Invasion	MMP14	Matrix Metallopeptidase 14	chr14:22836584-22847758	TKS4_WT	TKS4_KO	12754.8	2149.43	0.168526	-2.56895843747199	-83.1474	-4.10527	0.0067	2.17393	0.831858	+	ENSG00000157227.14
Invasion	MMP15	Matrix Metallopeptidase 15	chr16:58025753-58046901	TKS4_WT	TKS4_KO	50390.6	74714.1	1.4827	0.568224966625496	48.2698	0.673722	0.2861	0.543482	0.9999	+	ENSG00000102996.5
Invasion	MMP17	Matrix Metallopeptidase 17	chr12:131828392-131851771	TKS4_WT	TKS4_KO	7178.1	9505.19	1.32419	0.405108522917416	32.4189	0.423485	0.52625	0.278808	0.9999	+	ENSG00000198598.7
Senescence Promoting	TP53	Tumor Protein P53	chr17:7668401-7703502	TKS4_WT	TKS4_KO	68963.9	86545.3	1.25494	0.327613685514302	25.4936	0.340011	0.59575	0.224936	0.9999	-	ENSG00000141510.18
Senescence Promoting	CDKN2A	p16	chr9:21967138-22121097	TKS4_WT	TKS4_KO	24380.4	44974.7	1.8447	0.883389152590453	84.4704	0.844127	0.1747	0.757707	0.9999	-	ENSG00000147889.18
Senescence Promoting	CDKN2B	p15	chr9:21967138-22121097	TKS4_WT	TKS4_KO	6239.94	24324.8	3.8982	1.96280669186368	289.82	1.07995	0.2693	0.569764	0.9999	-	ENSG00000147883.12
Senescence Promoting	CDKN1A	p21	chr6:36676462-36687332	TKS4_WT	TKS4_KO	196292	293766	1.49658	0.58166581041631	49.6576	0.644338	0.30515	0.515487	0.9999	+	ENSG00000124762.14
Senescence Promoting	CDKN1B	p27	chr12:12659690-12724041	TKS4_WT	TKS4_KO	38142.8	41196.4	1.08006	0.111107237410338	8.00568	0.133275	0.8208	0.0857627	0.9999	+	ENSG00000111276.12
Senescence Promoting	CDKN1C	p57	chr11:2883217-2885775	TKS4_WT	TKS4_KO	10366.3	13784.5	1.32974	0.411142435959227	32.9738	0.437665	0.5052	0.296537	0.9999	-	ENSG00000129757.15
Senescence Promoting	CDKN2A	p19ARF	chr9:21967138-22121097	TKS4_WT	TKS4_KO	24380.4	44974.7	1.8447	0.883389152590453	84.4704	0.844127	0.1747	0.757707	0.9999	-	ENSG00000147889.18
Senescence Promoting	MAPK14	p38MAPK	chr6:36027710-36122964	TKS4_WT	TKS4_KO	62375.8	73270.5	1.17466	0.232245702959364	17.4662	0.280709	0.6784	0.168514	0.9999	+	ENSG00000112062.11
Senescence Promoting	PDP2	Pyruvate Dehydrogenase Phosphatase Catalytic Subunit 2	chr16:66880514-66891101	TKS4_WT	TKS4_KO	41679.3	45680.6	1.096	0.132250249075907	9.60019	0.158856	0.82635	0.082836	0.9999	+	ENSG00000172840.7
Senescence Promoting	PDHA1	Pyruvate Dehydrogenase E1 Subunit Alpha 1	chrX:19343905-19515508	TKS4_WT	TKS4_KO	52444.9	55659.6	1.0613	0.0858278969764302	6.12966	0.106005	0.86975	0.0606056	0.9999	+	ENSG00000131828.14
Senescence Inhibiting	CDK1	Cyclin Dependent Kinase 1	chr10:60778330-60794852	TKS4_WT	TKS4_KO	189907	153250	0.806974	-0.30940582878865	-19.3026	-0.297084	0.63035	0.200418	0.9999	+	ENSG00000170312.17
Senescence Inhibiting	CDK2	Cyclin Dependent Kinase 2	chr12:55966829-55972789	TKS4_WT	TKS4_KO	117494	100497	0.855337	-0.225434442465623	-14.4663	-0.263254	0.67745	0.169123	0.9999	+	ENSG00000123374.11
Senescence Inhibiting	CDK4	Cyclin Dependent Kinase 4	chr12:57745038-57752310	TKS4_WT	TKS4_KO	173214	161257	0.93097	-0.103193690867676	-6.90302	-0.112013	0.8608	0.0650977	0.9999	-	ENSG00000135446.17
Senescence Inhibiting	CDK6	Cyclin Dependent Kinase 6	chr7:92604920-92917187	TKS4_WT	TKS4_KO	416658	220104	0.528261	-0.92067800758566	-47.1739	-0.788404	0.22415	0.649461	0.9999	-	ENSG00000105810.10
Senescence Inhibiting	CCND1	Cyclin D1	chr11:69641155-69654474	TKS4_WT	TKS4_KO	680200	648246	0.953023	-0.0694175966301648	-4.69774	-0.06422	0.91885	0.0367554	0.9999	+	ENSG00000110092.4
Senescence Inhibiting	CCNE1	Cyclin E1	chr19:29811990-29824312	TKS4_WT	TKS4_KO	44794.9	32511.3	0.725782	-0.462392025787814	-27.4218	-0.459214	0.47755	0.320981	0.9999	+	ENSG00000105173.14
Senescence Inhibiting	CDC25C	Cell Division Cycle 25C	chr5:138285264-138349729	TKS4_WT	TKS4_KO	24409.2	16028.9	0.656676	-0.606746499694882	-34.3324	-0.315615	0.51755	0.286048	0.9999	-	ENSG00000158402.21
Senescence Inhibiting	MCM2	Minichromosome Maintenance Complex Component 2	chr3:127598410-127628996	TKS4_WT	TKS4_KO	232238	186745	0.804111	-0.314534285391882	-19.5889	-0.355641	0.57725	0.238636	0.9999	+	ENSG00000073111.14
Splicing Factor	SF1	Splicing Factor 1	chr11:64764603-64778769	TKS4_WT	TKS4_KO	176963	166733	0.942191	-0.0859080258847812	-5.78087	0.644359	0.9207	0.0358819	0.999775	-	ENSG00000168066.21
Splicing Factor	SF3A1	Splicing Factor 3a Subunit 1	chr22:30331987-30378673	TKS4_WT	TKS4_KO	132715	111410	0.839468	-0.252452498720019	-16.0532	1.64436	0.65695	0.182468	0.999775	-	ENSG00000099995.19
Splicing Factor	SF3A3	Splicing Factor 3a Subunit 3	chr1:37956974-37990022	TKS4_WT	TKS4_KO	131296	104319	0.794533	-0.331820735202293	-20.5467	2.64436	0.7503	0.124765	0.999775	-	ENSG00000183431.12
Splicing Factor	SF3B1	Splicing Factor 3b Subunit 1	chr2:197389783-197435093	TKS4_WT	TKS4_KO	513934	475029	0.9243	-0.113567484670712	-7.57004	3.64436	0.85395	0.0685676	0.999775	-	ENSG00000115524.17
Splicing Factor	SF3B2	Splicing Factor 3b Subunit 2	chr11:66052360-66069308	TKS4_WT	TKS4_KO	167292	144981	0.866634	-0.206504478750088	-13.3366	4.64436	0.70575	0.151349	0.999775	+	ENSG00000087365.16
Splicing Factor	SF3B3	Splicing Factor 3b Subunit 3	chr16:70523815-70577668	TKS4_WT	TKS4_KO	317187	286103	0.902001	-0.148798968110552	-9.79989	5.64436	0.8082	0.0924812	0.999775	+	ENSG00000189091.13
Splicing Factor	SF3B4	Splicing Factor 3b Subunit 4	chr1:149923316-149927803	TKS4_WT	TKS4_KO	49126.2	35204.5	0.716614	-0.480731634499786	-28.3386	6.64436	0.8222	0.0850225	0.999775	-	ENSG00000143368.10
Splicing Factor	SF3B5	Splicing Factor 3b Subunit 5	chr6:144094883-144095573	TKS4_WT	TKS4_KO	9578.12	7341.49	0.766488	-0.383665025262915	-23.3512	7.64436	0.85955	0.0657289	0.999775	-	ENSG00000169976.7
Splicing Factor	SF3B6	Splicing Factor 3b Subunit 6	chr2:24029335-24076326	TKS4_WT	TKS4_KO	101659	78114.6	0.768399	-0.380073391285088	-23.1601	8.64436	0.8143	0.0892156	0.999775	-	ENSG00000115128.7
Splicing Factor	SFPQ	Splicing Factor Proline And Glutamine Rich	chr1:35176377-35193174	TKS4_WT	TKS4_KO	457814	393914	0.860424	-0.216880837883522	-13.9576	9.64436	0.7545	0.122341	0.999775	-	ENSG00000116560.12
Splicing Factor	SFSWAP	Splicing Factor SWAP	chr12:131711087-131799738	TKS4_WT	TKS4_KO	1378.33	1240.37	0.899915	-0.152139160709856	-10.0085	10.6444	0.9303	0.031377	0.999775	+	ENSG00000061936.10
Splicing	SRSF1	Serine And Arginine Rich Splicing Factor 1	chr17:58000918-58007273	TKS4_WT	TKS4_KO	1013870	935020	0.922229	-0.116803538011485	-7.77713	11.6444	0.8821	0.0544822	0.999775	-	ENSG00000136450.13
Splicing	SRSF3	Serine And Arginine Rich Splicing Factor 3	chr6:36594361-36605600	TKS4_WT	TKS4_KO	331166	283631	0.856462	-0.223539266125528	-14.3538	12.6444	0.739	0.131356	0.999775	+	ENSG00000112081.17
Splicing	SRSF4	Serine And Arginine Rich Splicing Factor 4	chr1:29147742-29181900	TKS4_WT	TKS4_KO	62158.4	56545.2	0.909695	-0.136544575712674	-9.03046	13.6444	0.9448	0.0246601	0.999775	-	ENSG00000116350.18
Splicing	SRSF6	Serine And Arginine Rich Splicing Factor 6	chr20:43457892-43464243	TKS4_WT	TKS4_KO	385093	331604	0.861101	-0.215745428895	-13.8899	14.6444	0.7617	0.118216	0.999775	+	ENSG00000124193.16
Splicing	SRSF7	Serine And Arginine Rich Splicing Factor 7	chr2:38743598-38751494	TKS4_WT	TKS4_KO	167573	141828	0.846366	-0.24064717819522	-15.3634	15.6444	0.73625	0.132975	0.999775	-	ENSG00000115875.19
Splicing	SRSF8	Serine And Arginine Rich Splicing Factor 8	chr11:95066876-95071225	TKS4_WT	TKS4_KO	40851.3	46641.9	1.14175	0.191244131178372	14.1748	16.6444	0.72935	0.137064	0.999775	+	ENSG00000263465.5
Splicing	SRSF9	Serine And Arginine Rich Splicing Factor 9	chr12:120446443-120469748	TKS4_WT	TKS4_KO	108277	117347	1.08377	0.116054035675942	8.37666	17.6444	0.9423	0.0258108	0.999775	-	ENSG00000111786.9
Splicing	SRSF10	Serine And Arginine Rich Splicing Factor 10	chr1:23964346-23980370	TKS4_WT	TKS4_KO	232010	184527	0.795341	-0.330354902191759	-20.4659	18.6444	0.6604	0.180193	0.999775	-	ENSG00000188529.15
Splicing	SRSF11	Serine And Arginine Rich Splicing Factor 11	chr1:70205695-70253052	TKS4_WT	TKS4_KO	167793	151066	0.900312	-0.151503441658609	-9.96882	19.6444	0.8383	0.0766005	0.999775	+	ENSG00000116754.14
Splicing	HNRNPA1	Heterogeneous Nuclear Ribonucleoprotein A1	chr12:54280725-54287087	TKS4_WT	TKS4_KO	535203	571045	1.06697	0.0935182188843131	6.6969	20.6444	0.9067	0.0425364	0.999775	+	ENSG00000135486.19
Splicing	HNRNPA1L2	Heterogeneous Nuclear Ribonucleoprotein A1 Like 2	chr13:52617524-52643773	TKS4_WT	TKS4_KO	15596.8	14136.6	0.906379	-0.141813927209916	-9.36212	21.6444	0.88385	0.0536214	0.999775	+	ENSG00000139675.13
Splicing	HNRNPA2B1	Heterogeneous Nuclear Ribonucleoprotein A2/B1	chr7:26189919-26200775	TKS4_WT	TKS4_KO	502920	434892	0.864734	-0.209671712295153	-13.5266	22.6444	0.7506	0.124591	0.999775	-	ENSG00000122566.22
Splicing	HNRNPA3	Heterogeneous Nuclear Ribonucleoprotein A3	chr2:177212693-177223959	TKS4_WT	TKS4_KO	315333	275027	0.87218	-0.197302832638614	-12.782	23.6444	0.80025	0.0967743	0.999775	+	ENSG00000170144.21
Splicing	HNRNPAB	Heterogeneous Nuclear Ribonucleoprotein A/B	chr5:178204532-178232822	TKS4_WT	TKS4_KO	174534	146616	0.840043	-0.251465398465871	-15.9957	24.6444	0.7052	0.151688	0.999775	+	ENSG00000197451.12
Splicing	HNRNPC	Heterogeneous Nuclear Ribonucleoprotein C	chr14:21209135-21269442	TKS4_WT	TKS4_KO	599283	553080	0.922903	-0.115749255604675	-7.70971	25.6444	0.89305	0.0491242	0.999775	-	ENSG00000092199.19
Splicing	HNRNPD	Heterogeneous Nuclear Ribonucleoprotein D	chr4:82352497-82373991	TKS4_WT	TKS4_KO	155748	92438.3	0.593512	-0.752650369872175	-40.6488	26.6444	0.46155	0.335781	0.999775	-	ENSG00000138668.19
Splicing	HNRNPDL	Heterogeneous Nuclear Ribonucleoprotein D like	chr4:82422563-82430462	TKS4_WT	TKS4_KO	234269	210746	0.89959	-0.152660742493507	-10.041	27.6444	0.8865	0.0523213	0.999775	-	ENSG00000152795.18
Splicing	HNRNPF	Heterogeneous Nuclear Ribonucleoprotein F	chr10:43385617-43409186	TKS4_WT	TKS4_KO	279259	248024	0.88815	-0.171123982278908	-11.185	28.6444	0.7889	0.102978	0.999775	-	ENSG00000169813.17
Splicing	HNRNPH1	Heterogeneous Nuclear Ribonucleoprotein H1	chr5:179522456-179653239	TKS4_WT	TKS4_KO	205172	186471	0.908852	-0.137882508260686	-9.11479	29.6444	0.84065	0.0753848	0.999775	-	ENSG00000169045.17
Splicing	HNRNPH3	Heterogeneous Nuclear Ribonucleoprotein H3	chr10:68282659-68407302	TKS4_WT	TKS4_KO	55216.1	43519.9	0.788174	-0.343413047929616	-21.1826	30.6444	0.65905	0.181082	0.999775	+	ENSG00000096746.18
Splicing	HNRNPK	Heterogeneous Nuclear Ribonucleoprotein K	chr9:83968082-84004074	TKS4_WT	TKS4_KO	585696	484592	0.827378	-0.273381402311671	-17.2622	31.6444	0.7342	0.134186	0.999775	-	ENSG00000165119.21
Splicing	HNRNPL	Heterogeneous Nuclear Ribonucleoprotein L	chr19:38836369-38852347	TKS4_WT	TKS4_KO	219838	224835	1.02273	0.0324258381251519	2.27304	32.6444	0.95485	0.0200648	0.999775	-	ENSG00000104824.18
Splicing	HNRNPLL	Heterogeneous Nuclear Ribonucleoprotein L like	chr2:38561968-38603035	TKS4_WT	TKS4_KO	66738.2	54688.4	0.819447	-0.287277445451331	-18.0553	33.6444	0.60165	0.220656	0.999775	-	ENSG00000143889.16
Splicing	HNRNPM	Heterogeneous Nuclear Ribonucleoprotein M	chr19:8444574-8489114	TKS4_WT	TKS4_KO	158190	137619	0.86996	-0.200978600595536	-13.004	34.6444	0.7382	0.131826	0.999775	+	ENSG00000099783.12
Splicing	HNRNPR	Heterogeneous Nuclear Ribonucleoprotein R	chr1:23304687-23344316	TKS4_WT	TKS4_KO	160728	149003	0.927051	-0.109279830418479	-7.29493	35.6444	0.8552	0.0679323	0.999775	-	ENSG00000125944.21
Splicing	HNRNPU	Heterogeneous Nuclear Ribonucleoprotein U	chr1:244850296-244864543	TKS4_WT	TKS4_KO	508520	421526	0.828927	-0.270682837296415	-17.1073	36.6444	0.68455	0.164595	0.999775
Splicing	FUS	FUS RNA Binding Protein	chr16:31180109-31194871	TKS4_WT	TKS4_KO	184351	170756	0.926255	-0.110518907333174	-7.37452	37.6444	0.88725	0.051954	0.999775	+	ENSG00000089280.19
Splicing	CCAR1	Cell Division Cycle And Apoptosis Regulator 1	chr10:68721238-68792377	TKS4_WT	TKS4_KO	79303.1	58532.5	0.738086	-0.438138717797593	-26.1914	38.6444	0.58625	0.231917	0.999775	+	ENSG00000060339.14
Splicing	WBP4	WW Domain Binding Protein 4	chr13:41061508-41084006	TKS4_WT	TKS4_KO	21185.1	14831.7	0.700102	-0.514363053476562	-29.9898	39.6444	0.797	0.0985417	0.999775	+	ENSG00000120688.9

## Sheet: Supplementary Table S2
mRNA levels
gene	locus	sample_1	sample_2	value_WT	value_KO	FC (KO/WT)	log2(fold_change)	Log10(FC)	%	p_value	-log10(p_value)	q_value	chain	ENSG_id
A1BG	chr19:58345182-58366578	TKS4_WT	TKS4_KO	32.188	249.004	7.71506	2,94767820324333	0.88734	671.506	0.4463	0.350373	0.9999	-	ENSG00000121410.12
A1CF	chr10:50799408-50885666	TKS4_WT	TKS4_KO	920.954	493.124	0.5355	-0,901042739648863	-0.271241	-46.45	0.15635	0.805902	0.9999	-	ENSG00000148584.15
A3GALT2	chr1:33306765-33321098	TKS4_WT	TKS4_KO	96.564	111.907	1.15873	0,212538297419076	0.0639804	15.8725	1	0	1	-	ENSG00000184389.9
A4GALT	chr22:42692111-42721301	TKS4_WT	TKS4_KO	10972.4	12180.4	1.11009	0,15068108576548	0.0453595	11.0093	0.84525	0.0730148	0.9999	-	ENSG00000128274.17
AAAS	chr12:53307455-53321610	TKS4_WT	TKS4_KO	45284.5	40019.2	0.883729	-0,178324581790719	-0.053681	-11.6271	0.74225	0.12945	0.9999	-	ENSG00000094914.14
AACS	chr12:125061274-125143327	TKS4_WT	TKS4_KO	12986.2	18672.8	1.43789	0,523955560176919	0.157726	43.7892	0.36	0.443697	0.9999	+	ENSG00000081760.17
AADAC	chr3:151733926-151928175	TKS4_WT	TKS4_KO	2069.54	3918.28	1.89327	0,920877472882158	0.277212	89.3266	0.53495	0.271687	0.9999	+	ENSG00000114771.14
AADAT	chr4:170060221-170091699	TKS4_WT	TKS4_KO	15752.5	13253.1	0.841334	-0,24924922606707	-0.0750315	-15.8666	0.6643	0.177636	0.9999	-	ENSG00000109576.14
AAGAB	chr15:67200666-67530146	TKS4_WT	TKS4_KO	80358.9	74026.5	0.921199	-0,118415843122168	-0.0356467	-7.88014	0.8743	0.0583395	0.9999	-	ENSG00000103591.13
AAK1	chr2:69457996-69643739	TKS4_WT	TKS4_KO	72693.8	61119	0.840773	-0,250211008281303	-0.075321	-15.9227	0.6351	0.197158	0.9999
AAMDC	chr11:77660008-77994670	TKS4_WT	TKS4_KO	2195.21	1571.4	0.715844	-0,48228240515659	-0.145181	-28.4156	0.72745	0.138197	0.9999	+	ENSG00000087884.15
AAMP	chr2:218264126-218270181	TKS4_WT	TKS4_KO	68204.5	76336.8	1.11923	0,162511556837294	0.0489209	11.9234	0.7634	0.117248	0.9999	-	ENSG00000127837.10
AANAT	chr17:76453350-76470797	TKS4_WT	TKS4_KO	188.42	204.058	1.08295	0,114968514695957	0.034609	8.29514	0.9173	0.0374886	0.9999	+	ENSG00000129673.10
AAR2	chr20:36064890-36256941	TKS4_WT	TKS4_KO	43393.1	38265.3	0.881829	-0,181428499899545	-0.0546154	-11.8171	0.8336	0.0790423	0.9999	+	ENSG00000131043.13
AARS1	chr16:70252294-70289509	TKS4_WT	TKS4_KO	148475	167792	1.1301	0,176453788001101	0.0531179	13.0103	0.75465	0.122254	0.9999	-	ENSG00000090861.17
AARS2	chr6:44297849-44313358	TKS4_WT	TKS4_KO	19048.8	21047.3	1.10491	0,143934337085994	0.0433286	10.4914	0.7931	0.100672	0.9999	-	ENSG00000124608.5
AASDH	chr4:56337686-56389418	TKS4_WT	TKS4_KO	22499.7	21679.6	0.963551	-0,0535673843680016	-0.0161254	-3.64492	0.9279	0.0324988	0.9999	-	ENSG00000157426.14
AASDHPPT	chr11:106046800-106098695	TKS4_WT	TKS4_KO	127893	100292	0.784187	-0,350730461572335	-0.10558	-21.5813	0.5803	0.236347	0.9999	+	ENSG00000149313.11
AASS	chr7:122073543-122144269	TKS4_WT	TKS4_KO	10011.5	10031.7	1.00202	0,00290793475084058	0.000875376	0.201766	0.99675	0.00141376	0.9999	-	ENSG00000008311.16
AATF	chr17:36948953-37056871	TKS4_WT	TKS4_KO	60402.9	54720.5	0.905925	-0,14253615564765	-0.0429077	-9.40748	0.78025	0.107766	0.9999	+	ENSG00000275700.6
AATK	chr17:81035130-81183166	TKS4_WT	TKS4_KO	3215.72	4339.77	1.34954	0,432465171254682	0.130185	34.9538	0.85115	0.0699939	0.9999	-	ENSG00000181409.14
ABAT	chr16:8674616-8784575	TKS4_WT	TKS4_KO	7743.36	8830.44	1.14039	0,189523315459156	0.0570522	14.0387	0.73415	0.134215	0.9999	+	ENSG00000183044.12
ABCA1	chr9:104781005-104939096	TKS4_WT	TKS4_KO	2232.02	5233.78	2.3448	1,22946625798334	0.370106	134.48	0.0868	1.06148	0.9999	-	ENSG00000165029.17
ABCA10	chr17:69148006-69327133	TKS4_WT	TKS4_KO	16100.9	14283.2	0.887106	-0,172820957181651	-0.0520243	-11.2894	0.7555	0.121766	0.9999
ABCA12	chr2:214810228-215138626	TKS4_WT	TKS4_KO	1055.18	2309.5	2.18861	1,13001716918954	0.340169	118.861	0.22425	0.649268	0.9999	-	ENSG00000144452.15
ABCA2	chr9:137007233-137037955	TKS4_WT	TKS4_KO	86342.4	97103.3	1.12463	0,169450945520977	0.0510098	12.463	0.8043	0.0945819	0.9999	-	ENSG00000107331.18
ABCA3	chr16:2275880-2340728	TKS4_WT	TKS4_KO	5718.51	15497.7	2.71006	1,43832700681901	0.43298	171.006	0.03815	1.41851	0.9999	-	ENSG00000167972.14
ABCA4	chr1:93992833-94121148	TKS4_WT	TKS4_KO	211.191	922.774	4.36779	2,12690237356451	0.640261	336.779	0.07425	1.1293	0.9999	-	ENSG00000198691.14
ABCA7	chr19:1040106-1065572	TKS4_WT	TKS4_KO	43823.5	66835.2	1.5251	0,608902280578026	0.183298	52.5098	0.3844	0.415217	0.9999	+	ENSG00000064687.13
ABCB1	chr7:87503016-87832296	TKS4_WT	TKS4_KO	4101.4	1995.61	0.486581	-1,03924953301597	-0.312845	-51.3419	0.4377	0.358823	0.9999	-	ENSG00000085563.15
ABCB10	chr1:229516581-229558988	TKS4_WT	TKS4_KO	41038.4	37544.1	0.914853	-0,128387949084995	-0.0386486	-8.51469	0.81895	0.0867426	0.9999	-	ENSG00000135776.5
ABCB11	chr2:168915467-169031396	TKS4_WT	TKS4_KO	27.4797	0	0.00362586	-8,10746295370181	-2.44059	-99.6374	1	0	1	-	ENSG00000073734.10
ABCB4	chr7:87345645-87476722	TKS4_WT	TKS4_KO	64.376	17.6076	0.274639	-1,86439355424695	-0.561238	-72.5361	1	0	1	-	ENSG00000005471.19
ABCB5	chr7:20615666-20757008	TKS4_WT	TKS4_KO	27.4797	0	0.00362586	-8,10746295370181	-2.44059	-99.6374	1	0	1	+	ENSG00000004846.17
ABCB6	chr2:219209771-219218958	TKS4_WT	TKS4_KO	16485.4	20676.4	1.25422	0,326794350975072	0.0983749	25.4223	0.57425	0.240899	0.9999	-	ENSG00000115657.14
ABCB7	chrX:75051047-75156283	TKS4_WT	TKS4_KO	33570.6	28597.5	0.851862	-0,231308543122735	-0.0696308	-14.8138	0.67455	0.170986	0.9999	-	ENSG00000131269.19
ABCB8	chr7:151028449-151047782	TKS4_WT	TKS4_KO	23000.9	30201.5	1.31306	0,392928396022604	0.118283	31.3056	0.4709	0.327071	0.9999	+	ENSG00000197150.13
ABCB9	chr12:122917323-122982913	TKS4_WT	TKS4_KO	12900.6	15406.1	1.19421	0,25606171000639	0.0770823	19.4214	0.7945	0.0999061	0.9999	-	ENSG00000150967.19
ABCC1	chr16:15949615-16143062	TKS4_WT	TKS4_KO	136393	153463	1.12515	0,170121141565401	0.0512116	12.5153	0.7578	0.120445	0.9999	+	ENSG00000103222.20
ABCC10	chr6:43427537-43456632	TKS4_WT	TKS4_KO	21674	29969	1.38271	0,467503671114526	0.140733	38.2715	0.46605	0.331567	0.9999	+	ENSG00000124574.15
ABCC11	chr16:48164841-48448435	TKS4_WT	TKS4_KO	939.788	893.895	0.951172	-0,0722220883477153	-0.021741	-4.88282	0.95785	0.0187025	0.9999	-	ENSG00000121270.16
ABCC2	chr10:99782601-99853741	TKS4_WT	TKS4_KO	111335	193624	1.73911	0,798350038260172	0.240327	73.9111	0.16045	0.79466	0.9999	+	ENSG00000023839.12
ABCC3	chr17:50634880-50692253	TKS4_WT	TKS4_KO	13201.3	34891.5	2.64302	1,40218882113877	0.422101	164.302	0.03	1.52288	0.9999	+	ENSG00000108846.16
ABCC4	chr13:95019828-95310895	TKS4_WT	TKS4_KO	106494	103492	0.971811	-0,0412528595166802	-0.0124183	-2.81894	0.9372	0.0281677	0.9999	-	ENSG00000125257.16
ABCC5	chr3:183919933-184018010	TKS4_WT	TKS4_KO	27641.6	28959.4	1.04767	0,0671903477472769	0.0202263	4.76743	0.90025	0.0456369	0.9999	-	ENSG00000114770.17
ABCC6	chr16:16149564-16223617	TKS4_WT	TKS4_KO	1501.11	2168.02	1.44425	0,530318802866704	0.159642	44.4248	0.48545	0.313855	0.9999	-	ENSG00000091262.17
ABCD1	chrX:153724850-153744755	TKS4_WT	TKS4_KO	6348.14	11534.9	1.81704	0,861589427530269	0.259364	81.7039	0.2	0.69897	0.9999	+	ENSG00000101986.12
ABCD2	chr12:39530964-40106085	TKS4_WT	TKS4_KO	233.962	44.2855	0.189631	-2,39873037737911	-0.72209	-81.0369	0.0594	1.22621	0.9999	-	ENSG00000173208.4
ABCD3	chr1:94418085-94518663	TKS4_WT	TKS4_KO	142902	123312	0.862913	-0,212712746394879	-0.0640329	-13.7087	0.72865	0.137481	0.9999	+	ENSG00000117528.14
ABCD4	chr14:74285268-74303062	TKS4_WT	TKS4_KO	11212.6	18100	1.61425	0,690863949371458	0.207971	61.425	0.24335	0.613769	0.9999	-	ENSG00000119688.21
ABCE1	chr4:144967116-145129524	TKS4_WT	TKS4_KO	391060	292951	0.74912	-0,416730477774225	-0.125448	-25.088	0.6015	0.220764	0.9999	+	ENSG00000164163.11
ABCF1	chr6:30571441-30591522	TKS4_WT	TKS4_KO	69428.2	59251.7	0.853424	-0,228664864428731	-0.068835	-14.6576	0.6669	0.175939	0.9999	+	ENSG00000204574.14
ABCF2	chr7:151207836-151227205	TKS4_WT	TKS4_KO	126457	116335	0.919957	-0,120361595472754	-0.0362325	-8.0043	0.83045	0.0806865	0.9999
ABCF3	chr3:184186074-184194012	TKS4_WT	TKS4_KO	47110.7	45672.6	0.969474	-0,0447257519732279	-0.0134638	-3.05259	0.93065	0.0312136	0.9999	+	ENSG00000161204.12
ABCG1	chr21:42199688-42304387	TKS4_WT	TKS4_KO	1212.96	1537.33	1.2674	0,341869814919061	0.102913	26.7398	0.60615	0.21742	0.9999	+	ENSG00000160179.19
ABCG2	chr4:88090263-88231626	TKS4_WT	TKS4_KO	3879.26	2967.5	0.764972	-0,386522016906159	-0.116355	-23.5028	0.6144	0.211549	0.9999	-	ENSG00000118777.12
ABCG4	chr11:119149051-119162666	TKS4_WT	TKS4_KO	3399.43	3288.82	0.967463	-0,0477213848541998	-0.0143656	-3.25369	0.94995	0.0222993	0.9999	+	ENSG00000172350.10
ABCG8	chr2:43774038-43882988	TKS4_WT	TKS4_KO	32.188	46.6719	1.44858	0,534643956531592	0.160944	44.8585	1	0	1	+	ENSG00000143921.9
ABHD1	chr2:27123779-27134642	TKS4_WT	TKS4_KO	545.655	490.553	0.899035	-0,153550361460389	-0.0462233	-10.0965	0.91665	0.0377965	0.9999	+	ENSG00000143994.14
ABHD10	chr3:111979025-111993368	TKS4_WT	TKS4_KO	420948	345087	0.819785	-0,286681825751508	-0.0862998	-18.0215	0.64925	0.187588	0.9999	+	ENSG00000144827.9
ABHD11	chr7:73736093-73738867	TKS4_WT	TKS4_KO	43301.7	38145.4	0.880922	-0,18291412387579	-0.0550626	-11.9078	0.76325	0.117333	0.9999	-	ENSG00000106077.19
ABHD12	chr20:25248038-25390835	TKS4_WT	TKS4_KO	19722.5	23010.8	1.16673	0,222467658688827	0.0669694	16.6728	0.8748	0.0580912	0.9999	-	ENSG00000100997.20
ABHD13	chr13:108218391-108235440	TKS4_WT	TKS4_KO	17036	17511	1.02788	0,0396746093392745	0.0119432	2.7882	0.94285	0.0255574	0.9999	+	ENSG00000139826.6
ABHD14B	chr3:51968509-51974630	TKS4_WT	TKS4_KO	21456.9	41286.8	1.92417	0,944235718273044	0.284243	92.4169	0.0581	1.23582	0.9999	-	ENSG00000114779.20
ABHD15	chr17:29560546-29567037	TKS4_WT	TKS4_KO	13485.7	18465	1.36923	0,453359968483304	0.136475	36.9225	0.44395	0.352666	0.9999	-	ENSG00000168792.5
ABHD16A	chr6:31682894-31703324	TKS4_WT	TKS4_KO	17616.3	19952.9	1.13264	0,179686544374184	0.054091	13.2638	0.7523	0.123609	0.9999	-	ENSG00000204427.12
ABHD16B	chr20:63861214-63865073	TKS4_WT	TKS4_KO	960.161	649.774	0.676768	-0,563266555091417	-0.16956	-32.3232	0.82495	0.0835724	0.9999	+	ENSG00000183260.7
ABHD17A	chr19:1876809-1885519	TKS4_WT	TKS4_KO	77477.9	78400.2	1.0119	0,0170724618363507	0.00513932	1.1904	0.97495	0.0110177	0.9999	-	ENSG00000129968.17
ABHD17B	chr9:71862451-71911536	TKS4_WT	TKS4_KO	24080.7	20944.9	0.86978	-0,201277437164819	-0.0605905	-13.022	0.7138	0.146423	0.9999	-	ENSG00000107362.14
ABHD17C	chr15:80695309-80755621	TKS4_WT	TKS4_KO	26277.4	25295.3	0.962626	-0,0549529735717526	-0.0165425	-3.73742	0.91285	0.0396006	0.9999	+	ENSG00000136379.12
ABHD18	chr4:127917731-128039953	TKS4_WT	TKS4_KO	19761.1	17678.7	0.894622	-0,160650206393333	-0.0483605	-10.5378	0.826	0.08302	0.9999	+	ENSG00000164074.16
ABHD2	chr15:89088421-89202355	TKS4_WT	TKS4_KO	74735.3	72505	0.970157	-0,0437092901819834	-0.0131578	-2.98426	0.9316	0.0307705	0.9999	+	ENSG00000140526.18
ABHD3	chr18:21650896-21704793	TKS4_WT	TKS4_KO	31606.8	33907.6	1.07279	0,101373385077099	0.0305164	7.27942	0.85825	0.0663862	0.9999	-	ENSG00000158201.10
ABHD4	chr14:22598237-22612864	TKS4_WT	TKS4_KO	7481.91	6726.75	0.89907	-0,153494805802373	-0.0462065	-10.093	0.8089	0.0921052	0.9999	+	ENSG00000100439.11
ABHD5	chr3:43365847-43734371	TKS4_WT	TKS4_KO	35805.2	27106.5	0.757056	-0,401528988760495	-0.120872	-24.2944	0.63155	0.199592	0.9999	+	ENSG00000011198.10
ABHD6	chr3:58237531-58294736	TKS4_WT	TKS4_KO	15464.3	16987.9	1.09852	0,135565154106098	0.0408092	9.85231	0.8201	0.0861332	0.9999	+	ENSG00000163686.15
ABHD8	chr19:17292130-17306843	TKS4_WT	TKS4_KO	2645.75	2566.71	0.970127	-0,0437547649415709	-0.0131715	-2.98732	0.93145	0.0308405	0.9999	-	ENSG00000127220.6
ABI1	chr10:26697423-26860986	TKS4_WT	TKS4_KO	36069.3	31191.6	0.864769	-0,209613240515902	-0.0630999	-13.5231	0.8021	0.0957715	0.9999	-	ENSG00000136754.18
ABI2	chr2:203325012-203432169	TKS4_WT	TKS4_KO	97877.9	102180	1.04395	0,0620577253885737	0.0186812	4.39537	0.8951	0.0481284	0.9999	+	ENSG00000138443.17
ABI3	chr17:49210581-49223225	TKS4_WT	TKS4_KO	32.188	0	0.00309713	-8,33485426933163	-2.50904	-99.6903	1	0	1	+	ENSG00000108798.9
ABI3BP	chr3:100749155-100993508	TKS4_WT	TKS4_KO	156.232	110.714	0.708838	-0,496472957673036	-0.149453	-29.1162	1	0	1	-	ENSG00000154175.18
ABITRAM	chr9:108934396-109013535	TKS4_WT	TKS4_KO	14114	14742.3	1.04452	0,0628342713694239	0.018915	4.45158	0.95225	0.021249	0.9999	+	ENSG00000119328.12
ABL1	chr9:130713880-130887675	TKS4_WT	TKS4_KO	72588.7	67343.1	0.927735	-0,108214690053938	-0.0325759	-7.22646	0.85015	0.0705044	0.9999	+	ENSG00000097007.19
ABL2	chr1:179099329-179229693	TKS4_WT	TKS4_KO	102254	116717	1.14144	0,190857252128888	0.0574538	14.1442	0.7562	0.121363	0.9999	-	ENSG00000143322.21
ABLIM1	chr10:114431109-114821643	TKS4_WT	TKS4_KO	352807	301786	0.855386	-0,225353236290735	-0.0678381	-14.4614	0.7156	0.14533	0.9999	-	ENSG00000099204.21
ABLIM2	chr4:7965311-8158813	TKS4_WT	TKS4_KO	3091.67	6631.09	2.14479	1,10083479270234	0.331384	114.479	0.0429	1.36754	0.9999	-	ENSG00000163995.21
ABLIM3	chr5:149141492-149260542	TKS4_WT	TKS4_KO	14089.3	22360.7	1.58707	0,666361628763531	0.200595	58.7065	0.26905	0.570167	0.9999	+	ENSG00000173210.20
ABO	chr9:133250400-133275201	TKS4_WT	TKS4_KO	128.752	862.977	6.6982	2,74377434573522	0.825958	569.82	0.0713	1.14691	0.9999	-	ENSG00000175164.16
ABR	chr17:997128-1229722	TKS4_WT	TKS4_KO	62099.9	63817.4	1.02766	0,0393588248432508	0.0118482	2.7657	0.9588	0.018272	0.9999	-	ENSG00000159842.16
ABRACL	chr6:139028744-139043302	TKS4_WT	TKS4_KO	18413.9	16850.6	0.915103	-0,127994527557329	-0.0385302	-8.48974	0.8141	0.0893222	0.9999	+	ENSG00000146386.8
ABRAXAS1	chr4:83456057-83485137	TKS4_WT	TKS4_KO	24066.7	19990.5	0.83063	-0,26772255520429	-0.0805925	-16.937	0.84285	0.0742497	0.9999	-	ENSG00000163322.14
ABRAXAS2	chr10:124801802-124836670	TKS4_WT	TKS4_KO	56403.3	41674	0.738858	-0,436631088086768	-0.131439	-26.1142	0.4102	0.387004	0.9999	+	ENSG00000165660.8
ABT1	chr6:26596952-26600739	TKS4_WT	TKS4_KO	62883	56146.9	0.892879	-0,16346340127728	-0.0492074	-10.7121	0.7719	0.112439	0.9999	+	ENSG00000146109.5
ABTB1	chr3:127672927-127680926	TKS4_WT	TKS4_KO	5757.8	11001.3	1.91066	0,934072489491081	0.281184	91.0662	0.2136	0.670399	0.9999	+	ENSG00000114626.18
ABTB2	chr11:34150986-34358010	TKS4_WT	TKS4_KO	14066.4	16651.4	1.18377	0,243388739401577	0.0732673	18.377	0.71155	0.147795	0.9999	-	ENSG00000166016.6
ACAA1	chr3:38038594-38137127	TKS4_WT	TKS4_KO	15383	20973.3	1.36341	0,44721449154707	0.134625	36.3405	0.49605	0.304475	0.9999	-	ENSG00000060971.19
ACAA2	chr18:49782163-49813533	TKS4_WT	TKS4_KO	10061.2	8616.04	0.856364	-0,223703127939131	-0.0673414	-14.3636	0.69515	0.157921	0.9999	-	ENSG00000167315.18
ACACA	chr17:37084991-37406836	TKS4_WT	TKS4_KO	232874	320095	1.37454	0,458950398824882	0.138158	37.4541	0.43895	0.357585	0.9999	-	ENSG00000278540.5
ACACB	chr12:109112665-109268226	TKS4_WT	TKS4_KO	9231.79	12527.5	1.35699	0,440412114776464	0.132577	35.6992	0.4793	0.319393	0.9999	+	ENSG00000076555.16
ACAD10	chr12:111686052-111757099	TKS4_WT	TKS4_KO	17251.1	21332.6	1.23659	0,306369853952398	0.0922265	23.6592	0.5782	0.237922	0.9999	+	ENSG00000111271.15
ACAD11	chr3:132558137-132874211	TKS4_WT	TKS4_KO	29170.5	27872.8	0.955513	-0,0656519472381871	-0.0197632	-4.44866	0.94125	0.026295	0.9999
ACAD8	chr11:134253537-134265858	TKS4_WT	TKS4_KO	25428.2	26257	1.03259	0,0462725702896304	0.0139294	3.25936	0.9417	0.0260874	0.9999	+	ENSG00000151498.12
ACAD9	chr3:128879595-129040742	TKS4_WT	TKS4_KO	36694.2	42923.6	1.16976	0,226218465131922	0.0680985	16.9765	0.7304	0.136439	0.9999	+	ENSG00000177646.20
ACADM	chr1:75724708-75763679	TKS4_WT	TKS4_KO	32714.5	27773.7	0.848973	-0,23621005142874	-0.0711063	-15.1027	0.6609	0.179864	0.9999	+	ENSG00000117054.15
ACADS	chr12:120725825-120740008	TKS4_WT	TKS4_KO	12414.1	19212.8	1.54766	0,63008400231778	0.189674	54.7655	0.2863	0.543179	0.9999	+	ENSG00000122971.9
ACADSB	chr10:123009005-123058290	TKS4_WT	TKS4_KO	47375.6	43794.8	0.924417	-0,113384384985553	-0.0341321	-7.55831	0.82825	0.0818386	0.9999	+	ENSG00000196177.13
ACADVL	chr17:7187179-7225267	TKS4_WT	TKS4_KO	84114.7	134581	1.59997	0,678044248052857	0.204112	59.9969	0.22705	0.643878	0.9999	+	ENSG00000072778.20
ACAP2	chr3:195274741-195443176	TKS4_WT	TKS4_KO	113470	89198.6	0.786099	-0,347217600177736	-0.104523	-21.3901	0.53685	0.270147	0.9999	-	ENSG00000114331.16
ACAT1	chr11:108116704-108148822	TKS4_WT	TKS4_KO	72876.4	70880.4	0.972611	-0,0400648923923613	-0.0120607	-2.73888	0.93955	0.0270801	0.9999	+	ENSG00000075239.14
ACAT2	chr6:159669068-159789602	TKS4_WT	TKS4_KO	57327.5	44235.5	0.771628	-0,374021990787361	-0.112592	-22.8372	0.83765	0.0769374	0.9999	+	ENSG00000120437.9
ACBD3	chr1:226144678-226186741	TKS4_WT	TKS4_KO	41309.5	44668.3	1.08131	0,112777488268185	0.0339494	8.1308	0.8317	0.0800333	0.9999	-	ENSG00000182827.9
ACBD4	chr17:45132599-45144181	TKS4_WT	TKS4_KO	3550.95	4167.06	1.1735	0,230818819892854	0.0694834	17.3501	0.70095	0.154313	0.9999	+	ENSG00000181513.15
ACBD5	chr10:27110110-27243542	TKS4_WT	TKS4_KO	31999.4	33103.4	1.0345	0,0489343969763127	0.0147307	3.45005	0.9476	0.0233749	0.9999	-	ENSG00000107897.20
ACBD6	chr1:180228371-180502577	TKS4_WT	TKS4_KO	38042.5	33143.7	0.871229	-0,198876829960017	-0.0598679	-12.8771	0.718	0.143876	0.9999
ACBD7	chr10:15015071-15088776	TKS4_WT	TKS4_KO	8010.36	6913.2	0.863034	-0,21251055945462	-0.0639721	-13.6966	0.7245	0.139962	0.9999
ACCS	chr11:44066117-44084237	TKS4_WT	TKS4_KO	4545.7	6961.82	1.53151	0,61495102423426	0.185119	53.1506	0.2702	0.568315	0.9999	+	ENSG00000110455.14
ACCSL	chr11:44047980-44059977	TKS4_WT	TKS4_KO	32.188	120.444	3.7334	1,90048985884104	0.572104	273.34	0.2973	0.526805	0.9999	+	ENSG00000205126.2
ACD	chr16:67645003-67660832	TKS4_WT	TKS4_KO	22026	20308	0.922002	-0,11715880098508	-0.0352683	-7.79984	0.8519	0.0696114	0.9999	-	ENSG00000102977.18
ACE	chr17:63477060-63498373	TKS4_WT	TKS4_KO	1957.22	5920.31	3.02475	1,59681744897036	0.48069	202.475	0.0393	1.40561	0.9999	+	ENSG00000159640.17
ACER2	chr9:19408926-19455173	TKS4_WT	TKS4_KO	11651.7	11150.4	0.956977	-0,063444439792753	-0.0190987	-4.30234	0.91685	0.0377017	0.9999	+	ENSG00000177076.6
ACER3	chr11:76860887-77026797	TKS4_WT	TKS4_KO	53392.9	49340.9	0.92411	-0,113863656980165	-0.0342764	-7.58901	0.83085	0.0804774	0.9999	+	ENSG00000078124.13
ACHE	chr7:100889993-100896994	TKS4_WT	TKS4_KO	1450.86	2694.5	1.85712	0,893063380150393	0.268839	85.7115	0.1919	0.716925	0.9999	-	ENSG00000087085.16
ACIN1	chr14:23057659-23104989	TKS4_WT	TKS4_KO	128724	127623	0.991447	-0,012392700267895	-0.00373057	-0.855318	0.98535	0.00640948	0.9999	-	ENSG00000100813.15
ACKR2	chr3:42809444-42867286	TKS4_WT	TKS4_KO	220.608	303.552	1.37581	0,460279947598011	0.138558	37.5809	0.70285	0.153137	0.9999	+	ENSG00000144648.16
ACKR4	chr3:132558137-132874211	TKS4_WT	TKS4_KO	335.235	186.873	0.557571	-0,842773118232864	-0.2537	-44.2429	0.66225	0.178978	0.9999	+	ENSG00000129048.7
ACLY	chr17:41866915-41930542	TKS4_WT	TKS4_KO	416464	412217	0.989802	-0,0147877844555605	-0.00445157	-1.01978	0.9805	0.0085524	0.9999	-	ENSG00000131473.17
ACMSD	chr2:134838318-134918606	TKS4_WT	TKS4_KO	54.9594	39.7504	0.723771	-0,466394683108828	-0.140399	-27.6229	1	0	1	+	ENSG00000153086.14
ACO1	chr9:32384642-32454769	TKS4_WT	TKS4_KO	67076.4	74606.1	1.11226	0,15348811561464	0.0462045	11.2255	0.7767	0.109747	0.9999	+	ENSG00000122729.19
ACO2	chr22:41468755-41544606	TKS4_WT	TKS4_KO	102926	113443	1.10218	0,140359994771512	0.0422526	10.218	0.83705	0.0772486	0.9999	+	ENSG00000100412.17
ACOT1	chr14:73478483-73558947	TKS4_WT	TKS4_KO	5014.4	4730.54	0.943392	-0,0840704792226153	-0.0253077	-5.66078	0.897	0.0472076	0.9999
ACOT11	chr1:54548227-54639192	TKS4_WT	TKS4_KO	17822.3	23581.5	1.32314	0,403969981650802	0.121607	32.3144	0.51725	0.2863	0.9999	+	ENSG00000162390.18
ACOT13	chr6:24667076-24720920	TKS4_WT	TKS4_KO	17207.1	15754.6	0.915588	-0,127230074505969	-0.0383001	-8.44123	0.962	0.0168249	0.9999	+	ENSG00000112304.11
ACOT7	chr1:6264271-6393767	TKS4_WT	TKS4_KO	87909.6	98665.8	1.12236	0,166529198006733	0.0501303	12.2355	0.7684	0.114413	0.9999	-	ENSG00000097021.20
ACOT8	chr20:45833417-45857405	TKS4_WT	TKS4_KO	6099.54	7340.6	1.20346	0,267193545723883	0.0804333	20.3464	0.77365	0.111455	0.9999	-	ENSG00000101473.17
ACOT9	chrX:23701054-23743276	TKS4_WT	TKS4_KO	58274.8	57884.9	0.993309	-0,00968507908452809	-0.0029155	-0.66907	0.9838	0.00709318	0.9999	-	ENSG00000123130.17
ACOX1	chr17:75941506-75979199	TKS4_WT	TKS4_KO	112919	123120	1.09034	0,124776773335564	0.0375616	9.0339	0.82415	0.0839937	0.9999	-	ENSG00000161533.12
ACOX2	chr3:58505135-58706084	TKS4_WT	TKS4_KO	4640.04	6082.15	1.31079	0,39043678269699	0.117533	31.079	0.557	0.254145	0.9999	-	ENSG00000168306.13
ACOX3	chr4:8366262-8440723	TKS4_WT	TKS4_KO	14672.8	15229.5	1.03794	0,0537240122885988	0.0161725	3.79407	0.9322	0.0304909	0.9999	-	ENSG00000087008.16
ACOXL	chr2:110732538-111120610	TKS4_WT	TKS4_KO	4724.7	6124.07	1.29618	0,374261069383973	0.112664	29.6175	0.60215	0.220295	0.9999	+	ENSG00000153093.20
ACP1	chr2:264946-278283	TKS4_WT	TKS4_KO	131206	94468.4	0.720001	-0,473929538987356	-0.142667	-27.9999	0.47255	0.325552	0.9999	+	ENSG00000143727.16
ACP2	chr11:47239301-47269033	TKS4_WT	TKS4_KO	12315.9	13112.1	1.06465	0,0903759926073895	0.0272059	6.46476	0.91885	0.0367554	0.9999	-	ENSG00000134575.13
ACP3	chr3:132317402-132368765	TKS4_WT	TKS4_KO	59.6677	177.142	2.96551	1,56828258072327	0.4721	196.551	1	0	1	+	ENSG00000014257.16
ACP5	chr19:11574659-11619161	TKS4_WT	TKS4_KO	32.188	67.6214	2.09742	1,0686137187236	0.321685	109.742	1	0	1	-	ENSG00000102575.14
ACP6	chr1:147541500-147670524	TKS4_WT	TKS4_KO	12918	13525	1.04699	0,0662453674943071	0.0199418	4.69883	0.94675	0.0237647	0.9999	-	ENSG00000162836.12
ACP7	chr19:39083010-39112074	TKS4_WT	TKS4_KO	3052.47	4136.03	1.35497	0,438257152021706	0.131929	35.4966	0.50925	0.293069	0.9999	+	ENSG00000183760.11
ACR	chr22:50738203-50745339	TKS4_WT	TKS4_KO	215.899	366.401	1.69677	0,762792501536259	0.229623	69.6772	0.54925	0.26023	0.9999	+	ENSG00000100312.11
ACRBP	chr12:6638074-6647432	TKS4_WT	TKS4_KO	128.752	134.05	1.04112	0,0581321241708772	0.0174995	4.11169	1	0	1	-	ENSG00000111644.8
ACRV1	chr11:125624909-125680847	TKS4_WT	TKS4_KO	0	152.85	1529.5	10,5788443915582	3.18455	152850	0.09565	1.01932	0.9999	-	ENSG00000134940.14
ACSBG1	chr15:78149361-78234625	TKS4_WT	TKS4_KO	2208.47	2486.38	1.12583	0,170992267957855	0.0514738	12.5833	0.89235	0.0494648	0.9999	-	ENSG00000103740.10
ACSBG2	chr19:6125425-6199571	TKS4_WT	TKS4_KO	174.295	421.848	2.4195	1,27470653727793	0.383725	141.95	0.046	1.33724	0.9999	+	ENSG00000130377.14
ACSF2	chr17:50426217-50474845	TKS4_WT	TKS4_KO	9614.97	15486.2	1.61063	0,687623229488879	0.206995	61.0628	0.2961	0.528562	0.9999	+	ENSG00000167107.13
ACSL1	chr4:184755594-184826593	TKS4_WT	TKS4_KO	23523.1	25315.9	1.07621	0,105965140990825	0.0318987	7.62141	0.8342	0.0787298	0.9999	-	ENSG00000151726.15
ACSL3	chr2:222861035-222944639	TKS4_WT	TKS4_KO	151468	157518	1.03994	0,0565036281960672	0.0170093	3.99424	0.9178	0.0372519	0.9999	+	ENSG00000123983.15
ACSL4	chrX:109641334-109734958	TKS4_WT	TKS4_KO	99785.2	101194	1.01412	0,0202259740390519	0.00608862	1.41183	0.969	0.0136762	0.9999	-	ENSG00000068366.21
ACSL5	chr10:112374115-112855368	TKS4_WT	TKS4_KO	71002.7	40568.2	0.571362	-0,80752307031641	-0.243089	-42.8638	0.54995	0.259677	0.9999	+	ENSG00000197142.11
ACSL6	chr5:131949972-132012068	TKS4_WT	TKS4_KO	789.034	1430.86	1.81333	0,858641139597828	0.258477	81.333	0.1571	0.803824	0.9999	-	ENSG00000164398.15
ACSM2A	chr16:20451503-20487669	TKS4_WT	TKS4_KO	32.188	0	0.00309713	-8,33485426933163	-2.50904	-99.6903	1	0	1	+	ENSG00000183747.12
ACSM3	chr16:20742439-20849682	TKS4_WT	TKS4_KO	5171.48	8130.89	1.57224	0,652825906155611	0.19652	57.2245	0.5778	0.238222	0.9999	+	ENSG00000005187.12
ACSS2	chr20:34874941-34927966	TKS4_WT	TKS4_KO	27395.1	59882.8	2.18589	1,12822095355661	0.339628	118.589	0.05725	1.24222	0.9999	+	ENSG00000131069.20
ACTA1	chr1:229431244-229434094	TKS4_WT	TKS4_KO	275.567	158.579	0.575618	-0,796815362451129	-0.239865	-42.4382	0.5348	0.271809	0.9999	-	ENSG00000143632.15
ACTA2	chr10:88932683-89017059	TKS4_WT	TKS4_KO	1351.13	3810.28	2.81993	1,49566161707361	0.450239	181.993	0.39515	0.403238	0.9999	-	ENSG00000107796.13
ACTB	chr7:5527147-5530601	TKS4_WT	TKS4_KO	2477230	2199620	0.887935	-0,171473505947904	-0.0516187	-11.2065	0.82385	0.0841519	0.9999	-	ENSG00000075624.17
ACTBL2	chr5:57480017-57482811	TKS4_WT	TKS4_KO	109.919	193.261	1.75752	0,813544144372431	0.244901	75.7524	1	0	1	-	ENSG00000169067.4
ACTG1	chr17:81509970-81512799	TKS4_WT	TKS4_KO	3160700	3480630	1.10122	0,139104348435641	0.0418746	10.1221	0.91115	0.0404101	0.9999	-	ENSG00000184009.13
ACTL10	chr20:33657086-33674428	TKS4_WT	TKS4_KO	64.376	114.293	1.7742	0,827164623629494	0.249001	77.4195	1	0	1	+	ENSG00000288649.2
ACTL6A	chr3:179562925-179604646	TKS4_WT	TKS4_KO	51575.9	46068.2	0.893212	-0,162925527618973	-0.0490455	-10.6788	0.87835	0.0563324	0.9999	+	ENSG00000136518.17
ACTL7A	chr9:108862265-108863756	TKS4_WT	TKS4_KO	32.188	70.0079	2.17133	1,11857894169263	0.336726	117.133	1	0	1	+	ENSG00000187003.7
ACTL7B	chr9:108854587-108855986	TKS4_WT	TKS4_KO	160.94	0	0.000620964	-10,653203362034	-3.20693	-99.9379	1	0	1	-	ENSG00000148156.8
ACTL8	chr1:17755332-17827063	TKS4_WT	TKS4_KO	431.028	353.879	0.821053	-0,28445248853493	-0.0856287	-17.8947	0.7862	0.104467	0.9999	+	ENSG00000117148.8
ACTN1	chr14:68874122-68979302	TKS4_WT	TKS4_KO	118663	118145	0.995635	-0,00631158231099553	-0.00189998	-0.43653	0.98975	0.00447449	0.9999	-	ENSG00000072110.16
ACTN4	chr19:38647648-38744474	TKS4_WT	TKS4_KO	362123	377562	1.04263	0,0602337430972682	0.0181322	4.26347	0.92275	0.0349159	0.9999	+	ENSG00000130402.13
ACTR10	chr14:58200148-58235636	TKS4_WT	TKS4_KO	33075.2	29042	0.87806	-0,187608465431499	-0.0564758	-12.194	0.7553	0.121881	0.9999	+	ENSG00000131966.14
ACTR1A	chr10:102460895-102502712	TKS4_WT	TKS4_KO	144217	144908	1.00479	0,00689600333243338	0.0020759	0.479139	0.9913	0.00379489	0.9999	-	ENSG00000138107.13
ACTR1B	chr2:97655938-97703066	TKS4_WT	TKS4_KO	14995.4	26567.9	1.77173	0,825160000678634	0.248398	77.1732	0.1378	0.860751	0.9999	-	ENSG00000115073.8
ACTR2	chr2:65227830-65271253	TKS4_WT	TKS4_KO	235005	258931	1.10181	0,139876190549346	0.0421069	10.1811	0.80965	0.0917027	0.9999	+	ENSG00000138071.15
ACTR3	chr2:113831182-113962596	TKS4_WT	TKS4_KO	176579	170000	0.962742	-0,0547789999007602	-0.0164901	-3.72581	0.93025	0.0314003	0.9999	+	ENSG00000115091.12
ACTR3B	chr7:152759751-153070979	TKS4_WT	TKS4_KO	23496.7	24996	1.06381	0,0892387255815196	0.0268635	6.38087	0.87695	0.0570252	0.9999	+	ENSG00000133627.18
ACTR3C	chr7:149881358-150338156	TKS4_WT	TKS4_KO	5305.71	5651.91	1.06525	0,0911910043392417	0.0274512	6.52492	0.888	0.051587	0.9999	-	ENSG00000106526.11
ACTR5	chr20:38748459-38772520	TKS4_WT	TKS4_KO	37688.2	37471.6	0.994253	-0,00831529033897083	-0.00250315	-0.574714	0.98825	0.00513318	0.9999	+	ENSG00000101442.10
ACTR6	chr12:100200814-100341724	TKS4_WT	TKS4_KO	34875.6	27597	0.791299	-0,337705502454398	-0.101659	-20.8701	0.7734	0.111596	0.9999	+	ENSG00000075089.10
ACTR8	chr3:53846549-53882160	TKS4_WT	TKS4_KO	47806.9	43517.8	0.910283	-0,135612936501226	-0.0408236	-8.9717	0.8365	0.0775341	0.9999	-	ENSG00000113812.14
ACTRT3	chr3:169766920-169769561	TKS4_WT	TKS4_KO	2781.7	2472.01	0.888673	-0,170275760348978	-0.0512581	-11.1327	0.83365	0.0790162	0.9999	-	ENSG00000184378.3
ACVR1	chr2:157736445-157876330	TKS4_WT	TKS4_KO	15874.6	17010.3	1.07154	0,0996877383128606	0.030009	7.15415	0.87	0.0604807	0.9999	-	ENSG00000115170.16
ACVR1B	chr12:51951695-51997079	TKS4_WT	TKS4_KO	21381.8	26721.7	1.24974	0,321627135148241	0.0968194	24.9739	0.5902	0.229001	0.9999	+	ENSG00000135503.13
ACVR1C	chr2:157526766-157628864	TKS4_WT	TKS4_KO	2959.76	4775.49	1.61345	0,690150043173541	0.207756	61.3451	0.34435	0.463	0.9999	-	ENSG00000123612.16
ACVR2A	chr2:147844516-148516971	TKS4_WT	TKS4_KO	14346.3	12980.4	0.904791	-0,144342804995591	-0.0434515	-9.52086	0.9099	0.0410063	0.9999	+	ENSG00000121989.15
ACVR2B	chr3:38346759-38493142	TKS4_WT	TKS4_KO	61925.7	65266.2	1.05394	0,0757976527396698	0.0228174	5.39436	0.91225	0.0398861	0.9999	+	ENSG00000114739.14
ACVRL1	chr12:51906912-51923361	TKS4_WT	TKS4_KO	1166.64	1513.65	1.29742	0,375643857744811	0.11308	29.7418	0.59175	0.227862	0.9999	+	ENSG00000139567.13
ACY3	chr11:67642550-67650829	TKS4_WT	TKS4_KO	119.335	46.6719	0.39161	-1,35251173398715	-0.407147	-60.839	0.37	0.431798	0.9999	-	ENSG00000132744.8
ACYP1	chr14:75053242-75069490	TKS4_WT	TKS4_KO	4458.64	3495.64	0.78402	-0,351038188444437	-0.105673	-21.598	0.604	0.218963	0.9999	-	ENSG00000119640.9
ADA	chr20:44619521-44651699	TKS4_WT	TKS4_KO	11115.4	15764.3	1.41824	0,504097415990569	0.151748	41.8236	0.3982	0.399899	0.9999	-	ENSG00000196839.14
ADAL	chr15:43323648-43354569	TKS4_WT	TKS4_KO	5054.55	3896.46	0.770886	-0,375410167390248	-0.11301	-22.9114	0.68605	0.163644	0.9999	+	ENSG00000168803.16
ADAM10	chr15:58588808-58749707	TKS4_WT	TKS4_KO	186928	158302	0.846861	-0,239803064705545	-0.0721879	-15.3139	0.66705	0.175842	0.9999	-	ENSG00000137845.15
ADAM11	chr17:44758987-44781846	TKS4_WT	TKS4_KO	9954.91	15832.4	1.59041	0,669394409132022	0.201508	59.0405	0.2946	0.530767	0.9999	+	ENSG00000073670.14
ADAM12	chr10:126012390-126388477	TKS4_WT	TKS4_KO	87.1474	84.0358	0.964336	-0,0523923376144858	-0.0157717	-3.56641	1	0	1	-	ENSG00000148848.15
ADAM15	chr1:155033805-155069553	TKS4_WT	TKS4_KO	114181	130673	1.14444	0,194638316344561	0.058592	14.4437	0.7446	0.128077	0.9999	+	ENSG00000143537.14
ADAM17	chr2:9474531-9555830	TKS4_WT	TKS4_KO	60533.1	62829.8	1.03794	0,0537246648448451	0.0161727	3.79412	0.92135	0.0355754	0.9999	-	ENSG00000151694.14
ADAM19	chr5:157477303-157575775	TKS4_WT	TKS4_KO	52234.5	111186	2.12859	1,08989877565926	0.328092	112.859	0.08005	1.09664	0.9999	-	ENSG00000135074.16
ADAM1A	chr12:111839766-112013219	TKS4_WT	TKS4_KO	61055.8	49293.4	0.80735	-0,308733292828953	-0.092938	-19.265	0.6653	0.176982	0.9999
ADAM20	chr14:70520816-70564742	TKS4_WT	TKS4_KO	6093.03	8258.11	1.35533	0,438645584308763	0.132045	35.5331	0.5107	0.291834	0.9999	-	ENSG00000134007.5
ADAM21	chr14:70452173-70459905	TKS4_WT	TKS4_KO	2864.91	2414.1	0.84265	-0,24699497607249	-0.0743529	-15.735	0.7321	0.13543	0.9999	+	ENSG00000139985.8
ADAM22	chr7:87934162-88202889	TKS4_WT	TKS4_KO	23911.8	22853.6	0.955746	-0,0653010131300382	-0.0196576	-4.42541	0.90835	0.0417468	0.9999	+	ENSG00000008277.15
ADAM23	chr2:206443531-206621127	TKS4_WT	TKS4_KO	32.188	0	0.00309713	-8,33485426933163	-2.50904	-99.6903	1	0	1	+	ENSG00000114948.13
ADAM28	chr8:24294039-24548618	TKS4_WT	TKS4_KO	128.752	0	0.000776084	-10,3314992150896	-3.11009	-99.9224	1	0	1	+	ENSG00000042980.13
ADAM32	chr8:39107528-39284917	TKS4_WT	TKS4_KO	2601.07	3340.87	1.28441	0,361106338161548	0.108704	28.441	0.6367	0.196065	0.9999	+	ENSG00000197140.15
ADAM33	chr20:3667964-3682108	TKS4_WT	TKS4_KO	32.188	23.336	0.725842	-0,46227172449841	-0.139158	-27.4158	1	0	1	-	ENSG00000149451.19
ADAM8	chr10:133262421-133276891	TKS4_WT	TKS4_KO	1239.67	1736.8	1.40099	0,486442195817246	0.146434	40.0986	0.514	0.289037	0.9999	-	ENSG00000151651.16
ADAM9	chr8:38988807-39105261	TKS4_WT	TKS4_KO	226711	256332	1.13066	0,177159127417605	0.0533302	13.0655	0.7746	0.110923	0.9999	+	ENSG00000168615.13
ADAMTS10	chr19:8580239-8610715	TKS4_WT	TKS4_KO	1948.57	5152.95	2.64439	1,402936794763	0.422326	164.439	0.07845	1.10541	0.9999	-	ENSG00000142303.14
ADAMTS13	chr9:133361448-133459403	TKS4_WT	TKS4_KO	3060.26	7622.32	2.49069	1,3165477319556	0.39632	149.069	0.34095	0.467309	0.9999	+	ENSG00000160323.19
ADAMTS14	chr10:70672505-70762441	TKS4_WT	TKS4_KO	15488.3	20550.7	1.32685	0,408006439194394	0.122822	32.6851	0.513	0.289883	0.9999	+	ENSG00000138316.11
ADAMTS15	chr11:130448644-130478215	TKS4_WT	TKS4_KO	1599.21	1525.45	0.95388	-0,0681201435691273	-0.0205062	-4.61199	0.92985	0.0315871	0.9999	+	ENSG00000166106.4
ADAMTS16	chr5:5140329-5422391	TKS4_WT	TKS4_KO	1187.87	2394.6	2.01579	1,01134652729033	0.304446	101.579	0.32285	0.490999	0.9999	+	ENSG00000145536.15
ADAMTS17	chr15:99971436-100342924	TKS4_WT	TKS4_KO	8877.04	11123	1.253	0,325392067110354	0.0979528	25.3005	0.6425	0.192127	0.9999	-	ENSG00000140470.15
ADAMTS2	chr5:179110852-179345461	TKS4_WT	TKS4_KO	3488.89	6600.63	1.89187	0,919816123917247	0.276892	89.1874	0.225	0.647817	0.9999	-	ENSG00000087116.16
ADAMTS6	chr5:65148735-65482663	TKS4_WT	TKS4_KO	1326.04	1660.83	1.25245	0,324758183954299	0.097762	25.2454	0.63755	0.195486	0.9999	-	ENSG00000049192.15
ADAMTS7	chr15:78759202-78811476	TKS4_WT	TKS4_KO	11817	22074.2	1.868	0,90149165779974	0.271376	86.7996	0.20585	0.686449	0.9999	-	ENSG00000136378.15
ADAMTSL4	chr1:150548563-150579738	TKS4_WT	TKS4_KO	1406.86	2331.35	1.65708	0,728646176935908	0.219344	65.7083	0.66585	0.176624	0.9999	+	ENSG00000143382.16
ADAMTSL5	chr19:1505017-1513038	TKS4_WT	TKS4_KO	7915.34	8336.51	1.05321	0,0747912967586681	0.0225144	5.32087	0.9035	0.0440718	0.9999	-	ENSG00000185761.11
ADAP1	chr7:897899-955407	TKS4_WT	TKS4_KO	18047.1	23549.5	1.30489	0,383927533071863	0.115574	30.4889	0.46935	0.328503	0.9999	-	ENSG00000105963.15
ADAP2	chr17:30921903-30959398	TKS4_WT	TKS4_KO	16803.7	16622.5	0.989217	-0,0156414631605545	-0.00470855	-1.07833	0.9801	0.00872961	0.9999	+	ENSG00000184060.11
ADAR	chr1:154567777-154627997	TKS4_WT	TKS4_KO	336609	347826	1.03332	0,0472920134489038	0.0142363	3.33235	0.9329	0.0301649	0.9999	-	ENSG00000160710.18
ADARB1	chr21:45074577-45226563	TKS4_WT	TKS4_KO	20641.7	22120.3	1.07163	0,0998086921513702	0.0300454	7.16313	0.8832	0.0539409	0.9999	+	ENSG00000197381.17
ADAT1	chr16:75596867-75623281	TKS4_WT	TKS4_KO	29756.3	25873.4	0.86951	-0,201724770635519	-0.0607252	-13.049	0.72615	0.138974	0.9999	-	ENSG00000065457.11
ADAT2	chr6:143422831-143450750	TKS4_WT	TKS4_KO	35288.1	38666.4	1.09573	0,131898338783756	0.0397054	9.57346	0.81285	0.0899896	0.9999	-	ENSG00000189007.16
ADCK1	chr14:77800063-77935014	TKS4_WT	TKS4_KO	4571.64	7543.61	1.65007	0,722530857902945	0.217503	65.0074	0.2556	0.592439	0.9999	+	ENSG00000063761.16
ADCK2	chr7:140672894-140695114	TKS4_WT	TKS4_KO	15370.8	15622.3	1.01636	0,0234144648749799	0.00704846	1.63621	0.9685	0.0139004	0.9999	+	ENSG00000133597.11
ADCK5	chr8:144373761-144409400	TKS4_WT	TKS4_KO	11079.3	11939.3	1.07762	0,107850582551329	0.0324663	7.76215	0.921	0.0357404	0.9999	+	ENSG00000173137.12
ADCY10	chr1:167809079-167916389	TKS4_WT	TKS4_KO	706.595	414.081	0.586082	-0,770826328331128	-0.232042	-41.3918	0.40475	0.392813	0.9999	-	ENSG00000143199.18
ADCY3	chr2:24789727-24920237	TKS4_WT	TKS4_KO	57417.8	56535.5	0.984634	-0,0223409596260277	-0.0067253	-1.53663	0.9833	0.00731396	0.9999	-	ENSG00000138031.15
ADCY4	chr14:24318358-24335071	TKS4_WT	TKS4_KO	59.6677	67.6214	1.13308	0,180245772706872	0.0542594	13.3077	0.87665	0.0571738	0.9999	-	ENSG00000129467.14
ADCY5	chr3:123282295-123449090	TKS4_WT	TKS4_KO	270.859	320.737	1.18408	0,243765960271795	0.0733809	18.408	0.7279	0.137928	0.9999	-	ENSG00000173175.15
ADCY6	chr12:48727406-48789089	TKS4_WT	TKS4_KO	23617.8	29576.5	1.2523	0,324575523562568	0.097707	25.2296	0.5918	0.227825	0.9999	-	ENSG00000174233.12
ADCY7	chr16:50246137-50368988	TKS4_WT	TKS4_KO	28732.2	41684.9	1.45081	0,536854851063723	0.161609	45.0806	0.70795	0.149997	0.9999	+	ENSG00000121281.13
ADCY9	chr16:3953386-4116442	TKS4_WT	TKS4_KO	24689.4	30336.2	1.22871	0,297147516433108	0.0894503	22.8713	0.6233	0.205303	0.9999	-	ENSG00000162104.10
ADCYAP1R1	chr7:31052307-31124016	TKS4_WT	TKS4_KO	151.523	206.444	1.36222	0,445960535790326	0.134247	36.2221	0.5755	0.239955	0.9999	+	ENSG00000078549.15
ADD1	chr4:2843843-2930075	TKS4_WT	TKS4_KO	107660	120243	1.11688	0,159470438602102	0.0480054	11.6877	0.76285	0.117561	0.9999	+	ENSG00000087274.19
ADD2	chr2:70656783-70768200	TKS4_WT	TKS4_KO	160.94	67.6214	0.420525	-1,24973537397874	-0.376208	-57.9475	1	0	1	-	ENSG00000075340.23
ADD3	chr10:109945558-110135565	TKS4_WT	TKS4_KO	68271.3	62483.5	0.915224	-0,127803759729792	-0.0384728	-8.47763	0.81025	0.091381	0.9999	+	ENSG00000148700.15
ADGRA2	chr8:37796882-37849861	TKS4_WT	TKS4_KO	12283.4	18279.5	1.48814	0,57351280752692	0.172645	48.8143	0.62435	0.204572	0.9999	+	ENSG00000020181.18
ADGRA3	chr4:22387375-22516066	TKS4_WT	TKS4_KO	102503	98367.9	0.959659	-0,0594065665450291	-0.0178832	-4.03412	0.91485	0.0386501	0.9999	-	ENSG00000152990.14
ADGRB1	chr8:142449648-142545009	TKS4_WT	TKS4_KO	2192.72	4468.63	2.03789	1,0270774882571	0.309181	103.789	0.19825	0.702787	0.9999	+	ENSG00000181790.12
ADGRB2	chr1:31727104-31764340	TKS4_WT	TKS4_KO	13685.6	14661.7	1.07132	0,0993930031847262	0.0299203	7.13226	0.885	0.0530567	0.9999	-	ENSG00000121753.13
ADGRD1	chr12:130953906-131141469	TKS4_WT	TKS4_KO	124.044	572.845	4.61516	2,20638211740592	0.664187	361.516	0.14715	0.83224	0.9999	+	ENSG00000111452.13
ADGRD2	chr9:124447030-124477795	TKS4_WT	TKS4_KO	128.752	344.073	2.67107	1,41741899352242	0.426686	167.107	1	0	1	+	ENSG00000180264.12
ADGRE1	chr19:6887548-6940450	TKS4_WT	TKS4_KO	87.1474	23.336	0.268615	-1,89638578413776	-0.570869	-73.1385	1	0	1	+	ENSG00000174837.15
ADGRE2	chr19:14689786-14778560	TKS4_WT	TKS4_KO	12928.9	15618.7	1.20804	0,272672921285513	0.0820827	20.8044	0.6797	0.167683	0.9999	-	ENSG00000127507.18
ADGRE5	chr19:14381143-14408725	TKS4_WT	TKS4_KO	57826	78152	1.3515	0,434563835077193	0.130817	35.1502	0.4718	0.326242	0.9999	+	ENSG00000123146.20
ADGRF1	chr6:46997707-47042350	TKS4_WT	TKS4_KO	58221.4	46841.5	0.804541	-0,313761653285998	-0.0944517	-19.5459	0.5845	0.233215	0.9999	-	ENSG00000153292.16
ADGRF3	chr2:26299048-26395885	TKS4_WT	TKS4_KO	206.483	231.158	1.11944	0,162781736492912	0.0490022	11.9444	0.9274	0.0327329	0.9999	-	ENSG00000173567.16
ADGRG4	chrX:136300962-136416890	TKS4_WT	TKS4_KO	27.4797	46.6719	1.69588	0,762035272161415	0.229395	69.5881	1	0	1	+	ENSG00000156920.11
ADGRG5	chr16:57512177-57607366	TKS4_WT	TKS4_KO	4376.11	5780.95	1.32102	0,401649580196479	0.120909	32.1018	0.65495	0.183792	0.9999	+	ENSG00000159618.16
ADGRG6	chr6:142302006-142446266	TKS4_WT	TKS4_KO	199419	193304	0.969336	-0,0449313574852319	-0.0135257	-3.06641	0.93585	0.0287938	0.9999	+	ENSG00000112414.15
ADGRG7	chr3:100609600-100696174	TKS4_WT	TKS4_KO	59.6677	17.6076	0.296274	-1,75499733594176	-0.528307	-70.3726	0.3458	0.461175	0.9999	+	ENSG00000144820.8
ADGRL1	chr19:14137151-14206245	TKS4_WT	TKS4_KO	113638	138014	1.21451	0,280369049921865	0.0843995	21.4506	0.67575	0.170214	0.9999	-	ENSG00000072071.17
ADGRL2	chr1:81306103-81993932	TKS4_WT	TKS4_KO	32.188	0	0.00309713	-8,33485426933163	-2.50904	-99.6903	1	0	1	+	ENSG00000117114.21
ADGRL4	chr1:78889763-79006730	TKS4_WT	TKS4_KO	64.376	0	0.00155096	-9,33261843365355	-2.8094	-99.8449	1	0	1	-	ENSG00000162618.15
ADGRV1	chr5:90558795-91207669	TKS4_WT	TKS4_KO	18701	22560.1	1.20636	0,2706567254985	0.0814758	20.6357	0.62875	0.201522	0.9999	+	ENSG00000164199.18
ADH5	chr4:99070977-99088788	TKS4_WT	TKS4_KO	228157	174887	0.766521	-0,383603672281412	-0.115476	-23.3479	0.60145	0.2208	0.9999	-	ENSG00000197894.12
ADHFE1	chr8:66432503-66468907	TKS4_WT	TKS4_KO	146.815	457.909	3.11751	1,64039424557937	0.493808	211.751	0.1578	0.801893	0.9999	+	ENSG00000147576.17
ADI1	chr2:3497365-3519531	TKS4_WT	TKS4_KO	66432.1	47235	0.711027	-0,492023379691992	-0.148114	-28.8973	0.4136	0.383419	0.9999	-	ENSG00000182551.14
ADIG	chr20:38581196-38588463	TKS4_WT	TKS4_KO	32.188	0	0.00309713	-8,33485426933163	-2.50904	-99.6903	1	0	1	+	ENSG00000182035.13
ADIPOR1	chr1:202940824-202958572	TKS4_WT	TKS4_KO	126772	116808	0.921402	-0,118096951467251	-0.0355507	-7.85977	0.8324	0.0796679	0.9999	-	ENSG00000159346.13
ADIPOR2	chr12:1691058-1788674	TKS4_WT	TKS4_KO	126249	121575	0.962978	-0,0544253250221315	-0.0163837	-3.7022	0.91075	0.0406008	0.9999	+	ENSG00000006831.10
ADIRF	chr10:86965286-87010226	TKS4_WT	TKS4_KO	87737	78409.6	0.893689	-0,162154881317469	-0.0488135	-10.6311	0.80635	0.0934764	0.9999
ADK	chr10:74151184-74709303	TKS4_WT	TKS4_KO	81361.3	80590.5	0.990526	-0,0137329299332633	-0.00413402	-0.947378	0.9799	0.00881824	0.9999
ADM	chr11:10305072-10307397	TKS4_WT	TKS4_KO	43940.2	33053.5	0.752239	-0,410737309729232	-0.123644	-24.7761	0.41895	0.377838	0.9999	+	ENSG00000148926.10
ADNP	chr20:50888917-50958564	TKS4_WT	TKS4_KO	202434	196964	0.972979	-0,039519633957502	-0.0118966	-2.70211	0.95575	0.0196557	0.9999	-	ENSG00000101126.18
ADNP2	chr18:80109250-80140346	TKS4_WT	TKS4_KO	133264	136230	1.02226	0,0317573162884637	0.0095599	2.22566	0.9528	0.0209983	0.9999	+	ENSG00000101544.9
ADO	chr10:62804719-62808479	TKS4_WT	TKS4_KO	57777.2	56605.3	0.979717	-0,0295630978965771	-0.00889938	-2.02831	0.9509	0.0218652	0.9999	+	ENSG00000181915.5
ADORA1	chr1:203127704-203167405	TKS4_WT	TKS4_KO	3403.37	3203.36	0.941234	-0,0873754166993319	-0.0263026	-5.87665	0.90235	0.044625	0.9999	+	ENSG00000163485.17
ADORA2A	chr22:24270816-24528681	TKS4_WT	TKS4_KO	84439.8	55308.8	0.655009	-0,61041322055221	-0.183753	-34.4991	0.29085	0.536331	0.9999
ADORA2B	chr17:15927781-15975746	TKS4_WT	TKS4_KO	65103.8	76687.2	1.17792	0,236243706703479	0.0711164	17.7922	0.6703	0.173731	0.9999	+	ENSG00000170425.4
ADPGK	chr15:72751293-72798199	TKS4_WT	TKS4_KO	78347.4	59561.4	0.760222	-0,395507153012503	-0.11906	-23.9778	0.5457	0.263046	0.9999	-	ENSG00000159322.18
ADPRH	chr3:119579491-119589945	TKS4_WT	TKS4_KO	1661.28	2316.48	1.39437	0,479614412566964	0.144378	39.4371	0.56445	0.248375	0.9999	+	ENSG00000144843.12
ADPRHL1	chr13:113421944-113453488	TKS4_WT	TKS4_KO	6304.4	9447.09	1.49848	0,583503316469972	0.175652	49.8484	0.3379	0.471212	0.9999	-	ENSG00000153531.15
ADPRM	chr17:10697593-10815164	TKS4_WT	TKS4_KO	3090.13	3956.69	1.28042	0,356616279519145	0.107352	28.0419	0.63295	0.198631	0.9999	+	ENSG00000170222.12
ADPRS	chr1:36088884-36093932	TKS4_WT	TKS4_KO	27555.9	24020.6	0.871705	-0,198088289144415	-0.0596305	-12.8295	0.7035	0.152736	0.9999	+	ENSG00000116863.11
ADRA1A	chr8:26738112-26870994	TKS4_WT	TKS4_KO	64.376	0	0.00155096	-9,33261843365355	-2.8094	-99.8449	1	0	1	-	ENSG00000120907.18
ADRA1B	chr5:159916481-159989205	TKS4_WT	TKS4_KO	344.651	44.2855	0.128747	-2,95739438215995	-0.890264	-87.1253	0.27385	0.562487	0.9999	+	ENSG00000170214.5
ADRA1D	chr20:4220629-4249287	TKS4_WT	TKS4_KO	64.376	88.5709	1.37525	0,459698474922274	0.138383	37.5254	1	0	1	-	ENSG00000171873.8
ADRA2A	chr10:111077028-111080907	TKS4_WT	TKS4_KO	555.842	314.771	0.566374	-0,820173488500501	-0.246897	-43.3626	0.48495	0.314303	0.9999	+	ENSG00000150594.7
ADRA2B	chr2:96112875-96116571	TKS4_WT	TKS4_KO	1139.93	1480.98	1.29916	0,377577779832308	0.113662	29.9159	0.67905	0.168098	0.9999	-	ENSG00000274286.2
ADRA2C	chr4:3766384-3768526	TKS4_WT	TKS4_KO	22225.5	29577.1	1.33077	0,412263116121083	0.124104	33.0772	0.41025	0.386951	0.9999	+	ENSG00000184160.8
ADRB1	chr10:114043865-114046904	TKS4_WT	TKS4_KO	1773.51	1817.73	1.02493	0,0355284781772163	0.0106951	2.49322	0.96635	0.0148655	0.9999	+	ENSG00000043591.6
ADRB2	chr5:148826610-148828623	TKS4_WT	TKS4_KO	881.66	1308.53	1.48411	0,569599312201818	0.171466	48.4111	0.5104	0.292089	0.9999	+	ENSG00000169252.6
ADRM1	chr20:62302060-62308862	TKS4_WT	TKS4_KO	165366	129133	0.780892	-0,356804666390636	-0.107409	-21.9108	0.5738	0.241239	0.9999	+	ENSG00000130706.13
ADSL	chr22:40346499-40636719	TKS4_WT	TKS4_KO	91116	90999.8	0.998725	-0,00184103743219692	-0.000554207	-0.12753	0.99845	0.000673679	0.9999	+	ENSG00000239900.14
ADSS1	chr14:104724200-104747325	TKS4_WT	TKS4_KO	1822.99	4579.52	2.51201	1,32884210948957	0.400021	151.201	0.10935	0.961181	0.9999	+	ENSG00000185100.11
ADSS2	chr1:244408491-244640504	TKS4_WT	TKS4_KO	53172.3	63558.5	1.19533	0,257409761252555	0.0774881	19.5331	0.6562	0.182964	0.9999	-	ENSG00000035687.10
AEBP1	chr7:44104319-44114564	TKS4_WT	TKS4_KO	32.188	22.1427	0.688884	-0,537666154796718	-0.161854	-31.1116	1	0	1	+	ENSG00000106624.11
AEBP2	chr12:19404100-19522227	TKS4_WT	TKS4_KO	54935.5	45394.1	0.826317	-0,275233387454048	-0.0828535	-17.3683	0.6382	0.195043	0.9999	+	ENSG00000139154.16
AEN	chr15:88585570-88632281	TKS4_WT	TKS4_KO	104376	91635	0.877932	-0,187819181313192	-0.0565392	-12.2068	0.7427	0.129187	0.9999
AFAP1	chr4:7754089-7940296	TKS4_WT	TKS4_KO	45357	50855.1	1.12122	0,165066897238587	0.0496901	12.1218	0.76655	0.11546	0.9999	-	ENSG00000196526.11
AFAP1L1	chr5:149271858-149343637	TKS4_WT	TKS4_KO	7957.8	8211.65	1.0319	0,0453019363935167	0.0136372	3.18991	0.9421	0.025903	0.9999	+	ENSG00000157510.14
AFAP1L2	chr10:114239253-114404672	TKS4_WT	TKS4_KO	583.322	1744.44	2.99019	1,58023498268661	0.475698	199.019	0.00085	3.07058	0.168855	-	ENSG00000169129.16
AFDN	chr6:167823889-167972023	TKS4_WT	TKS4_KO	96843.6	85134.9	0.879097	-0,185905837077206	-0.0559632	-12.0903	0.76645	0.115516	0.9999	+	ENSG00000130396.21
AFF1	chr4:86924893-87141054	TKS4_WT	TKS4_KO	82506.5	82930.5	1.00514	0,00739499987503022	0.00222612	0.513898	0.9895	0.0045842	0.9999	+	ENSG00000172493.23
AFF3	chr2:99545418-100142590	TKS4_WT	TKS4_KO	27.4797	46.6719	1.69588	0,762035272161415	0.229395	69.5881	1	0	1	-	ENSG00000144218.21
AFF4	chr5:132875380-132963655	TKS4_WT	TKS4_KO	126801	115247	0.908881	-0,137836812806211	-0.041493	-9.11191	0.80415	0.0946629	0.9999	-	ENSG00000072364.13
AFG1L	chr6:108294880-108526001	TKS4_WT	TKS4_KO	4895.92	4412.85	0.901334	-0,149866050126251	-0.0451142	-9.86659	0.83645	0.07756	0.9999
AFG3L2	chr18:12307668-12377309	TKS4_WT	TKS4_KO	127925	105425	0.824116	-0,27908097104113	-0.0840117	-17.5884	0.75145	0.1241	0.9999	-	ENSG00000141385.12
AFMID	chr17:78174078-78207702	TKS4_WT	TKS4_KO	14000.8	14718.8	1.05128	0,0721502884046337	0.0217194	5.12824	0.9491	0.022688	0.9999	+	ENSG00000183077.16
AFTPH	chr2:64518208-64607248	TKS4_WT	TKS4_KO	47290.3	44493.4	0.940857	-0,0879527547541314	-0.0264764	-5.91431	0.86845	0.0612552	0.9999	+	ENSG00000119844.17
AGA	chr4:177430773-177442469	TKS4_WT	TKS4_KO	5439.26	3715.27	0.683053	-0,54993102206417	-0.165546	-31.6947	0.41905	0.377734	0.9999	-	ENSG00000038002.9
AGAP1	chr2:235494042-236131795	TKS4_WT	TKS4_KO	96413.2	107170	1.11157	0,152598374317901	0.0459367	11.157	0.7844	0.105462	0.9999	+	ENSG00000157985.19
AGAP2	chr12:57723760-57742201	TKS4_WT	TKS4_KO	16693.3	22839.1	1.36816	0,452234294490622	0.136136	36.8157	0.6788	0.168258	0.9999	-	ENSG00000135439.12
AGAP3	chr7:151085866-151144435	TKS4_WT	TKS4_KO	47014.3	58437.3	1.24297	0,313789284807721	0.09446	24.2968	0.63235	0.199042	0.9999	+	ENSG00000133612.19
AGAP6	chr10:49942052-50010516	TKS4_WT	TKS4_KO	29986.2	27506.6	0.917309	-0,124520450707371	-0.0374844	-8.26911	0.8393	0.0760828	0.9999
AGBL2	chr11:47659167-47715382	TKS4_WT	TKS4_KO	142.107	45.4787	0.32051	-1,6415608003346	-0.494159	-67.949	1	0	1	-	ENSG00000165923.17
AGBL3	chr7:134986138-135170826	TKS4_WT	TKS4_KO	2924.57	1878.75	0.642414	-0,63842395766608	-0.192185	-35.7586	0.47585	0.32253	0.9999	+	ENSG00000146856.14
AGBL5	chr2:27051422-27071654	TKS4_WT	TKS4_KO	26023.8	31510.8	1.21084	0,276013776772556	0.0830884	21.0845	0.8589	0.0660574	0.9999	+	ENSG00000084693.16
AGER	chr6:32180967-32184380	TKS4_WT	TKS4_KO	1689.53	2524.44	1.49414	0,579313180693684	0.174391	49.4138	0.34235	0.46553	0.9999	-	ENSG00000204305.16
AGFG1	chr2:227472131-227561217	TKS4_WT	TKS4_KO	134276	104524	0.778427	-0,36136691903348	-0.108782	-22.1573	0.55565	0.255199	0.9999
AGFG2	chr7:100539202-100568220	TKS4_WT	TKS4_KO	18958.4	24697.4	1.30271	0,381520190199299	0.114849	30.2714	0.5589	0.252666	0.9999	+	ENSG00000106351.13
AGGF1	chr5:77030403-77065234	TKS4_WT	TKS4_KO	47231.6	45881.2	0.971409	-0,0418491937920593	-0.0125979	-2.8591	0.9324	0.0303977	0.9999	+	ENSG00000164252.13
AGK	chr7:141551409-141702188	TKS4_WT	TKS4_KO	56059	44388.9	0.791825	-0,336746374984474	-0.101371	-20.8175	0.78575	0.104716	0.9999	+	ENSG00000006530.18
AGL	chr1:99850076-99924023	TKS4_WT	TKS4_KO	98679.9	69754.5	0.706877	-0,500469356354087	-0.150656	-29.3123	0.36095	0.442553	0.9999	+	ENSG00000162688.17
AGMAT	chr1:15526693-15585051	TKS4_WT	TKS4_KO	54.9594	23.336	0.425649	-1,23226253344851	-0.370948	-57.4351	1	0	1	-	ENSG00000116771.6
AGO1	chr1:35869760-36072500	TKS4_WT	TKS4_KO	245133	234170	0.955277	-0,0660084254323904	-0.0198705	-4.47226	0.92115	0.0356696	0.9999
AGO2	chr8:140520155-140642406	TKS4_WT	TKS4_KO	383683	364664	0.95043	-0,0733470422794256	-0.0220797	-4.95696	0.90395	0.0438556	0.9999	-	ENSG00000123908.12
AGO4	chr1:35807629-35857890	TKS4_WT	TKS4_KO	15421.7	16925.9	1.09754	0,134269908351399	0.0404193	9.75373	0.84125	0.0750749	0.9999	+	ENSG00000134698.11
AGPAT2	chr9:136673142-136687457	TKS4_WT	TKS4_KO	46617.9	46975.5	1.00767	0,0110244772528264	0.0033187	0.767086	0.98545	0.00636541	0.9999	-	ENSG00000169692.13
AGPAT3	chr21:43865159-43987592	TKS4_WT	TKS4_KO	53349.7	71304.7	1.33655	0,418516334706594	0.125986	33.6552	0.45325	0.343662	0.9999	+	ENSG00000160216.21
AGPAT4	chr6:161129966-161274108	TKS4_WT	TKS4_KO	16389.6	20814.6	1.26999	0,34481331789076	0.103799	26.9987	0.5972	0.22388	0.9999	-	ENSG00000026652.15
AGPAT5	chr8:6708586-6761503	TKS4_WT	TKS4_KO	156910	125436	0.799414	-0,322985609117502	-0.0972284	-20.0586	0.5824	0.234779	0.9999	+	ENSG00000155189.12
AGPS	chr2:177392772-177543834	TKS4_WT	TKS4_KO	108886	90849.1	0.834351	-0,261274081111479	-0.0786513	-16.5649	0.6255	0.203773	0.9999	+	ENSG00000018510.18
AGRN	chr1:1020101-1056119	TKS4_WT	TKS4_KO	83384.1	103487	1.24109	0,311604995790403	0.0938025	24.1088	0.60135	0.220873	0.9999	+	ENSG00000188157.15
AGTPBP1	chr9:85546538-85742029	TKS4_WT	TKS4_KO	40371.8	42402.3	1.05029	0,0707944393001933	0.0213112	5.02949	0.89365	0.0488325	0.9999	-	ENSG00000135049.16
AGTRAP	chr1:11736120-11750771	TKS4_WT	TKS4_KO	20504.4	22759.8	1.11	0,150553654767603	0.0453212	10.9995	0.7738	0.111371	0.9999	+	ENSG00000177674.16
AHCTF1	chr1:246839097-246931948	TKS4_WT	TKS4_KO	254722	229783	0.902093	-0,148651439923415	-0.0447485	-9.79067	0.7983	0.0978339	0.9999	-	ENSG00000153207.16
AHCY	chr20:34186492-34311976	TKS4_WT	TKS4_KO	266533	315060	1.18207	0,241312351039902	0.0726423	18.2067	0.6898	0.161277	0.9999	-	ENSG00000101444.13
AHCYL1	chr1:109984764-110023742	TKS4_WT	TKS4_KO	117821	152809	1.29696	0,37513253303177	0.112926	29.6959	0.50795	0.294179	0.9999	+	ENSG00000168710.18
AHCYL2	chr7:129225029-129430211	TKS4_WT	TKS4_KO	29935.3	35439.1	1.18386	0,243493489231727	0.0732988	18.3856	0.68225	0.166056	0.9999	+	ENSG00000158467.17
AHDC1	chr1:27534244-27604178	TKS4_WT	TKS4_KO	44730.6	55639.2	1.24387	0,31483893384399	0.094776	24.3873	0.64065	0.193379	0.9999	-	ENSG00000126705.15
AHI1	chr6:135283531-135497771	TKS4_WT	TKS4_KO	49872.3	43369.9	0.869619	-0,201544188011054	-0.0606708	-13.0381	0.7403	0.130592	0.9999	-	ENSG00000135541.22
AHNAK	chr11:62433543-62546806	TKS4_WT	TKS4_KO	1180490	1501150	1.27163	0,346682296574114	0.104362	27.1633	0.66445	0.177538	0.9999	-	ENSG00000124942.14
AHNAK2	chr14:104924300-104978374	TKS4_WT	TKS4_KO	124330	263387	2.11845	1,08300907649189	0.326018	111.845	0.19235	0.715908	0.9999	-	ENSG00000185567.7
AHR	chr7:17298651-17346147	TKS4_WT	TKS4_KO	79165	66015.9	0.833903	-0,26204883081471	-0.0788846	-16.6097	0.60665	0.217062	0.9999	+	ENSG00000106546.14
AHRR	chr5:271645-438290	TKS4_WT	TKS4_KO	96346.3	80004	0.83038	-0,268156824750612	-0.0807232	-16.962	0.6548	0.183891	0.9999
AHSA1	chr14:77457866-77469472	TKS4_WT	TKS4_KO	156872	120643	0.769054	-0,378843383927922	-0.114043	-23.0946	0.5569	0.254223	0.9999	+	ENSG00000100591.8
AIDA	chr1:222668012-222735196	TKS4_WT	TKS4_KO	54526.8	47653.1	0.873939	-0,1943950397068	-0.0585187	-12.6061	0.8156	0.0885228	0.9999	-	ENSG00000186063.13
AIF1L	chr9:131096530-131123144	TKS4_WT	TKS4_KO	65108	61798.1	0.949163	-0,0752722207852208	-0.0226592	-5.0837	0.88575	0.0526888	0.9999	+	ENSG00000126878.13
AIFM1	chrX:130063954-130184873	TKS4_WT	TKS4_KO	32145	31002.5	0.964458	-0,0522096281591725	-0.0157167	-3.5542	0.94035	0.0267105	0.9999	-	ENSG00000156709.15
AIFM2	chr10:70052845-70132825	TKS4_WT	TKS4_KO	30393.7	27012.8	0.888763	-0,17012852950762	-0.0512138	-11.1237	0.8226	0.0848113	0.9999	-	ENSG00000042286.15
AIFM3	chr22:20965171-20981358	TKS4_WT	TKS4_KO	767.033	1161.5	1.51421	0,598564729834627	0.180186	51.4209	0.6091	0.215311	0.9999	+	ENSG00000183773.16
AIMP1	chr4:106041598-106349456	TKS4_WT	TKS4_KO	48785.1	43119.9	0.883875	-0,178086364676308	-0.0536093	-11.6125	0.7902	0.102263	0.9999	+	ENSG00000164022.18
AIMP2	chr7:6009271-6059175	TKS4_WT	TKS4_KO	55534.7	49050	0.883232	-0,179136019040749	-0.0539253	-11.6768	0.9116	0.0401957	0.9999	+	ENSG00000106305.10
AIP	chr11:67451300-67491108	TKS4_WT	TKS4_KO	25362.1	32797.6	1.29317	0,370914751723423	0.111656	29.3173	0.5362	0.270673	0.9999	+	ENSG00000110711.11
AJAP1	chr1:4654608-4792534	TKS4_WT	TKS4_KO	27.4797	0	0.00362586	-8,10746295370181	-2.44059	-99.6374	1	0	1	+	ENSG00000196581.11
AJM1	chr9:136842477-136847345	TKS4_WT	TKS4_KO	2128.35	3287.06	1.54439	0,627038480430839	0.188757	54.4391	0.4317	0.364818	0.9999	+	ENSG00000232434.3
AJUBA	chr14:22971176-22982551	TKS4_WT	TKS4_KO	42128.5	44555.5	1.05761	0,0808067955627454	0.0243253	5.76093	0.87015	0.0604059	0.9999	-	ENSG00000129474.16
AK2	chr1:33007939-33036883	TKS4_WT	TKS4_KO	222466	218497	0.982159	-0,0259713792631184	-0.00781816	-1.78409	0.96615	0.0149554	0.9999	-	ENSG00000004455.18
AK3	chr9:4709555-4742043	TKS4_WT	TKS4_KO	53173.8	50874.7	0.956763	-0,0637670658527955	-0.0191958	-4.32374	0.90645	0.0426561	0.9999	-	ENSG00000147853.17
AK4	chr1:65147341-65232145	TKS4_WT	TKS4_KO	84751.6	79380.4	0.936624	-0,094457657394834	-0.0284346	-6.33757	0.86825	0.0613552	0.9999	+	ENSG00000162433.15
AK4P3	chr12:31382222-31616583	TKS4_WT	TKS4_KO	610.031	558.707	0.91588	-0,126768941036147	-0.0381613	-8.41196	0.93845	0.0275889	0.9999	-	ENSG00000233381.4
AK5	chr1:77281907-77559966	TKS4_WT	TKS4_KO	142.107	152.85	1.07554	0,105067624943507	0.0316285	7.55448	0.88415	0.053474	0.9999	+	ENSG00000154027.19
AK6	chr5:69350983-69414801	TKS4_WT	TKS4_KO	132974	94582.6	0.711287	-0,491497041178057	-0.147955	-28.8713	0.5271	0.278107	0.9999
AK7	chr14:96392110-96489427	TKS4_WT	TKS4_KO	1258.5	1983.24	1.57583	0,656112169063768	0.197509	57.583	0.39995	0.397994	0.9999	+	ENSG00000140057.9
AK8	chr9:132725573-132890314	TKS4_WT	TKS4_KO	830.639	1077.35	1.29698	0,37515373124516	0.112933	29.6978	0.6384	0.194907	0.9999	-	ENSG00000165695.10
AK9	chr6:109444061-109691202	TKS4_WT	TKS4_KO	2404	2060.72	0.857211	-0,222278407266079	-0.0669125	-14.2789	0.7708	0.113058	0.9999	-	ENSG00000155085.16
AKAP1	chr17:57085245-57121344	TKS4_WT	TKS4_KO	76899.6	83171.7	1.08156	0,113116485114413	0.0340515	8.15621	0.834	0.0788339	0.9999	+	ENSG00000121057.13
AKAP10	chr17:19904301-19977828	TKS4_WT	TKS4_KO	36981.6	34807.8	0.94122	-0,0873967677931976	-0.026309	-5.87804	0.8636	0.0636874	0.9999	-	ENSG00000108599.15
AKAP11	chr13:42271469-42323266	TKS4_WT	TKS4_KO	120180	69526.1	0.578517	-0,789569382074127	-0.237684	-42.1483	0.1724	0.763463	0.9999	+	ENSG00000023516.9
AKAP12	chr6:151239814-151358559	TKS4_WT	TKS4_KO	2254640	1984710	0.880278	-0,183968866603035	-0.0553801	-11.9722	0.89485	0.0482498	0.9999	+	ENSG00000131016.17
AKAP14	chrX:119895892-119943751	TKS4_WT	TKS4_KO	164.878	0	0.000606141	-10,6880579369693	-3.21743	-99.9394	1	0	1	+	ENSG00000186471.13
AKAP3	chr12:4615507-4649051	TKS4_WT	TKS4_KO	2576.67	1993.45	0.773662	-0,370223979520507	-0.111449	-22.6338	0.6476	0.188693	0.9999	-	ENSG00000111254.8
AKAP5	chr14:64388352-64543237	TKS4_WT	TKS4_KO	2144.1	1819.54	0.848634	-0,236786425333142	-0.0712798	-15.1366	0.8828	0.0541377	0.9999	+	ENSG00000179841.8
AKAP6	chr14:32203609-32837684	TKS4_WT	TKS4_KO	5428.99	5578.15	1.02747	0,0391021928215397	0.0117709	2.74742	0.95825	0.0185212	0.9999	+	ENSG00000151320.11
AKAP7	chr6:131084991-131283534	TKS4_WT	TKS4_KO	4358.91	3709.46	0.85101	-0,23275243798034	-0.0700655	-14.899	0.6351	0.197158	0.9999	+	ENSG00000118507.18
AKAP8	chr19:15353384-15379787	TKS4_WT	TKS4_KO	44238.4	39179.4	0.885643	-0,175203482400098	-0.0527415	-11.4357	0.7268	0.138585	0.9999	-	ENSG00000105127.10
AKAP8L	chr19:15380049-15418988	TKS4_WT	TKS4_KO	33568.2	30711.6	0.914902	-0,128311103715442	-0.0386255	-8.50981	0.8183	0.0870874	0.9999	-	ENSG00000011243.19
AKAP9	chr7:91940861-92180725	TKS4_WT	TKS4_KO	92459.3	81765.7	0.884343	-0,177322464001238	-0.0533794	-11.5657	0.86255	0.0642157	0.9999	+	ENSG00000127914.19
AKIP1	chr11:8911116-8932947	TKS4_WT	TKS4_KO	13087.8	13246.4	1.01212	0,017377589764838	0.00523118	1.21181	0.97905	0.00919513	0.9999	+	ENSG00000166452.12
AKIRIN1	chr1:38991275-39006059	TKS4_WT	TKS4_KO	106088	95670	0.901799	-0,149122825480954	-0.0448904	-9.82014	0.76275	0.117618	0.9999	+	ENSG00000174574.16
AKIRIN2	chr6:87590127-87702233	TKS4_WT	TKS4_KO	25425.6	27509.6	1.08196	0,113652913044545	0.0342129	8.19643	0.9179	0.0372046	0.9999	-	ENSG00000135334.9
AKNA	chr9:114334148-114398498	TKS4_WT	TKS4_KO	15784.1	16065.2	1.01781	0,0254667801089313	0.00766626	1.78089	0.9734	0.0117087	0.9999	-	ENSG00000106948.17
AKNAD1	chr1:108813576-108858524	TKS4_WT	TKS4_KO	307.755	45.4787	0.148052	-2,75581931853033	-0.829584	-85.1948	0.1571	0.803824	0.9999	-	ENSG00000162641.20
AKR1A1	chr1:45550778-45570051	TKS4_WT	TKS4_KO	46310.5	83922.1	1.81216	0,857710049593979	0.258196	81.216	0.1247	0.904134	0.9999	+	ENSG00000117448.14
AKR1B1	chr7:134442349-134459239	TKS4_WT	TKS4_KO	38582.6	35452.8	0.918881	-0,12205046324566	-0.0367409	-8.11193	0.8192	0.0866101	0.9999	-	ENSG00000085662.14
AKR1B10	chr7:134527566-134541412	TKS4_WT	TKS4_KO	563.719	559.442	0.992414	-0,0109856697979943	-0.00330702	-0.758577	0.9872	0.00559485	0.9999	+	ENSG00000198074.10
AKR1C1	chr10:4963414-4983283	TKS4_WT	TKS4_KO	1332.29	861.123	0.646375	-0,62955767724685	-0.189516	-35.3625	0.5018	0.299469	0.9999	+	ENSG00000187134.14
AKR1C2	chr10:4987774-5018000	TKS4_WT	TKS4_KO	0	393.629	3937.29	11,9429872623746	3.5952	393629	5e-05	4.30103	0.0171564	-	ENSG00000151632.18
AKR1C3	chr10:5033066-5107686	TKS4_WT	TKS4_KO	463.987	1192.38	2.56952	1,36149787945569	0.409852	156.952	0.11705	0.931629	0.9999	+	ENSG00000196139.14
AKR1E2	chr10:4824553-4916273	TKS4_WT	TKS4_KO	2312.91	4069.2	1.75931	0,815009140489692	0.245342	75.9309	0.08385	1.0765	0.9999	+	ENSG00000165568.18
AKR7A2	chr1:19302707-19312146	TKS4_WT	TKS4_KO	61552.8	83026.6	1.34887	0,431748528336352	0.129969	34.8867	0.4443	0.352324	0.9999	-	ENSG00000053371.13
AKR7A3	chr1:19274228-19289362	TKS4_WT	TKS4_KO	1298.56	995.648	0.76675	-0,383171188654193	-0.115346	-23.325	0.69375	0.158797	0.9999	-	ENSG00000162482.5
AKT1	chr14:104747774-104795748	TKS4_WT	TKS4_KO	127238	142333	1.11864	0,161740470135189	0.0486887	11.8636	0.84445	0.0734261	0.9999	-	ENSG00000142208.18
AKT1S1	chr19:49869032-49888750	TKS4_WT	TKS4_KO	33969.9	31820.1	0.936715	-0,0943183147259849	-0.0283926	-6.32853	0.9032	0.0442161	0.9999	-	ENSG00000204673.11
AKT3	chr1:243124427-243851079	TKS4_WT	TKS4_KO	4337.68	33459.7	7.71358	2,9474000314053	0.887256	671.358	0.02465	1.60818	0.9999	-	ENSG00000117020.19
AKTIP	chr16:53434470-53504411	TKS4_WT	TKS4_KO	17161.8	15569	0.90719	-0,140523733726426	-0.0423019	-9.28102	0.9183	0.0370154	0.9999	-	ENSG00000166971.17
ALAD	chr9:113386311-113401301	TKS4_WT	TKS4_KO	10312.1	8161.89	0.791489	-0,337359301305529	-0.101555	-20.8511	0.58515	0.232733	0.9999	-	ENSG00000148218.16
ALAS1	chr3:52198082-52214327	TKS4_WT	TKS4_KO	68446.7	65151.8	0.951862	-0,0711758425319316	-0.0214261	-4.81381	0.8969	0.047256	0.9999	+	ENSG00000023330.15
ALB	chr4:73404286-73421482	TKS4_WT	TKS4_KO	91.8557	136.436	1.4848	0,570270482029585	0.171669	48.4802	0.76125	0.118473	0.9999	+	ENSG00000163631.17
ALCAM	chr3:105366908-105576900	TKS4_WT	TKS4_KO	155949	107020	0.68625	-0,543193444666427	-0.163518	-31.375	0.29575	0.529075	0.9999	+	ENSG00000170017.12
ALDH16A1	chr19:49453224-49471050	TKS4_WT	TKS4_KO	18215.1	27623.9	1.51654	0,600779403574101	0.180853	51.6536	0.2434	0.613679	0.9999	+	ENSG00000161618.10
ALDH18A1	chr10:95605937-95656901	TKS4_WT	TKS4_KO	140915	138427	0.982344	-0,0256998060477534	-0.00773641	-1.7656	0.96485	0.0155402	0.9999	-	ENSG00000059573.9
ALDH1A2	chr15:57953423-58072705	TKS4_WT	TKS4_KO	91.8557	45.4787	0.495659	-1,01257922833151	-0.304817	-50.4341	0.296	0.528708	0.9999	-	ENSG00000128918.15
ALDH1A3	chr15:100879830-101151839	TKS4_WT	TKS4_KO	354647	547698	1.54435	0,626996725055566	0.188745	54.4347	0.3373	0.471984	0.9999	+	ENSG00000184254.17
ALDH1B1	chr9:38392701-38398665	TKS4_WT	TKS4_KO	78926.9	84533.4	1.07103	0,0990042703632987	0.0298033	7.1034	0.8546	0.0682371	0.9999	+	ENSG00000137124.8
ALDH1L1	chr3:126006356-126210169	TKS4_WT	TKS4_KO	64.376	70.0079	1.08735	0,12081477737071	0.0363689	8.73488	1	0	1	-	ENSG00000144908.14
ALDH1L2	chr12:105019783-105084609	TKS4_WT	TKS4_KO	1640.05	1649.35	1.00567	0,008157283332619	0.00245559	0.567021	0.9927	0.00318198	0.9999	-	ENSG00000136010.14
ALDH2	chr12:111766932-111817532	TKS4_WT	TKS4_KO	17926.8	20642	1.15146	0,203463716653821	0.0612487	15.146	0.7226	0.141102	0.9999	+	ENSG00000111275.13
ALDH3A1	chr17:19737983-19748390	TKS4_WT	TKS4_KO	146.815	412.117	2.80582	1,48842230107888	0.44806	180.582	0.2727	0.564315	0.9999	-	ENSG00000108602.18
ALDH3A2	chr17:19648135-19677596	TKS4_WT	TKS4_KO	87958.7	104686	1.19017	0,251170069863513	0.0756097	19.0172	0.64125	0.192973	0.9999	+	ENSG00000072210.19
ALDH3B1	chr11:68008546-68029276	TKS4_WT	TKS4_KO	10082.1	22303.7	2.2122	1,14547905121323	0.344824	121.22	0.07375	1.13224	0.9999	+	ENSG00000006534.17
ALDH4A1	chr1:18871429-18902580	TKS4_WT	TKS4_KO	14879.2	17117.2	1.15041	0,202148499824842	0.0608528	15.041	0.73135	0.135875	0.9999	-	ENSG00000159423.17
ALDH5A1	chr6:24402935-24537207	TKS4_WT	TKS4_KO	11201.9	18461.1	1.64803	0,720739999530616	0.216964	64.8027	0.683	0.165579	0.9999	+	ENSG00000112294.14
ALDH6A1	chr14:74019348-74084453	TKS4_WT	TKS4_KO	20116.7	18865.1	0.937783	-0,0926734374098677	-0.0278975	-6.22167	0.8812	0.0549255	0.9999	-	ENSG00000119711.13
ALDH7A1	chr5:126541840-126595219	TKS4_WT	TKS4_KO	38811.3	41263.5	1.06318	0,0883892183700165	0.0266078	6.31825	0.8663	0.0623317	0.9999	-	ENSG00000164904.18
ALDH8A1	chr6:134917392-134950101	TKS4_WT	TKS4_KO	2187.24	2259.45	1.03301	0,046857991502261	0.0141057	3.30127	0.9519	0.0214087	0.9999	-	ENSG00000118514.14
ALDH9A1	chr1:165662211-165698663	TKS4_WT	TKS4_KO	50034.1	59172.3	1.18264	0,242009850229642	0.0728522	18.2639	0.6399	0.193888	0.9999	-	ENSG00000143149.13
ALDOC	chr17:28573114-28576963	TKS4_WT	TKS4_KO	18260.5	30454.6	1.66778	0,737930723303153	0.222139	66.7782	0.26075	0.583776	0.9999	-	ENSG00000109107.14
ALG1	chr16:5071824-5097795	TKS4_WT	TKS4_KO	37608.6	28451.8	0.756524	-0,40254144034832	-0.121177	-24.3476	0.6688	0.174704	0.9999	+	ENSG00000033011.14
ALG10	chr12:34022314-34035296	TKS4_WT	TKS4_KO	23994.5	18727.4	0.780488	-0,357551440938616	-0.107634	-21.9512	0.5304	0.275396	0.9999	+	ENSG00000139133.7
ALG10B	chr12:38316678-38329725	TKS4_WT	TKS4_KO	13306.1	14284.8	1.07355	0,102392313319346	0.0308232	7.35522	0.85455	0.0682625	0.9999	+	ENSG00000175548.9
ALG11	chr13:52012397-52033600	TKS4_WT	TKS4_KO	41617.1	39253.3	0.943201	-0,0843622830957672	-0.0253956	-5.67986	0.871	0.0599818	0.9999
ALG12	chr22:49853843-49918469	TKS4_WT	TKS4_KO	16148.8	18948.9	1.17339	0,230685817209037	0.0694434	17.3393	0.8789	0.0560605	0.9999	-	ENSG00000182858.14
ALG13	chrX:111680740-111764164	TKS4_WT	TKS4_KO	37887.6	33675.1	0.888816	-0,170043048660867	-0.0511881	-11.1184	0.7477	0.126273	0.9999	+	ENSG00000101901.12
ALG14	chr1:94974404-95072974	TKS4_WT	TKS4_KO	14432.8	10424.6	0.722287	-0,469355342742285	-0.14129	-27.7713	0.4499	0.346884	0.9999	-	ENSG00000172339.10
ALG2	chr9:99216424-99221942	TKS4_WT	TKS4_KO	29264.2	29039.6	0.992325	-0,0111152205345067	-0.00334601	-0.767488	0.98525	0.00645356	0.9999	-	ENSG00000119523.10
ALG3	chr3:184229592-184293031	TKS4_WT	TKS4_KO	25940.7	23330.9	0.899394	-0,152974827578602	-0.04605	-10.0606	0.8616	0.0646943	0.9999	-	ENSG00000214160.10
ALG5	chr13:36949737-36999367	TKS4_WT	TKS4_KO	25160.9	16418.8	0.652554	-0,615831786286877	-0.185384	-34.7446	0.3209	0.49363	0.9999	-	ENSG00000120697.10
ALG6	chr1:63367626-63438553	TKS4_WT	TKS4_KO	19716.7	13482.8	0.683828	-0,548294588773034	-0.165053	-31.6172	0.40425	0.39335	0.9999	+	ENSG00000088035.18
ALG8	chr11:78100941-78139643	TKS4_WT	TKS4_KO	34963.5	27962.7	0.799769	-0,322344909086302	-0.0970355	-20.0231	0.5789	0.237396	0.9999	-	ENSG00000159063.14
ALG9	chr11:111776095-111871581	TKS4_WT	TKS4_KO	25914.3	24173.2	0.932813	-0,100339556189933	-0.0302052	-6.71866	0.86505	0.0629588	0.9999	-	ENSG00000086848.15
ALK	chr2:29190991-29921589	TKS4_WT	TKS4_KO	119.335	146.167	1.22466	0,292378637647058	0.0880147	22.4658	0.8005	0.0966387	0.9999	-	ENSG00000171094.18
ALKBH1	chr14:77672403-77708038	TKS4_WT	TKS4_KO	28935.6	20732.9	0.71652	-0,480921660593569	-0.144772	-28.348	0.44725	0.34945	0.9999	-	ENSG00000100601.10
ALKBH2	chr12:109088187-109093631	TKS4_WT	TKS4_KO	22448.8	16513.4	0.735604	-0,442998825690265	-0.133356	-26.4396	0.4661	0.331521	0.9999	-	ENSG00000189046.11
ALKBH3	chr11:43880830-43920944	TKS4_WT	TKS4_KO	26384	19449.6	0.737175	-0,439920869271395	-0.132429	-26.2825	0.478	0.320572	0.9999	+	ENSG00000166199.13
ALKBH4	chr7:102433574-102464863	TKS4_WT	TKS4_KO	14932.8	15601.9	1.04481	0,0632366110990333	0.0190361	4.48071	0.95025	0.0221621	0.9999	-	ENSG00000160993.4
ALKBH5	chr17:18183827-18209954	TKS4_WT	TKS4_KO	154890	157952	1.01977	0,028242182723149	0.00850174	1.97689	0.95875	0.0182946	0.9999	+	ENSG00000091542.9
ALKBH6	chr19:36009119-36014255	TKS4_WT	TKS4_KO	7518.13	8269.69	1.09997	0,137457643169837	0.0413789	9.9965	0.82525	0.0834145	0.9999	-	ENSG00000239382.11
ALKBH7	chr19:6372793-6375916	TKS4_WT	TKS4_KO	18811.3	26940.6	1.43215	0,518180114334661	0.155988	43.2148	0.3842	0.415443	0.9999	+	ENSG00000125652.8
ALKBH8	chr11:107502725-107565737	TKS4_WT	TKS4_KO	21289.8	15646.9	0.734949	-0,444283097689005	-0.133743	-26.5051	0.44475	0.351884	0.9999	-	ENSG00000137760.15
ALMS1	chr2:73385757-73609919	TKS4_WT	TKS4_KO	117961	99301.2	0.841814	-0,248426670873204	-0.0747839	-15.8186	0.661	0.179799	0.9999	+	ENSG00000116127.20
ALOX12	chr17:6985122-7012334	TKS4_WT	TKS4_KO	220.608	482.125	2.1849	1,12756752263254	0.339432	118.49	0.5444	0.264082	0.9999	+	ENSG00000108839.12
ALOX12B	chr17:8072635-8087716	TKS4_WT	TKS4_KO	354.068	516.918	1.45981	0,545780642164734	0.164296	45.981	0.763	0.117475	0.9999	-	ENSG00000179477.11
ALOX15	chr17:4630918-4641678	TKS4_WT	TKS4_KO	124.044	494.96	3.98779	1,99558885037272	0.600732	298.779	0.17965	0.745573	0.9999	-	ENSG00000161905.13
ALOX15B	chr17:8039058-8049134	TKS4_WT	TKS4_KO	32.188	67.6214	2.09742	1,0686137187236	0.321685	109.742	1	0	1	+	ENSG00000179593.16
ALOX5	chr10:45374208-45453121	TKS4_WT	TKS4_KO	620.218	382.393	0.616608	-0,697574643438502	-0.209991	-38.3392	0.504	0.297569	0.9999	+	ENSG00000012779.12
ALOXE3	chr17:8095899-8118916	TKS4_WT	TKS4_KO	2342.7	2246.14	0.958784	-0,0607217185215776	-0.0182791	-4.12156	0.9371	0.0282141	0.9999	-	ENSG00000179148.10
ALPG	chr2:232406843-232414516	TKS4_WT	TKS4_KO	321.88	136.436	0.424051	-1,23768968519017	-0.372582	-57.5949	1	0	1	+	ENSG00000163286.9
ALPK1	chr4:112297368-112442621	TKS4_WT	TKS4_KO	15906.1	11694.1	0.735198	-0,443796045861291	-0.133596	-26.4802	0.50275	0.298648	0.9999	+	ENSG00000073331.18
ALPK2	chr18:58481246-58629091	TKS4_WT	TKS4_KO	440.445	552.208	1.25369	0,326183632027783	0.0981911	25.3693	0.74635	0.127057	0.9999	-	ENSG00000198796.7
ALPK3	chr15:84817355-84873479	TKS4_WT	TKS4_KO	2068.68	5622.33	2.71775	1,44241356134454	0.43421	171.775	0.12645	0.898081	0.9999	+	ENSG00000136383.7
ALPL	chr1:21508983-21578412	TKS4_WT	TKS4_KO	330.526	133.094	0.402854	-1,31167108607657	-0.394852	-59.7146	0.08665	1.06223	0.9999	+	ENSG00000162551.14
ALPP	chr2:232378750-232382889	TKS4_WT	TKS4_KO	891.077	185.917	0.208732	-2,2602775247369	-0.680411	-79.1268	0.11895	0.924636	0.9999	+	ENSG00000163283.7
ALS2	chr2:201644873-201781153	TKS4_WT	TKS4_KO	59068.9	38548.2	0.652598	-0,615733950328087	-0.185354	-34.7402	0.2937	0.532096	0.9999
ALS2CL	chr3:46668994-46693693	TKS4_WT	TKS4_KO	13969.1	19551.8	1.39964	0,485059409861777	0.146017	39.9644	0.41515	0.381795	0.9999	-	ENSG00000178038.17
ALX3	chr1:110059869-110070672	TKS4_WT	TKS4_KO	151.523	226.2	1.49252	0,577747969162477	0.173919	49.2518	0.705	0.151811	0.9999	-	ENSG00000156150.9
ALX4	chr11:44260439-44310139	TKS4_WT	TKS4_KO	193.128	244.763	1.26722	0,341670626813737	0.102853	26.7223	1	0	1	-	ENSG00000052850.8
ALYREF	chr17:81887834-81900533	TKS4_WT	TKS4_KO	106054	71570.8	0.674853	-0,567355369146715	-0.170791	-32.5147	0.41975	0.377009	0.9999	-	ENSG00000183684.8
AMBRA1	chr11:46396411-46594055	TKS4_WT	TKS4_KO	38175.4	41980.9	1.09968	0,137089479759868	0.041268	9.96844	0.8126	0.0901232	0.9999	-	ENSG00000110497.15
AMD1	chr6:110609977-110895713	TKS4_WT	TKS4_KO	206817	176783	0.85478	-0,226375111671967	-0.0681457	-14.522	0.73855	0.13162	0.9999	+	ENSG00000123505.19
AMDHD1	chr12:95943330-95968720	TKS4_WT	TKS4_KO	2518.63	2590.16	1.0284	0,0404004392201128	0.0121617	2.83992	0.95975	0.0178419	0.9999	+	ENSG00000139344.8
AMDHD2	chr16:2520361-2531422	TKS4_WT	TKS4_KO	19822.9	21840.6	1.10179	0,139843780160435	0.0420972	10.1786	0.81835	0.0870609	0.9999	+	ENSG00000162066.16
AMER1	chrX:64185116-64205708	TKS4_WT	TKS4_KO	9447.78	12325.7	1.30461	0,383618741139419	0.115481	30.461	0.5237	0.280917	0.9999	-	ENSG00000184675.11
AMFR	chr16:56361451-56425545	TKS4_WT	TKS4_KO	99190.4	114336	1.15269	0,205007128161536	0.0617133	15.2692	0.69785	0.156238	0.9999	-	ENSG00000159461.15
AMIGO1	chr1:109504177-109509742	TKS4_WT	TKS4_KO	146.815	23.336	0.159521	-2,64818344219572	-0.797183	-84.0479	0.1173	0.930702	0.9999	-	ENSG00000181754.7
AMIGO2	chr12:47075706-47236663	TKS4_WT	TKS4_KO	2209.24	1083.69	0.490549	-1,02753021444176	-0.309317	-50.9451	0.3131	0.504317	0.9999	-	ENSG00000139211.7
AMIGO3	chr3:49673101-49723951	TKS4_WT	TKS4_KO	2732.9	3642.15	1.33269	0,414344490839632	0.12473	33.2693	0.81705	0.0877514	0.9999	-	ENSG00000176020.9
AMMECR1	chrX:110194185-110456334	TKS4_WT	TKS4_KO	42674.9	33405.1	0.782781	-0,353318456832605	-0.106359	-21.7219	0.5485	0.260823	0.9999	-	ENSG00000101935.12
AMMECR1L	chr2:127858309-127887575	TKS4_WT	TKS4_KO	35497.6	37523.1	1.05706	0,0800573157533172	0.0240997	5.706	0.8828	0.0541377	0.9999	-	ENSG00000144233.11
AMN	chr14:102922429-103057549	TKS4_WT	TKS4_KO	1346.42	2744.2	2.03807	1,0272025434423	0.309219	103.807	0.4913	0.308653	0.9999	+	ENSG00000166126.11
AMN1	chr12:31647159-31729174	TKS4_WT	TKS4_KO	19423.4	21825.3	1.12366	0,168204905449692	0.0506347	12.3659	0.76295	0.117504	0.9999	-	ENSG00000151743.11
AMOT	chrX:112774876-112840945	TKS4_WT	TKS4_KO	12601.5	12050.1	0.956244	-0,0645498300623109	-0.0194314	-4.37563	0.91155	0.0402195	0.9999	-	ENSG00000126016.17
AMOTL1	chr11:94543920-94876748	TKS4_WT	TKS4_KO	81139.7	67940.8	0.837331	-0,256129417029428	-0.0771026	-16.2669	0.71	0.148742	0.9999	+	ENSG00000166025.18
AMOTL2	chr3:134355344-134375417	TKS4_WT	TKS4_KO	85683.8	76387.7	0.891507	-0,165681905624468	-0.0498752	-10.8493	0.7806	0.107571	0.9999	-	ENSG00000114019.15
AMPD2	chr1:109619836-109632055	TKS4_WT	TKS4_KO	43644.8	48703.4	1.1159	0,15821237133101	0.0476267	11.5904	0.7742	0.111147	0.9999	+	ENSG00000116337.20
AMPD3	chr11:10450387-10507579	TKS4_WT	TKS4_KO	27017	22825.4	0.844854	-0,243226361657289	-0.0732184	-15.5146	0.66385	0.17793	0.9999	+	ENSG00000133805.16
AMY2B	chr1:103525698-103579534	TKS4_WT	TKS4_KO	8863.86	7004.37	0.790219	-0,33967547914609	-0.102253	-20.9781	0.56465	0.248221	0.9999
AMZ1	chr7:2679521-2844308	TKS4_WT	TKS4_KO	1800.99	2486.71	1.38073	0,465426011245633	0.140107	38.0725	0.67895	0.168162	0.9999	+	ENSG00000174945.14
AMZ2	chr17:68206128-68257164	TKS4_WT	TKS4_KO	87407.3	91050.6	1.04168	0,0589146837832983	0.0177351	4.16818	0.92325	0.0346807	0.9999	+	ENSG00000196704.14
ANAPC1	chr2:111766149-111884196	TKS4_WT	TKS4_KO	141788	117863	0.831262	-0,26662433792938	-0.0802619	-16.8738	0.70235	0.153446	0.9999	-	ENSG00000153107.13
ANAPC10	chr4:144967116-145129524	TKS4_WT	TKS4_KO	32300.9	22015.6	0.68158	-0,553046113507106	-0.166483	-31.842	0.44555	0.351104	0.9999	-	ENSG00000164162.14
ANAPC11	chr17:81887834-81900533	TKS4_WT	TKS4_KO	38234.1	41400.8	1.08282	0,114798442405418	0.0345578	8.28238	0.9145	0.0388163	0.9999	+	ENSG00000141552.18
ANAPC13	chr3:134477703-135260467	TKS4_WT	TKS4_KO	42052.5	28856.5	0.686203	-0,543293675477273	-0.163548	-31.3797	0.47055	0.327394	0.9999	-	ENSG00000129055.13
ANAPC15	chr11:71997943-72112780	TKS4_WT	TKS4_KO	10407.4	10217.2	0.981725	-0,0266095550835607	-0.00801027	-1.82753	0.97745	0.00990545	0.9999	-	ENSG00000110200.9
ANAPC16	chr10:72096031-72235860	TKS4_WT	TKS4_KO	48130.7	58807.6	1.22183	0,28904466396818	0.0870111	22.1831	0.7254	0.139422	0.9999	+	ENSG00000166295.9
ANAPC2	chr9:137174783-137188585	TKS4_WT	TKS4_KO	28692.8	35759.5	1.24629	0,317636809806722	0.0956182	24.6287	0.5516	0.258376	0.9999	-	ENSG00000176248.9
ANAPC4	chr4:25377262-25418498	TKS4_WT	TKS4_KO	40284.3	33702.2	0.836609	-0,257374217125763	-0.0774774	-16.3391	0.66645	0.176232	0.9999	+	ENSG00000053900.11
ANAPC5	chr12:121308244-121354209	TKS4_WT	TKS4_KO	178489	158241	0.886559	-0,173711614199712	-0.0522924	-11.3441	0.78175	0.106932	0.9999	-	ENSG00000089053.13
ANAPC7	chr12:110372899-110403730	TKS4_WT	TKS4_KO	82128.2	75878.1	0.923898	-0,114193980363984	-0.0343758	-7.61017	0.83915	0.0761604	0.9999	-	ENSG00000196510.14
ANGEL2	chr1:212992181-213015872	TKS4_WT	TKS4_KO	32614.4	24521.2	0.751853	-0,411478045576896	-0.123867	-24.8147	0.46105	0.336252	0.9999	-	ENSG00000174606.14
ANGPT2	chr8:6406614-6708209	TKS4_WT	TKS4_KO	5699.93	741.098	0.130034	-2,94303861877966	-0.885943	-86.9966	0.1084	0.964971	0.9999	-	ENSG00000091879.14
ANGPT4	chr20:869899-938216	TKS4_WT	TKS4_KO	59.6677	88.5709	1.48359	0,569094693227462	0.171315	48.3592	0.6677	0.175419	0.9999	-	ENSG00000101280.8
ANGPTL1	chr1:178724250-178921842	TKS4_WT	TKS4_KO	32.188	74.9657	2.32488	1,21715576368571	0.3664	132.488	1	0	1	-	ENSG00000116194.13
ANGPTL2	chr9:126914779-127223166	TKS4_WT	TKS4_KO	32.188	67.6214	2.09742	1,0686137187236	0.321685	109.742	1	0	1	-	ENSG00000136859.10
ANGPTL4	chr19:8364128-8374373	TKS4_WT	TKS4_KO	3981.98	4611.62	1.15812	0,21178271750308	0.063753	15.8118	0.76215	0.11796	0.9999	+	ENSG00000167772.12
ANGPTL6	chr19:10086118-10119899	TKS4_WT	TKS4_KO	399.611	224.052	0.560785	-0,834479904186715	-0.251203	-43.9215	0.62755	0.202352	0.9999	-	ENSG00000130812.11
ANGPTL7	chr1:11106534-11299574	TKS4_WT	TKS4_KO	32.188	44.2855	1.37467	0,459090369660878	0.1382	37.4675	1	0	1	+	ENSG00000171819.5
ANK1	chr8:41653224-41896741	TKS4_WT	TKS4_KO	2340.31	4014.38	1.71529	0,778451838406289	0.234337	71.5289	0.4207	0.376027	0.9999	-	ENSG00000029534.21
ANK2	chr4:112705621-113383740	TKS4_WT	TKS4_KO	8266.33	7660.39	0.926699	-0,109827734744955	-0.0330614	-7.33013	0.8776	0.0567034	0.9999	+	ENSG00000145362.21
ANK3	chr10:60026297-60733528	TKS4_WT	TKS4_KO	11032.1	16169.2	1.46565	0,551536706669052	0.166029	46.5646	0.42195	0.374739	0.9999	-	ENSG00000151150.22
ANKDD1A	chr15:64911901-64962604	TKS4_WT	TKS4_KO	4772.56	4448.6	0.932122	-0,101409750722774	-0.0305274	-6.78783	0.9166	0.0378201	0.9999	+	ENSG00000166839.17
ANKDD1B	chr5:75611288-75671846	TKS4_WT	TKS4_KO	559.78	307.317	0.549077	-0,864920697585987	-0.260367	-45.0923	0.31425	0.502725	0.9999	+	ENSG00000189045.15
ANKEF1	chr20:10023811-10307420	TKS4_WT	TKS4_KO	30184.4	26138.8	0.865971	-0,207609473744471	-0.0624967	-13.4029	0.69675	0.156923	0.9999	+	ENSG00000132623.16
ANKFN1	chr17:56110934-56517016	TKS4_WT	TKS4_KO	804.7	35.2153	0.0438808	-4,5102650479244	-1.35773	-95.6119	1	0	1	+	ENSG00000153930.13
ANKFY1	chr17:4163817-4263979	TKS4_WT	TKS4_KO	79699	80196.4	1.00624	0,00897584208779974	0.002702	0.624097	0.9863	0.00599097	0.9999	-	ENSG00000185722.18
ANKIB1	chr7:92198968-92401383	TKS4_WT	TKS4_KO	69933	50596.6	0.723501	-0,466932165461213	-0.140561	-27.6499	0.4865	0.312917	0.9999	+	ENSG00000001629.10
ANKK1	chr11:113386013-113400416	TKS4_WT	TKS4_KO	854.951	1479.26	1.73014	0,790890794760755	0.238082	73.0142	0.4062	0.39126	0.9999	+	ENSG00000170209.5
ANKLE1	chr19:17281900-17287646	TKS4_WT	TKS4_KO	15051.1	17396.3	1.15581	0,20891027200051	0.0628883	15.5815	0.7231	0.140802	0.9999	+	ENSG00000160117.16
ANKLE2	chr12:132725502-132761832	TKS4_WT	TKS4_KO	80995.2	75724.2	0.934922	-0,0970818569117697	-0.0292246	-6.50779	0.8681	0.0614302	0.9999	-	ENSG00000176915.15
ANKMY1	chr2:240468631-240565256	TKS4_WT	TKS4_KO	11463.9	12312.5	1.07402	0,103024927128864	0.0310136	7.4023	0.8986	0.0464336	0.9999	-	ENSG00000144504.16
ANKMY2	chr7:16599778-16645816	TKS4_WT	TKS4_KO	47244.5	37325.9	0.790059	-0,33996852839112	-0.102341	-20.9941	0.5662	0.24703	0.9999	-	ENSG00000106524.9
ANKRA2	chr5:73552189-73565639	TKS4_WT	TKS4_KO	9273.66	10400.3	1.12149	0,165412719445937	0.0497942	12.1487	0.7871	0.10397	0.9999	-	ENSG00000164331.10
ANKRD1	chr10:90912095-90921087	TKS4_WT	TKS4_KO	1947.12	398.402	0.204652	-2,28875702129996	-0.688985	-79.5348	0.0753	1.12321	0.9999	-	ENSG00000148677.7
ANKRD10	chr13:110878539-110915071	TKS4_WT	TKS4_KO	372010	467229	1.25596	0,328788340316001	0.0989752	25.5958	0.576	0.239578	0.9999	-	ENSG00000088448.14
ANKRD11	chr16:89267618-89490561	TKS4_WT	TKS4_KO	179790	181503	1.00953	0,0136806069075876	0.00411827	0.952778	0.98255	0.00764534	0.9999	-	ENSG00000167522.17
ANKRD12	chr18:9136766-9285985	TKS4_WT	TKS4_KO	47896.4	38701.1	0.808017	-0,307541935573523	-0.0925793	-19.1983	0.5675	0.246034	0.9999	+	ENSG00000101745.17
ANKRD13A	chr12:109999168-110039763	TKS4_WT	TKS4_KO	35463.4	38010.7	1.07183	0,100074462219643	0.0301254	7.18288	0.87855	0.0562335	0.9999	+	ENSG00000076513.17
ANKRD13B	chr17:29589768-29622912	TKS4_WT	TKS4_KO	14122.1	12471.1	0.883092	-0,179364563204397	-0.0539941	-11.6908	0.81635	0.0881236	0.9999	+	ENSG00000198720.13
ANKRD13C	chr1:70258998-70368023	TKS4_WT	TKS4_KO	56995.3	45575.6	0.799638	-0,322580671681215	-0.0971065	-20.0362	0.595	0.225483	0.9999	-	ENSG00000118454.13
ANKRD13D	chr11:67289302-67302484	TKS4_WT	TKS4_KO	19702.8	19551	0.992296	-0,0111582105726976	-0.00335896	-0.770445	0.9838	0.00709318	0.9999	+	ENSG00000172932.16
ANKRD17	chr4:73069872-73369942	TKS4_WT	TKS4_KO	201600	182962	0.90755	-0,139951524556654	-0.0421296	-9.24504	0.8136	0.0895891	0.9999	-	ENSG00000132466.20
ANKRD2	chr10:97572440-97583884	TKS4_WT	TKS4_KO	563.719	1536.4	2.72517	1,44634376605976	0.435393	172.517	0.36925	0.432679	0.9999	+	ENSG00000165887.12
ANKRD20A1	chr9:67858930-67902394	TKS4_WT	TKS4_KO	729.367	901.772	1.23634	0,306079976364585	0.0921393	23.6344	0.72735	0.138257	0.9999	+	ENSG00000260691.7
ANKRD20A2P	chr9:40223284-40282358	TKS4_WT	TKS4_KO	436.507	582.76	1.33498	0,416814136196615	0.125474	33.4976	0.59225	0.227495	0.9999	+	ENSG00000183148.7
ANKRD20A3P	chr9:66093945-66154762	TKS4_WT	TKS4_KO	179.003	364.252	2.03432	1,02454340708677	0.308418	103.432	0.2604	0.584359	0.9999	-	ENSG00000276203.5
ANKRD22	chr10:88802729-88851844	TKS4_WT	TKS4_KO	1465.75	3644.77	2.48652	1,31412987902564	0.395593	148.652	0.17095	0.767131	0.9999	-	ENSG00000152766.6
ANKRD23	chr2:96837911-96844021	TKS4_WT	TKS4_KO	2569.56	2971.72	1.1565	0,209769251593235	0.0631468	15.6503	0.79925	0.0973174	0.9999	-	ENSG00000163126.15
ANKRD24	chr19:4182617-4224814	TKS4_WT	TKS4_KO	1608.63	2784.85	1.73115	0,791729213433294	0.238334	73.1148	0.21215	0.673357	0.9999	+	ENSG00000089847.13
ANKRD26	chr10:26931205-27100498	TKS4_WT	TKS4_KO	45717.4	40198.8	0.879289	-0,185590489737278	-0.0558683	-12.0711	0.76155	0.118302	0.9999
ANKRD27	chr19:32597004-32675215	TKS4_WT	TKS4_KO	85665.7	74807.8	0.873253	-0,19552872588778	-0.05886	-12.6747	0.72295	0.140892	0.9999	-	ENSG00000105186.16
ANKRD28	chr3:15560698-15859814	TKS4_WT	TKS4_KO	98541.8	88596	0.89907	-0,153494095973251	-0.0462063	-10.093	0.83865	0.0764192	0.9999	-	ENSG00000206560.12
ANKRD29	chr18:23598925-23662914	TKS4_WT	TKS4_KO	6534.34	6478.75	0.991493	-0,0123258461402177	-0.00371045	-0.850723	0.98485	0.00662991	0.9999	-	ENSG00000154065.17
ANKRD31	chr5:75068296-75236922	TKS4_WT	TKS4_KO	1289.15	566.346	0.439361	-1,18652171173176	-0.357179	-56.0639	0.0239	1.6216	0.9999	-	ENSG00000145700.10
ANKRD33B	chr5:10564069-10657816	TKS4_WT	TKS4_KO	46774.6	43681.1	0.933864	-0,0987159102559259	-0.0297165	-6.61362	0.858	0.0665127	0.9999	+	ENSG00000164236.12
ANKRD34A	chr1:145959036-145978848	TKS4_WT	TKS4_KO	1143.1	1650.27	1.44364	0,529711680090839	0.159459	44.3641	0.78535	0.104937	0.9999	-	ENSG00000272031.3
ANKRD36	chr2:97113152-97264521	TKS4_WT	TKS4_KO	35811.1	33971.5	0.948631	-0,0760816947318091	-0.0229029	-5.13694	0.8826	0.0542361	0.9999	+	ENSG00000135976.21
ANKRD36B	chr2:97492662-97590337	TKS4_WT	TKS4_KO	18291.5	17392.7	0.950863	-0,0726910705341278	-0.0218822	-4.91373	0.90385	0.0439036	0.9999	-	ENSG00000196912.13
ANKRD36C	chr2:95848931-95991824	TKS4_WT	TKS4_KO	29569.5	40882.2	1.38258	0,467361635565851	0.14069	38.2579	0.36215	0.441112	0.9999	-	ENSG00000174501.15
ANKRD37	chr4:185151722-185472263	TKS4_WT	TKS4_KO	1366.88	2508.56	1.83518	0,875924819456236	0.26368	83.5184	0.53305	0.273232	0.9999	+	ENSG00000186352.9
ANKRD39	chr2:96847989-96858016	TKS4_WT	TKS4_KO	8607.13	8372.49	0.972739	-0,0398750415709624	-0.0120036	-2.72608	0.9418	0.0260413	0.9999	-	ENSG00000213337.9
ANKRD40	chr17:50693194-50707914	TKS4_WT	TKS4_KO	143432	134676	0.938954	-0,0908740854891008	-0.0273558	-6.10463	0.8569	0.0670699	0.9999	-	ENSG00000154945.7
ANKRD42	chr11:83193711-83256099	TKS4_WT	TKS4_KO	11674.5	8132.41	0.696599	-0,521600524199199	-0.157017	-30.3401	0.37235	0.429049	0.9999
ANKRD44	chr2:196962616-197310787	TKS4_WT	TKS4_KO	7261.39	7521.84	1.03587	0,0508391903824256	0.0153041	3.58673	0.93305	0.0300951	0.9999	-	ENSG00000065413.20
ANKRD45	chr1:173500459-173705430	TKS4_WT	TKS4_KO	293.63	787.478	2.6813	1,42293218964418	0.428345	168.13	0.05245	1.28025	0.9999	-	ENSG00000183831.7
ANKRD46	chr8:100509751-100559759	TKS4_WT	TKS4_KO	19480.2	19861.1	1.01955	0,0279368967933092	0.00840984	1.95531	0.9658	0.0151128	0.9999	-	ENSG00000186106.11
ANKRD49	chr11:94415569-94532123	TKS4_WT	TKS4_KO	10975.9	8674.29	0.790305	-0,339518173378031	-0.102205	-20.9695	0.7377	0.13212	0.9999	+	ENSG00000168876.9
ANKRD50	chr4:124664047-124712732	TKS4_WT	TKS4_KO	68433.3	70940.8	1.03664	0,0519170062454306	0.0156286	3.66415	0.9184	0.0369681	0.9999	-	ENSG00000151458.12
ANKRD52	chr12:56230035-56258391	TKS4_WT	TKS4_KO	105422	99122.6	0.940246	-0,0888899451892302	-0.0267585	-5.97541	0.88055	0.055246	0.9999	-	ENSG00000139645.11
ANKRD53	chr2:70973244-70994873	TKS4_WT	TKS4_KO	490.696	513.228	1.04591	0,0647574649220202	0.0194939	4.59091	0.96865	0.0138331	0.9999	+	ENSG00000144031.12
ANKRD6	chr6:89433151-89828021	TKS4_WT	TKS4_KO	15007.2	13034.9	0.868577	-0,20327385864251	-0.0611915	-13.1423	0.77875	0.108602	0.9999	+	ENSG00000135299.17
ANKRD61	chr7:6009271-6059175	TKS4_WT	TKS4_KO	183.711	98.3016	0.535341	-0,901469427023998	-0.271369	-46.4659	0.6532	0.184954	0.9999	+	ENSG00000157999.6
ANKRD62	chr18:12093795-12181684	TKS4_WT	TKS4_KO	868.306	975.892	1.12389	0,168499628499048	0.0507234	12.3889	0.86845	0.0612552	0.9999	+	ENSG00000181626.12
ANKRD63	chr15:40278371-40283064	TKS4_WT	TKS4_KO	872.244	1569.92	1.79977	0,847813872821386	0.255217	79.9772	0.2664	0.574466	0.9999	-	ENSG00000230778.2
ANKRD9	chr14:102362940-102509776	TKS4_WT	TKS4_KO	18439.4	27735.3	1.50413	0,588928995556566	0.177285	50.413	0.4923	0.30777	0.9999	-	ENSG00000156381.9
ANKS1A	chr6:34889254-35097992	TKS4_WT	TKS4_KO	45383.6	55312.9	1.21879	0,285444358833264	0.0859273	21.8786	0.6172	0.209574	0.9999	+	ENSG00000064999.15
ANKS1B	chr12:98645140-99984936	TKS4_WT	TKS4_KO	803.93	550.94	0.685348	-0,545092284457018	-0.164089	-31.4652	0.48415	0.31502	0.9999	-	ENSG00000185046.20
ANKS3	chr16:4696509-4767219	TKS4_WT	TKS4_KO	7621.71	8864.51	1.16306	0,217923516480442	0.0656015	16.3058	0.81215	0.0903638	0.9999	-	ENSG00000168096.15
ANKS4B	chr16:21227150-21253850	TKS4_WT	TKS4_KO	32.188	68.8147	2.13437	1,09381367340273	0.329271	113.437	1	0	1	+	ENSG00000175311.7
ANKS6	chr9:98732008-98796555	TKS4_WT	TKS4_KO	54707.6	59769.9	1.09253	0,127677638995946	0.0384348	9.25336	0.8217	0.0852867	0.9999	-	ENSG00000165138.18
ANKZF1	chr2:219229805-219245444	TKS4_WT	TKS4_KO	28783.2	32428.9	1.12666	0,172052530394967	0.051793	12.666	0.7583	0.120159	0.9999	+	ENSG00000163516.14
ANLN	chr7:36324151-36453791	TKS4_WT	TKS4_KO	299447	225569	0.753285	-0,408731709556198	-0.123041	-24.6715	0.60485	0.218352	0.9999	+	ENSG00000011426.11
ANO1	chr11:69985906-70189530	TKS4_WT	TKS4_KO	57186.8	89670.5	1.56803	0,648950349335392	0.195354	56.8027	0.24305	0.614304	0.9999	+	ENSG00000131620.18
ANO10	chr3:43365847-43734371	TKS4_WT	TKS4_KO	15807.2	16088.4	1.01779	0,0254388575738841	0.00765786	1.77892	0.98315	0.00738022	0.9999	-	ENSG00000160746.13
ANO2	chr12:5560240-5948790	TKS4_WT	TKS4_KO	563.719	167.539	0.297328	-1,7498742751147	-0.526765	-70.2672	0.122	0.91364	0.9999	-	ENSG00000047617.17
ANO4	chr12:100717456-101128641	TKS4_WT	TKS4_KO	1928.97	3067.64	1.59027	0,669270720078502	0.201471	59.0269	0.28445	0.545994	0.9999	+	ENSG00000151572.18
ANO5	chr11:22192484-22283367	TKS4_WT	TKS4_KO	4373.8	93.3439	0.021364	-5,54867593817126	-1.67032	-97.8636	0.2415	0.617083	0.9999	+	ENSG00000171714.13
ANO6	chr12:45216032-45568844	TKS4_WT	TKS4_KO	145799	131057	0.898888	-0,153786300527546	-0.0462943	-10.1112	0.8022	0.0957173	0.9999	+	ENSG00000177119.17
ANO7	chr2:241188550-241354027	TKS4_WT	TKS4_KO	611.572	539.778	0.882627	-0,180124808298937	-0.054223	-11.7373	1	0	1	+	ENSG00000146205.15
ANO8	chr19:17309562-17334855	TKS4_WT	TKS4_KO	17463.3	23937.3	1.37072	0,454931991304574	0.136948	37.0718	0.8009	0.0964217	0.9999	-	ENSG00000074855.11
ANO9	chr11:417933-442011	TKS4_WT	TKS4_KO	19469.4	39763.4	2.04235	1,03022891471053	0.31013	104.235	0.1273	0.895172	0.9999	-	ENSG00000185101.13
ANP32A	chr15:68778534-68820895	TKS4_WT	TKS4_KO	99696.9	99808	1.00111	0,00160681040847009	0.000483698	0.111438	0.9973	0.00117418	0.9999	-	ENSG00000140350.15
ANP32B	chr9:97983340-98015943	TKS4_WT	TKS4_KO	57402.3	53504.7	0.9321	-0,101442733616479	-0.0305373	-6.78996	0.87005	0.0604558	0.9999	+	ENSG00000136938.9
ANP32E	chr1:150218416-150236133	TKS4_WT	TKS4_KO	105825	101858	0.962514	-0,0551211405097167	-0.0165931	-3.74864	0.92165	0.035434	0.9999	-	ENSG00000143401.15
ANPEP	chr15:89784894-89814852	TKS4_WT	TKS4_KO	0	201.138	2012.38	10,9746870412724	3.30371	201138	5e-05	4.30103	0.0171564	-	ENSG00000166825.15
ANTKMT	chr16:720580-726880	TKS4_WT	TKS4_KO	17800.1	19507.2	1.0959	0,132120657585694	0.0397723	9.59034	0.85045	0.0703512	0.9999	+	ENSG00000103254.10
ANTXR1	chr2:69013143-69249327	TKS4_WT	TKS4_KO	63821.5	69545.7	1.08969	0,123918613100399	0.0373032	8.96906	0.80835	0.0924006	0.9999	+	ENSG00000169604.21
ANTXR2	chr4:79901145-80073472	TKS4_WT	TKS4_KO	13937.8	9465.72	0.679142	-0,558213815668808	-0.168039	-32.0858	0.36975	0.432092	0.9999	-	ENSG00000163297.18
ANXA1	chr9:73151864-73170393	TKS4_WT	TKS4_KO	363783	423362	1.16378	0,218813600597618	0.0658695	16.3776	0.7588	0.119873	0.9999	+	ENSG00000135046.14
ANXA10	chr4:168092524-168199047	TKS4_WT	TKS4_KO	1246.77	1998.6	1.60297	0,680750887241852	0.204926	60.2974	0.6226	0.205791	0.9999	+	ENSG00000109511.12
ANXA11	chr10:80150888-80205808	TKS4_WT	TKS4_KO	88899.1	92761.1	1.04344	0,0613510470830746	0.0184685	4.34425	0.931	0.0310503	0.9999	-	ENSG00000122359.18
ANXA2	chr15:60347150-60398025	TKS4_WT	TKS4_KO	1574870	1342140	0.852223	-0,230697559835391	-0.0694469	-14.7777	0.85175	0.0696879	0.9999	-	ENSG00000182718.18
ANXA2R	chr5:43014728-43093558	TKS4_WT	TKS4_KO	473.403	721.398	1.52375	0,607621829268295	0.182912	52.3745	0.7738	0.111371	0.9999	-	ENSG00000177721.5
ANXA3	chr4:78551760-78610447	TKS4_WT	TKS4_KO	383823	199664	0.520198	-0,942866584590831	-0.283831	-47.9802	0.16655	0.778455	0.9999	+	ENSG00000138772.13
ANXA4	chr2:69643807-69827112	TKS4_WT	TKS4_KO	25595.6	34189.4	1.33575	0,4176518622266	0.125726	33.5752	0.4546	0.342371	0.9999	+	ENSG00000196975.16
ANXA5	chr4:121667945-121696994	TKS4_WT	TKS4_KO	157982	192191	1.21654	0,282780424648883	0.0851254	21.6537	0.5908	0.22856	0.9999	-	ENSG00000164111.15
ANXA6	chr5:151100705-151157779	TKS4_WT	TKS4_KO	84030.8	119472	1.42176	0,507681907732217	0.152827	42.1764	0.33	0.481486	0.9999	-	ENSG00000197043.14
ANXA7	chr10:73375100-73414058	TKS4_WT	TKS4_KO	128173	107677	0.840091	-0,251382051429819	-0.0756735	-15.9909	0.6788	0.168258	0.9999	-	ENSG00000138279.16
ANXA8	chr10:47467992-47991879	TKS4_WT	TKS4_KO	169.586	108.565	0.640389	-0,642980203414344	-0.193556	-35.9611	1	0	1	-	ENSG00000265190.7
ANXA9	chr1:150982285-150996063	TKS4_WT	TKS4_KO	1052.02	921.823	0.876253	-0,190581095861027	-0.0573706	-12.3747	0.8299	0.0809742	0.9999	+	ENSG00000143412.10
AOAH	chr7:36509312-36724549	TKS4_WT	TKS4_KO	215.899	0	0.000462965	-11,0768089178917	-3.33445	-99.9537	5e-05	4.30103	0.0171564	-	ENSG00000136250.12
AOC1	chr7:150818963-150877309	TKS4_WT	TKS4_KO	128.752	110.714	0.86001	-0,217574770568885	-0.0654965	-13.999	1	0	1	+	ENSG00000002726.21
AOC2	chr17:42844579-42850707	TKS4_WT	TKS4_KO	6087.56	7293.69	1.19813	0,260780877169826	0.0785029	19.8127	0.6911	0.160459	0.9999	+	ENSG00000131480.9
AOC3	chr17:42851181-42858131	TKS4_WT	TKS4_KO	4056.54	4716.17	1.16261	0,217361034426712	0.0654322	16.2605	0.7807	0.107516	0.9999	+	ENSG00000131471.7
AOPEP	chr9:94726668-95317730	TKS4_WT	TKS4_KO	19803.3	98009.9	4.94915	2,30718081094796	0.694531	394.915	0.00015	3.82391	0.0428909
AOX1	chr2:200585951-200677064	TKS4_WT	TKS4_KO	311.693	163.004	0.523116	-0,93479637528346	-0.281402	-47.6884	0.47385	0.324359	0.9999	+	ENSG00000138356.14
AP1AR	chr4:112231786-112273110	TKS4_WT	TKS4_KO	50975.4	52679.7	1.03343	0,0474458472036343	0.0142826	3.34337	0.9313	0.0309104	0.9999	+	ENSG00000138660.12
AP1B1	chr22:29327679-29388570	TKS4_WT	TKS4_KO	84414.6	91714.2	1.08647	0,119652442759404	0.036019	8.64731	0.82065	0.085842	0.9999	-	ENSG00000100280.17
AP1G1	chr16:71728999-71808834	TKS4_WT	TKS4_KO	168279	155729	0.925422	-0,111817451466809	-0.0336604	-7.45785	0.83875	0.0763675	0.9999	-	ENSG00000166747.13
AP1M1	chr19:16197910-16245906	TKS4_WT	TKS4_KO	40953.2	36764.9	0.89773	-0,155646723394938	-0.0468543	-10.227	0.76555	0.116026	0.9999	+	ENSG00000072958.9
AP1M2	chr19:10572670-10587315	TKS4_WT	TKS4_KO	41754.1	41126.3	0.984964	-0,0218565326457911	-0.00657947	-1.50356	0.9673	0.0144388	0.9999	-	ENSG00000129354.12
AP1S1	chr7:101154475-101161276	TKS4_WT	TKS4_KO	75596.4	81495.4	1.07803	0,10840095767297	0.0326319	7.80327	0.8552	0.0679323	0.9999	+	ENSG00000106367.15
AP1S2	chrX:15790471-15854966	TKS4_WT	TKS4_KO	25353.6	19975.7	0.787885	-0,343943020713919	-0.103537	-21.2115	0.60545	0.217922	0.9999	-	ENSG00000182287.15
AP1S3	chr2:223755325-223837582	TKS4_WT	TKS4_KO	146415	178066	1.21617	0,282348535603847	0.0849954	21.6173	0.5929	0.227019	0.9999	-	ENSG00000152056.17
AP2A1	chr19:49767000-49817376	TKS4_WT	TKS4_KO	77219	100951	1.30733	0,38662698621941	0.116386	30.7333	0.4919	0.308123	0.9999	+	ENSG00000196961.13
AP2A2	chr11:925849-1012245	TKS4_WT	TKS4_KO	65254.9	41620.5	0.637815	-0,648790685765386	-0.195305	-36.2185	0.23155	0.635355	0.9999	+	ENSG00000183020.15
AP2B1	chr17:35587264-35726413	TKS4_WT	TKS4_KO	244188	345866	1.41639	0,502220719868997	0.151184	41.6392	0.44675	0.349935	0.9999	+	ENSG00000006125.18
AP2M1	chr3:184174845-184184091	TKS4_WT	TKS4_KO	251048	232217	0.92499	-0,112489593065189	-0.0338627	-7.50095	0.85945	0.0657794	0.9999	+	ENSG00000161203.14
AP2S1	chr19:46838166-46850846	TKS4_WT	TKS4_KO	173004	145052	0.838432	-0,254235046109054	-0.0765324	-16.1568	0.70345	0.152767	0.9999	-	ENSG00000042753.12
AP3B1	chr5:78000521-78294755	TKS4_WT	TKS4_KO	90480.9	88122.7	0.973937	-0,038099538412426	-0.0114691	-2.60629	0.94475	0.0246831	0.9999	-	ENSG00000132842.15
AP3D1	chr19:2100987-2151566	TKS4_WT	TKS4_KO	145471	172684	1.18707	0,247402683155701	0.0744756	18.7068	0.6786	0.168386	0.9999	-	ENSG00000065000.19
AP3M1	chr10:73998113-74151067	TKS4_WT	TKS4_KO	70855.6	66285.7	0.935504	-0,0961840719479661	-0.0289543	-6.44959	0.94465	0.0247291	0.9999	-	ENSG00000185009.13
AP3M2	chr8:42153034-42171183	TKS4_WT	TKS4_KO	39500.5	40888.2	1.03513	0,0498135141544748	0.0149954	3.51311	0.9282	0.0323584	0.9999	+	ENSG00000070718.12
AP3S1	chr5:115841605-115914081	TKS4_WT	TKS4_KO	403419	413168	1.02417	0,0344494800909368	0.0103703	2.41659	0.95145	0.021614	0.9999	+	ENSG00000177879.17
AP3S2	chr15:89830598-89912952	TKS4_WT	TKS4_KO	54104.5	52542.8	0.971136	-0,0422554285877573	-0.0127202	-2.88645	0.9391	0.0272882	0.9999
AP4B1	chr1:113812611-113914086	TKS4_WT	TKS4_KO	17857.5	12602.8	0.705744	-0,502782455859734	-0.151353	-29.4256	0.5894	0.22959	0.9999	-	ENSG00000134262.13
AP4E1	chr15:50908568-51005900	TKS4_WT	TKS4_KO	36332.6	32300.2	0.889015	-0,169721016552702	-0.0510911	-11.0985	0.7578	0.120445	0.9999	+	ENSG00000081014.11
AP4M1	chr7:100101412-100128495	TKS4_WT	TKS4_KO	15385.8	16600.2	1.07893	0,1096004773855	0.032993	7.89294	0.9269	0.0329671	0.9999	+	ENSG00000221838.10
AP4S1	chr14:30893803-31096450	TKS4_WT	TKS4_KO	7779.66	8822.67	1.13407	0,181506026155022	0.0546388	13.4067	0.9065	0.0426322	0.9999	+	ENSG00000100478.16
AP5B1	chr11:65773897-65780976	TKS4_WT	TKS4_KO	39676.2	48155.9	1.21372	0,279438067994528	0.0841192	21.3722	0.63905	0.194465	0.9999	-	ENSG00000254470.3
AP5M1	chr14:57268914-57298742	TKS4_WT	TKS4_KO	52028.6	42039.2	0.808002	-0,307569013223477	-0.0925875	-19.1998	0.56485	0.248067	0.9999	+	ENSG00000053770.12
AP5S1	chr20:3820546-3828838	TKS4_WT	TKS4_KO	12221.8	13619	1.11432	0,156162785922508	0.0470097	11.4319	0.7801	0.10785	0.9999	+	ENSG00000125843.11
AP5Z1	chr7:4775622-4794397	TKS4_WT	TKS4_KO	14837	15219.3	1.02577	0,0367023479336554	0.0110485	2.57665	0.9517	0.0214999	0.9999	+	ENSG00000242802.9
APAF1	chr12:98645140-99984936	TKS4_WT	TKS4_KO	35363.3	39024	1.10352	0,142108371447492	0.0427789	10.3517	0.79185	0.101357	0.9999	+	ENSG00000120868.14
APBA1	chr9:69427531-69673012	TKS4_WT	TKS4_KO	183.711	226.2	1.23116	0,300013478638423	0.0903131	23.1156	0.82575	0.0831514	0.9999	-	ENSG00000107282.8
APBA2	chr15:28885478-29679163	TKS4_WT	TKS4_KO	284.984	114.293	0.401261	-1,31738829938589	-0.396573	-59.8739	1	0	1	+	ENSG00000034053.15
APBA3	chr19:3708383-3761696	TKS4_WT	TKS4_KO	13811.4	19839	1.43642	0,522476567191638	0.157281	43.6419	0.62115	0.206804	0.9999	-	ENSG00000011132.12
APBB1	chr11:6395123-6419453	TKS4_WT	TKS4_KO	12530.1	9904.18	0.790433	-0,339285436225023	-0.102135	-20.9567	0.5683	0.245422	0.9999	-	ENSG00000166313.20
APBB2	chr4:40749873-41216714	TKS4_WT	TKS4_KO	155255	143295	0.922965	-0,115651383303506	-0.0348145	-7.70345	0.83605	0.0777677	0.9999	-	ENSG00000163697.17
APBB3	chr5:140558267-140564604	TKS4_WT	TKS4_KO	4142.15	8097.33	1.95484	0,967049463252248	0.291111	95.4839	0.1346	0.870955	0.9999	-	ENSG00000113108.20
APC	chr5:112707497-112846239	TKS4_WT	TKS4_KO	92545.8	78447.6	0.847663	-0,238437927157456	-0.071777	-15.2337	0.68925	0.161623	0.9999	+	ENSG00000134982.17
APC2	chr19:1446267-1479215	TKS4_WT	TKS4_KO	7046.09	6468.18	0.917983	-0,123461245733491	-0.0371655	-8.20174	0.94965	0.0224364	0.9999	+	ENSG00000115266.12
APCDD1	chr18:10454634-10489949	TKS4_WT	TKS4_KO	54.9594	0	0.00181622	-9,10484507828174	-2.74083	-99.8184	1	0	1	+	ENSG00000154856.13
APCDD1L	chr20:58459100-58619892	TKS4_WT	TKS4_KO	64.376	134.05	2.08062	1,05701290560697	0.318193	108.062	1	0	1	-	ENSG00000198768.11
APEH	chr3:49673101-49723951	TKS4_WT	TKS4_KO	154024	184294	1.19653	0,258853779539099	0.0779228	19.6528	0.7127	0.147093	0.9999	+	ENSG00000164062.13
APEX1	chr14:20455225-20461612	TKS4_WT	TKS4_KO	112475	113508	1.00918	0,0131896030986204	0.00397047	0.918426	0.9842	0.00691664	0.9999	+	ENSG00000100823.12
APEX2	chrX:55000362-55078909	TKS4_WT	TKS4_KO	31099.4	36013.3	1.15801	0,211642424076207	0.0637107	15.8006	0.69835	0.155927	0.9999	+	ENSG00000169188.5
APH1A	chr1:150257257-150282179	TKS4_WT	TKS4_KO	74739.6	76491.4	1.02344	0,0334246665982095	0.0100618	2.34387	0.9524	0.0211806	0.9999	-	ENSG00000117362.13
APH1B	chr15:63277549-63309126	TKS4_WT	TKS4_KO	6299.6	7092.47	1.12586	0,171025357011332	0.0514838	12.5858	0.7883	0.103308	0.9999	+	ENSG00000138613.14
API5	chr11:43311969-43344530	TKS4_WT	TKS4_KO	219831	179003	0.814276	-0,296410929542568	-0.0892286	-18.5724	0.6618	0.179273	0.9999	+	ENSG00000166181.13
APIP	chr11:34882294-34996128	TKS4_WT	TKS4_KO	20008.4	19305.5	0.96487	-0,0515936225461904	-0.0155312	-3.51301	0.96155	0.0170281	0.9999	-	ENSG00000149089.13
APLF	chr2:68467584-68580162	TKS4_WT	TKS4_KO	1413.96	1276.18	0.902564	-0,14789846323728	-0.0445219	-9.74358	0.84955	0.0708111	0.9999	+	ENSG00000169621.10
APLN	chrX:129645258-129654956	TKS4_WT	TKS4_KO	339.173	598.695	1.76494	0,819615552632285	0.246729	76.4936	0.49855	0.302291	0.9999	-	ENSG00000171388.12
APLP1	chr19:35825371-35879795	TKS4_WT	TKS4_KO	16431.9	25992.4	1.58182	0,661587314419043	0.199158	58.1822	0.26185	0.581947	0.9999	+	ENSG00000105290.13
APLP2	chr11:130069893-130144811	TKS4_WT	TKS4_KO	185656	244407	1.31645	0,396653478095332	0.119405	31.6451	0.5656	0.247491	0.9999	+	ENSG00000084234.18
APMAP	chr20:24962924-24992930	TKS4_WT	TKS4_KO	64013.7	89247	1.39419	0,479422338196987	0.144321	39.4185	0.35995	0.443758	0.9999	-	ENSG00000101474.12
APOA1	chr11:116835750-117098453	TKS4_WT	TKS4_KO	0	233.435	2335.35	11,1894230681835	3.36835	233435	0.0299	1.52433	0.9999	-	ENSG00000118137.10
APOBEC3H	chr22:39097202-39104067	TKS4_WT	TKS4_KO	385.486	416.12	1.07945	0,110293619805501	0.0332017	7.94479	0.90495	0.0433754	0.9999	+	ENSG00000100298.16
APOBR	chr16:28494642-28498964	TKS4_WT	TKS4_KO	32.188	0	0.00309713	-8,33485426933163	-2.50904	-99.6903	1	0	1	+	ENSG00000184730.12
APOC1	chr19:44914324-44919346	TKS4_WT	TKS4_KO	526.822	44.2855	0.0842354	-3,56942906191219	-1.07451	-91.5765	0.2602	0.584693	0.9999	+	ENSG00000130208.10
APOD	chr3:195568704-195583940	TKS4_WT	TKS4_KO	201.774	368.255	1.82468	0,867641712389289	0.261186	82.4678	0.44185	0.354725	0.9999	-	ENSG00000189058.9
APOE	chr19:44905795-44909393	TKS4_WT	TKS4_KO	578.614	765.389	1.32274	0,403531100903461	0.121475	32.2741	0.625	0.20412	0.9999	+	ENSG00000130203.10
APOL1	chr22:36253070-36273198	TKS4_WT	TKS4_KO	54.9594	45.4787	0.82781	-0,272629112001643	-0.0820695	-17.219	1	0	1	+	ENSG00000100342.21
APOL2	chr22:36226208-36239954	TKS4_WT	TKS4_KO	8788.44	8020.8	0.912654	-0,131859390894964	-0.0396936	-8.73456	0.8255	0.0832829	0.9999	-	ENSG00000128335.14
APOL3	chr22:36140322-36166177	TKS4_WT	TKS4_KO	59.6677	0	0.00167314	-9,22322221534836	-2.77647	-99.8327	5e-05	4.30103	0.0171564	-	ENSG00000128284.20
APOL6	chr22:35648315-35668406	TKS4_WT	TKS4_KO	528.363	456.641	0.864282	-0,210426164686217	-0.0633446	-13.5718	0.8178	0.0873529	0.9999	+	ENSG00000221963.6
APOLD1	chr12:12725916-12791466	TKS4_WT	TKS4_KO	8433.52	8912.89	1.05684	0,0797574687732124	0.0240094	5.68404	0.89385	0.0487354	0.9999	+	ENSG00000178878.13
APOM	chr6:31639027-31660900	TKS4_WT	TKS4_KO	343.881	456.716	1.32803	0,409284303052399	0.123207	32.8027	0.86405	0.0634611	0.9999	+	ENSG00000204444.11
APOO	chrX:23833347-23939520	TKS4_WT	TKS4_KO	11940	11569.3	0.968953	-0,0455008725657551	-0.0136971	-3.10466	0.9483	0.0230542	0.9999	-	ENSG00000184831.14
APOOL	chrX:85003851-85243779	TKS4_WT	TKS4_KO	37258.6	37687.4	1.01151	0,0165087591870646	0.00496963	1.15087	0.9756	0.0107282	0.9999	+	ENSG00000155008.16
APP	chr21:25880549-26171128	TKS4_WT	TKS4_KO	206107	306046	1.48489	0,570354779891283	0.171694	48.4889	0.4172	0.379656	0.9999	-	ENSG00000142192.21
APPBP2	chr17:60443148-60526242	TKS4_WT	TKS4_KO	91192.1	84631	0.928052	-0,107722512402223	-0.0324277	-7.1948	0.8414	0.0749975	0.9999	-	ENSG00000062725.10
APPL1	chr3:57227728-57293048	TKS4_WT	TKS4_KO	75874	58918.2	0.776527	-0,364891694421833	-0.109843	-22.3473	0.52985	0.275847	0.9999
APPL2	chr12:105173296-105236174	TKS4_WT	TKS4_KO	26635.4	28474.6	1.06905	0,0963302789191728	0.0289983	6.90507	0.84405	0.0736318	0.9999	-	ENSG00000136044.12
APRT	chr16:88809338-88811928	TKS4_WT	TKS4_KO	121765	122487	1.00593	0,00852912566064455	0.00256752	0.592945	0.9875	0.0054629	0.9999	-	ENSG00000198931.11
APTX	chr9:32883871-33025120	TKS4_WT	TKS4_KO	49759	41351.1	0.831028	-0,267031194870147	-0.0803844	-16.8972	0.6133	0.212327	0.9999	-	ENSG00000137074.20
AQP1	chr7:30911852-30925516	TKS4_WT	TKS4_KO	1598.44	1990.95	1.24554	0,316774606128707	0.0953587	24.5543	0.68565	0.163898	0.9999	+	ENSG00000240583.14
AQP11	chr11:77589952-77610356	TKS4_WT	TKS4_KO	59.6677	307.85	5.15245	2,3652581974814	0.712014	415.245	0.0649	1.18776	0.9999	+	ENSG00000178301.4
AQP3	chr9:33441153-33447596	TKS4_WT	TKS4_KO	10034.2	9432.17	0.940003	-0,089263055403621	-0.0268709	-5.99972	0.8887	0.0512448	0.9999	-	ENSG00000165272.16
AQP4	chr18:26852037-27189680	TKS4_WT	TKS4_KO	0	126.173	1262.73	10,3023304762001	3.10131	126173	5e-05	4.30103	0.0171564	-	ENSG00000171885.18
AQP5	chr12:49950736-49978444	TKS4_WT	TKS4_KO	59.6677	0	0.00167314	-9,22322221534836	-2.77647	-99.8327	0.14245	0.846338	0.9999	+	ENSG00000161798.7
AQP7	chr9:33383134-33410302	TKS4_WT	TKS4_KO	64.376	134.05	2.08062	1,05701290560697	0.318193	108.062	1	0	1	-	ENSG00000165269.13
AQP8	chr16:25216916-25228932	TKS4_WT	TKS4_KO	27.4797	0	0.00362586	-8,10746295370181	-2.44059	-99.6374	1	0	1	+	ENSG00000103375.11
AQR	chr15:34851781-34969742	TKS4_WT	TKS4_KO	95446.2	64845.9	0.679398	-0,5576716871289	-0.167876	-32.0602	0.34715	0.459483	0.9999	-	ENSG00000021776.11
ARAF	chrX:47561204-47619857	TKS4_WT	TKS4_KO	25999.3	29807.9	1.14649	0,197221249485096	0.0593695	14.6488	0.7995	0.0971815	0.9999	+	ENSG00000078061.14
ARAP1	chr11:72685068-72752408	TKS4_WT	TKS4_KO	37618.4	52558.3	1.39714	0,482479033345955	0.145241	39.7142	0.44795	0.34877	0.9999	-	ENSG00000186635.15
ARAP2	chr4:36005185-36274215	TKS4_WT	TKS4_KO	37034.4	32952.8	0.889789	-0,168464425292713	-0.0507128	-11.0211	0.7361	0.133063	0.9999	-	ENSG00000047365.13
ARAP3	chr5:141653400-141682230	TKS4_WT	TKS4_KO	19363.3	25899.7	1.33756	0,419608661134874	0.126315	33.7565	0.5187	0.285084	0.9999	-	ENSG00000120318.16
ARC	chr8:142611048-142614479	TKS4_WT	TKS4_KO	22570.6	26863.6	1.1902	0,251206861724466	0.0756208	19.0202	0.66245	0.178847	0.9999	-	ENSG00000198576.4
ARCN1	chr11:118436491-118603033	TKS4_WT	TKS4_KO	185319	181570	0.97977	-0,0294849342407353	-0.00887585	-2.023	0.9745	0.0112182	0.9999	+	ENSG00000095139.15
AREG	chr4:74445135-74455005	TKS4_WT	TKS4_KO	163794	124562	0.76048	-0,3950182186192	-0.118912	-23.952	0.45455	0.342418	0.9999	+	ENSG00000109321.11
AREL1	chr14:74661255-74738620	TKS4_WT	TKS4_KO	74447.1	89123	1.19713	0,25958182604114	0.0781419	19.7132	0.7598	0.119301	0.9999	-	ENSG00000119682.18
ARF1	chr1:228082707-228099212	TKS4_WT	TKS4_KO	348273	305335	0.876712	-0,18982560095907	-0.0571432	-12.3288	0.7702	0.113396	0.9999	+	ENSG00000143761.16
ARF3	chr12:48930251-48957526	TKS4_WT	TKS4_KO	153026	206663	1.35051	0,43350307770947	0.130497	35.0509	0.4884	0.311224	0.9999	-	ENSG00000134287.10
ARF4	chr3:57556273-57693118	TKS4_WT	TKS4_KO	173306	152669	0.880922	-0,182914342799071	-0.0550627	-11.9078	0.8599	0.0655521	0.9999	-	ENSG00000168374.11
ARF5	chr7:127588410-127592205	TKS4_WT	TKS4_KO	119303	140417	1.17698	0,235087106950679	0.0707683	17.6978	0.6765	0.169732	0.9999	+	ENSG00000004059.11
ARF6	chr14:49893081-49897054	TKS4_WT	TKS4_KO	110652	134836	1.21856	0,285175973075255	0.0858465	21.8559	0.60265	0.219935	0.9999	+	ENSG00000165527.8
ARFGAP1	chr20:63272812-63289790	TKS4_WT	TKS4_KO	38558.7	49003.5	1.27088	0,345827585535076	0.104104	27.088	0.5785	0.237697	0.9999	+	ENSG00000101199.13
ARFGAP2	chr11:46936523-47176880	TKS4_WT	TKS4_KO	56492.6	50689.5	0.897277	-0,156374674751145	-0.0470735	-10.2723	0.8072	0.0930188	0.9999	-	ENSG00000149182.15
ARFGAP3	chr22:42796501-42857294	TKS4_WT	TKS4_KO	25667.5	27741.3	1.08079	0,112092190906657	0.0337431	8.07945	0.8331	0.0793029	0.9999	-	ENSG00000242247.11
ARFGEF1	chr8:67062416-67343824	TKS4_WT	TKS4_KO	65726	60672.3	0.92311	-0,115426001408685	-0.0347467	-7.68903	0.89475	0.0482983	0.9999	-	ENSG00000066777.9
ARFGEF2	chr20:48921710-49036693	TKS4_WT	TKS4_KO	98485.2	94044.5	0.95491	-0,0665632955387434	-0.0200375	-4.509	0.8994	0.0460471	0.9999	+	ENSG00000124198.10
ARFGEF3	chr6:138161689-138344663	TKS4_WT	TKS4_KO	21561.9	23286.4	1.07998	0,111002813766617	0.0334152	7.99787	0.83755	0.0769893	0.9999	+	ENSG00000112379.9
ARFIP1	chr4:152779953-152912357	TKS4_WT	TKS4_KO	59827.2	49856.8	0.833347	-0,263010773987454	-0.0791741	-16.6653	0.66375	0.177995	0.9999	+	ENSG00000164144.16
ARFIP2	chr11:6474680-6481331	TKS4_WT	TKS4_KO	67456.6	63669.5	0.943859	-0,083357042435695	-0.025093	-5.61412	0.87705	0.0569756	0.9999	-	ENSG00000132254.13
ARFRP1	chr20:63657809-63739107	TKS4_WT	TKS4_KO	16531.1	17426.4	1.05416	0,0760913888930158	0.0229058	5.41582	0.94535	0.0244074	0.9999	-	ENSG00000101246.20
ARG2	chr14:67619919-67674632	TKS4_WT	TKS4_KO	7740.36	6179.66	0.798371	-0,324868495337808	-0.0977952	-20.1629	0.79005	0.102345	0.9999	+	ENSG00000081181.8
ARGLU1	chr13:106541672-106568164	TKS4_WT	TKS4_KO	81455.8	98760.3	1.21244	0,277913480126032	0.0836603	21.244	0.59225	0.227495	0.9999	-	ENSG00000134884.15
ARHGAP1	chr11:46677076-46700660	TKS4_WT	TKS4_KO	36346	36040.4	0.991592	-0,0121815425477768	-0.00366701	-0.840805	0.9828	0.00753485	0.9999	-	ENSG00000175220.12
ARHGAP10	chr4:147732062-148072781	TKS4_WT	TKS4_KO	44075.2	37650.8	0.85424	-0,227286038111743	-0.0684199	-14.576	0.64095	0.193176	0.9999	+	ENSG00000071205.12
ARHGAP11B	chr15:30626127-30773009	TKS4_WT	TKS4_KO	36587.6	29620.6	0.809581	-0,304752991910302	-0.0917398	-19.0419	0.62545	0.203807	0.9999
ARHGAP12	chr10:31805397-32056425	TKS4_WT	TKS4_KO	168150	179219	1.06583	0,0919747617494322	0.0276872	6.58281	0.93365	0.0298159	0.9999	-	ENSG00000165322.18
ARHGAP17	chr16:24916828-25015601	TKS4_WT	TKS4_KO	30991.2	32302.2	1.0423	0,0597736185765332	0.0179937	4.23022	0.91165	0.0401719	0.9999	-	ENSG00000140750.17
ARHGAP18	chr6:129576131-129710225	TKS4_WT	TKS4_KO	173719	229371	1.32036	0,400927244358732	0.120691	32.0356	0.47195	0.326104	0.9999	-	ENSG00000146376.11
ARHGAP21	chr10:24583609-24725421	TKS4_WT	TKS4_KO	87047.2	76688.2	0.880996	-0,18279306078857	-0.0550262	-11.9004	0.7289	0.137332	0.9999	-	ENSG00000107863.20
ARHGAP22	chr10:48306672-48656265	TKS4_WT	TKS4_KO	7591.06	8784.57	1.15722	0,210667732041511	0.0634173	15.7224	0.81495	0.088869	0.9999	-	ENSG00000128805.15
ARHGAP23	chr17:38419285-38512389	TKS4_WT	TKS4_KO	57520.3	51880.1	0.901944	-0,148889667151548	-0.0448203	-9.80556	0.80375	0.094879	0.9999	+	ENSG00000275832.5
ARHGAP24	chr4:85475149-86002666	TKS4_WT	TKS4_KO	1347.19	2867.82	2.12866	1,08994436107353	0.328106	112.866	0.35505	0.44971	0.9999	+	ENSG00000138639.18
ARHGAP26	chr5:142770369-143229011	TKS4_WT	TKS4_KO	62811.3	59430.2	0.946171	-0,0798277622598623	-0.0240306	-5.38294	0.87895	0.0560358	0.9999	+	ENSG00000145819.18
ARHGAP27	chr17:45393901-45432870	TKS4_WT	TKS4_KO	30962.4	40416.5	1.30534	0,38442599828921	0.115724	30.534	0.48885	0.310824	0.9999	-	ENSG00000159314.12
ARHGAP29	chr1:94168904-94336179	TKS4_WT	TKS4_KO	698150	865766	1.24009	0,310440066862062	0.0934518	24.0086	0.6705	0.173601	0.9999	-	ENSG00000137962.13
ARHGAP30	chr1:161046941-161069971	TKS4_WT	TKS4_KO	257.504	226.2	0.87848	-0,186918410770706	-0.056268	-12.152	1	0	1	-	ENSG00000186517.14
ARHGAP31	chr3:119294288-119420714	TKS4_WT	TKS4_KO	6761.19	6850.39	1.01319	0,0189086570331187	0.00569207	1.31927	0.97465	0.0111513	0.9999	+	ENSG00000031081.11
ARHGAP32	chr11:128965059-129283164	TKS4_WT	TKS4_KO	56037.8	56596.8	1.00998	0,0143201417192327	0.00431079	0.997539	0.9798	0.00886256	0.9999	-	ENSG00000134909.19
ARHGAP33	chr19:35775514-35788822	TKS4_WT	TKS4_KO	6709.31	7950.78	1.18503	0,244928639216893	0.0737309	18.5034	0.75085	0.124447	0.9999	+	ENSG00000004777.19
ARHGAP35	chr19:46860996-47005077	TKS4_WT	TKS4_KO	170335	168611	0.989879	-0,014676238881874	-0.00441799	-1.01212	0.9779	0.00970555	0.9999	+	ENSG00000160007.19
ARHGAP39	chr8:144529178-144714830	TKS4_WT	TKS4_KO	24664.2	29644.4	1.20192	0,265340121027223	0.0798753	20.1919	0.70025	0.154747	0.9999	-	ENSG00000147799.12
ARHGAP4	chrX:153907377-153926264	TKS4_WT	TKS4_KO	20497.8	42051.7	2.05152	1,0366914415387	0.312075	105.152	0.10175	0.992466	0.9999	-	ENSG00000089820.16
ARHGAP40	chr20:38601808-38650653	TKS4_WT	TKS4_KO	2235.18	1917.54	0.857897	-0,22112365285661	-0.0665649	-14.2103	0.77935	0.108267	0.9999	+	ENSG00000124143.11
ARHGAP42	chr11:100684160-100993941	TKS4_WT	TKS4_KO	43693.6	68433.3	1.56621	0,647275348114241	0.194849	56.6207	0.2421	0.616005	0.9999	+	ENSG00000165895.19
ARHGAP44	chr17:12665889-13018027	TKS4_WT	TKS4_KO	6762.73	8295.15	1.22659	0,294658372782735	0.088701	22.6594	0.8303	0.080765	0.9999	+	ENSG00000006740.18
ARHGAP45	chr19:1065958-1095387	TKS4_WT	TKS4_KO	22113.6	28085.7	1.27006	0,344900464545668	0.103825	27.0063	0.78705	0.103998	0.9999	+	ENSG00000180448.11
ARHGAP5	chr14:32072587-32159728	TKS4_WT	TKS4_KO	203743	169672	0.832775	-0,264001846510765	-0.0794725	-16.7225	0.65335	0.184854	0.9999	+	ENSG00000100852.14
ARHGDIA	chr17:81867718-81871337	TKS4_WT	TKS4_KO	164706	186344	1.13137	0,17807515416326	0.053606	13.1373	0.78065	0.107544	0.9999	-	ENSG00000141522.12
ARHGDIB	chr12:14942014-14961601	TKS4_WT	TKS4_KO	1205.94	840.064	0.69663	-0,521534882483117	-0.156998	-30.337	0.5085	0.293709	0.9999	-	ENSG00000111348.9
ARHGEF1	chr19:41883183-41907452	TKS4_WT	TKS4_KO	48939.1	63985.9	1.30746	0,386765762907246	0.116428	30.7459	0.5321	0.274007	0.9999	+	ENSG00000076928.18
ARHGEF10	chr8:1823925-1958641	TKS4_WT	TKS4_KO	76993.5	83608	1.08591	0,118904189679504	0.0357937	8.59097	0.8376	0.0769633	0.9999	+	ENSG00000104728.16
ARHGEF10L	chr1:17513441-17697875	TKS4_WT	TKS4_KO	13249.9	19285.5	1.45552	0,54153167110075	0.163017	45.5517	0.39585	0.402469	0.9999	+	ENSG00000074964.17
ARHGEF11	chr1:156920607-157046903	TKS4_WT	TKS4_KO	61057.5	60305.1	0.987677	-0,0178884741605491	-0.00538497	-1.23228	0.974	0.011441	0.9999	-	ENSG00000132694.19
ARHGEF12	chr11:120336275-120489937	TKS4_WT	TKS4_KO	382319	334374	0.874594	-0,193314173264124	-0.0581934	-12.5406	0.7474	0.126447	0.9999	+	ENSG00000196914.9
ARHGEF16	chr1:3454588-3481115	TKS4_WT	TKS4_KO	31068.6	31077.9	1.0003	0,000431786852091066	0.000129981	0.0299337	0.9996	0.000173753	0.9999	+	ENSG00000130762.15
ARHGEF17	chr11:73305960-73369388	TKS4_WT	TKS4_KO	34589.4	44675.2	1.29159	0,369143257830948	0.111123	29.1586	0.56495	0.24799	0.9999	+	ENSG00000110237.5
ARHGEF18	chr19:7348900-7494977	TKS4_WT	TKS4_KO	39950.2	41286.9	1.03346	0,0474812562078438	0.0142933	3.34591	0.9351	0.0291419	0.9999	+	ENSG00000104880.19
ARHGEF19	chr1:16197853-16212700	TKS4_WT	TKS4_KO	39784	50836.8	1.27782	0,353684095882481	0.10647	27.782	0.4956	0.304869	0.9999	-	ENSG00000142632.17
ARHGEF2	chr1:155946838-155991262	TKS4_WT	TKS4_KO	36872.6	45859.2	1.24372	0,314661272166213	0.0947225	24.372	0.63825	0.195009	0.9999	-	ENSG00000116584.22
ARHGEF25	chr12:57610115-57617245	TKS4_WT	TKS4_KO	1975.28	4269.27	2.16129	1,11189298907656	0.334713	116.129	0.1046	0.980468	0.9999	+	ENSG00000240771.8
ARHGEF26	chr3:154024400-154257827	TKS4_WT	TKS4_KO	17228.4	16200.2	0.94032	-0,0887765692952746	-0.0267244	-5.96802	0.8825	0.0542853	0.9999	+	ENSG00000114790.13
ARHGEF28	chr5:73626178-73941993	TKS4_WT	TKS4_KO	22023.7	21987.4	0.998352	-0,00237983617205485	-0.000716402	-0.164822	0.9973	0.00117418	0.9999	+	ENSG00000214944.10
ARHGEF3	chr3:56727418-57079308	TKS4_WT	TKS4_KO	24834.4	32312.3	1.30111	0,379742209719449	0.114314	30.1109	0.5607	0.251269	0.9999	-	ENSG00000163947.12
ARHGEF33	chr2:38889874-38975454	TKS4_WT	TKS4_KO	128.752	89.7641	0.697421	-0,519898139786418	-0.156505	-30.2579	1	0	1	+	ENSG00000214694.12
ARHGEF34P	chr7:144186082-144380632	TKS4_WT	TKS4_KO	13022.4	11710.6	0.899267	-0,153179122449714	-0.0461115	-10.0733	0.9447	0.0247061	0.9999
ARHGEF35	chr7:144186082-144380632	TKS4_WT	TKS4_KO	7087.87	5880.2	0.829617	-0,269482737591289	-0.0811224	-17.0383	0.8391	0.0761863	0.9999	-	ENSG00000213214.6
ARHGEF37	chr5:149552056-149634968	TKS4_WT	TKS4_KO	6552.4	7846.22	1.19745	0,259970726142333	0.078259	19.7454	0.6907	0.160711	0.9999	+	ENSG00000183111.12
ARHGEF39	chr9:35658291-35665205	TKS4_WT	TKS4_KO	28641.7	22242.1	0.776564	-0,364822668285118	-0.109823	-22.3436	0.61295	0.212575	0.9999	-	ENSG00000137135.18
ARHGEF4	chr2:130836913-131093468	TKS4_WT	TKS4_KO	28194.9	37408	1.32676	0,407911348674188	0.122794	32.6764	0.67775	0.16893	0.9999	+	ENSG00000136002.20
ARHGEF40	chr14:21016762-21104722	TKS4_WT	TKS4_KO	9245.92	10353.6	1.1198	0,163242033240104	0.0491407	11.9801	0.9022	0.0446972	0.9999	+	ENSG00000165801.10
ARHGEF5	chr7:144186082-144380632	TKS4_WT	TKS4_KO	30087.1	29079.6	0.966514	-0,0491374658270188	-0.0147919	-3.3486	0.94715	0.0235812	0.9999	+	ENSG00000050327.15
ARHGEF6	chrX:136665546-136780945	TKS4_WT	TKS4_KO	2015.35	2274.85	1.12876	0,174732844638022	0.0525998	12.8755	0.7966	0.0987597	0.9999	-	ENSG00000129675.16
ARHGEF7	chr13:111113811-111305734	TKS4_WT	TKS4_KO	78310.1	87456.1	1.11679	0,159360431656427	0.0479723	11.6792	0.7601	0.119129	0.9999	+	ENSG00000102606.19
ARHGEF9	chrX:63634966-63785546	TKS4_WT	TKS4_KO	12982.4	16364.7	1.26053	0,334027745379129	0.100552	26.0528	0.55465	0.255981	0.9999	-	ENSG00000131089.17
ARID1A	chr1:26696014-26782104	TKS4_WT	TKS4_KO	132909	121746	0.91601	-0,126564328292453	-0.0380997	-8.39897	0.8233	0.0844419	0.9999	+	ENSG00000117713.21
ARID1B	chr6:156776025-157210779	TKS4_WT	TKS4_KO	64220	55158.2	0.858895	-0,219446918429047	-0.0660601	-14.1105	0.7303	0.136499	0.9999	+	ENSG00000049618.24
ARID2	chr12:45729705-45908037	TKS4_WT	TKS4_KO	111692	91776.7	0.821695	-0,283325737376175	-0.0852895	-17.8305	0.6286	0.201626	0.9999	+	ENSG00000189079.17
ARID3A	chr19:925732-975939	TKS4_WT	TKS4_KO	19467.7	15253.8	0.783545	-0,351911711433935	-0.105936	-21.6455	0.59235	0.227422	0.9999	+	ENSG00000116017.11
ARID3B	chr15:74541219-74598131	TKS4_WT	TKS4_KO	9878.04	10017.3	1.0141	0,0201967870791334	0.00607984	1.40978	0.97295	0.0119095	0.9999	+	ENSG00000179361.18
ARID3C	chr9:34621048-34633112	TKS4_WT	TKS4_KO	854.181	877.168	1.02691	0,0383069486312669	0.0115315	2.6908	0.96725	0.0144613	0.9999	-	ENSG00000205143.5
ARID4A	chr14:58298384-58395848	TKS4_WT	TKS4_KO	17177.2	16971.3	0.988013	-0,0173977052573655	-0.00523723	-1.19867	0.9797	0.00890689	0.9999	+	ENSG00000032219.19
ARID4B	chr1:235166894-235344532	TKS4_WT	TKS4_KO	57077.7	53463.5	0.936679	-0,0943727433263251	-0.028409	-6.33206	0.88445	0.0533267	0.9999	-	ENSG00000054267.22
ARID5A	chr2:96536751-96552638	TKS4_WT	TKS4_KO	9557.7	11344.3	1.18693	0,247229823402321	0.0744236	18.6926	0.72055	0.142336	0.9999	+	ENSG00000196843.17
ARID5B	chr10:61901253-62096944	TKS4_WT	TKS4_KO	33168	18601	0.560813	-0,834408431727898	-0.251182	-43.9187	0.1255	0.901356	0.9999	+	ENSG00000150347.17
ARIH2	chr3:48917787-48986382	TKS4_WT	TKS4_KO	151885	135493	0.892076	-0,164760963660084	-0.049598	-10.7924	0.7952	0.0995236	0.9999	+	ENSG00000177479.20
ARL1	chr12:101393115-101407820	TKS4_WT	TKS4_KO	64028.6	64446.5	1.00653	0,00938552988680623	0.00282533	0.652676	0.98575	0.00623321	0.9999	-	ENSG00000120805.14
ARL10	chr5:176365473-176416569	TKS4_WT	TKS4_KO	156.232	184.301	1.17955	0,238233361940148	0.0717154	17.9547	1	0	1	+	ENSG00000175414.7
ARL11	chr13:49628455-49633872	TKS4_WT	TKS4_KO	32.188	22.1427	0.688884	-0,537666154796718	-0.161854	-31.1116	1	0	1	+	ENSG00000152213.4
ARL13B	chr3:93980138-94055678	TKS4_WT	TKS4_KO	11026.1	8539.28	0.774463	-0,368732443097348	-0.111	-22.5537	0.57365	0.241353	0.9999	+	ENSG00000169379.17
ARL14	chr3:160677159-160678448	TKS4_WT	TKS4_KO	357.236	120.444	0.337341	-1,56772142279204	-0.471931	-66.2659	0.27845	0.555253	0.9999	+	ENSG00000179674.4
ARL14EP	chr11:30323103-30338458	TKS4_WT	TKS4_KO	28117.3	24674.7	0.877563	-0,188424804329958	-0.0567215	-12.2437	0.7332	0.134778	0.9999	+	ENSG00000152219.5
ARL14EPL	chr5:116032471-116060023	TKS4_WT	TKS4_KO	14720.7	13576.6	0.92228	-0,116723220893344	-0.0351372	-7.772	0.84415	0.0735804	0.9999	+	ENSG00000268223.7
ARL15	chr5:53883941-54310590	TKS4_WT	TKS4_KO	17183.5	15018.6	0.874014	-0,194272375390901	-0.0584818	-12.5986	0.7272	0.138346	0.9999	-	ENSG00000185305.12
ARL16	chr17:81681164-81683797	TKS4_WT	TKS4_KO	28541.2	27910.7	0.977909	-0,0322275716385364	-0.00970147	-2.20908	0.95575	0.0196557	0.9999	-	ENSG00000214087.9
ARL17A	chr17:46500212-47100283	TKS4_WT	TKS4_KO	9478.43	7884.45	0.831833	-0,265634915233847	-0.0799641	-16.8167	0.8596	0.0657036	0.9999	-	ENSG00000185829.18
ARL17B	chr17:46274183-46361787	TKS4_WT	TKS4_KO	5328.4	4624.02	0.867809	-0,20455062656953	-0.0615759	-13.2191	0.82975	0.0810527	0.9999	-	ENSG00000228696.10
ARL2BP	chr16:57245258-57253635	TKS4_WT	TKS4_KO	59473.5	59765	1.0049	0,00705385822238653	0.00212342	0.490133	0.98935	0.00465004	0.9999	+	ENSG00000102931.8
ARL3	chr10:102673730-102714397	TKS4_WT	TKS4_KO	28255.9	28068.9	0.993382	-0,00957958149616267	-0.00288374	-0.661806	0.9848	0.00665196	0.9999	-	ENSG00000138175.9
ARL4A	chr7:12686902-12690958	TKS4_WT	TKS4_KO	32031.9	27024.7	0.843681	-0,245229938110184	-0.0738216	-15.6319	0.6619	0.179208	0.9999	+	ENSG00000122644.13
ARL4C	chr2:234493040-234497081	TKS4_WT	TKS4_KO	13945.5	26022.6	1.86602	0,899960650784956	0.270915	86.6015	0.12995	0.886224	0.9999	-	ENSG00000188042.8
ARL4D	chr17:43398992-43401137	TKS4_WT	TKS4_KO	12717.2	13271.8	1.04361	0,0615825154710029	0.0185382	4.36099	0.91415	0.0389825	0.9999	+	ENSG00000175906.5
ARL5A	chr2:151798796-151828421	TKS4_WT	TKS4_KO	141401	111929	0.791572	-0,337208177725916	-0.10151	-20.8428	0.54725	0.261814	0.9999	-	ENSG00000162980.17
ARL5B	chr10:18659334-18681639	TKS4_WT	TKS4_KO	112605	103243	0.91686	-0,125226804156824	-0.037697	-8.31401	0.8128	0.0900163	0.9999	+	ENSG00000165997.5
ARL6	chr3:97762580-97972431	TKS4_WT	TKS4_KO	7288.19	4794.75	0.657884	-0,604094681602333	-0.181851	-34.2116	0.44645	0.350227	0.9999	+	ENSG00000113966.10
ARL6IP1	chr16:18791666-18801549	TKS4_WT	TKS4_KO	323176	285463	0.883305	-0,17901624007884	-0.0538893	-11.6695	0.7924	0.101056	0.9999	-	ENSG00000170540.15
ARL6IP5	chr3:69084936-69122595	TKS4_WT	TKS4_KO	28190.8	28407.4	1.00768	0,0110423358751654	0.00332407	0.768333	0.98365	0.0071594	0.9999	+	ENSG00000144746.7
ARL6IP6	chr2:152651592-152762396	TKS4_WT	TKS4_KO	35890.7	27043.1	0.753486	-0,408348206287127	-0.122925	-24.6514	0.85205	0.0695349	0.9999	+	ENSG00000177917.12
ARL8A	chr1:202118668-202144737	TKS4_WT	TKS4_KO	13603.3	15128.5	1.11212	0,153311206634832	0.0461513	11.2119	0.79825	0.0978611	0.9999	-	ENSG00000143862.8
ARL8B	chr3:5122291-5180911	TKS4_WT	TKS4_KO	56239.1	49255.6	0.875825	-0,191285385567395	-0.0575826	-12.4175	0.7057	0.15138	0.9999	+	ENSG00000134108.14
ARL9	chr4:56505208-56530486	TKS4_WT	TKS4_KO	87.1474	22.1427	0.254938	-1,97178021443607	-0.593565	-74.5062	1	0	1	+	ENSG00000196503.5
ARMC1	chr8:65602455-65634194	TKS4_WT	TKS4_KO	95160	75414.4	0.792501	-0,335514849660901	-0.101	-20.7499	0.5746	0.240634	0.9999	-	ENSG00000104442.10
ARMC10	chr7:102748998-103099773	TKS4_WT	TKS4_KO	60145.4	58444.1	0.971714	-0,041396942202173	-0.0124617	-2.82864	0.93855	0.0275426	0.9999	+	ENSG00000170632.14
ARMC12	chr6:35543357-35749079	TKS4_WT	TKS4_KO	734.845	947.545	1.28941	0,36671041908086	0.110391	28.9409	0.7868	0.104136	0.9999	+	ENSG00000157343.9
ARMC2	chr6:108848409-109094846	TKS4_WT	TKS4_KO	2433.02	2971.45	1.22129	0,28840818140543	0.0868195	22.1292	0.72865	0.137481	0.9999	+	ENSG00000118690.13
ARMC3	chr10:22928027-23095279	TKS4_WT	TKS4_KO	1248.31	1409.82	1.12937	0,175521486588137	0.0528372	12.9373	0.8036	0.0949601	0.9999	+	ENSG00000165309.14
ARMC5	chr16:31458272-31467167	TKS4_WT	TKS4_KO	12764.1	17351.6	1.3594	0,44297389580561	0.133348	35.9404	0.45475	0.342227	0.9999	+	ENSG00000140691.18
ARMC6	chr19:18990886-19058176	TKS4_WT	TKS4_KO	74497.3	62410.2	0.837751	-0,255405929009593	-0.0768848	-16.2249	0.85815	0.0664368	0.9999	+	ENSG00000105676.14
ARMC7	chr17:75109968-75154512	TKS4_WT	TKS4_KO	24737.7	27669.8	1.11853	0,161600226790538	0.0486465	11.8527	0.93935	0.0271726	0.9999	+	ENSG00000125449.7
ARMC8	chr3:138187247-138331785	TKS4_WT	TKS4_KO	58006.1	50787	0.875546	-0,191745014310881	-0.057721	-12.4454	0.74495	0.127873	0.9999	+	ENSG00000114098.18
ARMC9	chr2:231198627-231394991	TKS4_WT	TKS4_KO	17646.6	17871.5	1.01274	0,0182703818076967	0.00549993	1.27446	0.97575	0.0106614	0.9999	+	ENSG00000135931.19
ARMCX3	chrX:101623129-101631910	TKS4_WT	TKS4_KO	22540.1	22290.5	0.988926	-0,0160648662551451	-0.00483601	-1.10735	0.9789	0.00926167	0.9999	+	ENSG00000102401.20
ARMCX4	chrX:101418277-101539446	TKS4_WT	TKS4_KO	64.376	0	0.00155096	-9,33261843365355	-2.8094	-99.8449	1	0	1	+	ENSG00000196440.12
ARMCX5	chrX:102599205-102964523	TKS4_WT	TKS4_KO	44609.2	43131.9	0.966884	-0,0485858954530383	-0.0146258	-3.31164	0.9386	0.0275195	0.9999
ARMCX6	chrX:101615119-101618000	TKS4_WT	TKS4_KO	9706.4	7578.53	0.780779	-0,357014104061719	-0.107472	-21.9221	0.5629	0.249569	0.9999	-	ENSG00000198960.11
ARMH1	chr1:44674695-44725591	TKS4_WT	TKS4_KO	284.984	941.87	3.30418	1,72429404139764	0.519064	230.418	0.2521	0.598427	0.9999	+	ENSG00000198520.12
ARMH3	chr10:101844639-102056237	TKS4_WT	TKS4_KO	33646.7	36438.8	1.08298	0,115010105468952	0.0346215	8.29826	0.85785	0.0665886	0.9999	-	ENSG00000120029.13
ARMH4	chr14:57993535-58152305	TKS4_WT	TKS4_KO	3646.75	4932.08	1.35245	0,435574591037845	0.131121	35.2449	0.5767	0.23905	0.9999	-	ENSG00000139971.15
ARMT1	chr6:151452465-151470101	TKS4_WT	TKS4_KO	44333	32988.3	0.744103	-0,426425440588378	-0.128367	-25.5897	0.4542	0.342753	0.9999	+	ENSG00000146476.11
ARNT	chr1:150809712-150876737	TKS4_WT	TKS4_KO	33934.1	39833.6	1.17385	0,231249490411703	0.069613	17.3851	0.6975	0.156456	0.9999	-	ENSG00000143437.21
ARNTL	chr11:13276551-13387268	TKS4_WT	TKS4_KO	13475.7	12447.7	0.923715	-0,114480136386022	-0.034462	-7.62849	0.8455	0.0728864	0.9999	+	ENSG00000133794.20
ARNTL2	chr12:27332835-27506911	TKS4_WT	TKS4_KO	55695.5	47405.7	0.851159	-0,232499777297377	-0.0699894	-14.8841	0.6984	0.155896	0.9999	+	ENSG00000029153.15
ARPC1A	chr7:99325897-99366262	TKS4_WT	TKS4_KO	140625	154460	1.09838	0,135380088269806	0.0407535	9.83822	0.8116	0.090658	0.9999	+	ENSG00000241685.10
ARPC1B	chr7:99374253-99408597	TKS4_WT	TKS4_KO	118307	118089	0.998157	-0,00266085163863062	-0.000800996	-0.184266	0.9971	0.00126128	0.9999	+	ENSG00000130429.16
ARPC2	chr2:218217137-218254348	TKS4_WT	TKS4_KO	152678	139973	0.916786	-0,12534354119575	-0.0377322	-8.32143	0.8287	0.0816027	0.9999	+	ENSG00000163466.16
ARPC3	chr12:110434822-110450337	TKS4_WT	TKS4_KO	93476.9	71636.8	0.766359	-0,383908525997906	-0.115568	-23.3641	0.56875	0.245079	0.9999	-	ENSG00000111229.16
ARPC5	chr1:183620845-183635783	TKS4_WT	TKS4_KO	99664.6	83927.4	0.842099	-0,247939003406921	-0.0746371	-15.7901	0.64755	0.188727	0.9999	-	ENSG00000162704.16
ARPC5L	chr9:124862129-124877733	TKS4_WT	TKS4_KO	37700.6	34955.4	0.927184	-0,109071839393255	-0.0328339	-7.28156	0.8449	0.0731947	0.9999	+	ENSG00000136950.13
ARPP19	chr15:52547044-52569446	TKS4_WT	TKS4_KO	265245	258159	0.973285	-0,0390656463977989	-0.0117599	-2.67149	0.9483	0.0230542	0.9999	-	ENSG00000128989.11
ARRB1	chr11:75260121-75351662	TKS4_WT	TKS4_KO	49461.6	60418.9	1.22153	0,288690480046774	0.0869045	22.1531	0.60515	0.218137	0.9999	-	ENSG00000137486.17
ARRB2	chr17:4710618-4721500	TKS4_WT	TKS4_KO	34717.2	32515.2	0.936573	-0,0945360175150838	-0.0284582	-6.34266	0.85075	0.070198	0.9999	+	ENSG00000141480.18
ARRDC1	chr9:137605640-137618895	TKS4_WT	TKS4_KO	21420.3	36639	1.71048	0,774398644700948	0.233117	71.0477	0.21615	0.665245	0.9999	+	ENSG00000197070.14
ARRDC2	chr19:18001123-18014102	TKS4_WT	TKS4_KO	16422.6	22490.3	1.36947	0,453617985025185	0.136553	36.947	0.4601	0.337148	0.9999	+	ENSG00000105643.11
ARRDC3	chr5:91368630-91420715	TKS4_WT	TKS4_KO	45651.9	35881.7	0.785985	-0,347425801170354	-0.104586	-21.4015	0.58355	0.233922	0.9999	-	ENSG00000113369.9
ARRDC4	chr15:97960702-97973833	TKS4_WT	TKS4_KO	8344.91	6750.05	0.808885	-0,305994216703498	-0.0921134	-19.1115	0.60895	0.215418	0.9999	+	ENSG00000140450.9
ARSA	chr22:50622753-50628152	TKS4_WT	TKS4_KO	5970.53	10269	1.71994	0,78235467437401	0.235512	71.9936	0.25845	0.587623	0.9999	-	ENSG00000100299.18
ARSB	chr5:78777208-78986087	TKS4_WT	TKS4_KO	22496.5	19203.1	0.853605	-0,228360237633663	-0.0687433	-14.6395	0.6887	0.16197	0.9999	-	ENSG00000113273.17
ARSD	chrX:2903971-2929345	TKS4_WT	TKS4_KO	4056.54	11563.4	2.85051	1,5112209501752	0.454923	185.051	0.02175	1.66254	0.9999	-	ENSG00000006756.16
ARSG	chr17:68259169-68601367	TKS4_WT	TKS4_KO	13728.3	26404.9	1.92339	0,943647647502874	0.284066	92.3385	0.12915	0.888906	0.9999	+	ENSG00000141337.13
ARSI	chr5:150296342-150302905	TKS4_WT	TKS4_KO	362.714	198.752	0.548082	-0,867535054141258	-0.261154	-45.1918	0.4831	0.315963	0.9999	-	ENSG00000183876.9
ARSJ	chr4:113899928-113981526	TKS4_WT	TKS4_KO	6886.95	5052.18	0.733591	-0,446951554782471	-0.134546	-26.6409	0.4865	0.312917	0.9999	-	ENSG00000180801.14
ARSK	chr5:95555100-95605102	TKS4_WT	TKS4_KO	8460.31	6045.38	0.714561	-0,484870688139285	-0.145961	-28.5439	0.44855	0.348189	0.9999	+	ENSG00000164291.17
ART1	chr11:3645109-3665516	TKS4_WT	TKS4_KO	32.188	66.4282	2.06046	1,0429679208518	0.313965	106.046	1	0	1	+	ENSG00000129744.3
ART5	chr11:3638502-3642392	TKS4_WT	TKS4_KO	2946.49	2758.59	0.936231	-0,0950629852067032	-0.0286168	-6.37686	0.88625	0.0524438	0.9999	-	ENSG00000167311.14
ARTN	chr1:43933800-43937240	TKS4_WT	TKS4_KO	5798.72	5705.38	0.983904	-0,0234110915203865	-0.00704744	-1.60964	0.97	0.0132283	0.9999	+	ENSG00000117407.17
ARV1	chr1:230979081-231000733	TKS4_WT	TKS4_KO	2036.58	1732.84	0.850865	-0,2329976195199	-0.0701393	-14.9135	0.75915	0.119672	0.9999	+	ENSG00000173409.14
ARVCF	chr22:19875517-20016823	TKS4_WT	TKS4_KO	24522.9	32963.5	1.34419	0,426738329155604	0.128461	34.4191	0.715	0.145694	0.9999	-	ENSG00000099889.14
ARX	chrX:25003693-25015965	TKS4_WT	TKS4_KO	440.445	751.198	1.70538	0,770095869233914	0.231822	70.5383	0.44335	0.353253	0.9999	-	ENSG00000004848.8
ASAH1	chr8:18055991-18097651	TKS4_WT	TKS4_KO	58147.4	44388.4	0.763378	-0,389531208480754	-0.117261	-23.6622	0.51185	0.290857	0.9999	-	ENSG00000104763.20
ASAH2	chr10:50184860-50251564	TKS4_WT	TKS4_KO	2796.59	1834.77	0.656086	-0,608042494512119	-0.183039	-34.3914	0.3847	0.414878	0.9999	-	ENSG00000188611.17
ASAH2B	chr10:50739935-50759255	TKS4_WT	TKS4_KO	25744	22995.7	0.893245	-0,162871446715015	-0.0490292	-10.6755	0.78895	0.102951	0.9999	+	ENSG00000204147.11
ASAP1	chr8:130052103-130443848	TKS4_WT	TKS4_KO	82274	54139.8	0.658043	-0,60374611692987	-0.181746	-34.1957	0.2911	0.535958	0.9999	-	ENSG00000153317.15
ASAP2	chr2:9206811-9423569	TKS4_WT	TKS4_KO	58411.7	52432.6	0.897639	-0,155793004363422	-0.0468984	-10.2361	0.8258	0.0831251	0.9999	+	ENSG00000151693.11
ASAP3	chr1:23428562-23484631	TKS4_WT	TKS4_KO	19070	21750.7	1.14057	0,189756055740052	0.0571223	14.0571	0.77405	0.111231	0.9999	-	ENSG00000088280.20
ASB1	chr2:238426926-238456676	TKS4_WT	TKS4_KO	36224.7	42821.6	1.18211	0,241364346559237	0.0726579	18.211	0.68055	0.16714	0.9999	+	ENSG00000065802.12
ASB12	chrX:64224193-64230607	TKS4_WT	TKS4_KO	32.188	68.8147	2.13437	1,09381367340273	0.329271	113.437	1	0	1	-	ENSG00000198881.10
ASB13	chr10:5638866-5666595	TKS4_WT	TKS4_KO	13473.8	17616.1	1.30743	0,386735256146638	0.116419	30.7431	0.52025	0.283788	0.9999	-	ENSG00000196372.13
ASB14	chr3:57227728-57293048	TKS4_WT	TKS4_KO	96.564	116.68	1.2081	0,27274261575682	0.0821037	20.8102	1	0	1	-	ENSG00000239388.9
ASB16	chr17:44170703-44186717	TKS4_WT	TKS4_KO	409.027	291.435	0.712578	-0,488879654424393	-0.147167	-28.7422	0.8428	0.0742755	0.9999	+	ENSG00000161664.7
ASB18	chr2:236193451-236264345	TKS4_WT	TKS4_KO	64.376	160.965	2.49806	1,32080887632346	0.397603	149.806	1	0	1	-	ENSG00000182177.15
ASB2	chr14:93934159-93976739	TKS4_WT	TKS4_KO	32.188	79.5007	2.46533	1,30178303817292	0.391876	146.533	1	0	1	-	ENSG00000100628.12
ASB3	chr2:53669979-53859967	TKS4_WT	TKS4_KO	21519	17682.8	0.82173	-0,283262844395113	-0.0852706	-17.827	0.8119	0.0904975	0.9999
ASB4	chr7:95485438-95544738	TKS4_WT	TKS4_KO	32.188	0	0.00309713	-8,33485426933163	-2.50904	-99.6903	1	0	1	+	ENSG00000005981.13
ASB6	chr9:129608871-129642151	TKS4_WT	TKS4_KO	36677.7	35326.8	0.963168	-0,0541399504430321	-0.0162977	-3.68315	0.94355	0.0252351	0.9999	-	ENSG00000148331.12
ASB7	chr15:100566913-100651701	TKS4_WT	TKS4_KO	34832.8	29607.7	0.849995	-0,234473293546049	-0.0705835	-15.0005	0.76165	0.118245	0.9999	+	ENSG00000183475.13
ASB8	chr12:48147788-48157515	TKS4_WT	TKS4_KO	13209.5	12236.1	0.926311	-0,110431188015766	-0.0332431	-7.36888	0.8487	0.0712458	0.9999	-	ENSG00000177981.11
ASB9	chrX:15243986-15270476	TKS4_WT	TKS4_KO	1748.43	4346.66	2.48595	1,31379789256175	0.395493	148.595	0.0807	1.09313	0.9999	-	ENSG00000102048.16
ASCC1	chr10:72096031-72235860	TKS4_WT	TKS4_KO	38304.9	31440.4	0.820794	-0,284908560209122	-0.085766	-17.9206	0.76315	0.11739	0.9999	-	ENSG00000138303.18
ASCC2	chr22:29788607-29838282	TKS4_WT	TKS4_KO	41705.6	37611.7	0.901838	-0,149059221561923	-0.0448713	-9.81616	0.76245	0.117789	0.9999	-	ENSG00000100325.15
ASCC3	chr6:100508193-101248498	TKS4_WT	TKS4_KO	181069	164425	0.908079	-0,139109819247389	-0.0418762	-9.19207	0.81715	0.0876982	0.9999	-	ENSG00000112249.14
ASCL1	chr12:102836888-102960513	TKS4_WT	TKS4_KO	96.564	23.336	0.242448	-2,04425234031508	-0.615381	-75.7552	1	0	1	+	ENSG00000139352.4
ASCL5	chr1:201113942-201127184	TKS4_WT	TKS4_KO	349.36	173.8	0.497625	-1,00686939819457	-0.303098	-50.2375	0.47945	0.319257	0.9999	-	ENSG00000232237.5
ASDURF	chr2:189661398-189670831	TKS4_WT	TKS4_KO	80543.9	63113.6	0.783593	-0,351823918674176	-0.10591	-21.6407	0.54435	0.264122	0.9999
ASF1A	chr6:118813448-118935159	TKS4_WT	TKS4_KO	35675.6	27922.9	0.78269	-0,35348778678956	-0.10641	-21.731	0.6733	0.171791	0.9999	+	ENSG00000111875.8
ASF1B	chr19:14119511-14136589	TKS4_WT	TKS4_KO	86904	69303.4	0.797471	-0,326496028840458	-0.0982851	-20.2529	0.5508	0.259006	0.9999	-	ENSG00000105011.9
ASGR1	chr17:7173430-7179426	TKS4_WT	TKS4_KO	188.42	312.09	1.656	0,727706739506335	0.219062	65.6005	0.4737	0.324497	0.9999	-	ENSG00000141505.12
ASH1L	chr1:155335262-155563944	TKS4_WT	TKS4_KO	161655	145166	0.897999	-0,155214436814765	-0.0467242	-10.2001	0.79	0.102373	0.9999
ASH2L	chr8:38104964-38140080	TKS4_WT	TKS4_KO	40184	38412.2	0.955908	-0,0650564201333007	-0.0195839	-4.40921	0.9037	0.0439757	0.9999	+	ENSG00000129691.16
ASIC1	chr12:50057595-50083622	TKS4_WT	TKS4_KO	23376.8	27498.1	1.1763	0,234253557173481	0.0705173	17.6298	0.69795	0.156176	0.9999	+	ENSG00000110881.12
ASIC3	chr7:151048291-151052756	TKS4_WT	TKS4_KO	639.052	1637.18	2.56164	1,35707009413717	0.408519	156.164	0.2534	0.596193	0.9999	+	ENSG00000213199.8
ASIC4	chr2:219434214-219538772	TKS4_WT	TKS4_KO	404.319	1443.91	3.57058	1,83615804998412	0.552739	257.058	0.3814	0.418619	0.9999	+	ENSG00000072182.14
ASIP	chr20:34186492-34311976	TKS4_WT	TKS4_KO	59.6677	135.243	2.26448	1,17918234196863	0.354969	126.448	0.601	0.221126	0.9999	+	ENSG00000101440.10
ASL	chr7:66075818-66093576	TKS4_WT	TKS4_KO	35910.8	41745.2	1.16247	0,217191966946119	0.0653813	16.2469	0.68555	0.163961	0.9999	+	ENSG00000126522.17
ASMTL	chrX:1400530-1453794	TKS4_WT	TKS4_KO	21428.2	30490.1	1.42289	0,508828214416735	0.153173	42.2894	0.4032	0.394479	0.9999	-	ENSG00000169093.16_PAR_Y
ASPG	chr14:104085657-104115582	TKS4_WT	TKS4_KO	64.376	68.8147	1.06884	0,0960495090808118	0.0289138	6.88427	1	0	1	+	ENSG00000166183.16
ASPH	chr8:60964832-61714640	TKS4_WT	TKS4_KO	415307	444188	1.06954	0,0969922069756	0.0291976	6.95413	0.897	0.0472076	0.9999	-	ENSG00000198363.18
ASPHD1	chr16:29900391-29926226	TKS4_WT	TKS4_KO	3918.38	7380.35	1.8835	0,913414649321457	0.274965	88.3498	0.46835	0.329429	0.9999	+	ENSG00000174939.11
ASPHD2	chr22:26429259-26483863	TKS4_WT	TKS4_KO	8894.42	7721.23	0.8681	-0,204067378094223	-0.0614304	-13.19	0.8738	0.058588	0.9999	+	ENSG00000128203.7
ASPM	chr1:197084126-197146669	TKS4_WT	TKS4_KO	226217	152009	0.671961	-0,573550295400837	-0.172656	-32.8039	0.34085	0.467437	0.9999	-	ENSG00000066279.19
ASPN	chr9:92297357-92670259	TKS4_WT	TKS4_KO	32.188	0	0.00309713	-8,33485426933163	-2.50904	-99.6903	1	0	1	-	ENSG00000106819.13
ASPRV1	chr2:69915108-70087375	TKS4_WT	TKS4_KO	6688.26	6147.19	0.919103	-0,121701956170098	-0.0366359	-8.08973	0.8885	0.0513426	0.9999
ASPSCR1	chr17:81977549-82017669	TKS4_WT	TKS4_KO	19732.8	21539.7	1.09157	0,126401860340847	0.0380508	9.15679	0.82475	0.0836777	0.9999	+	ENSG00000169696.16
ASRGL1	chr11:62337429-62401401	TKS4_WT	TKS4_KO	22570	21226.2	0.940461	-0,0885598965875219	-0.0266592	-5.95389	0.8732	0.0588863	0.9999	+	ENSG00000162174.12
ASS1	chr9:130444706-130502592	TKS4_WT	TKS4_KO	27479.9	40042.7	1.45716	0,543160854255611	0.163508	45.7162	0.3155	0.501001	0.9999	+	ENSG00000130707.18
ASTE1	chr3:130748959-131026825	TKS4_WT	TKS4_KO	6018.73	5262.06	0.874283	-0,193827953420514	-0.058348	-12.5717	0.8626	0.0641905	0.9999	-	ENSG00000034533.12
ASTL	chr2:96122816-96143059	TKS4_WT	TKS4_KO	3180.36	2989.79	0.940081	-0,0891430344427478	-0.0268347	-5.9919	0.9181	0.03711	0.9999	-	ENSG00000188886.4
ASTN2	chr9:116423111-117415057	TKS4_WT	TKS4_KO	10037.5	8614.54	0.858237	-0,220551947153404	-0.0663928	-14.1763	0.8749	0.0580416	0.9999	-	ENSG00000148219.18
ASXL1	chr20:32358061-32439319	TKS4_WT	TKS4_KO	84538.2	91560	1.08306	0,11511393739937	0.0346527	8.30606	0.8497	0.0707344	0.9999	+	ENSG00000171456.21
ASXL2	chr2:25733752-25878487	TKS4_WT	TKS4_KO	98344.1	78266.4	0.795843	-0,329445039428034	-0.0991728	-20.4157	0.542	0.266001	0.9999	-	ENSG00000143970.18
ATAD1	chr10:87751511-87845612	TKS4_WT	TKS4_KO	89092.8	80509.1	0.903654	-0,146156811695901	-0.0439976	-9.63455	0.7893	0.102758	0.9999	-	ENSG00000138138.14
ATAD2	chr8:123319849-123396447	TKS4_WT	TKS4_KO	321927	249851	0.776111	-0,365665459059119	-0.110076	-22.3889	0.57305	0.241807	0.9999	-	ENSG00000156802.13
ATAD2B	chr2:23385178-23927123	TKS4_WT	TKS4_KO	37449.6	31570.1	0.843003	-0,246390761388007	-0.074171	-15.6997	0.735	0.133713	0.9999	-	ENSG00000119778.15
ATAD3A	chr1:1512142-1534687	TKS4_WT	TKS4_KO	88395.2	67630.3	0.76509	-0,386297776597335	-0.116287	-23.491	0.4575	0.339609	0.9999	+	ENSG00000197785.14
ATAD3B	chr1:1471731-1509466	TKS4_WT	TKS4_KO	83962.7	77641	0.924708	-0,112929720628639	-0.0339952	-7.52917	0.8519	0.0696114	0.9999	+	ENSG00000160072.20
ATAD3C	chr1:1449688-1470163	TKS4_WT	TKS4_KO	1442.21	1061.89	0.736312	-0,441611099285966	-0.132938	-26.3688	0.6042	0.218819	0.9999	+	ENSG00000215915.10
ATAD5	chr17:30830829-30895869	TKS4_WT	TKS4_KO	41117.8	27381.5	0.665929	-0,58655983352238	-0.176572	-33.4071	0.29935	0.523821	0.9999
ATAT1	chr6:30626873-30646821	TKS4_WT	TKS4_KO	8912.4	8647.24	0.970249	-0,0435737566087463	-0.013117	-2.97515	0.9439	0.025074	0.9999	+	ENSG00000137343.18
ATE1	chr10:121740420-121951965	TKS4_WT	TKS4_KO	81081.6	71397.7	0.880566	-0,183496716615906	-0.055238	-11.9434	0.7321	0.13543	0.9999	-	ENSG00000107669.19
ATF1	chr12:50763681-50821162	TKS4_WT	TKS4_KO	33817.2	34392.9	1.01702	0,0243534849569211	0.00733113	1.70238	0.96065	0.0174348	0.9999	+	ENSG00000123268.9
ATF2	chr2:175072249-175168203	TKS4_WT	TKS4_KO	45404.9	40997.9	0.90294	-0,147297643240238	-0.044341	-9.70598	0.782	0.106793	0.9999	-	ENSG00000115966.18
ATF3	chr1:212565406-212620777	TKS4_WT	TKS4_KO	40704.4	100904	2.47894	1,30972459362061	0.394266	147.894	0.1025	0.989276	0.9999	+	ENSG00000162772.17
ATF6	chr1:161766319-161964070	TKS4_WT	TKS4_KO	86113.6	81406.2	0.945335	-0,0811023287217418	-0.0244142	-5.46649	0.884	0.0535477	0.9999	+	ENSG00000118217.7
ATF6B	chr6:32115263-32128246	TKS4_WT	TKS4_KO	26812.6	30536.3	1.13888	0,187613485893203	0.0564773	13.8878	0.7392	0.131238	0.9999	-	ENSG00000213676.13
ATF7IP	chr12:14365639-14502935	TKS4_WT	TKS4_KO	86579.8	83886.1	0.968888	-0,0455986397687062	-0.0137266	-3.11123	0.93125	0.0309337	0.9999	+	ENSG00000171681.13
ATF7IP2	chr16:10386060-10483643	TKS4_WT	TKS4_KO	9592.37	6476.21	0.675145	-0,566730303438229	-0.170603	-32.4855	0.35265	0.452656	0.9999	+	ENSG00000166669.14
ATG10	chr5:81972020-82258502	TKS4_WT	TKS4_KO	10526.7	9501.37	0.902598	-0,147844304528158	-0.0445056	-9.74019	0.83265	0.0795375	0.9999	+	ENSG00000152348.16
ATG101	chr12:52069922-52077495	TKS4_WT	TKS4_KO	40193.8	36387.4	0.905299	-0,143533634033476	-0.0432079	-9.47009	0.77495	0.110726	0.9999	+	ENSG00000123395.15
ATG12	chr5:115828199-115841565	TKS4_WT	TKS4_KO	252003	261019	1.03578	0,0507138984109157	0.0152664	3.57773	0.93545	0.0289794	0.9999	-	ENSG00000145782.13
ATG13	chr11:46602860-46676018	TKS4_WT	TKS4_KO	54178	59003.1	1.08906	0,123083400415748	0.0370518	8.906	0.80045	0.0966658	0.9999	+	ENSG00000175224.17
ATG16L1	chr2:233251646-233295674	TKS4_WT	TKS4_KO	49331.9	54080.4	1.09626	0,132584712349428	0.039912	9.6256	0.85975	0.0656278	0.9999	+	ENSG00000085978.22
ATG16L2	chr11:72814406-73142682	TKS4_WT	TKS4_KO	6736.02	11413.6	1.6944	0,760776804030916	0.229017	69.4403	0.45595	0.341083	0.9999	+	ENSG00000168010.11
ATG2A	chr11:64894545-64917241	TKS4_WT	TKS4_KO	25180.8	26038	1.03404	0,0482943310123395	0.014538	3.40417	0.936	0.0287242	0.9999	-	ENSG00000110046.13
ATG2B	chr14:96279194-96363341	TKS4_WT	TKS4_KO	24644.4	27877.9	1.13121	0,177861353121941	0.0535416	13.1206	0.7263	0.138884	0.9999	-	ENSG00000066739.12
ATG3	chr3:112532509-112585579	TKS4_WT	TKS4_KO	73102.8	40783.7	0.557896	-0,841932435535789	-0.253447	-44.2104	0.2787	0.554863	0.9999	-	ENSG00000144848.11
ATG4A	chrX:108091777-108154671	TKS4_WT	TKS4_KO	12036.6	10750.9	0.893185	-0,162969057075377	-0.0490586	-10.6815	0.7856	0.104799	0.9999	+	ENSG00000101844.18
ATG4B	chr2:241637658-241673857	TKS4_WT	TKS4_KO	40001.3	50895.9	1.27236	0,347501783547263	0.104608	27.2355	0.5895	0.229516	0.9999	+	ENSG00000168397.17
ATG4C	chr1:62783764-62865516	TKS4_WT	TKS4_KO	16094.8	10458.3	0.649796	-0,621941458389894	-0.187223	-35.0204	0.30455	0.516341	0.9999	+	ENSG00000125703.15
ATG4D	chr19:10543896-10566031	TKS4_WT	TKS4_KO	30900.7	26119.5	0.845273	-0,242511385597956	-0.0730032	-15.4727	0.75255	0.123465	0.9999	+	ENSG00000130734.10
ATG5	chr6:106184475-106325789	TKS4_WT	TKS4_KO	72146.8	56998.3	0.790033	-0,340015984481564	-0.102355	-20.9967	0.5457	0.263046	0.9999	-	ENSG00000057663.16
ATG7	chr3:11272347-11720715	TKS4_WT	TKS4_KO	31161.1	33508.4	1.07533	0,104776314258158	0.0315408	7.53277	0.9162	0.0380097	0.9999	+	ENSG00000197548.13
ATG9A	chr2:219219379-219229636	TKS4_WT	TKS4_KO	60249.8	69676.1	1.15645	0,209707097566441	0.0631281	15.6453	0.7074	0.150335	0.9999	-	ENSG00000198925.12
ATG9B	chr7:150991016-151028267	TKS4_WT	TKS4_KO	537.779	862.902	1.60445	0,682082238858298	0.205327	60.4454	0.55275	0.257471	0.9999	-	ENSG00000181652.20
ATIC	chr2:215311973-215359745	TKS4_WT	TKS4_KO	92362.7	101881	1.10305	0,14150262691523	0.0425965	10.3053	0.80535	0.0940153	0.9999	+	ENSG00000138363.15
ATL1	chr14:50418474-50633068	TKS4_WT	TKS4_KO	1784.55	2796.84	1.56722	0,648208140293083	0.19513	56.722	0.579	0.237321	0.9999	+	ENSG00000198513.14
ATL2	chr2:38293953-38378584	TKS4_WT	TKS4_KO	138542	121385	0.87616	-0,190733105367486	-0.0574164	-12.384	0.7605	0.118901	0.9999	-	ENSG00000119787.14
ATL3	chr11:63574461-63671974	TKS4_WT	TKS4_KO	118725	101135	0.851843	-0,231341184719141	-0.0696406	-14.8157	0.6887	0.16197	0.9999	-	ENSG00000184743.13
ATM	chr11:108155279-108469832	TKS4_WT	TKS4_KO	108069	104806	0.969806	-0,0442313867887769	-0.013315	-3.01936	0.9618	0.0169152	0.9999	+	ENSG00000149311.20
ATMIN	chr16:81007213-81047350	TKS4_WT	TKS4_KO	147611	117566	0.796458	-0,328329091384259	-0.0988369	-20.3542	0.6929	0.159329	0.9999	+	ENSG00000166454.10
ATN1	chr12:6924458-6942321	TKS4_WT	TKS4_KO	74085.7	72912.8	0.984168	-0,0230229644795754	-0.0069306	-1.58316	0.9705	0.0130045	0.9999	+	ENSG00000111676.15
ATOH1	chr4:93828752-93830964	TKS4_WT	TKS4_KO	87.1474	88.5709	1.01632	0,0233485796048412	0.00702862	1.63157	0.69835	0.155927	0.9999	+	ENSG00000172238.6
ATOH7	chr10:68230594-68232113	TKS4_WT	TKS4_KO	311.693	44.2855	0.142356	-2,8124281844216	-0.846625	-85.7644	0.18525	0.732242	0.9999	-	ENSG00000179774.9
ATOH8	chr2:85753785-85791383	TKS4_WT	TKS4_KO	753.679	805.672	1.06898	0,0962300711181139	0.0289681	6.89765	0.9203	0.0360706	0.9999	+	ENSG00000168874.13
ATOX1	chr5:151742821-151758631	TKS4_WT	TKS4_KO	12024	13146.5	1.09335	0,128760822299573	0.0387609	9.33542	0.82965	0.0811051	0.9999	-	ENSG00000177556.12
ATP10D	chr4:47485260-47593486	TKS4_WT	TKS4_KO	14679.2	5353.18	0.364682	-1,45528815416964	-0.438085	-63.5318	0.02905	1.53685	0.9999	+	ENSG00000145246.14
ATP11A	chr13:112690033-112887168	TKS4_WT	TKS4_KO	128521	148289	1.15381	0,206407322430504	0.0621348	15.3811	0.77225	0.112242	0.9999	+	ENSG00000068650.19
ATP11B	chr3:182793503-182923010	TKS4_WT	TKS4_KO	93574.9	88544	0.946237	-0,079726964711838	-0.0240002	-5.37633	0.8817	0.0546792	0.9999	+	ENSG00000058063.16
ATP11C	chrX:139726345-139933083	TKS4_WT	TKS4_KO	56230.4	40974.2	0.728685	-0,456633572631688	-0.13746	-27.1315	0.45145	0.34539	0.9999	-	ENSG00000101974.15
ATP12A	chr13:24680407-24712472	TKS4_WT	TKS4_KO	339.943	296.208	0.871384	-0,198619615264043	-0.0597905	-12.8616	0.81665	0.087964	0.9999	+	ENSG00000075673.12
ATP13A1	chr19:19645197-19663676	TKS4_WT	TKS4_KO	43114	51625.6	1.19742	0,259929674077304	0.0782466	19.742	0.6539	0.184489	0.9999	-	ENSG00000105726.17
ATP13A2	chr1:16985957-17011972	TKS4_WT	TKS4_KO	35578.5	41387.8	1.16328	0,218199306448999	0.0656845	16.3281	0.73425	0.134156	0.9999	-	ENSG00000159363.19
ATP13A3	chr3:194402673-194487006	TKS4_WT	TKS4_KO	323731	172446	0.532683	-0,908650466624082	-0.273531	-46.7317	0.17655	0.753132	0.9999	-	ENSG00000133657.17
ATP13A4	chr3:193398966-193593114	TKS4_WT	TKS4_KO	96.564	267.382	2.76713	1,46839120921642	0.44203	176.713	1	0	1	-	ENSG00000127249.15
ATP1A1	chr1:116372985-116418622	TKS4_WT	TKS4_KO	314887	463657	1.47246	0,558223591430431	0.168042	47.2455	0.44035	0.356202	0.9999	+	ENSG00000163399.16
ATP1A3	chr19:41966581-41994230	TKS4_WT	TKS4_KO	33835.6	32648.6	0.964919	-0,0515206876848002	-0.0155093	-3.50813	0.9293	0.0318441	0.9999	-	ENSG00000105409.19
ATP1B1	chr1:169106689-169367797	TKS4_WT	TKS4_KO	100544	57225.9	0.569163	-0,813085752150077	-0.244763	-43.0837	0.1883	0.72515	0.9999	+	ENSG00000143153.14
ATP1B2	chr17:7646626-7657770	TKS4_WT	TKS4_KO	32.188	22.1427	0.688884	-0,537666154796718	-0.161854	-31.1116	1	0	1	+	ENSG00000129244.9
ATP1B3	chr3:141876642-141926549	TKS4_WT	TKS4_KO	110609	117771	1.06475	0,0905154743817106	0.0272479	6.47505	0.8598	0.0656026	0.9999	+	ENSG00000069849.11
ATP23	chr12:57941566-57959148	TKS4_WT	TKS4_KO	7055.77	4572.72	0.648087	-0,625739848954394	-0.188366	-35.1913	0.37265	0.428699	0.9999	+	ENSG00000166896.9
ATP2A1	chr16:28878487-28925238	TKS4_WT	TKS4_KO	2871.84	3965.74	1.38089	0,465600864892032	0.14016	38.0892	0.77415	0.111175	0.9999	+	ENSG00000196296.14
ATP2A2	chr12:110281246-110351093	TKS4_WT	TKS4_KO	383133	405595	1.05863	0,0821945533965484	0.024743	5.86271	0.89995	0.0457816	0.9999	+	ENSG00000174437.18
ATP2A3	chr17:3923868-3964464	TKS4_WT	TKS4_KO	19852.3	25520.1	1.2855	0,362326206979626	0.109071	28.5497	0.5754	0.24003	0.9999	-	ENSG00000074370.18
ATP2B1	chr12:89588048-89711952	TKS4_WT	TKS4_KO	115877	101976	0.880037	-0,184364415206712	-0.0554992	-11.9963	0.73095	0.136112	0.9999	-	ENSG00000070961.16
ATP2B2	chr3:10324022-10707962	TKS4_WT	TKS4_KO	91.8557	67.6214	0.736457	-0,441327206556373	-0.132853	-26.3543	0.48135	0.317539	0.9999	-	ENSG00000157087.20
ATP2B4	chr1:203626831-203744733	TKS4_WT	TKS4_KO	116668	140745	1.20637	0,270674550402058	0.0814812	20.6372	0.60855	0.215704	0.9999	+	ENSG00000058668.15
ATP2C1	chr3:130748959-131026825	TKS4_WT	TKS4_KO	121896	107804	0.884393	-0,177239920808903	-0.0533545	-11.5607	0.79745	0.0982965	0.9999	+	ENSG00000017260.20
ATP2C2	chr16:84368522-84467361	TKS4_WT	TKS4_KO	6634.75	10426.7	1.57152	0,652160705814757	0.19632	57.152	0.4042	0.393404	0.9999	+	ENSG00000064270.13
ATP5F1A	chr18:46080247-46104227	TKS4_WT	TKS4_KO	722271	775621	1.07386	0,102811605617429	0.0309494	7.38642	0.89595	0.0477162	0.9999	-	ENSG00000152234.16
ATP5F1B	chr12:56638174-56645984	TKS4_WT	TKS4_KO	866231	962198	1.11079	0,151581980688149	0.0456307	11.0787	0.8236	0.0842837	0.9999	-	ENSG00000110955.9
ATP5F1C	chr10:7788158-7818363	TKS4_WT	TKS4_KO	210189	203735	0.969294	-0,0449933029875635	-0.0135443	-3.07057	0.9457	0.0242466	0.9999	+	ENSG00000165629.20
ATP5F1D	chr19:1241750-1244825	TKS4_WT	TKS4_KO	79050.6	110267	1.39489	0,480152260448632	0.14454	39.4891	0.39665	0.401593	0.9999	+	ENSG00000099624.8
ATP5F1E	chr20:59016025-59042846	TKS4_WT	TKS4_KO	269170	219947	0.817131	-0,291361581690464	-0.0877086	-18.2869	0.688	0.162412	0.9999
ATP5IF1	chr1:28236123-28238100	TKS4_WT	TKS4_KO	12993.3	11601.7	0.892899	-0,163430337630225	-0.0491974	-10.7101	0.7875	0.103749	0.9999	+	ENSG00000130770.18
ATP5MC1	chr17:48874707-48929056	TKS4_WT	TKS4_KO	80388.9	92604.2	1.15195	0,204081081077838	0.0614345	15.1952	0.8509	0.0701215	0.9999	+	ENSG00000159199.14
ATP5MC2	chr12:53665159-53677546	TKS4_WT	TKS4_KO	95977.8	91866.3	0.957162	-0,0631649527703008	-0.0190145	-4.2838	0.90305	0.0442882	0.9999	-	ENSG00000135390.21
ATP5MC3	chr2:175176257-175181710	TKS4_WT	TKS4_KO	105074	120598	1.14774	0,19880007872661	0.0598448	14.7743	0.71845	0.143603	0.9999	-	ENSG00000154518.10
ATP5ME	chr4:672435-690748	TKS4_WT	TKS4_KO	48509.2	31000.5	0.639065	-0,645965222913152	-0.194455	-36.0935	0.5469	0.262092	0.9999	-	ENSG00000169020.10
ATP5MF	chr7:99408640-99466167	TKS4_WT	TKS4_KO	169114	117949	0.697453	-0,51983254015176	-0.156485	-30.2547	0.70375	0.152582	0.9999
ATP5MG	chr11:118359599-118418815	TKS4_WT	TKS4_KO	85166.7	63312	0.743389	-0,427809894821154	-0.128784	-25.6611	0.80265	0.0954738	0.9999	+	ENSG00000167283.9
ATP5MGL	chr22:42617839-42649392	TKS4_WT	TKS4_KO	128.752	327.734	2.54427	1,34725055514985	0.405563	154.427	0.63295	0.198631	0.9999	-	ENSG00000249222.1
ATP5MJ	chr14:103912287-103921529	TKS4_WT	TKS4_KO	84796.3	69076.1	0.814612	-0,295814297074713	-0.089049	-18.5388	0.624	0.204815	0.9999	-	ENSG00000156411.10
ATP5MK	chr10:103367975-103396505	TKS4_WT	TKS4_KO	198368	168136	0.847596	-0,238550526913798	-0.0718109	-15.2404	0.76555	0.116026	0.9999
ATP5PB	chr1:111449463-111478512	TKS4_WT	TKS4_KO	299244	282225	0.943127	-0,0844765014626348	-0.02543	-5.68733	0.9078	0.0420098	0.9999
ATP5PD	chr17:75032570-75065886	TKS4_WT	TKS4_KO	128908	108558	0.842136	-0,247875543129631	-0.074618	-15.7864	0.71105	0.1481	0.9999	-	ENSG00000167863.12
ATP5PF	chr21:25724499-25772460	TKS4_WT	TKS4_KO	35608.9	27335.8	0.767668	-0,381445046138316	-0.114826	-23.2332	0.65775	0.181939	0.9999	-	ENSG00000154723.13
ATP5PO	chr21:33903452-33915804	TKS4_WT	TKS4_KO	98776.6	92233.7	0.933761	-0,0988752333715696	-0.0297644	-6.62393	0.8507	0.0702236	0.9999	-	ENSG00000241837.7
ATP6AP1	chrX:154428668-154436516	TKS4_WT	TKS4_KO	66609.4	71537.4	1.07398	0,102971749320354	0.0309976	7.39834	0.84005	0.0756949	0.9999	+	ENSG00000071553.18
ATP6AP2	chrX:40580969-40606848	TKS4_WT	TKS4_KO	64572.3	62227.2	0.963683	-0,0533699995367604	-0.016066	-3.63174	0.9195	0.0364483	0.9999	+	ENSG00000182220.15
ATP6V0A2	chr12:123712352-123761755	TKS4_WT	TKS4_KO	42274.9	36266.1	0.857864	-0,221179168090839	-0.0665816	-14.2136	0.66895	0.174606	0.9999	+	ENSG00000185344.15
ATP6V0A4	chr7:138706293-138806759	TKS4_WT	TKS4_KO	403.549	135.243	0.335299	-1,57648104491643	-0.474568	-66.4701	0.22465	0.648494	0.9999	-	ENSG00000105929.16
ATP6V0B	chr1:43974959-43978295	TKS4_WT	TKS4_KO	87311.1	84378.4	0.966411	-0,049291289069278	-0.0148382	-3.3589	0.9331	0.0300718	0.9999	+	ENSG00000117410.14
ATP6V0C	chr16:2513725-2520218	TKS4_WT	TKS4_KO	52715.1	47363.7	0.898485	-0,154434178147144	-0.0464893	-10.1515	0.7978	0.098106	0.9999	+	ENSG00000185883.12
ATP6V0D1	chr16:67438018-67481157	TKS4_WT	TKS4_KO	27946.6	27325.3	0.977768	-0,0324353221332439	-0.009764	-2.22316	0.95155	0.0215684	0.9999	-	ENSG00000159720.13
ATP6V0E1	chr5:172983770-173035445	TKS4_WT	TKS4_KO	73979.9	62199.1	0.840757	-0,250239275788587	-0.0753295	-15.9243	0.68185	0.166311	0.9999	+	ENSG00000113732.9
ATP6V0E2	chr7:149867693-149880713	TKS4_WT	TKS4_KO	27593.3	27061.4	0.980724	-0,0280814243484709	-0.00845335	-1.92763	0.958	0.0186345	0.9999	+	ENSG00000171130.19
ATP6V1A	chr3:113747034-113812056	TKS4_WT	TKS4_KO	142068	149830	1.05464	0,0767448340905117	0.0231025	5.46358	0.89245	0.0494161	0.9999	+	ENSG00000114573.10
ATP6V1B1	chr2:70935899-70965431	TKS4_WT	TKS4_KO	91.8557	362.636	3.94468	1,97990902379022	0.596012	294.468	0.2988	0.524619	0.9999	+	ENSG00000116039.13
ATP6V1B2	chr8:20197374-20226852	TKS4_WT	TKS4_KO	88114.6	85241.3	0.967391	-0,0478284331079146	-0.0143978	-3.26086	0.93465	0.029351	0.9999	+	ENSG00000147416.11
ATP6V1C1	chr8:103021082-103073051	TKS4_WT	TKS4_KO	155847	127983	0.821209	-0,284177992750149	-0.0855461	-17.8791	0.6032	0.219539	0.9999	+	ENSG00000155097.12
ATP6V1C2	chr2:10720972-10837712	TKS4_WT	TKS4_KO	1731.9	4676.07	2.69987	1,43288844927002	0.431342	169.987	0.3376	0.471598	0.9999	+	ENSG00000143882.12
ATP6V1D	chr14:67337871-67359804	TKS4_WT	TKS4_KO	39299.2	36292.4	0.92349	-0,114832175460924	-0.0345679	-7.65103	0.8478	0.0717066	0.9999	-	ENSG00000100554.12
ATP6V1E1	chr22:17562469-17628822	TKS4_WT	TKS4_KO	100555	92555.6	0.920448	-0,119592509120622	-0.0360009	-7.95524	0.83035	0.0807388	0.9999	-	ENSG00000131100.13
ATP6V1E2	chr2:46511846-46617057	TKS4_WT	TKS4_KO	11044.1	6969.37	0.631052	-0,664168064859805	-0.199935	-36.8948	0.53005	0.275683	0.9999	-	ENSG00000250565.7
ATP6V1F	chr7:128862855-128865847	TKS4_WT	TKS4_KO	65599.8	60245.8	0.918384	-0,122830552707606	-0.0369757	-8.1616	0.82835	0.0817861	0.9999	+	ENSG00000128524.5
ATP6V1FNB	chr7:128866329-128910719	TKS4_WT	TKS4_KO	523.654	806.389	1.53982	0,622765499101068	0.187471	53.9824	0.60325	0.219503	0.9999	+	ENSG00000272899.4
ATP6V1G1	chr9:114587768-114598879	TKS4_WT	TKS4_KO	64544	45590.3	0.706345	-0,501555157130801	-0.150983	-29.3655	0.43365	0.362861	0.9999	+	ENSG00000136888.8
ATP6V1G2	chr6:31528961-31546848	TKS4_WT	TKS4_KO	205303	198173	0.965271	-0,0509942672561307	-0.0153508	-3.47291	0.92955	0.0317272	0.9999
ATP6V1H	chr8:53715542-53843245	TKS4_WT	TKS4_KO	30347.6	31452.4	1.0364	0,0515875129398415	0.0155294	3.64047	0.91975	0.0363302	0.9999	-	ENSG00000047249.18
ATP7A	chrX:77910692-78050395	TKS4_WT	TKS4_KO	21371.3	23313.3	1.09087	0,125478001513234	0.0377726	9.08691	0.8113	0.0908185	0.9999	+	ENSG00000165240.22
ATP7B	chr13:51932668-52012130	TKS4_WT	TKS4_KO	11333.5	15675.9	1.38314	0,467951287044627	0.140867	38.3144	0.47615	0.322256	0.9999	-	ENSG00000123191.16
ATP8A1	chr4:42408372-42657105	TKS4_WT	TKS4_KO	3089.36	4408.81	1.42708	0,513067332585676	0.154449	42.7081	0.3672	0.435097	0.9999	-	ENSG00000124406.16
ATP8A2	chr13:25371973-26025851	TKS4_WT	TKS4_KO	225.316	110.952	0.492654	-1,02135454600921	-0.307458	-50.7346	1	0	1	+	ENSG00000132932.19
ATP8B1	chr18:57630330-57803822	TKS4_WT	TKS4_KO	22688.7	25396.1	1.11933	0,162632337021296	0.0489572	11.9328	0.7987	0.0976163	0.9999	-	ENSG00000081923.15
ATP8B2	chr1:154325524-154351304	TKS4_WT	TKS4_KO	52769.4	62164.1	1.17803	0,236379666032638	0.0711574	17.8033	0.661	0.179799	0.9999	+	ENSG00000143515.20
ATP8B3	chr19:1782067-1812276	TKS4_WT	TKS4_KO	8439.76	11879.5	1.40756	0,493195286844065	0.148467	40.7559	0.40965	0.387587	0.9999	-	ENSG00000130270.16
ATP8B4	chr15:49858237-50181851	TKS4_WT	TKS4_KO	545.655	213.55	0.391476	-1,35300412568153	-0.407295	-60.8524	0.01195	1.92263	0.9999	-	ENSG00000104043.15
ATP9A	chr20:51596513-51768390	TKS4_WT	TKS4_KO	35192.6	50928.4	1.44713	0,533197023526892	0.160508	44.7133	0.3176	0.49812	0.9999	-	ENSG00000054793.14
ATPAF1	chr1:46632736-46668443	TKS4_WT	TKS4_KO	39502.9	35104.1	0.888646	-0,170318570526064	-0.051271	-11.1354	0.74315	0.128924	0.9999
ATPAF2	chr17:17972765-18039168	TKS4_WT	TKS4_KO	13183.3	12966.1	0.983525	-0,0239667581392133	-0.00721471	-1.64753	0.9716	0.0125125	0.9999	-	ENSG00000171953.16
ATPSCKMT	chr5:10225506-10249888	TKS4_WT	TKS4_KO	13529.8	12704.7	0.939017	-0,0907775117937466	-0.0273268	-6.09835	0.8837	0.0536951	0.9999	-	ENSG00000150756.14
ATR	chr3:142449234-142578793	TKS4_WT	TKS4_KO	100797	82600.7	0.819476	-0,287226472610409	-0.0864638	-18.0524	0.61435	0.211584	0.9999	-	ENSG00000175054.16
ATRAID	chr2:27212359-27217183	TKS4_WT	TKS4_KO	64938.2	48692	0.749821	-0,415381894532541	-0.125042	-25.0179	0.5207	0.283412	0.9999	+	ENSG00000138085.18
ATRIP	chr3:48446709-48467645	TKS4_WT	TKS4_KO	38969.9	29898.5	0.767221	-0,382285999603449	-0.11508	-23.2779	0.5465	0.26241	0.9999
ATRN	chr20:3471017-3651118	TKS4_WT	TKS4_KO	72940.3	81525	1.11769	0,160526194274397	0.0483232	11.7695	0.76375	0.117049	0.9999	+	ENSG00000088812.18
ATRNL1	chr10:115093364-115948999	TKS4_WT	TKS4_KO	1074.02	1572.68	1.46425	0,550161701816587	0.165615	46.425	0.4301	0.366431	0.9999	+	ENSG00000107518.18
ATRX	chrX:77504877-77786235	TKS4_WT	TKS4_KO	111947	110270	0.98502	-0,0217755017632545	-0.00655508	-1.49803	0.97175	0.0124455	0.9999	-	ENSG00000085224.23
ATXN1	chr6:16299111-16766883	TKS4_WT	TKS4_KO	30759.2	37510.5	1.21949	0,286275668016976	0.0861776	21.9488	0.6172	0.209574	0.9999	-	ENSG00000124788.19
ATXN10	chr22:45671833-45845307	TKS4_WT	TKS4_KO	107372	115607	1.0767	0,10661083723513	0.0320931	7.66959	0.859	0.0660068	0.9999	+	ENSG00000130638.17
ATXN1L	chr16:71845975-71857328	TKS4_WT	TKS4_KO	59208.3	60203.1	1.0168	0,0240383049940521	0.00723625	1.68017	0.96295	0.0163963	0.9999	+	ENSG00000224470.9
ATXN2	chr12:111452213-111600255	TKS4_WT	TKS4_KO	42267	41238.4	0.975664	-0,0355432732124104	-0.0106996	-2.43357	0.95405	0.0204289	0.9999	-	ENSG00000204842.18
ATXN2L	chr16:28822998-28837237	TKS4_WT	TKS4_KO	105707	124964	1.18217	0,241441412280761	0.0726811	18.2173	0.73085	0.136172	0.9999	+	ENSG00000168488.19
ATXN3	chr14:92058551-92106582	TKS4_WT	TKS4_KO	26885.8	23924.5	0.889857	-0,168354962126542	-0.0506799	-11.0143	0.75375	0.122773	0.9999	-	ENSG00000066427.25
ATXN7	chr3:63816945-64003462	TKS4_WT	TKS4_KO	44826	45045.4	1.00489	0,00704400323976671	0.00212046	0.489447	0.99265	0.00320385	0.9999	+	ENSG00000163635.20
ATXN7L1	chr7:105604771-106036432	TKS4_WT	TKS4_KO	18095.7	15508	0.857	-0,222632946366677	-0.0670192	-14.3	0.7106	0.148375	0.9999	-	ENSG00000146776.15
ATXN7L2	chr1:109483904-109492804	TKS4_WT	TKS4_KO	6005.2	7118.64	1.18541	0,245385591386045	0.0738684	18.541	0.6838	0.165071	0.9999	+	ENSG00000162650.17
ATXN7L3	chr17:44186950-44223703	TKS4_WT	TKS4_KO	71222.2	85538.9	1.20101	0,264253315605645	0.0795482	20.1014	0.7578	0.120445	0.9999	-	ENSG00000087152.16
ATXN7L3B	chr12:74537834-74545430	TKS4_WT	TKS4_KO	61703.5	96626.4	1.56598	0,64706424154928	0.194786	56.5978	0.22795	0.64216	0.9999	+	ENSG00000253719.4
AUH	chr9:91213814-91361945	TKS4_WT	TKS4_KO	32823.5	38389.7	1.16958	0,225989565913193	0.0680296	16.9579	0.68035	0.167268	0.9999	-	ENSG00000148090.12
AUNIP	chr1:25819953-25859457	TKS4_WT	TKS4_KO	27665.3	20635	0.745881	-0,422982353304852	-0.12733	-25.4119	0.69515	0.157921	0.9999	-	ENSG00000127423.11
AUP1	chr2:74526651-74557551	TKS4_WT	TKS4_KO	114368	83205.7	0.727526	-0,458928703589577	-0.138151	-27.2474	0.5343	0.272215	0.9999	-	ENSG00000115307.17
AURKA	chr20:56369388-56392308	TKS4_WT	TKS4_KO	113262	88425.7	0.780718	-0,357125912936951	-0.107506	-21.9282	0.62195	0.206245	0.9999	-	ENSG00000087586.18
AURKAIP1	chr1:1373729-1375516	TKS4_WT	TKS4_KO	91289.3	75467.9	0.82669	-0,274582311062546	-0.0826575	-17.331	0.6455	0.190104	0.9999	-	ENSG00000175756.14
AURKB	chr17:8204730-8210767	TKS4_WT	TKS4_KO	52205.1	42090.5	0.806253	-0,310695440992856	-0.0935286	-19.3747	0.5667	0.246647	0.9999	-	ENSG00000178999.13
AURKC	chr19:57230316-57235550	TKS4_WT	TKS4_KO	252.796	489.782	1.93709	0,953890064474537	0.28715	93.7089	0.53185	0.274211	0.9999	+	ENSG00000105146.14
AVEN	chr15:33310772-34074877	TKS4_WT	TKS4_KO	13563.7	12590.4	0.928243	-0,107425839711383	-0.0323384	-7.17572	0.87925	0.0558876	0.9999	-	ENSG00000169857.9
AVL9	chr7:32495488-32719168	TKS4_WT	TKS4_KO	134023	138375	1.03247	0,0461026769568903	0.0138783	3.2472	0.934	0.0296531	0.9999	+	ENSG00000105778.20
AVPI1	chr10:97677421-97687432	TKS4_WT	TKS4_KO	15193.3	25206.6	1.65906	0,730362502170309	0.219861	65.9056	0.1916	0.717604	0.9999	-	ENSG00000119986.7
AVPR2	chrX:153902624-153907166	TKS4_WT	TKS4_KO	215.899	205.251	0.950703	-0,0729326603877553	-0.0219549	-4.92965	0.9401	0.0268259	0.9999	+	ENSG00000126895.16
AXDND1	chr1:179365703-179575987	TKS4_WT	TKS4_KO	2129.97	1671.93	0.784965	-0,349300109321991	-0.10515	-21.5035	0.48205	0.316908	0.9999	+	ENSG00000162779.22
AXIN1	chr16:287439-355226	TKS4_WT	TKS4_KO	28435.5	25938.3	0.912181	-0,132608755667005	-0.0399192	-8.78195	0.80245	0.095582	0.9999	-	ENSG00000103126.15
AXIN2	chr17:65528562-65561648	TKS4_WT	TKS4_KO	14205.7	15692.4	1.10465	0,143595129696676	0.0432264	10.4654	0.81765	0.0874326	0.9999	-	ENSG00000168646.14
AXL	chr19:41219222-41261767	TKS4_WT	TKS4_KO	114882	113291	0.986151	-0,0201194970348972	-0.00605657	-1.3849	0.9717	0.0124678	0.9999	+	ENSG00000167601.12
AZGP1	chr7:99966729-99976031	TKS4_WT	TKS4_KO	160.94	202.332	1.25703	0,330018288708692	0.0993454	25.7029	0.79345	0.10048	0.9999	-	ENSG00000160862.13
AZI2	chr3:28241592-28526358	TKS4_WT	TKS4_KO	38133	33744.7	0.884921	-0,176378615440881	-0.0530953	-11.5079	0.827	0.0824945	0.9999	-	ENSG00000163512.14
AZIN1	chr8:102826301-102864200	TKS4_WT	TKS4_KO	273461	287693	1.05204	0,0731949966440993	0.0220339	5.2044	0.9012	0.0451788	0.9999	-	ENSG00000155096.15
AZIN2	chr1:33081151-33184774	TKS4_WT	TKS4_KO	3673.46	5609.26	1.52695	0,610657337661471	0.183826	52.6955	0.35685	0.447514	0.9999	+	ENSG00000142920.17
B3GALNT1	chr3:161083882-161105469	TKS4_WT	TKS4_KO	18791.9	14251.6	0.758392	-0,398984598463487	-0.120106	-24.1608	0.54195	0.266041	0.9999	-	ENSG00000169255.15
B3GALNT2	chr1:235367426-235504481	TKS4_WT	TKS4_KO	69101.3	67476.2	0.976482	-0,03433407307199	-0.0103356	-2.35176	0.9544	0.0202696	0.9999	-	ENSG00000162885.14
B3GALT1	chr2:167293000-167941144	TKS4_WT	TKS4_KO	7393.31	197.374	0.0267095	-5,22650529841706	-1.57333	-97.3291	0.15905	0.798466	0.9999	+	ENSG00000172318.6
B3GALT2	chr1:193121266-193254815	TKS4_WT	TKS4_KO	164.878	516.808	3.13319	1,64763387822408	0.495987	213.319	0.5279	0.277448	0.9999	-	ENSG00000162630.6
B3GALT4	chr6:33277122-33289239	TKS4_WT	TKS4_KO	898.953	1160.51	1.29093	0,368405192990088	0.110901	29.0925	0.8254	0.0833355	0.9999	+	ENSG00000235863.4
B3GALT5	chr21:39612939-39802096	TKS4_WT	TKS4_KO	5452.53	7346.77	1.3474	0,430177485335966	0.129496	34.7399	0.49695	0.303687	0.9999	+	ENSG00000183778.19
B3GALT6	chr1:1232236-1235041	TKS4_WT	TKS4_KO	22206.7	27927	1.25759	0,330664253864081	0.0995399	25.7592	0.51905	0.284791	0.9999	+	ENSG00000176022.7
B3GALT9	chr9:120793466-120801787	TKS4_WT	TKS4_KO	12482.5	11322	0.907031	-0,140776893242465	-0.0423781	-9.29694	0.7987	0.0976163	0.9999	+	ENSG00000214654.9
B3GAT1	chr11:134378503-134412242	TKS4_WT	TKS4_KO	119.335	22.1427	0.186233	-2,42482184531546	-0.729944	-81.3767	0.2538	0.595508	0.9999	-	ENSG00000109956.13
B3GAT2	chr6:70667882-70957060	TKS4_WT	TKS4_KO	303.047	86.4223	0.285414	-1,80887362361399	-0.544525	-71.4586	0.5031	0.298346	0.9999	-	ENSG00000112309.11
B3GAT3	chr11:62615295-62621986	TKS4_WT	TKS4_KO	35186.2	44217.2	1.25666	0,329597117796998	0.0992186	25.6662	0.53025	0.275519	0.9999	-	ENSG00000149541.10
B3GLCT	chr13:31199974-31332276	TKS4_WT	TKS4_KO	17391.8	16992.1	0.977018	-0,0335428982607297	-0.0100974	-2.2982	0.9553	0.0198602	0.9999	+	ENSG00000187676.8
B3GNT2	chr2:62196114-62224731	TKS4_WT	TKS4_KO	36856.7	39487.6	1.07138	0,0994725210541517	0.0299442	7.13817	0.84955	0.0708111	0.9999	+	ENSG00000170340.11
B3GNT3	chr19:17794827-17813576	TKS4_WT	TKS4_KO	13528.8	21444.9	1.58513	0,664596773707004	0.200064	58.5125	0.2438	0.612966	0.9999	+	ENSG00000179913.11
B3GNT4	chr12:122203708-122228792	TKS4_WT	TKS4_KO	6122.23	5975.98	0.976112	-0,0348813485501165	-0.0105003	-2.3888	0.98555	0.00632134	0.9999	+	ENSG00000176383.9
B3GNT5	chr3:183176115-183428619	TKS4_WT	TKS4_KO	41108.1	34566.9	0.840878	-0,250030801714598	-0.0752668	-15.9122	0.649	0.187755	0.9999	+	ENSG00000176597.12
B3GNT7	chr2:231395709-231401164	TKS4_WT	TKS4_KO	5597.72	5791.9	1.03469	0,049196505164176	0.0148096	3.46885	0.93595	0.0287474	0.9999	+	ENSG00000156966.7
B3GNT8	chr19:41425358-41428730	TKS4_WT	TKS4_KO	54.9594	89.7641	1.63213	0,706755997021489	0.212755	63.213	1	0	1	-	ENSG00000177191.3
B3GNT9	chr16:67109880-67150998	TKS4_WT	TKS4_KO	2924.49	5776.73	1.97526	0,982043653209719	0.295625	97.5261	0.62035	0.207363	0.9999	-	ENSG00000237172.4
B3GNTL1	chr17:82752047-83051845	TKS4_WT	TKS4_KO	10842.3	11928.9	1.10022	0,137788970739209	0.0414786	10.0218	0.889	0.0510982	0.9999	-	ENSG00000175711.9
B4GALNT1	chr12:57618404-57633239	TKS4_WT	TKS4_KO	36100.4	36331.1	1.00639	0,00919019908195814	0.00276653	0.639049	0.98795	0.00526503	0.9999	-	ENSG00000135454.14
B4GALNT3	chr12:459938-563509	TKS4_WT	TKS4_KO	10889.1	13360.2	1.22693	0,295054436239971	0.0888202	22.6931	0.6462	0.189633	0.9999	+	ENSG00000139044.12
B4GALNT4	chr11:369498-382117	TKS4_WT	TKS4_KO	25107.2	32199.8	1.28249	0,358949316144001	0.108055	28.2492	0.54475	0.263803	0.9999	+	ENSG00000182272.12
B4GALT1	chr9:33104076-33179983	TKS4_WT	TKS4_KO	52977.9	54476.9	1.02829	0,0402538767974701	0.0121176	2.82948	0.9398	0.0269646	0.9999	-	ENSG00000086062.13
B4GALT2	chr1:43979209-43991171	TKS4_WT	TKS4_KO	63840.8	70004.8	1.09655	0,132974917013256	0.0400294	9.65525	0.794	0.100179	0.9999	+	ENSG00000117411.18
B4GALT4	chr3:119211741-119290666	TKS4_WT	TKS4_KO	14213.6	10570.7	0.743705	-0,427197590372178	-0.128599	-25.6295	0.4809	0.317945	0.9999	-	ENSG00000121578.13
B4GALT5	chr20:49632944-49713878	TKS4_WT	TKS4_KO	218735	275524	1.25962	0,332993770907994	0.100241	25.9625	0.5514	0.258533	0.9999	-	ENSG00000158470.5
B4GALT6	chr18:31621035-31725686	TKS4_WT	TKS4_KO	15093.4	24028.4	1.59198	0,670819201606232	0.201937	59.1977	0.3005	0.522156	0.9999	-	ENSG00000118276.12
B4GALT7	chr5:177600101-177610330	TKS4_WT	TKS4_KO	17835.4	17416.5	0.976513	-0,0342886466673731	-0.0103219	-2.34869	0.95115	0.021751	0.9999	+	ENSG00000027847.14
B4GAT1	chr11:66345373-66347629	TKS4_WT	TKS4_KO	9861.01	9934.34	1.00744	0,0106885952914477	0.00321759	0.743628	0.9844	0.00682839	0.9999	-	ENSG00000174684.7
B9D1	chr17:19237376-19387190	TKS4_WT	TKS4_KO	10835.2	13562.2	1.25168	0,323862764346549	0.0974924	25.1677	0.69545	0.157734	0.9999	-	ENSG00000108641.20
B9D2	chr19:41354416-41384083	TKS4_WT	TKS4_KO	3052.47	3677.11	1.20463	0,268587190315208	0.0808528	20.4628	0.75865	0.119959	0.9999	-	ENSG00000123810.9
BAAT	chr9:101360416-101385006	TKS4_WT	TKS4_KO	829.869	501.001	0.603759	-0,727956034841814	-0.219137	-39.6241	0.51015	0.292302	0.9999	-	ENSG00000136881.12
BABAM1	chr19:17267442-17279337	TKS4_WT	TKS4_KO	51069.1	43814.6	0.857948	-0,221038478617329	-0.0665392	-14.2052	0.6956	0.15764	0.9999	+	ENSG00000105393.16
BABAM2	chr2:27781378-28338901	TKS4_WT	TKS4_KO	27963.4	20787.1	0.743369	-0,427849501535388	-0.128796	-25.6631	0.4935	0.306713	0.9999	+	ENSG00000158019.21
BACE1	chr11:117232670-117316256	TKS4_WT	TKS4_KO	8255.28	10698.4	1.29594	0,374002005599127	0.112586	29.5943	0.74005	0.130739	0.9999	-	ENSG00000186318.18
BACE2	chr21:41168159-41282530	TKS4_WT	TKS4_KO	25534.7	25541.7	1.00027	0,000395439999900296	0.000119039	0.0274136	0.99945	0.000238928	0.9999	+	ENSG00000182240.16
BACH1	chr21:29298921-29361894	TKS4_WT	TKS4_KO	61350.2	59699.2	0.973089	-0,039356383245756	-0.0118475	-2.6911	0.9423	0.0258108	0.9999	+	ENSG00000156273.16
BACH2	chr6:89926527-90296843	TKS4_WT	TKS4_KO	5946.31	6739.59	1.1334	0,180663295178837	0.0543851	13.3405	0.77015	0.113425	0.9999	-	ENSG00000112182.16
BAD	chr11:64269827-64289500	TKS4_WT	TKS4_KO	28179.3	29865.7	1.05985	0,0838534731397574	0.0252424	5.98451	0.8953	0.0480314	0.9999	-	ENSG00000002330.14
BAG1	chr9:33252470-33264708	TKS4_WT	TKS4_KO	43848.7	35977.8	0.820499	-0,285426381166411	-0.0859219	-17.9501	0.6225	0.205861	0.9999	-	ENSG00000107262.26
BAG2	chr6:57172325-57222307	TKS4_WT	TKS4_KO	105140	84243.3	0.801249	-0,319677443453948	-0.0962325	-19.8751	0.5832	0.234182	0.9999	+	ENSG00000112208.11
BAG3	chr10:119651379-119677819	TKS4_WT	TKS4_KO	75345.3	59734.8	0.792814	-0,334945365244736	-0.100829	-20.7186	0.51945	0.284456	0.9999	+	ENSG00000151929.10
BAG4	chr8:38176854-38213301	TKS4_WT	TKS4_KO	95005.8	79836.9	0.840337	-0,250959599442905	-0.0755464	-15.9663	0.66825	0.175061	0.9999	+	ENSG00000156735.11
BAG5	chr14:103556550-103562657	TKS4_WT	TKS4_KO	67717.3	60882.6	0.89907	-0,153494241940535	-0.0462064	-10.093	0.778	0.10902	0.9999	-	ENSG00000166170.12
BAHCC1	chr17:81395430-81472520	TKS4_WT	TKS4_KO	62346.2	57435.9	0.921242	-0,11834866506274	-0.0356265	-7.87585	0.86925	0.0608553	0.9999	+	ENSG00000266074.10
BAHD1	chr15:40439756-40468237	TKS4_WT	TKS4_KO	39216.9	39407.4	1.00486	0,00699105095977131	0.00210452	0.485759	0.99	0.00436481	0.9999	+	ENSG00000140320.12
BAIAP2	chr17:81035130-81183166	TKS4_WT	TKS4_KO	55420.5	58879.3	1.06241	0,0873406399918119	0.0262922	6.241	0.87335	0.0588117	0.9999	+	ENSG00000175866.16
BAIAP2L1	chr7:98281672-98401090	TKS4_WT	TKS4_KO	69967.8	74249.7	1.0612	0,0856939482661513	0.0257964	6.11981	0.89605	0.0476678	0.9999	-	ENSG00000006453.14
BAIAP2L2	chr22:38084888-38110944	TKS4_WT	TKS4_KO	404.319	450.014	1.11299	0,154439659842725	0.046491	11.2989	0.8692	0.0608803	0.9999	-	ENSG00000128298.18
BAIAP3	chr16:1333644-1351878	TKS4_WT	TKS4_KO	11304.4	24160.6	2.13726	1,09576507114841	0.329858	113.726	0.4636	0.333857	0.9999	+	ENSG00000007516.14
BAK1	chr6:33572551-33580296	TKS4_WT	TKS4_KO	28917.3	27083.3	0.936578	-0,0945289800324097	-0.0284561	-6.3422	0.86515	0.0629086	0.9999	-	ENSG00000030110.14
BAMBI	chr10:28677520-28682932	TKS4_WT	TKS4_KO	4325.18	3587.53	0.829456	-0,269762419950482	-0.0812066	-17.0544	0.66685	0.175972	0.9999	+	ENSG00000095739.11
BANF1	chr11:65996544-66004149	TKS4_WT	TKS4_KO	37588.1	64690.3	1.72103	0,783271803227067	0.235788	72.1029	0.5817	0.235301	0.9999	+	ENSG00000175334.8
BANK1	chr4:101790481-102074812	TKS4_WT	TKS4_KO	1712.3	3894.48	2.27434	1,18544801264884	0.356855	127.434	0.09385	1.02757	0.9999	+	ENSG00000153064.12
BANP	chr16:87949215-88077318	TKS4_WT	TKS4_KO	18378.3	17560.2	0.955486	-0,0656936808363602	-0.0197758	-4.45142	0.8998	0.045854	0.9999	+	ENSG00000172530.21
BAP1	chr3:52401003-52410030	TKS4_WT	TKS4_KO	62603.9	57649.4	0.92086	-0,118946743909543	-0.0358065	-7.91403	0.8086	0.0922663	0.9999	-	ENSG00000163930.10
BARD1	chr2:214725644-214809683	TKS4_WT	TKS4_KO	41620.4	31534.7	0.757675	-0,40034951334322	-0.120517	-24.2325	0.50385	0.297699	0.9999	-	ENSG00000138376.11
BARX2	chr11:129375236-129452279	TKS4_WT	TKS4_KO	307.755	132.856	0.431879	-1,21130211595821	-0.364638	-56.8121	0.4426	0.353989	0.9999	+	ENSG00000043039.7
BASP1	chr5:17130027-17276834	TKS4_WT	TKS4_KO	82.439	0	0.00121155	-9,68893214927571	-2.91666	-99.8788	1	0	1	+	ENSG00000176788.9
BATF2	chr11:64987944-64996971	TKS4_WT	TKS4_KO	1052.02	1039.51	0.98811	-0,0172568449581108	-0.00519483	-1.18903	0.9861	0.00607904	0.9999	-	ENSG00000168062.10
BATF3	chr1:212686416-212699943	TKS4_WT	TKS4_KO	2109.6	2462.97	1.1675	0,223419767718095	0.0672561	16.7498	0.74855	0.125779	0.9999	-	ENSG00000123685.9
BAX	chr19:48954824-48961798	TKS4_WT	TKS4_KO	20473.6	24381.4	1.19087	0,252015036980014	0.0758641	19.0869	0.67025	0.173763	0.9999	+	ENSG00000087088.21
BAZ1A	chr14:34752730-34876463	TKS4_WT	TKS4_KO	98224.7	83280	0.847852	-0,238115524170671	-0.0716799	-15.2148	0.7007	0.154468	0.9999	-	ENSG00000198604.11
BAZ1B	chr7:73440405-73522293	TKS4_WT	TKS4_KO	208541	178327	0.855117	-0,225805780011308	-0.0679743	-14.4883	0.69675	0.156923	0.9999	-	ENSG00000009954.11
BAZ2A	chr12:56520405-56636816	TKS4_WT	TKS4_KO	150240	158543	1.05526	0,0776051624965961	0.0233615	5.52649	0.9299	0.0315638	0.9999	-	ENSG00000076108.12
BAZ2B	chr2:159315311-159712442	TKS4_WT	TKS4_KO	33653.3	32028.6	0.951723	-0,0713870252170199	-0.0214896	-4.82774	0.9023	0.044649	0.9999	-	ENSG00000123636.19
BBC3	chr19:47220821-47232998	TKS4_WT	TKS4_KO	13306.4	17641.5	1.32579	0,406850261641112	0.122474	32.5788	0.56035	0.251541	0.9999	-	ENSG00000105327.18
BBIP1	chr10:110871927-110919366	TKS4_WT	TKS4_KO	26046.3	18003.3	0.691205	-0,532814594479008	-0.160393	-30.8795	0.65675	0.1826	0.9999	-	ENSG00000214413.9
BBOF1	chr14:74019348-74084453	TKS4_WT	TKS4_KO	3829.78	3402.94	0.88855	-0,170475080385476	-0.0513181	-11.145	0.8541	0.0684913	0.9999	+	ENSG00000119636.16
BBS1	chr11:66510634-66546184	TKS4_WT	TKS4_KO	9931.54	13637.9	1.37319	0,457528216921126	0.13773	37.3187	0.62005	0.207573	0.9999	+	ENSG00000174483.20
BBS10	chr12:76344473-76348415	TKS4_WT	TKS4_KO	28650.8	34545.3	1.20574	0,269913158331529	0.081252	20.5735	0.60035	0.221595	0.9999	-	ENSG00000179941.9
BBS12	chr4:122700436-122744943	TKS4_WT	TKS4_KO	5303.4	6788.8	1.28008	0,356233066314059	0.107237	28.0079	0.5844	0.23329	0.9999	+	ENSG00000181004.10
BBS2	chr16:56451523-56520095	TKS4_WT	TKS4_KO	19397.6	26405.1	1.36125	0,444936467698341	0.133939	36.1254	0.75325	0.123061	0.9999	-	ENSG00000125124.14
BBS4	chr15:72675797-72738476	TKS4_WT	TKS4_KO	10781.9	10535.7	0.977166	-0,0333249502451618	-0.0100318	-2.28344	0.9559	0.0195875	0.9999	+	ENSG00000140463.14
BBS5	chr2:169479493-169506655	TKS4_WT	TKS4_KO	4395.8	3554.85	0.808697	-0,306329298922832	-0.0922143	-19.1303	0.63435	0.197671	0.9999	+	ENSG00000163093.12
BBS7	chr4:121824328-121870497	TKS4_WT	TKS4_KO	30233.9	24044	0.795267	-0,330488936752851	-0.0994871	-20.4733	0.5854	0.232547	0.9999	-	ENSG00000138686.10
BBS9	chr7:33129243-33637238	TKS4_WT	TKS4_KO	11143	13084.4	1.17422	0,231708150584892	0.0697511	17.4224	0.72325	0.140712	0.9999	+	ENSG00000122507.21
BBX	chr3:107522961-107811339	TKS4_WT	TKS4_KO	138672	126846	0.91472	-0,128598392115736	-0.038712	-8.52803	0.80805	0.0925618	0.9999	+	ENSG00000114439.19
BCAM	chr19:44809058-44821421	TKS4_WT	TKS4_KO	19294.1	33993.1	1.76184	0,817078952185124	0.245965	76.1835	0.23535	0.628286	0.9999	+	ENSG00000187244.12
BCAN	chr1:156637781-156661409	TKS4_WT	TKS4_KO	445.924	1351.76	3.03091	1,59975250540313	0.481573	203.091	0.30415	0.516912	0.9999	+	ENSG00000132692.19
BCAP29	chr7:107168986-107623317	TKS4_WT	TKS4_KO	53480.6	40071.1	0.749265	-0,416452634386797	-0.125365	-25.0735	0.69215	0.1598	0.9999
BCAP31	chrX:153700491-153724746	TKS4_WT	TKS4_KO	90990.1	112887	1.24065	0,311097558870305	0.0936497	24.0651	0.5705	0.243744	0.9999	-	ENSG00000185825.17
BCAR1	chr16:75226382-75268007	TKS4_WT	TKS4_KO	32036.2	62223.9	1.9423	0,957763605118512	0.288316	94.2297	0.11685	0.932371	0.9999	-	ENSG00000050820.17
BCAR3	chr1:93448066-93847219	TKS4_WT	TKS4_KO	25616.3	35913.7	1.40198	0,487470570246546	0.146743	40.1985	0.6398	0.193956	0.9999	-	ENSG00000137936.18
BCAS1	chr20:53943537-54070594	TKS4_WT	TKS4_KO	238.671	292.628	1.22598	0,293933124616515	0.0884827	22.5978	0.68525	0.164151	0.9999	-	ENSG00000064787.14
BCAS2	chr1:114567556-114581615	TKS4_WT	TKS4_KO	50075.8	32508.6	0.649189	-0,623290580597339	-0.187629	-35.0811	0.33675	0.472692	0.9999	-	ENSG00000116752.6
BCAS3	chr17:60677850-61392831	TKS4_WT	TKS4_KO	24829.5	23941.6	0.96424	-0,0525354245065716	-0.0158147	-3.57597	0.92415	0.0342575	0.9999	+	ENSG00000141376.23
BCAS4	chr20:50794893-50877736	TKS4_WT	TKS4_KO	15122.7	18181.8	1.20228	0,265777687790359	0.0800071	20.2284	0.67595	0.170085	0.9999	+	ENSG00000124243.19
BCAT2	chr19:48795063-48811029	TKS4_WT	TKS4_KO	31657.6	34588.1	1.09257	0,127723492175616	0.0384486	9.25683	0.82515	0.0834671	0.9999	-	ENSG00000105552.15
BCCIP	chr10:125823545-125881292	TKS4_WT	TKS4_KO	134493	103019	0.765981	-0,384620317525918	-0.115782	-23.4019	0.64635	0.189532	0.9999	+	ENSG00000107949.17
BCDIN3D	chr12:49791138-49843106	TKS4_WT	TKS4_KO	7571.55	7101.86	0.937967	-0,0923904891479193	-0.0278123	-6.20327	0.94675	0.0237647	0.9999	-	ENSG00000186666.6
BCKDHA	chr19:41397817-41425002	TKS4_WT	TKS4_KO	18526.9	20450.6	1.10383	0,142520934852761	0.0429031	10.3832	0.7918	0.101385	0.9999	+	ENSG00000248098.12
BCKDHB	chr6:80106609-80469088	TKS4_WT	TKS4_KO	29787.3	31513.6	1.05795	0,0812769469307937	0.0244668	5.7954	0.89535	0.0480072	0.9999	+	ENSG00000083123.15
BCKDK	chr16:31108380-31117651	TKS4_WT	TKS4_KO	36360.4	39841.4	1.09574	0,131899926284513	0.0397058	9.57358	0.81005	0.0914882	0.9999	+	ENSG00000103507.14
BCL10	chr1:85265775-85278088	TKS4_WT	TKS4_KO	37395.5	44260.3	1.18357	0,243147958144849	0.0731948	18.3572	0.6457	0.189969	0.9999	-	ENSG00000142867.14
BCL11A	chr2:60450519-60553654	TKS4_WT	TKS4_KO	183.711	451.868	2.45887	1,29799752535641	0.390736	145.887	0.05915	1.22805	0.9999	-	ENSG00000119866.22
BCL11B	chr14:99169286-99272197	TKS4_WT	TKS4_KO	2008.24	2834.87	1.4116	0,497329938829863	0.149711	41.1599	0.5445	0.264002	0.9999	-	ENSG00000127152.18
BCL2	chr18:63123345-63320280	TKS4_WT	TKS4_KO	3272.31	2711.92	0.828753	-0,270985696976963	-0.0815748	-17.1247	0.70275	0.153199	0.9999	-	ENSG00000171791.14
BCL2L1	chr20:31664451-31723963	TKS4_WT	TKS4_KO	181384	212910	1.17381	0,231196393984789	0.069597	17.3808	0.7014	0.154034	0.9999	-	ENSG00000171552.14
BCL2L10	chr15:52109262-52112775	TKS4_WT	TKS4_KO	64.376	0	0.00155096	-9,33261843365355	-2.8094	-99.8449	1	0	1	-	ENSG00000137875.4
BCL2L11	chr2:111120913-111168445	TKS4_WT	TKS4_KO	27224.1	30325.8	1.11393	0,155660806634211	0.0468586	11.3932	0.7876	0.103694	0.9999	+	ENSG00000153094.24
BCL2L12	chr19:49659568-49673916	TKS4_WT	TKS4_KO	23556.7	20255.7	0.859871	-0,217808508882224	-0.0655669	-14.0129	0.8267	0.0826521	0.9999	+	ENSG00000126453.10
BCL2L13	chr22:17628854-17730855	TKS4_WT	TKS4_KO	60540.2	64806.9	1.07048	0,0982538270986565	0.0295773	7.0477	0.8657	0.0626326	0.9999	+	ENSG00000099968.18
BCL2L14	chr12:12049848-12099695	TKS4_WT	TKS4_KO	32.188	68.8147	2.13437	1,09381367340273	0.329271	113.437	1	0	1	+	ENSG00000121380.12
BCL2L15	chr1:113812611-113914086	TKS4_WT	TKS4_KO	825.931	1433.82	1.73592	0,795696706245205	0.239529	73.5915	0.6752	0.170568	0.9999	-	ENSG00000188761.13
BCL6	chr3:187698258-187745472	TKS4_WT	TKS4_KO	14809.8	23322.6	1.5748	0,655172915508238	0.197227	57.4805	0.35115	0.454507	0.9999	-	ENSG00000113916.18
BCL6B	chr17:7023049-7029644	TKS4_WT	TKS4_KO	321.88	446.03	1.38558	0,470493088193915	0.141633	38.5583	0.6762	0.169925	0.9999	+	ENSG00000161940.11
BCL7A	chr12:122021883-122062044	TKS4_WT	TKS4_KO	15989.3	20258	1.26697	0,341383067724572	0.102767	26.6971	0.5273	0.277942	0.9999	+	ENSG00000110987.9
BCL7B	chr7:73536355-73557690	TKS4_WT	TKS4_KO	25211.9	23257.2	0.922469	-0,116426947504301	-0.035048	-7.75305	0.83635	0.0776119	0.9999	-	ENSG00000106635.8
BCL7C	chr16:30833625-30895220	TKS4_WT	TKS4_KO	33177.7	30497.5	0.919217	-0,121522510558715	-0.0365819	-8.07829	0.82465	0.0837303	0.9999	-	ENSG00000099385.12
BCL9	chr1:147541500-147670524	TKS4_WT	TKS4_KO	37200.7	38645.2	1.03883	0,0549593190934583	0.0165444	3.88298	0.9394	0.0271494	0.9999	+	ENSG00000116128.12
BCL9L	chr11:118883891-118926071	TKS4_WT	TKS4_KO	128497	144085	1.12131	0,16518535235646	0.0497257	12.131	0.8231	0.0845474	0.9999	-	ENSG00000186174.13
BCLAF1	chr6:136256626-136289851	TKS4_WT	TKS4_KO	325080	256723	0.789723	-0,340582127405093	-0.102525	-21.0277	0.59495	0.22552	0.9999	-	ENSG00000029363.17
BCLAF3	chrX:19912859-19991040	TKS4_WT	TKS4_KO	9349.85	9882.13	1.05693	0,0798779835705704	0.0240457	5.69286	0.90265	0.0444806	0.9999	-	ENSG00000173681.17
BCO1	chr16:81238447-81291142	TKS4_WT	TKS4_KO	27.4797	0	0.00362586	-8,10746295370181	-2.44059	-99.6374	1	0	1	+	ENSG00000135697.10
BCOR	chrX:40051245-40177390	TKS4_WT	TKS4_KO	33645.1	28299.3	0.841113	-0,249629231545744	-0.0751459	-15.8887	0.73895	0.131385	0.9999	-	ENSG00000183337.18
BCORL1	chrX:129980284-130058083	TKS4_WT	TKS4_KO	48490.5	45164	0.931399	-0,102528645070594	-0.0308642	-6.86009	0.89105	0.0500979	0.9999	+	ENSG00000085185.16
BCR	chr22:23180508-23318474	TKS4_WT	TKS4_KO	67126.4	73195.2	1.09041	0,12486859174354	0.0375892	9.04084	0.8239	0.0841255	0.9999	+	ENSG00000186716.21
BCS1L	chr2:218659682-218663443	TKS4_WT	TKS4_KO	24091	25249.4	1.04808	0,0677545508046581	0.0203962	4.80841	0.91095	0.0405055	0.9999	+	ENSG00000074582.15
BDH1	chr3:197509782-197573343	TKS4_WT	TKS4_KO	19853.7	19108	0.96244	-0,0552308322525897	-0.0166261	-3.75596	0.93225	0.0304676	0.9999	-	ENSG00000161267.12
BDH2	chr4:103077591-103099862	TKS4_WT	TKS4_KO	5005.84	4124.66	0.823973	-0,27933082103609	-0.084087	-17.6027	0.67385	0.171437	0.9999	-	ENSG00000164039.15
BDKRB1	chr14:96256209-96264763	TKS4_WT	TKS4_KO	32.188	274.911	8.51744	3,09041934061526	0.930309	751.744	0.25955	0.585779	0.9999	+	ENSG00000100739.11
BDKRB2	chr14:96204838-96244164	TKS4_WT	TKS4_KO	312.463	817.366	2.61536	1,38701171958586	0.417532	161.536	0.35865	0.445329	0.9999	+	ENSG00000168398.7
BDNF	chr11:27506851-27722030	TKS4_WT	TKS4_KO	88098.2	89765.4	1.01892	0,0270468934031255	0.00814193	1.89243	0.9577	0.0187705	0.9999	-	ENSG00000176697.20
BDP1	chr5:71455635-71578288	TKS4_WT	TKS4_KO	111672	85527.8	0.765884	-0,384801767456425	-0.115837	-23.4116	0.496	0.304518	0.9999	+	ENSG00000145734.20
BEAN1	chr16:66427294-66495288	TKS4_WT	TKS4_KO	441.215	1590.5	3.60423	1,84969038654504	0.556812	260.423	0.02495	1.60293	0.9999	+	ENSG00000166546.14
BECN1	chr17:42798748-42824282	TKS4_WT	TKS4_KO	44622.2	48025.1	1.07626	0,106026744589176	0.0319172	7.62601	0.8462	0.072527	0.9999	-	ENSG00000126581.13
BECN2	chr1:241957766-241959062	TKS4_WT	TKS4_KO	32.188	0	0.00309713	-8,33485426933163	-2.50904	-99.6903	1	0	1	+	ENSG00000196289.7
BEGAIN	chr14:100537146-100587417	TKS4_WT	TKS4_KO	3813.94	4443.38	1.16503	0,220370020557833	0.066338	16.5032	0.75005	0.12491	0.9999	-	ENSG00000183092.18
BEND3	chr6:107065181-107115515	TKS4_WT	TKS4_KO	21127.9	18864.6	0.892877	-0,163467049059267	-0.0492085	-10.7123	0.76805	0.114611	0.9999	-	ENSG00000178409.14
BEND6	chr6:56954980-57027652	TKS4_WT	TKS4_KO	3733.98	5298.3	1.41893	0,504803926736548	0.151961	41.893	0.4757	0.322667	0.9999	+	ENSG00000151917.18
BEND7	chr10:13438480-13530264	TKS4_WT	TKS4_KO	14261.3	11536.4	0.808932	-0,305910015432581	-0.0920881	-19.1068	0.57455	0.240672	0.9999	-	ENSG00000165626.19
BEST1	chr11:61946721-61967634	TKS4_WT	TKS4_KO	15447.2	19559.3	1.2662	0,34050742052868	0.102503	26.6202	0.80235	0.0956361	0.9999	+	ENSG00000167995.17
BEST2	chr19:12751790-12758458	TKS4_WT	TKS4_KO	119.335	67.6214	0.567015	-0,818541971795143	-0.246406	-43.2985	0.6057	0.217742	0.9999	+	ENSG00000039987.7
BEST3	chr12:69624414-69699416	TKS4_WT	TKS4_KO	266.15	270.908	1.01787	0,0255539143955616	0.00769249	1.78704	0.97535	0.0108395	0.9999	-	ENSG00000127325.19
BEST4	chr1:44782144-44792828	TKS4_WT	TKS4_KO	307.755	513.338	1.66779	0,737939074851036	0.222142	66.7792	0.43765	0.358873	0.9999	-	ENSG00000142959.5
BET1	chr7:93962761-94067754	TKS4_WT	TKS4_KO	13865.8	10153	0.732235	-0,4496209748428	-0.135349	-26.7765	0.42975	0.366784	0.9999	-	ENSG00000105829.13
BET1L	chr11:202923-207399	TKS4_WT	TKS4_KO	41820.2	45058.8	1.07744	0,107608683014064	0.0323934	7.74409	0.84765	0.0717834	0.9999	-	ENSG00000177951.18
BEX2	chrX:103309345-103310990	TKS4_WT	TKS4_KO	15616.8	12074.3	0.773162	-0,371156602174765	-0.111729	-22.6838	0.5571	0.254067	0.9999	-	ENSG00000133134.12
BEX3	chrX:103376322-103378164	TKS4_WT	TKS4_KO	41472.9	43708	1.05389	0,0757282551170919	0.0227965	5.38929	0.88605	0.0525418	0.9999	+	ENSG00000166681.14
BEX4	chrX:103215091-103217246	TKS4_WT	TKS4_KO	160.94	44.2855	0.275618	-1,85925872304147	-0.559693	-72.4382	1	0	1	+	ENSG00000102409.10
BFAR	chr16:14632830-14669236	TKS4_WT	TKS4_KO	61963.6	56004	0.903821	-0,145890844263398	-0.0439175	-9.61789	0.79925	0.0973174	0.9999	+	ENSG00000103429.11
BFSP1	chr20:17493904-17609919	TKS4_WT	TKS4_KO	6622.17	5906.62	0.891948	-0,164968608208653	-0.0496605	-10.8052	0.9173	0.0374886	0.9999	-	ENSG00000125864.14
BFSP2	chr3:133397881-133491760	TKS4_WT	TKS4_KO	27.4797	0	0.00362586	-8,10746295370181	-2.44059	-99.6374	1	0	1	+	ENSG00000170819.5
BHLHA15	chr7:98211438-98252235	TKS4_WT	TKS4_KO	13293.3	10699.6	0.804888	-0,313139797511863	-0.0942645	-19.5112	0.74495	0.127873	0.9999	+	ENSG00000180535.4
BHLHE40	chr3:4896808-4985323	TKS4_WT	TKS4_KO	34954.2	85089.3	2.4343	1,28350947593047	0.386375	143.43	0.0389	1.41005	0.9999	+	ENSG00000134107.5
BHLHE41	chr12:26120029-26234777	TKS4_WT	TKS4_KO	2484.81	3419.22	1.37603	0,460515844627688	0.138629	37.6034	0.545	0.263603	0.9999	-	ENSG00000123095.6
BICC1	chr10:58512871-58831435	TKS4_WT	TKS4_KO	32.188	92.1506	2.85712	1,51456021496799	0.455928	185.712	1	0	1	+	ENSG00000122870.12
BICD1	chr12:32106772-32383637	TKS4_WT	TKS4_KO	47438.6	51398.1	1.08347	0,115653361021139	0.0348151	8.34656	0.8517	0.0697134	0.9999	+	ENSG00000151746.15
BICD2	chr9:92711362-92764841	TKS4_WT	TKS4_KO	63311.8	58690.2	0.927003	-0,109354609133181	-0.032919	-7.29973	0.8458	0.0727323	0.9999	-	ENSG00000185963.14
BICDL1	chr12:119989235-120094495	TKS4_WT	TKS4_KO	15366.7	14483.9	0.942551	-0,0853566859137307	-0.0256949	-5.74485	0.88385	0.0536214	0.9999	+	ENSG00000135127.12
BICDL2	chr16:3022619-3039133	TKS4_WT	TKS4_KO	4512.66	7124.27	1.57872	0,658752389494179	0.198304	57.8717	0.6921	0.159831	0.9999	-	ENSG00000162069.16
BICRA	chr19:47608195-47703277	TKS4_WT	TKS4_KO	14589.9	13744.7	0.94207	-0,0860939688463656	-0.0259169	-5.79301	0.91705	0.037607	0.9999	+	ENSG00000063169.12
BICRAL	chr6:42746986-42868560	TKS4_WT	TKS4_KO	39669.3	37267.3	0.93945	-0,0901124054580555	-0.0271265	-6.05504	0.873	0.0589858	0.9999
BID	chr22:17734137-17774665	TKS4_WT	TKS4_KO	53189.4	40784.9	0.766787	-0,383102823097074	-0.115325	-23.3213	0.5441	0.264321	0.9999	-	ENSG00000015475.19
BIK	chr22:43110749-43129712	TKS4_WT	TKS4_KO	19563.6	18072	0.923757	-0,1144150880564	-0.0344424	-7.62432	0.8332	0.0792507	0.9999	+	ENSG00000100290.3
BIN1	chr2:127048022-127107154	TKS4_WT	TKS4_KO	24230.5	25182.1	1.03927	0,0555741977988732	0.0167295	3.92727	0.9194	0.0364955	0.9999	-	ENSG00000136717.15
BIN2	chr12:51281037-51324668	TKS4_WT	TKS4_KO	96.564	110.181	1.14087	0,190133654024764	0.0572359	14.0869	1	0	1	-	ENSG00000110934.13
BIN3	chr8:22599598-22669148	TKS4_WT	TKS4_KO	22115.8	18601	0.841074	-0,249696013993626	-0.075166	-15.8926	0.85455	0.0682625	0.9999	-	ENSG00000147439.14
BIRC2	chr11:102347213-102378670	TKS4_WT	TKS4_KO	77764.6	62091.4	0.798454	-0,324719631645917	-0.0977503	-20.1546	0.55025	0.25944	0.9999	+	ENSG00000110330.10
BIRC3	chr11:102317372-102339403	TKS4_WT	TKS4_KO	4195.57	7234.34	1.72426	0,785980134862374	0.236604	72.4263	0.21255	0.672539	0.9999	+	ENSG00000023445.16
BIRC5	chr17:78214252-78225635	TKS4_WT	TKS4_KO	230235	202556	0.879779	-0,18478626062186	-0.0556262	-12.0221	0.79055	0.102071	0.9999	+	ENSG00000089685.15
BIRC6	chr2:32356906-32618899	TKS4_WT	TKS4_KO	335479	330051	0.98382	-0,0235334845026526	-0.00708428	-1.61798	0.96585	0.0150903	0.9999	+	ENSG00000115760.15
BIRC7	chr20:63235904-63240495	TKS4_WT	TKS4_KO	64.376	46.6719	0.725416	-0,463120207790324	-0.139413	-27.4584	1	0	1	+	ENSG00000101197.13
BIVM	chr13:102799118-102876001	TKS4_WT	TKS4_KO	43362	36131.7	0.833258	-0,263165499040042	-0.0792207	-16.6742	0.6244	0.204537	0.9999
BLACAT1	chr1:205373251-205469024	TKS4_WT	TKS4_KO	2816.88	6432.59	2.28354	1,19127284404133	0.358609	128.354	0.1799	0.744969	0.9999	-	ENSG00000281406.2
BLCAP	chr20:37517416-37527876	TKS4_WT	TKS4_KO	25501	30309	1.18854	0,249191533650701	0.0750141	18.8541	0.63765	0.195418	0.9999	-	ENSG00000166619.15
BLID	chr11:122028328-122422871	TKS4_WT	TKS4_KO	6146.45	7918.59	1.28831	0,365484916345673	0.110022	28.8315	0.8875	0.0518316	0.9999	-	ENSG00000259571.2
BLM	chr15:90717345-90816166	TKS4_WT	TKS4_KO	65178.3	55222.4	0.847252	-0,239137734987531	-0.0719876	-15.2748	0.71365	0.146515	0.9999	+	ENSG00000197299.13
BLMH	chr17:30248202-30291944	TKS4_WT	TKS4_KO	47348.2	50762.2	1.0721	0,100444810142167	0.0302369	7.2104	0.84965	0.0707599	0.9999	-	ENSG00000108578.15
BLOC1S2	chr10:100273277-100286712	TKS4_WT	TKS4_KO	51280.6	46998.5	0.916497	-0,125798173141902	-0.037869	-8.35032	0.8157	0.0884695	0.9999	-	ENSG00000196072.12
BLOC1S3	chr19:45162932-45202715	TKS4_WT	TKS4_KO	7624.02	8126.21	1.06587	0,0920295743539412	0.0277037	6.58686	0.9013	0.0451306	0.9999	+	ENSG00000189114.8
BLOC1S4	chr4:6716173-6717664	TKS4_WT	TKS4_KO	10707.4	12097.9	1.12986	0,176146888570911	0.0530255	12.9862	0.768	0.114639	0.9999	+	ENSG00000186222.5
BLOC1S6	chr15:45587122-45609716	TKS4_WT	TKS4_KO	95928.3	85320.1	0.889415	-0,169070646801318	-0.0508953	-11.0585	0.7681	0.114582	0.9999	+	ENSG00000104164.12
BLVRB	chr19:40447767-40465745	TKS4_WT	TKS4_KO	40808	35273.4	0.864375	-0,210270807418342	-0.0632978	-13.5625	0.6963	0.157204	0.9999	-	ENSG00000090013.11
BLZF1	chr1:169368194-169462221	TKS4_WT	TKS4_KO	28131.4	22134.6	0.78683	-0,345876660486451	-0.104119	-21.317	0.5141	0.288952	0.9999	+	ENSG00000117475.14
BMERB1	chr16:15434587-15588259	TKS4_WT	TKS4_KO	19061.6	17377.2	0.911634	-0,133472849746331	-0.0401793	-8.83657	0.80765	0.0927768	0.9999	+	ENSG00000166780.11
BMF	chr15:40087889-40108879	TKS4_WT	TKS4_KO	2200.6	1542.88	0.701131	-0,512243128151087	-0.154201	-29.8869	0.50995	0.292472	0.9999	-	ENSG00000104081.14
BMI1	chr10:22316387-22331484	TKS4_WT	TKS4_KO	166792	103660	0.621493	-0,686190267491425	-0.206564	-37.8507	0.2586	0.587371	0.9999
BMP1	chr8:22165371-22212326	TKS4_WT	TKS4_KO	30428.5	36016.8	1.18365	0,243246054884004	0.0732244	18.3653	0.6701	0.17386	0.9999	+	ENSG00000168487.20
BMP10	chr2:68860908-68871397	TKS4_WT	TKS4_KO	32.188	23.336	0.725842	-0,46227172449841	-0.139158	-27.4158	1	0	1	-	ENSG00000163217.2
BMP2K	chr4:78776349-78939438	TKS4_WT	TKS4_KO	100685	94043.5	0.934037	-0,0984485285648856	-0.029636	-6.59631	0.90595	0.0428958	0.9999	+	ENSG00000138756.19
BMP4	chr14:53949735-53956891	TKS4_WT	TKS4_KO	161874	95019.7	0.586998	-0,768572096370508	-0.231363	-41.3002	0.20495	0.688352	0.9999	-	ENSG00000125378.16
BMP5	chr6:55753652-55875590	TKS4_WT	TKS4_KO	119.335	0	0.000837276	-10,2220099598504	-3.07713	-99.9163	5e-05	4.30103	0.0171564	-	ENSG00000112175.8
BMP6	chr6:7726098-8102595	TKS4_WT	TKS4_KO	2980.22	5016.43	1.68322	0,751222535317211	0.226141	68.3219	0.7025	0.153354	0.9999	+	ENSG00000153162.9
BMP7	chr20:57168752-57267901	TKS4_WT	TKS4_KO	9300.37	16487.8	1.7728	0,8260321301078	0.24866	77.2803	0.15825	0.800656	0.9999	-	ENSG00000101144.13
BMP8A	chr1:39491625-39559698	TKS4_WT	TKS4_KO	9899.95	14717	1.48657	0,571985700163784	0.172185	48.6568	0.43695	0.359568	0.9999	+	ENSG00000183682.8
BMP8B	chr1:39738844-39788865	TKS4_WT	TKS4_KO	17959.1	19986.6	1.11289	0,15431720259597	0.0464541	11.2895	0.92895	0.0320077	0.9999	-	ENSG00000116985.12
BMPR1A	chr10:86755785-86927969	TKS4_WT	TKS4_KO	70169	70883.9	1.01019	0,0146241594995462	0.00440231	1.01882	0.9784	0.00948356	0.9999	+	ENSG00000107779.14
BMPR1B	chr4:94757954-95158453	TKS4_WT	TKS4_KO	151.523	156.853	1.03515	0,0498439894175466	0.0150045	3.5153	0.93695	0.0282836	0.9999	+	ENSG00000138696.11
BMPR2	chr2:202376309-202567751	TKS4_WT	TKS4_KO	52339.1	52247.9	0.998258	-0,00251605972964036	-0.000757409	-0.174248	0.9956	0.00191511	0.9999	+	ENSG00000204217.16
BMS1	chr10:42782774-42834937	TKS4_WT	TKS4_KO	157339	145561	0.925143	-0,112252377610064	-0.0337913	-7.48574	0.843	0.0741724	0.9999	+	ENSG00000165733.8
BMT2	chr7:112819146-112939875	TKS4_WT	TKS4_KO	11087.3	11481.5	1.03555	0,0504026079204565	0.0151727	3.55539	0.92855	0.0321947	0.9999	-	ENSG00000164603.12
BNIP1	chr5:173144446-173164387	TKS4_WT	TKS4_KO	10325.8	11192.4	1.08392	0,116264786577355	0.0349992	8.39249	0.83165	0.0800594	0.9999	+	ENSG00000113734.18
BNIP2	chr15:59659145-59689320	TKS4_WT	TKS4_KO	78904.8	72827.6	0.922981	-0,115627610934349	-0.0348074	-7.70193	0.82435	0.0838884	0.9999	-	ENSG00000140299.13
BNIP3	chr10:131900933-131982013	TKS4_WT	TKS4_KO	28685.7	23870.5	0.83214	-0,265101923184862	-0.0798036	-16.786	0.7158	0.145208	0.9999	-	ENSG00000176171.12
BNIP3L	chr8:26383053-26413127	TKS4_WT	TKS4_KO	45345.3	44348.7	0.978022	-0,0320611377363752	-0.00965136	-2.1978	0.9519	0.0214087	0.9999	+	ENSG00000104765.16
BOC	chr3:113211002-113441514	TKS4_WT	TKS4_KO	1759.38	2158.58	1.22689	0,295000280843617	0.0888039	22.6885	0.58775	0.230807	0.9999	+	ENSG00000144857.15
BOD1	chr5:173607144-173617072	TKS4_WT	TKS4_KO	46090.2	43663.9	0.947358	-0,0780188584272778	-0.023486	-5.26423	0.88405	0.0535232	0.9999	-	ENSG00000145919.11
BOD1L1	chr4:13568737-13627725	TKS4_WT	TKS4_KO	54909.2	42138.5	0.767422	-0,381908136205024	-0.114966	-23.2578	0.50145	0.299772	0.9999	-	ENSG00000038219.13
BOK	chr2:241544383-241583536	TKS4_WT	TKS4_KO	38072.2	36951.2	0.970556	-0,0431166063687826	-0.0129794	-2.9444	0.93815	0.0277277	0.9999	+	ENSG00000176720.6
BOLA1	chr1:149899567-149900795	TKS4_WT	TKS4_KO	9697.67	7344.71	0.757371	-0,400927867286989	-0.120691	-24.2629	0.5387	0.268653	0.9999	+	ENSG00000178096.9
BOLA2	chr16:29425410-29467578	TKS4_WT	TKS4_KO	17174.4	13077.3	0.761443	-0,393192360489793	-0.118363	-23.8557	0.5018	0.299469	0.9999
BOLA2B	chr16:30192931-30193666	TKS4_WT	TKS4_KO	1425.01	1199.08	0.841465	-0,249025053672468	-0.074964	-15.8535	0.8066	0.0933418	0.9999	-	ENSG00000169627.9
BOLA3	chr2:74135399-74147912	TKS4_WT	TKS4_KO	28213.4	17800	0.630907	-0,664500303045251	-0.200035	-36.9093	0.33845	0.470505	0.9999	-	ENSG00000163170.12
BOLL	chr2:197726878-197786312	TKS4_WT	TKS4_KO	32.188	0	0.00309713	-8,33485426933163	-2.50904	-99.6903	1	0	1	-	ENSG00000152430.19
BOP1	chr8:144262044-144291438	TKS4_WT	TKS4_KO	192243	173851	0.904329	-0,145079622434157	-0.0436733	-9.56705	0.8025	0.095555	0.9999	-	ENSG00000261236.8
BORA	chr13:72727922-72781900	TKS4_WT	TKS4_KO	50678	36752.4	0.725215	-0,463520047503418	-0.139533	-27.4785	0.7188	0.143392	0.9999	+	ENSG00000136122.18
BORCS5	chr12:12357077-12471233	TKS4_WT	TKS4_KO	14206.4	12210.5	0.859508	-0,218417074517141	-0.0657501	-14.0492	0.6957	0.157578	0.9999	+	ENSG00000165714.11
BORCS6	chr17:8188344-8190180	TKS4_WT	TKS4_KO	7605.27	8672.37	1.14031	0,189424508384057	0.0570225	14.0309	0.73255	0.135163	0.9999	-	ENSG00000196544.8
BORCS8	chr19:19145566-19192152	TKS4_WT	TKS4_KO	11620.3	9489.36	0.816621	-0,292261832580508	-0.0879796	-18.3379	0.6729	0.172049	0.9999
BPGM	chr7:134646852-134679816	TKS4_WT	TKS4_KO	8103.93	9760.6	1.20443	0,268345101251397	0.0807799	20.4425	0.66335	0.178257	0.9999	+	ENSG00000172331.12
BPHL	chr6:3063966-3153599	TKS4_WT	TKS4_KO	13693.9	17659.9	1.28962	0,366941425443693	0.11046	28.9616	0.76355	0.117163	0.9999	+	ENSG00000137274.13
BPNT1	chr1:220057481-220089916	TKS4_WT	TKS4_KO	42645	38446.5	0.901548	-0,149523962734076	-0.0450112	-9.84521	0.81055	0.0912202	0.9999	-	ENSG00000162813.18
BPNT2	chr8:56957930-56993874	TKS4_WT	TKS4_KO	137873	144999	1.05169	0,0727029410748017	0.0218858	5.16852	0.8995	0.0459988	0.9999	-	ENSG00000104331.9
BPTF	chr17:67825502-67984378	TKS4_WT	TKS4_KO	206492	175812	0.851423	-0,232052222710258	-0.0698547	-14.8577	0.71775	0.144027	0.9999	+	ENSG00000171634.19
BRAF	chr7:140713327-140924929	TKS4_WT	TKS4_KO	77556.4	73014.5	0.941438	-0,0870627242581122	-0.0262085	-5.85625	0.8686	0.0611802	0.9999	-	ENSG00000157764.14
BRAP	chr12:111642145-111686023	TKS4_WT	TKS4_KO	31116.2	30358	0.975633	-0,035589020785334	-0.0107134	-2.43667	0.94625	0.0239941	0.9999	-	ENSG00000089234.16
BRAT1	chr7:2537809-2555753	TKS4_WT	TKS4_KO	51726.7	68101.9	1.31657	0,396785223351171	0.119444	31.6571	0.47185	0.326196	0.9999	-	ENSG00000106009.16
BRCA1	chr17:43044294-43125364	TKS4_WT	TKS4_KO	84325.6	60840.6	0.721497	-0,470935637293892	-0.141766	-27.8503	0.4059	0.391581	0.9999	-	ENSG00000012048.23
BRCA2	chr13:32315507-32400268	TKS4_WT	TKS4_KO	89250.2	50600.2	0.566948	-0,818711080106543	-0.246457	-43.3052	0.1867	0.728856	0.9999	+	ENSG00000139618.17
BRCC3	chrX:155071402-155126766	TKS4_WT	TKS4_KO	31767.1	25994.2	0.818275	-0,289342629307841	-0.0871008	-18.1725	0.55655	0.254496	0.9999	+	ENSG00000185515.16
BRD1	chr22:49773277-49827873	TKS4_WT	TKS4_KO	39082.5	39761.5	1.01737	0,0248493649753666	0.0074804	1.73735	0.97245	0.0121327	0.9999	-	ENSG00000100425.19
BRD2	chr6:32968593-32981505	TKS4_WT	TKS4_KO	203445	205085	1.00806	0,0115831464940207	0.00348687	0.806114	0.99095	0.00394826	0.9999	+	ENSG00000204256.14
BRD3	chr9:134025475-134068533	TKS4_WT	TKS4_KO	35636.5	41095.9	1.1532	0,205638279343015	0.0619033	15.3196	0.81435	0.0891889	0.9999	-	ENSG00000169925.17
BRD3OS	chr9:134025475-134068533	TKS4_WT	TKS4_KO	23137.8	22432.2	0.969505	-0,0446803825460063	-0.0134501	-3.04954	0.96645	0.0148206	0.9999	+	ENSG00000235106.10
BRD4	chr19:15235518-15332539	TKS4_WT	TKS4_KO	46758.1	38454	0.822403	-0,282081965635108	-0.0849151	-17.7597	0.638	0.195179	0.9999	-	ENSG00000141867.19
BRD7	chr16:50246137-50368988	TKS4_WT	TKS4_KO	68947.1	49464.9	0.717433	-0,479083886966452	-0.144219	-28.2567	0.6099	0.214741	0.9999	-	ENSG00000166164.16
BRD8	chr5:138139769-138178630	TKS4_WT	TKS4_KO	44452.4	29164.7	0.656089	-0,608036377440253	-0.183037	-34.3911	0.27925	0.554007	0.9999	-	ENSG00000112983.18
BRD9	chr5:863734-892803	TKS4_WT	TKS4_KO	31136.1	34064.5	1.09405	0,12968038391353	0.0390377	9.40513	0.8124	0.0902301	0.9999	-	ENSG00000028310.18
BRDT	chr1:91949370-92014428	TKS4_WT	TKS4_KO	32.188	0	0.00309713	-8,33485426933163	-2.50904	-99.6903	1	0	1	+	ENSG00000137948.19
BRF1	chr14:105209285-105398147	TKS4_WT	TKS4_KO	25155.2	28245.1	1.12283	0,167143321029214	0.0503152	12.2833	0.8484	0.0713993	0.9999	-	ENSG00000185024.18
BRF2	chr8:37796882-37849861	TKS4_WT	TKS4_KO	13919.2	12995.8	0.93366	-0,0990301123753888	-0.029811	-6.63395	0.91945	0.0364719	0.9999	-	ENSG00000104221.13
BRI3	chr7:98281672-98401090	TKS4_WT	TKS4_KO	20008	29462.6	1.47254	0,55830547367034	0.168067	47.2539	0.67695	0.169443	0.9999	+	ENSG00000164713.10
BRI3BP	chr12:124993644-125051845	TKS4_WT	TKS4_KO	146629	134111	0.914628	-0,128742799023843	-0.0387554	-8.53719	0.79575	0.0992234	0.9999	+	ENSG00000184992.13
BRICD5	chr16:2204627-2210863	TKS4_WT	TKS4_KO	1046.54	767.832	0.733712	-0,446714829585722	-0.134475	-26.6288	0.82925	0.0813145	0.9999	-	ENSG00000182685.8
BRIP1	chr17:61679138-61864120	TKS4_WT	TKS4_KO	82717.8	49272.9	0.595675	-0,747402246505367	-0.22499	-40.4325	0.2338	0.631155	0.9999	-	ENSG00000136492.10
BRIX1	chr5:34837713-34925996	TKS4_WT	TKS4_KO	109052	72612.3	0.665851	-0,586729708993104	-0.176623	-33.4149	0.4849	0.314348	0.9999
BRK1	chr3:10115674-10127190	TKS4_WT	TKS4_KO	46671.7	50666.9	1.0856	0,118495300155308	0.0356706	8.5602	0.81715	0.0876982	0.9999	+	ENSG00000254999.4
BRME1	chr19:13882347-13930879	TKS4_WT	TKS4_KO	873.014	1142.9	1.30911	0,388583463717701	0.116975	30.9107	0.70235	0.153446	0.9999	-	ENSG00000132016.12
BRMS1	chr11:66337332-66345125	TKS4_WT	TKS4_KO	54415.9	44923.4	0.825557	-0,276560578345596	-0.083253	-17.4443	0.65635	0.182865	0.9999	-	ENSG00000174744.14
BRMS1L	chr14:35825595-35871963	TKS4_WT	TKS4_KO	8946.3	8221.54	0.918989	-0,121881061557026	-0.0366899	-8.10114	0.83865	0.0764192	0.9999	+	ENSG00000100916.14
BROX	chr1:222668012-222735196	TKS4_WT	TKS4_KO	67706.8	53197.7	0.785707	-0,347936281955531	-0.104739	-21.4293	0.66495	0.177211	0.9999	+	ENSG00000162819.12
BRPF1	chr3:9731728-9748016	TKS4_WT	TKS4_KO	35648.5	34172	0.958582	-0,0610265105748879	-0.0183708	-4.14182	0.92235	0.0351042	0.9999	+	ENSG00000156983.17
BRPF3	chr6:36196743-36232790	TKS4_WT	TKS4_KO	31216.8	30759.3	0.985344	-0,0212999153026859	-0.00641191	-1.46555	0.97065	0.0129373	0.9999	+	ENSG00000096070.19
BRSK1	chr19:55283996-55334043	TKS4_WT	TKS4_KO	12801.8	15471.5	1.20854	0,273264456850024	0.0822608	20.8539	0.7372	0.132415	0.9999	+	ENSG00000160469.17
BRSK2	chr11:1389933-1469066	TKS4_WT	TKS4_KO	12729.3	15600.4	1.22555	0,293427849130602	0.0883306	22.5549	0.6363	0.196338	0.9999	+	ENSG00000174672.16
BRWD1	chr21:39184175-39323218	TKS4_WT	TKS4_KO	190576	173987	0.912953	-0,131386859648971	-0.0395514	-8.70466	0.80595	0.0936919	0.9999	-	ENSG00000185658.14
BRWD3	chrX:80669502-80809877	TKS4_WT	TKS4_KO	42236	43405.3	1.02768	0,0393979121685187	0.01186	2.76848	0.9391	0.0272882	0.9999	-	ENSG00000165288.11
BSCL2	chr11:62690261-62727457	TKS4_WT	TKS4_KO	127826	121027	0.946811	-0,0788523137873797	-0.0237369	-5.31895	0.89095	0.0501467	0.9999
BSDC1	chr1:32352719-32394441	TKS4_WT	TKS4_KO	47388.8	49405.2	1.04255	0,0601166433262344	0.0180969	4.255	0.9151	0.0385314	0.9999	-	ENSG00000160058.19
BSG	chr19:567432-583493	TKS4_WT	TKS4_KO	357129	346652	0.970663	-0,0429571937107269	-0.0129314	-2.93367	0.94455	0.024775	0.9999	+	ENSG00000172270.22
BSN	chr3:49554476-49671549	TKS4_WT	TKS4_KO	4945.22	5056	1.0224	0,0319611201491061	0.00962126	2.2401	0.9668	0.0146634	0.9999	+	ENSG00000164061.5
BSND	chr1:54998932-55017172	TKS4_WT	TKS4_KO	64.376	22.1427	0.344976	-1,53543031911863	-0.462211	-65.5024	1	0	1	+	ENSG00000162399.9
BSPRY	chr9:113349540-113371233	TKS4_WT	TKS4_KO	14843.8	14770.7	0.995075	-0,00712222117229593	-0.002144	-0.492458	0.99025	0.00425515	0.9999	+	ENSG00000119411.11
BST1	chr4:15701865-15774178	TKS4_WT	TKS4_KO	440.445	278.068	0.631418	-0,663332928391434	-0.199683	-36.8582	0.4334	0.363111	0.9999	+	ENSG00000109743.11
BST2	chr19:17402938-17405630	TKS4_WT	TKS4_KO	238.671	3495.22	14.6388	3,87172501238662	1.16551	1363.88	0.00805	2.0942	0.868112	-	ENSG00000130303.14
BTAF1	chr10:91923769-92031437	TKS4_WT	TKS4_KO	174261	157488	0.903748	-0,146007734248508	-0.0439527	-9.62521	0.83805	0.0767301	0.9999	+	ENSG00000095564.15
BTBD1	chr15:83016422-83067258	TKS4_WT	TKS4_KO	189856	165956	0.874115	-0,194104693800111	-0.0584313	-12.5885	0.7457	0.127436	0.9999	-	ENSG00000064726.10
BTBD10	chr11:13387995-13463292	TKS4_WT	TKS4_KO	29991.4	32379.8	1.07964	0,110544850913689	0.0332773	7.96359	0.8464	0.0724243	0.9999	-	ENSG00000148925.11
BTBD11	chr12:107316748-107659642	TKS4_WT	TKS4_KO	7905.92	13568.9	1.71629	0,779290891916925	0.23459	71.6287	0.186	0.730487	0.9999	+	ENSG00000151136.15
BTBD16	chr10:122270744-122338170	TKS4_WT	TKS4_KO	642.99	424.419	0.660124	-0,599191530598086	-0.180375	-33.9876	0.49525	0.305176	0.9999	+	ENSG00000138152.10
BTBD17	chr17:74356415-74363655	TKS4_WT	TKS4_KO	87.1474	45.4787	0.522408	-0,936752362690887	-0.281991	-47.7592	0.5554	0.255394	0.9999	-	ENSG00000204347.4
BTBD18	chr11:57712522-57819540	TKS4_WT	TKS4_KO	128.752	249.536	1.93739	0,954111069783718	0.287216	93.7386	1	0	1	-	ENSG00000233436.8
BTBD19	chr1:44807441-44815585	TKS4_WT	TKS4_KO	7630.18	12652.6	1.65822	0,729637374928943	0.219643	65.8222	0.37175	0.429749	0.9999	+	ENSG00000222009.9
BTBD2	chr19:1985437-2015714	TKS4_WT	TKS4_KO	48780.8	76583.9	1.56996	0,650726638572788	0.195888	56.9959	0.26565	0.57569	0.9999	-	ENSG00000133243.10
BTBD3	chr20:11890722-11926595	TKS4_WT	TKS4_KO	37835.1	35693.2	0.943389	-0,0840757804046523	-0.0253093	-5.66113	0.8769	0.0570499	0.9999	+	ENSG00000132640.15
BTBD6	chr14:105209285-105398147	TKS4_WT	TKS4_KO	37886.2	36191.7	0.955274	-0,0660133902510609	-0.019872	-4.47259	0.96415	0.0158554	0.9999	+	ENSG00000184887.14
BTBD7	chr14:93237549-93333036	TKS4_WT	TKS4_KO	72939.2	72055.4	0.987883	-0,0175877985764778	-0.00529445	-1.21169	0.9727	0.0120211	0.9999	-	ENSG00000011114.15
BTBD8	chr1:92080344-92188509	TKS4_WT	TKS4_KO	6945.76	7505.94	1.08065	0,111898646218922	0.0336848	8.06495	0.85945	0.0657794	0.9999	+	ENSG00000189195.15
BTBD9	chr6:38168450-38664212	TKS4_WT	TKS4_KO	20546.1	25671.6	1.24946	0,321307241954545	0.0967231	24.9462	0.54235	0.26572	0.9999	-	ENSG00000183826.18
BTC	chr4:74744758-74794718	TKS4_WT	TKS4_KO	3400.29	5507.94	1.61983	0,695838814042755	0.209468	61.9826	0.31705	0.498872	0.9999	-	ENSG00000174808.12
BTD	chr3:15560698-15859814	TKS4_WT	TKS4_KO	8835.52	12991.1	1.47032	0,556131420904377	0.167412	47.0321	0.54155	0.266361	0.9999	+	ENSG00000169814.16
BTF3	chr5:73498441-73505667	TKS4_WT	TKS4_KO	408094	352540	0.86387	-0,211114485527656	-0.0635518	-13.613	0.74025	0.130622	0.9999	+	ENSG00000145741.17
BTF3L4	chr1:52056294-52090716	TKS4_WT	TKS4_KO	73579.2	65078.8	0.884473	-0,177110085254321	-0.0533154	-11.5527	0.75955	0.119444	0.9999	+	ENSG00000134717.18
BTG2	chr1:203305518-203309602	TKS4_WT	TKS4_KO	33144	50479.7	1.52304	0,606954116169417	0.182711	52.304	0.3633	0.439735	0.9999	+	ENSG00000159388.6
BTG3	chr21:17512905-17636213	TKS4_WT	TKS4_KO	50975	51325.9	1.00688	0,00989713063179215	0.00297933	0.688375	0.9892	0.00471589	0.9999	-	ENSG00000154640.15
BTK	chrX:101349446-101390796	TKS4_WT	TKS4_KO	339.943	70.0079	0.206174	-2,27806826695443	-0.685767	-79.3826	1	0	1	-	ENSG00000010671.18
BTLA	chr3:112463029-112499757	TKS4_WT	TKS4_KO	417.674	297.714	0.712859	-0,488311134178246	-0.146996	-28.7141	0.6064	0.217241	0.9999	-	ENSG00000186265.10
BTN1A1	chr6:26486648-26527393	TKS4_WT	TKS4_KO	362.714	482.896	1.33125	0,412781114630023	0.124259	33.125	0.61505	0.21109	0.9999	+	ENSG00000124557.14
BTN2A1	chr6:26457954-26482509	TKS4_WT	TKS4_KO	10809.3	11684.7	1.08099	0,112346595528108	0.0338197	8.09851	0.85225	0.069433	0.9999	+	ENSG00000112763.17
BTN2A2	chr6:26382892-26394874	TKS4_WT	TKS4_KO	8753.68	9227.84	1.05417	0,0761024970379058	0.0229091	5.41663	0.9014	0.0450824	0.9999	+	ENSG00000124508.17
BTN3A1	chr6:26402268-26415216	TKS4_WT	TKS4_KO	4646.97	7228.14	1.55544	0,637323032254896	0.191853	55.544	0.35885	0.445087	0.9999	+	ENSG00000026950.17
BTN3A2	chr6:26365169-26378320	TKS4_WT	TKS4_KO	10901	13992.1	1.28356	0,360149095204037	0.108416	28.3559	0.54765	0.261497	0.9999	+	ENSG00000186470.14
BTN3A3	chr6:26440503-26453415	TKS4_WT	TKS4_KO	1556.84	3478.98	2.23456	1,15999250535154	0.349193	123.456	0.11675	0.932743	0.9999	+	ENSG00000111801.16
BTNL9	chr5:181039871-181061525	TKS4_WT	TKS4_KO	6772.15	7317.01	1.08045	0,111638715611128	0.0336066	8.04548	0.87685	0.0570747	0.9999	+	ENSG00000165810.17
BTRC	chr10:101353807-101557321	TKS4_WT	TKS4_KO	53989.3	51909.4	0.961476	-0,0566775922399825	-0.0170617	-3.85242	0.91435	0.0388875	0.9999	+	ENSG00000166167.18
BUB1	chr2:110637527-110678063	TKS4_WT	TKS4_KO	178068	127317	0.714991	-0,484002886982399	-0.145699	-28.5009	0.45745	0.339656	0.9999	-	ENSG00000169679.15
BUB1B	chr15:40161068-40277487	TKS4_WT	TKS4_KO	152248	116449	0.764864	-0,386724734506546	-0.116416	-23.5136	0.51275	0.290094	0.9999
BUB3	chr10:123154243-123170467	TKS4_WT	TKS4_KO	345277	294204	0.852081	-0,230937300728144	-0.0695191	-14.7919	0.74575	0.127407	0.9999	+	ENSG00000154473.18
BUD13	chr11:116748169-116772987	TKS4_WT	TKS4_KO	27427.9	20003.8	0.729324	-0,455368129209116	-0.137079	-27.0676	0.45675	0.340321	0.9999	-	ENSG00000137656.12
BUD23	chr7:73683570-73698212	TKS4_WT	TKS4_KO	55153	76380.1	1.38488	0,46975671972322	0.141411	38.4876	0.38115	0.418904	0.9999	+	ENSG00000071462.12
BUD31	chr7:99408640-99466167	TKS4_WT	TKS4_KO	59518.1	49047.6	0.824079	-0,279145410346208	-0.0840311	-17.5921	0.8291	0.0813931	0.9999
BVES	chr6:105096821-105137157	TKS4_WT	TKS4_KO	5279.01	5082.31	0.96274	-0,0547819646772189	-0.016491	-3.72601	0.9329	0.0301649	0.9999	-	ENSG00000112276.14
BYSL	chr6:41921498-41933046	TKS4_WT	TKS4_KO	45294.5	46168.9	1.0193	0,0275854214648098	0.00830404	1.93047	0.95715	0.01902	0.9999	+	ENSG00000112578.10
BZW1	chr2:200695722-200827338	TKS4_WT	TKS4_KO	743619	617819	0.830827	-0,267379353775373	-0.0804892	-16.9173	0.7213	0.141884	0.9999	+	ENSG00000082153.18
BZW2	chr7:16646180-16706523	TKS4_WT	TKS4_KO	231798	182150	0.785814	-0,347740953809449	-0.10468	-21.4186	0.6784	0.168514	0.9999	+	ENSG00000136261.16
C10orf143	chr10:130034489-130110848	TKS4_WT	TKS4_KO	32.188	92.1506	2.85712	1,51456021496799	0.455928	185.712	1	0	1	-	ENSG00000237489.5
C10orf62	chr10:97584388-97612802	TKS4_WT	TKS4_KO	128.752	22.1427	0.172622	-2,53431110055473	-0.762904	-82.7378	1	0	1	+	ENSG00000203942.5
C10orf88	chr10:122930900-122954353	TKS4_WT	TKS4_KO	29214.1	23899.7	0.818088	-0,289671237750825	-0.0871997	-18.1912	0.6248	0.204259	0.9999	-	ENSG00000119965.13
C10orf95	chr10:102449816-102456293	TKS4_WT	TKS4_KO	1399.84	1456.95	1.04079	0,05768538959056	0.017365	4.07946	0.87355	0.0587122	0.9999	-	ENSG00000120055.7
C11orf1	chr11:111879477-111885975	TKS4_WT	TKS4_KO	17696.7	12429.2	0.702347	-0,509743462302548	-0.153448	-29.7653	0.49055	0.309317	0.9999	+	ENSG00000137720.8
C11orf21	chr11:2295627-2318204	TKS4_WT	TKS4_KO	27.4797	0	0.00362586	-8,10746295370181	-2.44059	-99.6374	1	0	1	-	ENSG00000110665.12
C11orf24	chr11:68261337-68271973	TKS4_WT	TKS4_KO	26960.7	21878	0.811478	-0,301375852869708	-0.0907232	-18.8522	0.62225	0.206035	0.9999	-	ENSG00000171067.11
C11orf42	chr11:6201904-6234663	TKS4_WT	TKS4_KO	96.564	67.6214	0.700586	-0,513366897093065	-0.154539	-29.9414	1	0	1	+	ENSG00000180878.3
C11orf45	chr11:128891355-128921163	TKS4_WT	TKS4_KO	2828.69	2175.99	0.769265	-0,378446854162569	-0.113924	-23.0735	0.6465	0.189431	0.9999	-	ENSG00000174370.12
C11orf49	chr11:46936523-47176880	TKS4_WT	TKS4_KO	11792.8	14104.5	1.19602	0,258247216275002	0.0777402	19.6025	0.802	0.0958256	0.9999	+	ENSG00000149179.14
C11orf54	chr11:93741671-93764749	TKS4_WT	TKS4_KO	27598.7	30081.1	1.08995	0,12425658042254	0.037405	8.99459	0.82505	0.0835197	0.9999	+	ENSG00000182919.15
C11orf58	chr11:16738646-16758340	TKS4_WT	TKS4_KO	123500	96930.5	0.784863	-0,349488123242751	-0.105206	-21.5137	0.52015	0.283871	0.9999	+	ENSG00000110696.10
C11orf65	chr11:108155279-108469832	TKS4_WT	TKS4_KO	624.156	878.436	1.40733	0,492963622538795	0.148397	40.7333	0.68255	0.165866	0.9999	-	ENSG00000166323.13
C11orf68	chr11:65916809-65919062	TKS4_WT	TKS4_KO	29520.8	38597.5	1.30747	0,386774438125804	0.116431	30.7467	0.488	0.31158	0.9999	-	ENSG00000175573.7
C11orf71	chr11:114391442-114400511	TKS4_WT	TKS4_KO	3111.37	2835.88	0.91146	-0,133748977807266	-0.0402625	-8.85401	0.8581	0.0664621	0.9999	-	ENSG00000180425.11
C11orf86	chr11:66975303-66977009	TKS4_WT	TKS4_KO	119.335	115.487	0.967782	-0,0472465272647139	-0.0142226	-3.22184	0.90565	0.0430396	0.9999	+	ENSG00000173237.5
C11orf87	chr11:109422189-109433003	TKS4_WT	TKS4_KO	142.107	46.6719	0.3289	-1,60427854075147	-0.482936	-67.11	0.3716	0.429924	0.9999	+	ENSG00000185742.7
C11orf96	chr11:43942636-43943878	TKS4_WT	TKS4_KO	54.9594	44.2855	0.806138	-0,310900439289227	-0.0935904	-19.3862	1	0	1	+	ENSG00000187479.8
C12orf29	chr12:88035535-88142216	TKS4_WT	TKS4_KO	47394.6	30185	0.636888	-0,650889155449244	-0.195937	-36.3112	0.4083	0.389021	0.9999	+	ENSG00000133641.18
C12orf4	chr12:4487729-4538508	TKS4_WT	TKS4_KO	34478.7	20576.2	0.596781	-0,744725981495589	-0.224185	-40.3219	0.26365	0.578972	0.9999	-	ENSG00000047621.12
C12orf43	chr12:120977682-121016487	TKS4_WT	TKS4_KO	17561.3	14762.3	0.840616	-0,250480574645148	-0.0754022	-15.9384	0.67175	0.172792	0.9999	-	ENSG00000157895.11
C12orf56	chr12:64264761-64390758	TKS4_WT	TKS4_KO	59.6677	0	0.00167314	-9,22322221534836	-2.77647	-99.8327	1	0	1	-	ENSG00000185306.13
C12orf57	chr12:6943432-6946003	TKS4_WT	TKS4_KO	77454.5	69447.1	0.896618	-0,15743439445998	-0.0473925	-10.3382	0.8005	0.0966387	0.9999	+	ENSG00000111678.11
C12orf60	chr12:14503660-14824415	TKS4_WT	TKS4_KO	3466.29	3140.35	0.905971	-0,142462679814207	-0.0428855	-9.40287	0.88605	0.0525418	0.9999
C12orf73	chr12:103950193-103965755	TKS4_WT	TKS4_KO	8882.78	8056.05	0.90693	-0,140936956221102	-0.0424263	-9.307	0.84435	0.0734775	0.9999	-	ENSG00000204954.10
C12orf75	chr12:105330690-105371518	TKS4_WT	TKS4_KO	58924.3	52347.7	0.888389	-0,170736256387611	-0.0513967	-11.1611	0.75225	0.123638	0.9999	+	ENSG00000235162.9
C12orf76	chr12:110041176-110073639	TKS4_WT	TKS4_KO	1991.03	4262.95	2.14102	1,09829855926999	0.330621	114.102	0.1478	0.830326	0.9999	-	ENSG00000174456.16
C13orf46	chr13:113953704-113975026	TKS4_WT	TKS4_KO	1185.48	1909.52	1.61071	0,687692565781705	0.207016	61.0705	0.41745	0.379396	0.9999	-	ENSG00000283199.3
C14orf119	chr14:23057659-23104989	TKS4_WT	TKS4_KO	57875.9	51247.1	0.885465	-0,17549203388073	-0.0528284	-11.4535	0.89865	0.0464094	0.9999	+	ENSG00000179933.6
C14orf132	chr14:96039361-96093971	TKS4_WT	TKS4_KO	5646.34	6610.7	1.17079	0,227483313260484	0.0684793	17.0791	0.7486	0.12575	0.9999	+	ENSG00000227051.7
C14orf28	chr14:44897274-44911917	TKS4_WT	TKS4_KO	2560.23	2800.02	1.09366	0,129158884985405	0.0388807	9.36559	0.8543	0.0683896	0.9999	+	ENSG00000179476.8
C14orf93	chr14:22982693-23010144	TKS4_WT	TKS4_KO	10548.6	8755.11	0.82998	-0,268851526866886	-0.0809324	-17.002	0.67085	0.173375	0.9999	-	ENSG00000100802.15
C15orf39	chr15:75201881-75212169	TKS4_WT	TKS4_KO	31604.4	35253.4	1.11546	0,157636505862477	0.0474533	11.5458	0.7975	0.0982693	0.9999	+	ENSG00000167173.19
C15orf40	chr15:82986209-83012298	TKS4_WT	TKS4_KO	18165.7	14638.8	0.805849	-0,311417751376351	-0.0937461	-19.4151	0.7094	0.149109	0.9999	-	ENSG00000169609.14
C15orf61	chr15:67200666-67530146	TKS4_WT	TKS4_KO	9353.87	9822.75	1.05013	0,0705628668043385	0.0212415	5.01263	0.9123	0.0398623	0.9999	+	ENSG00000189227.6
C15orf62	chr15:40764067-40815084	TKS4_WT	TKS4_KO	386.256	296.208	0.76693	-0,382833224722893	-0.115244	-23.307	1	0	1	+	ENSG00000188277.10
C15orf65	chr15:55317183-55508234	TKS4_WT	TKS4_KO	600.615	375.361	0.625024	-0,678017629300295	-0.204104	-37.4976	0.74585	0.127349	0.9999	+	ENSG00000261652.3
C16orf46	chr16:81053496-81077254	TKS4_WT	TKS4_KO	4405.9	3981.11	0.903588	-0,146262522637905	-0.0440294	-9.64117	0.8476	0.0718091	0.9999	-	ENSG00000166455.14
C16orf72	chr16:9091376-9121635	TKS4_WT	TKS4_KO	143674	172527	1.20082	0,264022981666515	0.0794788	20.0823	0.6371	0.195792	0.9999	+	ENSG00000182831.12
C16orf74	chr16:85707516-85751096	TKS4_WT	TKS4_KO	8072.34	7574.79	0.938364	-0,0917798743576282	-0.0276285	-6.16356	0.8742	0.0583892	0.9999	-	ENSG00000154102.11
C16orf86	chr16:67662944-67670523	TKS4_WT	TKS4_KO	96.564	235.931	2.44177	1,28792575320757	0.387704	144.177	0.4555	0.341512	0.9999	+	ENSG00000159761.15
C16orf87	chr16:46796602-46831471	TKS4_WT	TKS4_KO	11694.9	11892.7	1.01691	0,0241965565512377	0.00728389	1.69132	0.96685	0.0146409	0.9999	-	ENSG00000155330.10
C16orf91	chr16:1419751-1420747	TKS4_WT	TKS4_KO	10799.2	12318.9	1.14072	0,189947348063493	0.0571798	14.0722	0.7399	0.130827	0.9999	-	ENSG00000174109.5
C16orf95	chr16:87302797-87317392	TKS4_WT	TKS4_KO	3083.89	3716.56	1.20515	0,269208629269791	0.0810399	20.5147	0.68775	0.162569	0.9999	-	ENSG00000260456.7
C16orf96	chr16:4510668-4600758	TKS4_WT	TKS4_KO	64.376	45.4787	0.70691	-0,500402467373454	-0.150636	-29.309	1	0	1	+	ENSG00000205832.8
C17orf100	chr17:6651761-6653476	TKS4_WT	TKS4_KO	651.636	537.335	0.824621	-0,278197408725573	-0.0837458	-17.5379	0.78285	0.106321	0.9999	+	ENSG00000256806.6
C17orf107	chr17:4833339-4905019	TKS4_WT	TKS4_KO	1815.88	2273.3	1.25189	0,324103231850985	0.0975648	25.1886	0.8676	0.0616805	0.9999	+	ENSG00000205710.4
C17orf113	chr17:41966794-42098473	TKS4_WT	TKS4_KO	1877.95	3068.92	1.63415	0,708542574609502	0.213293	63.4152	0.7231	0.140802	0.9999	-	ENSG00000267221.3
C17orf49	chr17:7012416-7019654	TKS4_WT	TKS4_KO	28958.8	26041.2	0.89925	-0,153205332229144	-0.0461194	-10.075	0.80915	0.091971	0.9999
C17orf58	chr17:67991098-67996469	TKS4_WT	TKS4_KO	28940.1	24610.2	0.850385	-0,233812647702478	-0.0703846	-14.9615	0.69245	0.159612	0.9999	-	ENSG00000186665.10
C17orf67	chr17:56791912-56833920	TKS4_WT	TKS4_KO	665.761	670.742	1.00748	0,0107519729659822	0.00323667	0.748054	0.99035	0.00421129	0.9999	-	ENSG00000214226.9
C17orf75	chr17:32328440-32350049	TKS4_WT	TKS4_KO	10171.1	11916.2	1.17157	0,228446451213767	0.0687692	17.1573	0.68395	0.164976	0.9999	-	ENSG00000108666.10
C17orf80	chr17:73232432-73263778	TKS4_WT	TKS4_KO	52388.2	41022.8	0.783055	-0,352815164579164	-0.106208	-21.6945	0.5552	0.255551	0.9999	+	ENSG00000141219.16
C17orf97	chr17:404534-414666	TKS4_WT	TKS4_KO	1045.77	1425.04	1.36264	0,446400112776532	0.13438	36.2636	0.56025	0.251618	0.9999	+	ENSG00000187624.9
C17orf98	chr17:38835085-38841438	TKS4_WT	TKS4_KO	82.439	0	0.00121155	-9,68893214927571	-2.91666	-99.8788	1	0	1	-	ENSG00000275489.2
C18orf21	chr18:35951835-35979287	TKS4_WT	TKS4_KO	24250.9	16107.1	0.664187	-0,590338514142247	-0.17771	-33.5813	0.3921	0.406603	0.9999	+	ENSG00000141428.17
C18orf25	chr18:46173552-46266992	TKS4_WT	TKS4_KO	82768.6	71653.8	0.865713	-0,208040067951799	-0.0626263	-13.4287	0.71985	0.142758	0.9999	+	ENSG00000152242.11
C18orf54	chr18:54357905-54382035	TKS4_WT	TKS4_KO	31325.9	20882.1	0.666609	-0,585086852521187	-0.176129	-33.3391	0.33075	0.4805	0.9999	+	ENSG00000166845.15
C19orf12	chr19:29698885-29715789	TKS4_WT	TKS4_KO	17320.2	22169.3	1.27997	0,356105806363791	0.107199	27.9966	0.59785	0.223408	0.9999	-	ENSG00000131943.20
C19orf25	chr19:1446267-1479215	TKS4_WT	TKS4_KO	40708.9	35813.5	0.879746	-0,184840236362158	-0.0556425	-12.0254	0.77365	0.111455	0.9999	-	ENSG00000119559.17
C19orf33	chr19:38303557-38315976	TKS4_WT	TKS4_KO	44824.4	35002.2	0.780874	-0,356837765860137	-0.107419	-21.9126	0.73385	0.134393	0.9999	+	ENSG00000167644.12
C19orf38	chr19:10836557-10869796	TKS4_WT	TKS4_KO	164.878	181.805	1.1026	0,140911546405475	0.0424186	10.2602	1	0	1	+	ENSG00000214212.9
C19orf44	chr19:16496381-16542437	TKS4_WT	TKS4_KO	7564.35	6804.02	0.899486	-0,152826604893268	-0.0460054	-10.0514	0.9001	0.0457092	0.9999	+	ENSG00000105072.9
C19orf47	chr19:40292742-40378490	TKS4_WT	TKS4_KO	22143.6	18225.2	0.823047	-0,280953740349511	-0.0845755	-17.6953	0.78	0.107905	0.9999	-	ENSG00000160392.14
C19orf53	chr19:13774455-13778773	TKS4_WT	TKS4_KO	37850.7	26385.5	0.697095	-0,520573002460519	-0.156708	-30.2905	0.4621	0.335264	0.9999	+	ENSG00000104979.9
C19orf54	chr19:40717111-40765389	TKS4_WT	TKS4_KO	8251.26	8224.32	0.996735	-0,00471798470721357	-0.00142025	-0.326492	0.9963	0.00160987	0.9999	-	ENSG00000188493.15
C19orf67	chr19:14080641-14086153	TKS4_WT	TKS4_KO	164.878	22.1427	0.134822	-2,89086982243438	-0.870239	-86.5178	1	0	1	-	ENSG00000188032.10
C19orf71	chr19:3506262-3557592	TKS4_WT	TKS4_KO	96.564	90.9574	0.941999	-0,0862024293028433	-0.0259495	-5.80009	1	0	1	+	ENSG00000183397.6
C19orf73	chr19:49114338-49119143	TKS4_WT	TKS4_KO	449.091	592.306	1.31883	0,399257230428018	0.120188	31.8829	0.8655	0.0627329	0.9999	-	ENSG00000221916.4
C19orf81	chr19:50649444-50719802	TKS4_WT	TKS4_KO	2191.27	2619.35	1.19535	0,257430828631298	0.0774944	19.5348	0.88545	0.052836	0.9999	+	ENSG00000235034.7
C19orf85	chr19:55463000-55464751	TKS4_WT	TKS4_KO	193.128	88.5709	0.458893	-1,12377154134805	-0.338289	-54.1107	1	0	1	-	ENSG00000283567.2
C1D	chr2:68041129-68063004	TKS4_WT	TKS4_KO	15452.5	12070.4	0.781131	-0,356364162807958	-0.107276	-21.8869	0.52965	0.276011	0.9999	-	ENSG00000197223.12
C1GALT1	chr7:7182543-7248616	TKS4_WT	TKS4_KO	60171.9	51200.7	0.850907	-0,232925957776758	-0.0701177	-14.9093	0.67355	0.17163	0.9999	+	ENSG00000106392.11
C1GALT1C1	chrX:120625673-120630054	TKS4_WT	TKS4_KO	23864.4	26749.7	1.1209	0,164661995063892	0.0495682	12.0903	0.77365	0.111455	0.9999	-	ENSG00000171155.8
C1GALT1C1L	chr2:43637259-43767987	TKS4_WT	TKS4_KO	600.615	631.837	1.05197	0,0731000495179343	0.0220053	5.19747	0.95855	0.0183852	0.9999	-	ENSG00000223658.8
C1orf109	chr1:37681569-37692336	TKS4_WT	TKS4_KO	48826.4	41060.8	0.840955	-0,249899116121087	-0.0752271	-15.9045	0.70905	0.149323	0.9999	-	ENSG00000116922.15
C1orf112	chr1:169792523-169894267	TKS4_WT	TKS4_KO	32338.9	25611	0.791957	-0,336505849684124	-0.101298	-20.8043	0.7323	0.135311	0.9999	+	ENSG00000000460.17
C1orf115	chr1:220690362-220699153	TKS4_WT	TKS4_KO	17982.6	21492.5	1.19518	0,257230369278628	0.0774341	19.5182	0.6495	0.187421	0.9999	+	ENSG00000162817.7
C1orf116	chr1:207018520-207032761	TKS4_WT	TKS4_KO	7995.47	5943.62	0.743377	-0,427834732132796	-0.128791	-25.6623	0.5361	0.270754	0.9999	-	ENSG00000182795.13
C1orf122	chr1:37802944-37809454	TKS4_WT	TKS4_KO	34824.6	23003	0.66054	-0,598282626407275	-0.180101	-33.946	0.62025	0.207433	0.9999	+	ENSG00000197982.14
C1orf131	chr1:231223764-231241175	TKS4_WT	TKS4_KO	22745	15055.9	0.661945	-0,595217244347246	-0.179178	-33.8055	0.4153	0.381638	0.9999	-	ENSG00000143633.13
C1orf159	chr1:1081822-1116089	TKS4_WT	TKS4_KO	12092.1	10469.7	0.865831	-0,207842862495481	-0.0625669	-13.4169	0.71605	0.145057	0.9999	-	ENSG00000131591.18
C1orf167	chr1:11761378-11806103	TKS4_WT	TKS4_KO	454.57	775.524	1.70591	0,770537629767206	0.231955	70.5905	0.5206	0.283496	0.9999	+	ENSG00000215910.8
C1orf174	chr1:3889132-3900293	TKS4_WT	TKS4_KO	26475.4	22335.9	0.843648	-0,245287083665395	-0.0738388	-15.6352	0.6619	0.179208	0.9999	-	ENSG00000198912.12
C1orf198	chr1:230837118-230869591	TKS4_WT	TKS4_KO	51145.4	47105.8	0.921017	-0,118699542788761	-0.0357321	-7.89825	0.8134	0.0896958	0.9999	-	ENSG00000119280.17
C1orf21	chr1:184387028-184638004	TKS4_WT	TKS4_KO	9583.72	10846.3	1.13174	0,178543563720532	0.053747	13.1741	0.7668	0.115318	0.9999	+	ENSG00000116667.15
C1orf210	chr1:43281876-43285840	TKS4_WT	TKS4_KO	2348.18	4920.92	2.09558	1,06735293968957	0.321305	109.558	0.16315	0.787413	0.9999	-	ENSG00000253313.6
C1orf216	chr1:35713876-35718884	TKS4_WT	TKS4_KO	17097.8	17830.2	1.04284	0,0605118357760903	0.0182159	4.28357	0.916	0.0381045	0.9999	-	ENSG00000142686.8
C1orf226	chr1:162378840-162386812	TKS4_WT	TKS4_KO	7850.11	15918.3	2.02777	1,01989218112814	0.307018	102.777	0.0889	1.0511	0.9999	+	ENSG00000239887.6
C1orf35	chr1:228100730-228103325	TKS4_WT	TKS4_KO	8709	8819.16	1.01265	0,0181339701082415	0.00545887	1.26488	0.97565	0.010706	0.9999	-	ENSG00000143793.13
C1orf43	chr1:154206719-154271510	TKS4_WT	TKS4_KO	100340	138742	1.38272	0,467507345466988	0.140734	38.2718	0.5397	0.267848	0.9999	-	ENSG00000143612.21
C1orf50	chr1:42767248-42784895	TKS4_WT	TKS4_KO	7545.61	9285.99	1.23064	0,299414608519003	0.0901328	23.0645	0.59975	0.22203	0.9999	+	ENSG00000164008.17
C1orf52	chr1:85249952-85259677	TKS4_WT	TKS4_KO	37802.3	31352.8	0.829389	-0,269878939324893	-0.0812417	-17.0611	0.65645	0.182798	0.9999	-	ENSG00000162642.14
C1orf53	chr1:197902629-197907362	TKS4_WT	TKS4_KO	1644.84	1963.43	1.19368	0,255414678635776	0.0768875	19.3679	0.7823	0.106627	0.9999	+	ENSG00000203724.11
C1orf54	chr1:150257257-150282179	TKS4_WT	TKS4_KO	298.338	254.732	0.853886	-0,227884792706345	-0.0686002	-14.6114	0.84205	0.0746621	0.9999	+	ENSG00000118292.9
C1orf74	chr1:209756052-209784559	TKS4_WT	TKS4_KO	16203.9	15435.1	0.952555	-0,0701258134917687	-0.02111	-4.74451	0.90055	0.0454922	0.9999	-	ENSG00000162757.4
C1orf87	chr1:59990393-60073770	TKS4_WT	TKS4_KO	27.4797	0	0.00362586	-8,10746295370181	-2.44059	-99.6374	1	0	1	-	ENSG00000162598.13
C1QBP	chr17:5420166-5439155	TKS4_WT	TKS4_KO	602344	527921	0.876444	-0,190265559280811	-0.0572756	-12.3556	0.8412	0.0751007	0.9999	-	ENSG00000108561.8
C1QL1	chr17:44959692-44968303	TKS4_WT	TKS4_KO	2721.08	4533.4	1.66601	0,73639289411599	0.221676	66.6005	0.33395	0.476319	0.9999	-	ENSG00000131094.4
C1QL3	chr10:16436942-16521879	TKS4_WT	TKS4_KO	124.044	201.138	1.621	0,696888220262092	0.209784	62.1005	0.73245	0.135222	0.9999	-	ENSG00000165985.10
C1QL4	chr12:49332408-49337195	TKS4_WT	TKS4_KO	8588.21	10318.9	1.20152	0,264856995798277	0.0797299	20.1517	0.6529	0.185153	0.9999	-	ENSG00000186897.5
C1QTNF1	chr17:79019208-79049788	TKS4_WT	TKS4_KO	2345.1	2925.71	1.24757	0,319125123091476	0.0960662	24.7574	0.6506	0.186686	0.9999	+	ENSG00000173918.15
C1QTNF12	chr1:1242447-1247218	TKS4_WT	TKS4_KO	160.94	348.793	2.1665	1,11536557499962	0.335758	116.65	0.47555	0.322804	0.9999	-	ENSG00000184163.3
C1QTNF2	chr5:160347557-160370656	TKS4_WT	TKS4_KO	293.63	76.1589	0.259622	-1,9455129961823	-0.585658	-74.0378	0.304	0.517126	0.9999	-	ENSG00000145861.9
C1QTNF4	chr11:47589663-47596336	TKS4_WT	TKS4_KO	225.316	472.157	2.09505	1,06698225956821	0.321194	109.505	1	0	1	-	ENSG00000172247.4
C1QTNF6	chr22:37180165-37199423	TKS4_WT	TKS4_KO	8441.99	15696	1.85927	0,894734023252276	0.269342	85.9267	0.1918	0.717151	0.9999	-	ENSG00000133466.14
C1QTNF8	chr16:1088225-1096306	TKS4_WT	TKS4_KO	982.162	1485.25	1.51217	0,59662312721927	0.179601	51.2173	0.45635	0.340702	0.9999	-	ENSG00000184471.9
C1QTNF9	chr13:24307165-24322531	TKS4_WT	TKS4_KO	32.188	67.6214	2.09742	1,0686137187236	0.321685	109.742	1	0	1	+	ENSG00000240654.6
C1R	chr12:7080218-7092445	TKS4_WT	TKS4_KO	1377.84	1960.91	1.42315	0,509083822682496	0.15325	42.3146	0.4798	0.31894	0.9999	-	ENSG00000159403.18
C1RL	chr12:7094553-7130272	TKS4_WT	TKS4_KO	9673.87	15417.3	1.5937	0,672379519815449	0.202406	59.3699	0.3619	0.441411	0.9999	-	ENSG00000139178.12
C1S	chr12:7060717-7071032	TKS4_WT	TKS4_KO	638.281	752.188	1.17843	0,236867364064059	0.0713042	17.8431	0.8354	0.0781055	0.9999	+	ENSG00000182326.16
C2	chr6:31897782-31945672	TKS4_WT	TKS4_KO	179.003	710.289	3.96637	1,98781973961956	0.598393	296.637	0.2125	0.672641	0.9999	+	ENSG00000166278.16
C20orf144	chr20:33657086-33674428	TKS4_WT	TKS4_KO	59.6677	22.1427	0.372153	-1,42603410081345	-0.429279	-62.7847	0.55745	0.253794	0.9999	+	ENSG00000149609.6
C20orf202	chr20:1203453-1208279	TKS4_WT	TKS4_KO	160.94	287.138	1.78364	0,834827544996048	0.251308	78.3644	0.4852	0.314079	0.9999	+	ENSG00000215595.3
C20orf203	chr20:32631624-32673941	TKS4_WT	TKS4_KO	96.564	45.4787	0.471517	-1,0846189188682	-0.326503	-52.8483	1	0	1	-	ENSG00000198547.10
C20orf204	chr20:64033708-64039001	TKS4_WT	TKS4_KO	942.098	1116.39	1.18498	0,244868154798226	0.0737127	18.4984	0.79175	0.101412	0.9999	+	ENSG00000196421.9
C20orf27	chr20:3753498-3768388	TKS4_WT	TKS4_KO	60210.8	63265.9	1.05074	0,0714057019703489	0.0214953	5.074	0.8779	0.056555	0.9999	-	ENSG00000101220.18
C20orf96	chr20:270862-290757	TKS4_WT	TKS4_KO	4654.08	4881.63	1.04889	0,0688654964454361	0.0207306	4.88915	0.91335	0.0393628	0.9999	-	ENSG00000196476.12
C21orf58	chr21:46229230-46324046	TKS4_WT	TKS4_KO	9845.85	10731.5	1.08995	0,12426286863008	0.0374069	8.99507	0.92485	0.0339287	0.9999	-	ENSG00000160298.18
C21orf91	chr21:17777403-18267371	TKS4_WT	TKS4_KO	27451.3	20030.9	0.72969	-0,454645281364438	-0.136862	-27.031	0.40045	0.397452	0.9999
C22orf15	chr22:23762522-23767972	TKS4_WT	TKS4_KO	96.564	79.5007	0.823478	-0,280197577643744	-0.0843479	-17.6522	1	0	1	+	ENSG00000169314.15
C22orf23	chr22:37943049-38041915	TKS4_WT	TKS4_KO	954.683	1062.87	1.11331	0,154856096094222	0.0466163	11.3311	0.8968	0.0473044	0.9999	-	ENSG00000128346.11
C22orf39	chr22:19440885-19479193	TKS4_WT	TKS4_KO	19835.1	18342	0.924725	-0,112904120808043	-0.0339875	-7.52753	0.9398	0.0269646	0.9999	-	ENSG00000242259.9
C2CD2	chr21:41885109-41954018	TKS4_WT	TKS4_KO	47911.8	45791.1	0.955738	-0,0653136536495388	-0.0196614	-4.42625	0.90845	0.041699	0.9999	-	ENSG00000157617.17
C2CD2L	chr11:119106749-119118544	TKS4_WT	TKS4_KO	14562.7	16579.9	1.13852	0,187156236616671	0.0563396	13.8517	0.75785	0.120417	0.9999	+	ENSG00000172375.14
C2CD3	chr11:74012577-74254703	TKS4_WT	TKS4_KO	45164.3	48839.5	1.08137	0,112865341596081	0.0339759	8.13738	0.90405	0.0438075	0.9999	-	ENSG00000168014.18
C2CD4A	chr15:62066976-62070917	TKS4_WT	TKS4_KO	64.376	88.5709	1.37525	0,459698474922274	0.138383	37.5254	1	0	1	+	ENSG00000198535.5
C2CD4C	chr19:405434-409147	TKS4_WT	TKS4_KO	9085.06	11013.4	1.21225	0,277689191126896	0.0835928	21.2252	0.67325	0.171824	0.9999	-	ENSG00000183186.8
C2CD4D	chr1:151837817-151853712	TKS4_WT	TKS4_KO	32.188	0	0.00309713	-8,33485426933163	-2.50904	-99.6903	1	0	1	-	ENSG00000225556.2
C2CD5	chr12:22448545-22544542	TKS4_WT	TKS4_KO	35095.7	36297.6	1.03425	0,0485797448705151	0.014624	3.42463	0.92775	0.032569	0.9999	-	ENSG00000111731.13
C2CD6	chr2:201487420-201619182	TKS4_WT	TKS4_KO	87.1474	0	0.00114617	-9,76896832897098	-2.94075	-99.8854	1	0	1	-	ENSG00000155754.15
C2orf15	chr2:98997260-99154966	TKS4_WT	TKS4_KO	885.598	1524.1	1.7209	0,783165454242253	0.235756	72.0903	0.61885	0.208415	0.9999	+	ENSG00000273045.7
C2orf16	chr2:27576521-27582722	TKS4_WT	TKS4_KO	124.044	46.6719	0.376755	-1,4083005951471	-0.423941	-62.3245	0.4102	0.387004	0.9999	+	ENSG00000221843.5
C2orf42	chr2:70149879-70191026	TKS4_WT	TKS4_KO	8404.58	10311.1	1.22684	0,294947444471066	0.088788	22.684	0.62745	0.202421	0.9999	-	ENSG00000115998.8
C2orf49	chr2:105331541-105438529	TKS4_WT	TKS4_KO	34358.1	34659.9	1.00878	0,012617197739283	0.00379815	0.878393	0.9893	0.00467199	0.9999	+	ENSG00000135974.10
C2orf50	chr2:11133127-11154564	TKS4_WT	TKS4_KO	1350.36	1789.75	1.32536	0,40638777767078	0.122335	32.5363	0.61805	0.208976	0.9999	+	ENSG00000150873.12
C2orf66	chr2:196804416-196809355	TKS4_WT	TKS4_KO	284.213	172.074	0.605579	-0,723612768910073	-0.217829	-39.4421	0.568	0.245652	0.9999	-	ENSG00000187944.5
C2orf68	chr2:85602842-85649284	TKS4_WT	TKS4_KO	14644.5	19740.6	1.34798	0,430804360046213	0.129685	34.7985	0.8676	0.0616805	0.9999	-	ENSG00000168887.11
C2orf69	chr2:199911292-199928273	TKS4_WT	TKS4_KO	49213.2	38781.2	0.788025	-0,343687094407436	-0.10346	-21.1975	0.4942	0.306097	0.9999	+	ENSG00000178074.6
C2orf72	chr2:231037522-231172827	TKS4_WT	TKS4_KO	3623.21	5125.41	1.41459	0,500387319308623	0.150632	41.4593	0.8075	0.0928575	0.9999	+	ENSG00000204128.6
C2orf74	chr2:61145115-61164828	TKS4_WT	TKS4_KO	32.188	35.2153	1.09376	0,129295272549495	0.0389218	9.37593	1	0	1	+	ENSG00000237651.8
C2orf76	chr2:119281471-119372543	TKS4_WT	TKS4_KO	4421.74	4795.8	1.08459	0,117154753649103	0.0352671	8.45937	0.93445	0.0294439	0.9999	-	ENSG00000186132.15
C2orf78	chr2:73784188-73817148	TKS4_WT	TKS4_KO	1257.73	744.919	0.592305	-0,755587826470749	-0.227455	-40.7695	0.3816	0.418392	0.9999	+	ENSG00000187833.7
C2orf88	chr2:189673119-190203484	TKS4_WT	TKS4_KO	3467.06	1982.67	0.571872	-0,806237078919517	-0.242702	-42.8128	0.5396	0.267928	0.9999	+	ENSG00000187699.10
C2orf92	chr2:97655938-97703066	TKS4_WT	TKS4_KO	303.047	257.836	0.850861	-0,233004401913049	-0.0701413	-14.9139	0.83135	0.0802161	0.9999	+	ENSG00000228486.11
C3	chr19:6677703-6720650	TKS4_WT	TKS4_KO	1025.31	1262	1.23082	0,299625351578255	0.0901962	23.0825	0.77955	0.108156	0.9999	-	ENSG00000125730.18
C3orf14	chr3:62319021-62336213	TKS4_WT	TKS4_KO	137.398	227.393	1.65452	0,726411520182205	0.218672	65.4519	1	0	1	+	ENSG00000114405.11
C3orf18	chr3:50558024-50596166	TKS4_WT	TKS4_KO	11337.7	10588.6	0.933929	-0,0986152481153243	-0.0296861	-6.6071	0.93235	0.030421	0.9999	-	ENSG00000088543.15
C3orf20	chr3:14673469-14773036	TKS4_WT	TKS4_KO	2540.54	2237.55	0.880743	-0,183207568798109	-0.055151	-11.9257	0.7836	0.105906	0.9999	+	ENSG00000131379.10
C3orf22	chr3:126524154-126558965	TKS4_WT	TKS4_KO	124.044	200.478	1.61569	0,692148839135918	0.208358	61.5688	0.69215	0.1598	0.9999	-	ENSG00000180697.9
C3orf33	chr3:155762616-155806278	TKS4_WT	TKS4_KO	8151.1	6923.36	0.849379	-0,235519259956928	-0.0708984	-15.0621	0.75185	0.123869	0.9999	-	ENSG00000174928.16
C3orf38	chr3:88149958-88157966	TKS4_WT	TKS4_KO	31361.6	23971.5	0.764359	-0,387677558836259	-0.116703	-23.5641	0.52785	0.277489	0.9999	+	ENSG00000179021.10
C3orf70	chr3:185076837-185153060	TKS4_WT	TKS4_KO	96.564	0	0.00103451	-9,9168348851483	-2.98526	-99.8965	1	0	1	-	ENSG00000187068.3
C3orf80	chr3:160225421-160485747	TKS4_WT	TKS4_KO	1908.6	1559.79	0.817253	-0,291146067904217	-0.0876437	-18.2747	0.8659	0.0625323	0.9999	+	ENSG00000180044.6
C4A	chr6:31982056-32002681	TKS4_WT	TKS4_KO	0	184.301	1844.01	10,8486307641339	3.26576	184301	0.0479	1.31966	0.9999	+	ENSG00000244731.9
C4B	chr6:32014794-32035418	TKS4_WT	TKS4_KO	54.9594	219.517	3.98873	1,99592894044309	0.600834	298.873	0.3152	0.501414	0.9999	+	ENSG00000224389.9
C4orf19	chr4:37453453-37686403	TKS4_WT	TKS4_KO	146.815	22.1427	0.151398	-2,72357787249402	-0.819879	-84.8602	0.11345	0.945195	0.9999	+	ENSG00000154274.15
C4orf3	chr4:119296418-119304445	TKS4_WT	TKS4_KO	17874.5	20346.3	1.13829	0,186862595690523	0.0562512	13.8286	0.7215	0.141764	0.9999	-	ENSG00000164096.13
C4orf33	chr4:129093690-129116637	TKS4_WT	TKS4_KO	7665.89	5421.65	0.707247	-0,499713524983343	-0.150429	-29.2753	0.4712	0.326795	0.9999	+	ENSG00000151470.13
C4orf36	chr4:86876204-86897256	TKS4_WT	TKS4_KO	673.637	651.703	0.967444	-0,047749538543719	-0.014374	-3.25557	0.95105	0.0217967	0.9999	-	ENSG00000163633.12
C4orf46	chr4:158666674-158672056	TKS4_WT	TKS4_KO	25512.9	21335.4	0.83626	-0,257976630592633	-0.0776587	-16.374	0.6363	0.196338	0.9999	-	ENSG00000205208.5
C4orf47	chr4:185151722-185472263	TKS4_WT	TKS4_KO	87.1474	286.367	3.28339	1,7151849108044	0.516322	228.339	0.2905	0.536854	0.9999	+	ENSG00000205129.9
C4orf48	chr4:1982716-2043970	TKS4_WT	TKS4_KO	13225.8	15238.8	1.1522	0,204392868917746	0.0615284	15.2201	0.84315	0.0740952	0.9999	+	ENSG00000243449.8
C4orf51	chr4:145680099-145938823	TKS4_WT	TKS4_KO	380.777	777.801	2.04239	1,03026139093371	0.31014	104.239	0.5759	0.239653	0.9999	+	ENSG00000237136.8
C4orf54	chr4:99636528-99657828	TKS4_WT	TKS4_KO	32.188	0	0.00309713	-8,33485426933163	-2.50904	-99.6903	1	0	1	-	ENSG00000248713.2
C5	chr9:120942251-121074865	TKS4_WT	TKS4_KO	330.526	234.738	0.710283	-0,493534305633776	-0.148569	-28.9717	0.65075	0.186586	0.9999
C5AR1	chr19:47309860-47322066	TKS4_WT	TKS4_KO	3484.18	7386.15	2.11988	1,08398152888108	0.326311	111.988	0.16485	0.782911	0.9999	+	ENSG00000197405.8
C5AR2	chr19:47331613-47347329	TKS4_WT	TKS4_KO	160.94	44.2855	0.275618	-1,85925872304147	-0.559693	-72.4382	1	0	1	+	ENSG00000134830.6
C5orf15	chr5:133955509-133968625	TKS4_WT	TKS4_KO	53473.6	40736.5	0.761806	-0,392503930802376	-0.118155	-23.8194	0.4744	0.323855	0.9999	-	ENSG00000113583.8
C5orf22	chr5:31532274-31555058	TKS4_WT	TKS4_KO	41964.4	29886.5	0.712188	-0,489670610924553	-0.147406	-28.7812	0.42525	0.371356	0.9999	+	ENSG00000082213.18
C5orf24	chr5:134833602-134859735	TKS4_WT	TKS4_KO	66015.4	64252.6	0.973297	-0,0390477195307126	-0.0117545	-2.67028	0.9429	0.0255344	0.9999	+	ENSG00000181904.9
C5orf34	chr5:43444251-43519854	TKS4_WT	TKS4_KO	13903.7	9014.3	0.648341	-0,625175860947415	-0.188197	-35.1659	0.6731	0.17192	0.9999	-	ENSG00000172244.9
C5orf47	chr5:173989164-174007524	TKS4_WT	TKS4_KO	27.4797	0	0.00362586	-8,10746295370181	-2.44059	-99.6374	1	0	1	+	ENSG00000185056.10
C5orf63	chr5:127042557-127073502	TKS4_WT	TKS4_KO	4424.82	4477.94	1.012	0,0172160427541338	0.00518255	1.20047	0.98045	0.00857455	0.9999	-	ENSG00000164241.14
C6orf120	chr6:169702111-169724500	TKS4_WT	TKS4_KO	32367	34802.2	1.07524	0,104654543487864	0.0315042	7.52369	0.87795	0.0565302	0.9999	+	ENSG00000185127.6
C6orf132	chr6:42101118-42142620	TKS4_WT	TKS4_KO	16303	19571.9	1.20051	0,263644871930587	0.079365	20.0508	0.7023	0.153477	0.9999	-	ENSG00000188112.10
C6orf136	chr6:30647132-30673006	TKS4_WT	TKS4_KO	8022.95	9291.45	1.15811	0,211768496304195	0.0637487	15.8107	0.8862	0.0524683	0.9999	+	ENSG00000204564.12
C6orf141	chr6:49550643-49561916	TKS4_WT	TKS4_KO	11169.7	17466.1	1.5637	0,644962411252563	0.194153	56.3699	0.23635	0.626444	0.9999	+	ENSG00000197261.12
C6orf163	chr6:87344812-87365463	TKS4_WT	TKS4_KO	591.968	354.412	0.598769	-0,739928418730878	-0.222741	-40.1231	0.46995	0.327948	0.9999	+	ENSG00000203872.7
C6orf226	chr6:42890264-42890821	TKS4_WT	TKS4_KO	726.199	1051.52	1.44792	0,533977986095957	0.160743	44.7916	0.52535	0.279551	0.9999	-	ENSG00000221821.4
C6orf52	chr6:10659563-10709782	TKS4_WT	TKS4_KO	1925.89	1039.07	0.539551	-0,890168525476417	-0.267967	-46.0449	0.3647	0.438064	0.9999	-	ENSG00000137434.12
C6orf58	chr6:127577173-127591820	TKS4_WT	TKS4_KO	32.188	70.4306	2.18442	1,12725123313608	0.339336	118.442	1	0	1	+	ENSG00000184530.9
C6orf62	chr6:24667076-24720920	TKS4_WT	TKS4_KO	183324	177667	0.969142	-0,0452199056905654	-0.0136125	-3.08579	0.94025	0.0267567	0.9999	-	ENSG00000112308.13
C6orf89	chr6:36740772-36928964	TKS4_WT	TKS4_KO	76289.8	82087	1.07599	0,105663448394125	0.0318079	7.59891	0.8974	0.0470139	0.9999	+	ENSG00000198663.17
C7orf25	chr7:42909272-42914356	TKS4_WT	TKS4_KO	11708.4	8511.91	0.726994	-0,459984510204219	-0.138469	-27.3006	0.491	0.308919	0.9999	-	ENSG00000136197.14
C7orf26	chr7:6590020-6608726	TKS4_WT	TKS4_KO	16190.3	17468.3	1.07894	0,109608842845966	0.0329955	7.89357	0.84125	0.0750749	0.9999	+	ENSG00000146576.13
C7orf31	chr7:25134691-25180354	TKS4_WT	TKS4_KO	1642.44	733.352	0.446535	-1,16315404581493	-0.350144	-55.3465	0.14555	0.836988	0.9999	-	ENSG00000153790.12
C7orf50	chr7:977963-1138325	TKS4_WT	TKS4_KO	32297.2	35636.9	1.1034	0,141962329692562	0.0427349	10.3405	0.832	0.0798767	0.9999	-	ENSG00000146540.15
C7orf57	chr7:47982434-48061297	TKS4_WT	TKS4_KO	91.8557	44.2855	0.482684	-1,0508505556191	-0.316338	-51.7316	0.20175	0.695186	0.9999	+	ENSG00000164746.14
C7orf61	chr7:100456619-100464260	TKS4_WT	TKS4_KO	496.175	415.697	0.837836	-0,255260431172254	-0.076841	-16.2164	0.79305	0.100699	0.9999	-	ENSG00000185955.5
C8G	chr9:136944869-136946981	TKS4_WT	TKS4_KO	399.611	159.772	0.399969	-1,32203998893243	-0.397974	-60.0031	0.4023	0.39545	0.9999	+	ENSG00000176919.13
C8orf33	chr8:145052466-145065864	TKS4_WT	TKS4_KO	79039.5	85603.1	1.08304	0,115089082327404	0.0346453	8.30419	0.83535	0.0781315	0.9999	+	ENSG00000182307.14
C8orf58	chr8:22599598-22669148	TKS4_WT	TKS4_KO	12527.3	12300.7	0.981912	-0,0263348751599548	-0.00792759	-1.80884	0.98385	0.00707111	0.9999	+	ENSG00000241852.11
C8orf88	chr8:90791767-90985393	TKS4_WT	TKS4_KO	124.044	199.945	1.61139	0,688310033523217	0.207202	61.1395	0.639	0.194499	0.9999	-	ENSG00000253250.3
C9orf116	chr9:135495180-135499869	TKS4_WT	TKS4_KO	6521.24	5010.16	0.768287	-0,380282966921362	-0.114477	-23.1713	0.58905	0.229848	0.9999	-	ENSG00000160345.13
C9orf131	chr9:35041094-35045991	TKS4_WT	TKS4_KO	32.188	92.1506	2.85712	1,51456021496799	0.455928	185.712	1	0	1	+	ENSG00000174038.13
C9orf153	chr9:86220264-86259657	TKS4_WT	TKS4_KO	188.42	299.863	1.59115	0,670066970893478	0.20171	59.1147	0.6602	0.180324	0.9999	-	ENSG00000187753.13
C9orf24	chr9:34378462-34397942	TKS4_WT	TKS4_KO	321.88	204.058	0.63407	-0,657284976007416	-0.197862	-36.593	1	0	1	-	ENSG00000164972.14
C9orf40	chr9:74946582-74952912	TKS4_WT	TKS4_KO	11762.5	12944.6	1.1005	0,138154542325568	0.0415887	10.0496	0.80865	0.0922394	0.9999	-	ENSG00000135045.7
C9orf43	chr9:113407234-113429690	TKS4_WT	TKS4_KO	426.32	530.946	1.24536	0,316561729714648	0.0952946	24.5359	0.8312	0.0802945	0.9999	+	ENSG00000157653.12
C9orf50	chr9:129608871-129642151	TKS4_WT	TKS4_KO	96.564	90.9574	0.941999	-0,0862024293028433	-0.0259495	-5.80009	1	0	1	-	ENSG00000179058.7
C9orf72	chr9:27546545-27573866	TKS4_WT	TKS4_KO	18452.5	16051.4	0.869877	-0,201115986220443	-0.0605419	-13.0123	0.7243	0.140082	0.9999	-	ENSG00000147894.17
C9orf78	chr9:129827289-129835307	TKS4_WT	TKS4_KO	38852.2	29970.5	0.771398	-0,374452040276091	-0.112721	-22.8602	0.5302	0.27556	0.9999	-	ENSG00000136819.15
C9orf85	chr9:71911638-71986058	TKS4_WT	TKS4_KO	12669.3	12467.8	0.984096	-0,0231297138068811	-0.00696274	-1.59045	0.9685	0.0139004	0.9999	+	ENSG00000155621.15
CA11	chr19:48637945-48682245	TKS4_WT	TKS4_KO	5823.8	6708.44	1.1519	0,204013238694637	0.0614141	15.1898	0.8354	0.0781055	0.9999	-	ENSG00000063180.9
CA12	chr15:63321377-63381846	TKS4_WT	TKS4_KO	3737.83	3227.96	0.863596	-0,211572157809605	-0.0636896	-13.6404	0.7495	0.125228	0.9999	-	ENSG00000074410.14
CA13	chr8:85243665-85284073	TKS4_WT	TKS4_KO	16716.5	13790.9	0.824988	-0,277554374596712	-0.0835522	-17.5012	0.63975	0.19399	0.9999	+	ENSG00000185015.8
CA14	chr1:150257257-150282179	TKS4_WT	TKS4_KO	270.859	815.513	3.0101	1,58981020300461	0.478581	201.01	0.2992	0.524038	0.9999	+	ENSG00000118298.12
CA2	chr8:85438858-85481493	TKS4_WT	TKS4_KO	11468.9	13618.2	1.1874	0,24780701403647	0.0745973	18.7401	0.66235	0.178912	0.9999	+	ENSG00000104267.10
CA3	chr8:85438858-85481493	TKS4_WT	TKS4_KO	179.003	292.628	1.63441	0,708771246053449	0.213361	63.4411	0.74865	0.125721	0.9999	+	ENSG00000164879.7
CA4	chr17:60149941-60431426	TKS4_WT	TKS4_KO	422.382	317.396	0.751502	-0,412151460070002	-0.12407	-24.8498	0.85455	0.0682625	0.9999	+	ENSG00000167434.10
CA5A	chr16:87881548-87936575	TKS4_WT	TKS4_KO	32.188	23.336	0.725842	-0,46227172449841	-0.139158	-27.4158	1	0	1	-	ENSG00000174990.8
CA5B	chrX:15627317-15788411	TKS4_WT	TKS4_KO	13647.5	13277.2	0.972867	-0,0396854703350388	-0.0119465	-2.7133	0.9472	0.0235583	0.9999
CA8	chr8:60185411-60281400	TKS4_WT	TKS4_KO	932.682	1965.63	2.10738	1,07545332192633	0.323744	110.738	0.2552	0.593119	0.9999	-	ENSG00000178538.10
CA9	chr9:35673808-35681159	TKS4_WT	TKS4_KO	252.796	275.259	1.08882	0,122769544782389	0.0369573	8.88231	0.94055	0.0266181	0.9999	+	ENSG00000107159.14
CAAP1	chr9:26840684-26892808	TKS4_WT	TKS4_KO	19598.5	16476.1	0.840682	-0,250367057116056	-0.075368	-15.9318	0.69275	0.159423	0.9999	-	ENSG00000120159.13
CAB39	chr2:230712841-230821075	TKS4_WT	TKS4_KO	106875	115234	1.07821	0,108641931450963	0.0327045	7.82128	0.8348	0.0784176	0.9999	+	ENSG00000135932.12
CAB39L	chr13:49308649-49528992	TKS4_WT	TKS4_KO	7930.41	5622.69	0.709007	-0,496127480511263	-0.149349	-29.0993	0.66105	0.179766	0.9999	-	ENSG00000102547.19
CABCOCO1	chr10:61662928-61766766	TKS4_WT	TKS4_KO	87.1474	92.1506	1.05734	0,0804461553286413	0.0242167	5.7345	0.9548	0.0200876	0.9999	+	ENSG00000183346.9
CABIN1	chr22:24011191-24178628	TKS4_WT	TKS4_KO	88286.6	107870	1.22182	0,289027002718652	0.0870058	22.1816	0.5889	0.229958	0.9999	+	ENSG00000099991.18
CABLES1	chr18:23134563-23437969	TKS4_WT	TKS4_KO	12368.3	14945.2	1.20835	0,273032974232323	0.0821911	20.8345	0.77585	0.110222	0.9999	+	ENSG00000134508.13
CABLES2	chr20:62388629-62407283	TKS4_WT	TKS4_KO	15883.2	11073.7	0.697198	-0,520360314509867	-0.156644	-30.2802	0.3967	0.401538	0.9999	-	ENSG00000149679.12
CABP1	chr12:120640551-120686900	TKS4_WT	TKS4_KO	661.823	996.419	1.50549	0,590233910930084	0.177678	50.5491	0.51405	0.288995	0.9999	+	ENSG00000157782.10
CABP4	chr11:67451300-67491108	TKS4_WT	TKS4_KO	32.188	22.1427	0.688884	-0,537666154796718	-0.161854	-31.1116	1	0	1	+	ENSG00000175544.14
CABP7	chr22:29720002-29767007	TKS4_WT	TKS4_KO	454.57	299.44	0.658807	-0,602071144811331	-0.181241	-34.1193	0.71275	0.147063	0.9999	+	ENSG00000100314.4
CABYR	chr18:24138955-24161600	TKS4_WT	TKS4_KO	54.9594	400.238	7.27102	2,8621577689197	0.861595	627.102	0.1649	0.782779	0.9999	+	ENSG00000154040.21
CACFD1	chr9:133459977-133470848	TKS4_WT	TKS4_KO	5558.42	6742.1	1.21295	0,278518618839002	0.0838425	21.2949	0.6794	0.167874	0.9999	+	ENSG00000160325.15
CACHD1	chr1:64468266-64693058	TKS4_WT	TKS4_KO	27061.7	25338.4	0.93632	-0,0949266808414474	-0.0285758	-6.36802	0.85365	0.0687202	0.9999	+	ENSG00000158966.16
CACNA1A	chr19:13206441-13506479	TKS4_WT	TKS4_KO	2104.8	2878.86	1.36774	0,451796049288962	0.136004	36.7742	0.5622	0.250109	0.9999	-	ENSG00000141837.22
CACNA1B	chr9:137867924-138124619	TKS4_WT	TKS4_KO	5447.73	7360.78	1.35116	0,434196567486499	0.130706	35.1158	0.4922	0.307858	0.9999	+	ENSG00000148408.14
CACNA1C	chr12:1941590-2697950	TKS4_WT	TKS4_KO	404.319	359.717	0.889713	-0,16858742794218	-0.0507499	-11.0287	0.61335	0.212292	0.9999	+	ENSG00000151067.23
CACNA1D	chr3:53494610-53846464	TKS4_WT	TKS4_KO	619.448	2690.63	4.34305	2,11870966589047	0.637795	334.305	0.0317	1.49894	0.9999	+	ENSG00000157388.20
CACNA1G	chr17:50556206-50631940	TKS4_WT	TKS4_KO	8026.63	5728.21	0.713654	-0,486702800303779	-0.146512	-28.6346	0.42105	0.375666	0.9999	+	ENSG00000006283.18
CACNA1H	chr16:1153105-1226454	TKS4_WT	TKS4_KO	39703.1	70550.1	1.77694	0,829394882224721	0.249673	77.694	0.29415	0.531431	0.9999	+	ENSG00000196557.13
CACNA1I	chr22:39570752-39689737	TKS4_WT	TKS4_KO	569.967	843.093	1.47911	0,564731400837746	0.170001	47.9112	0.59115	0.228302	0.9999	+	ENSG00000100346.18
CACNA1S	chr1:201023943-201112453	TKS4_WT	TKS4_KO	32.188	0	0.00309713	-8,33485426933163	-2.50904	-99.6903	1	0	1	-	ENSG00000081248.12
CACNA2D1	chr7:81946443-82443956	TKS4_WT	TKS4_KO	225.316	99.4949	0.441827	-1,17844614888564	-0.354748	-55.8173	0.45025	0.346546	0.9999	-	ENSG00000153956.16
CACNA2D2	chr3:50350861-50504244	TKS4_WT	TKS4_KO	12899.7	17311.8	1.34203	0,424415372645902	0.127762	34.2029	0.79325	0.10059	0.9999	-	ENSG00000007402.12
CACNA2D3	chr3:54122551-55074557	TKS4_WT	TKS4_KO	64.376	110.714	1.71869	0,78130601086721	0.235197	71.8686	1	0	1	+	ENSG00000157445.15
CACNA2D4	chr12:1791962-1923804	TKS4_WT	TKS4_KO	211.191	180.722	0.855796	-0,224661100328882	-0.0676297	-14.4204	1	0	1	-	ENSG00000151062.15
CACNB1	chr17:39156893-39197669	TKS4_WT	TKS4_KO	9246	7620.38	0.824183	-0,278963092655881	-0.0839763	-17.5817	0.63355	0.198219	0.9999	-	ENSG00000067191.16
CACNB2	chr10:18140423-18659264	TKS4_WT	TKS4_KO	270.859	1116.81	4.12206	2,04336646625972	0.615115	312.206	0.006	2.22185	0.75488	+	ENSG00000165995.23
CACNB3	chr12:48813761-48828941	TKS4_WT	TKS4_KO	15654.8	19206.5	1.22687	0,29498785925616	0.0888002	22.6875	0.60085	0.221234	0.9999	+	ENSG00000167535.8
CACNB4	chr2:151832770-152099167	TKS4_WT	TKS4_KO	11046.3	6139.37	0.555789	-0,847390251717216	-0.25509	-44.4211	0.1546	0.810791	0.9999	-	ENSG00000182389.20
CACNG6	chr19:53991148-54012666	TKS4_WT	TKS4_KO	128.752	44.2855	0.344469	-1,53755457609713	-0.46285	-65.5531	1	0	1	+	ENSG00000130433.8
CACNG7	chr19:53909277-53943950	TKS4_WT	TKS4_KO	193.128	163.352	0.845902	-0,241437135220361	-0.0726798	-15.4098	1	0	1	+	ENSG00000105605.8
CACTIN	chr19:3594506-3626810	TKS4_WT	TKS4_KO	33875.4	30092.6	0.888332	-0,170828685646415	-0.0514246	-11.1668	0.77625	0.109998	0.9999	-	ENSG00000105298.14
CACUL1	chr10:118676410-118754970	TKS4_WT	TKS4_KO	254512	224660	0.882709	-0,179990324181273	-0.0541825	-11.7291	0.7375	0.132238	0.9999	-	ENSG00000151893.15
CACYBP	chr1:174999434-175012027	TKS4_WT	TKS4_KO	217528	162573	0.747366	-0,420113215461108	-0.126467	-25.2634	0.5466	0.26233	0.9999	+	ENSG00000116161.18
CAD	chr2:27217368-27243943	TKS4_WT	TKS4_KO	178258	207152	1.16209	0,216722811849204	0.0652401	16.2091	0.706	0.151195	0.9999	+	ENSG00000084774.14
CADM3	chr1:159171591-159203313	TKS4_WT	TKS4_KO	27.4797	0	0.00362586	-8,10746295370181	-2.44059	-99.6374	1	0	1	+	ENSG00000162706.13
CADM4	chr19:43607223-43641984	TKS4_WT	TKS4_KO	16858.3	20597.7	1.22181	0,289022635731154	0.0870045	22.1812	0.7315	0.135786	0.9999	-	ENSG00000105767.3
CADPS2	chr7:122318410-122886759	TKS4_WT	TKS4_KO	22560	23465	1.04012	0,0567431459905688	0.0170814	4.01151	0.9212	0.0356461	0.9999	-	ENSG00000081803.17
CAGE1	chr6:7326658-7389742	TKS4_WT	TKS4_KO	151.523	90.9574	0.600551	-0,735640444258959	-0.22145	-39.9449	0.4667	0.330962	0.9999	-	ENSG00000164304.16
CALB1	chr8:90058607-90082879	TKS4_WT	TKS4_KO	128.752	44.2855	0.344469	-1,53755457609713	-0.46285	-65.5531	1	0	1	-	ENSG00000104327.7
CALB2	chr16:71358722-71392129	TKS4_WT	TKS4_KO	2271.31	2999.94	1.32078	0,40139359385546	0.120832	32.0783	0.5933	0.226726	0.9999	+	ENSG00000172137.19
CALCB	chr11:15073592-15078637	TKS4_WT	TKS4_KO	82.439	0	0.00121155	-9,68893214927571	-2.91666	-99.8788	1	0	1	+	ENSG00000175868.14
CALCOCO1	chr12:53708516-53731221	TKS4_WT	TKS4_KO	18517.4	16922.4	0.913865	-0,129946620329493	-0.0391178	-8.61347	0.8161	0.0882566	0.9999	-	ENSG00000012822.16
CALCOCO2	chr17:48831034-48865245	TKS4_WT	TKS4_KO	62607.4	73117.8	1.16788	0,223889142071258	0.0673973	16.7878	0.67525	0.170535	0.9999	+	ENSG00000136436.15
CALCR	chr7:93424485-93574730	TKS4_WT	TKS4_KO	220.608	206.867	0.937741	-0,0927381693854987	-0.027917	-6.22587	0.90575	0.0429917	0.9999	-	ENSG00000004948.16
CALCRL	chr2:187188459-187554505	TKS4_WT	TKS4_KO	1777.45	2122.11	1.1939	0,255677281554343	0.0769665	19.3896	0.85665	0.0671966	0.9999	-	ENSG00000064989.13
CALD1	chr7:134779628-134970729	TKS4_WT	TKS4_KO	83811.9	72411.5	0.863977	-0,210935991482524	-0.0634981	-13.6023	0.69775	0.1563	0.9999	+	ENSG00000122786.20
CALHM1	chr10:103453239-103458900	TKS4_WT	TKS4_KO	59.6677	68.8147	1.15304	0,205445727385999	0.0618453	15.3043	0.9027	0.0444566	0.9999	-	ENSG00000185933.7
CALHM2	chr10:103446782-103452403	TKS4_WT	TKS4_KO	20639.3	26989.5	1.30767	0,387002564125254	0.116499	30.7674	0.56445	0.248375	0.9999	-	ENSG00000138172.11
CALHM3	chr10:103472803-103479240	TKS4_WT	TKS4_KO	427.09	478.123	1.11946	0,162805642049443	0.0490094	11.9462	0.89385	0.0487354	0.9999	-	ENSG00000183128.7
CALHM5	chr6:116494988-116561127	TKS4_WT	TKS4_KO	164.878	671.037	4.06804	2,02433364324797	0.609385	306.804	0.2949	0.530325	0.9999	+	ENSG00000178033.6
CALHM6	chr6:116461374-116463782	TKS4_WT	TKS4_KO	32.188	23.336	0.725842	-0,46227172449841	-0.139158	-27.4158	1	0	1	+	ENSG00000188820.13
CALM1	chr14:90396501-90408268	TKS4_WT	TKS4_KO	290746	233712	0.803836	-0,315027411005913	-0.0948327	-19.6164	0.648	0.188425	0.9999	+	ENSG00000198668.14
CALM2	chr2:47160081-47176936	TKS4_WT	TKS4_KO	552777	445062	0.805138	-0,312691199231619	-0.0941294	-19.4862	0.7337	0.134481	0.9999	-	ENSG00000143933.20
CALM3	chr19:46480787-46625097	TKS4_WT	TKS4_KO	168848	192884	1.14235	0,192008277523705	0.0578003	14.2353	0.7584	0.120102	0.9999	+	ENSG00000160014.17
CALML4	chr15:68054314-68206110	TKS4_WT	TKS4_KO	10932.5	8687.66	0.794665	-0,331580390495789	-0.0998156	-20.5335	0.862	0.0644927	0.9999	-	ENSG00000129007.16
CALML6	chr1:1913750-1917296	TKS4_WT	TKS4_KO	321.88	447.095	1.38889	0,473932980610373	0.142668	38.8891	0.7342	0.134186	0.9999	+	ENSG00000169885.10
CALN1	chr7:71779490-72504271	TKS4_WT	TKS4_KO	96.564	23.336	0.242448	-2,04425234031508	-0.615381	-75.7552	1	0	1	-	ENSG00000183166.11
CALR	chr19:12938608-12944489	TKS4_WT	TKS4_KO	502323	539665	1.07434	0,103448770821153	0.0311412	7.43386	0.8674	0.0617806	0.9999	+	ENSG00000179218.15
CALR3	chr19:16479060-16496167	TKS4_WT	TKS4_KO	27.4797	0	0.00362586	-8,10746295370181	-2.44059	-99.6374	1	0	1	-	ENSG00000269058.6
CALU	chr7:128739358-128775794	TKS4_WT	TKS4_KO	247792	229935	0.927936	-0,107903480017035	-0.0324822	-7.20644	0.8914	0.0499274	0.9999	+	ENSG00000128595.17
CALY	chr10:133324071-133336896	TKS4_WT	TKS4_KO	64.376	0	0.00155096	-9,33261843365355	-2.8094	-99.8449	1	0	1	-	ENSG00000130643.9
CAMK1	chr3:9749951-9844059	TKS4_WT	TKS4_KO	13514.9	12483.4	0.923677	-0,114539032422285	-0.0344797	-7.63226	0.9143	0.0389113	0.9999	-	ENSG00000134072.11
CAMK1D	chr10:12349513-12835545	TKS4_WT	TKS4_KO	16663.5	24458.1	1.46776	0,553618118849297	0.166656	46.7762	0.3606	0.442974	0.9999	+	ENSG00000183049.14
CAMK1G	chr1:209577089-209613939	TKS4_WT	TKS4_KO	59.6677	0	0.00167314	-9,22322221534836	-2.77647	-99.8327	0.0733	1.1349	0.9999	+	ENSG00000008118.10
CAMK2B	chr7:44217153-44326167	TKS4_WT	TKS4_KO	381.548	550.702	1.44322	0,529291167002019	0.159333	44.322	0.34535	0.461741	0.9999	-	ENSG00000058404.20
CAMK2D	chr4:113451031-113762177	TKS4_WT	TKS4_KO	92941.8	90386.8	0.97251	-0,0402154436076383	-0.0121061	-2.74903	0.94405	0.025005	0.9999	-	ENSG00000145349.18
CAMK2G	chr10:73812500-73874582	TKS4_WT	TKS4_KO	39993.8	46104.7	1.1528	0,205136986141815	0.0617524	15.2796	0.71895	0.143301	0.9999	-	ENSG00000148660.21
CAMK2N1	chr1:20482390-20486210	TKS4_WT	TKS4_KO	17828.1	19164.5	1.07496	0,104282836217456	0.0313923	7.49599	0.83225	0.0797462	0.9999	-	ENSG00000162545.6
CAMK2N2	chr3:184229592-184293031	TKS4_WT	TKS4_KO	1925.8	1310.84	0.68069	-0,554931138136416	-0.167051	-31.931	0.83145	0.0801639	0.9999	-	ENSG00000163888.4
CAMK4	chr5:111223582-112017306	TKS4_WT	TKS4_KO	24694.7	36137.6	1.46337	0,549297403593799	0.165355	46.3373	0.6762	0.169925	0.9999	+	ENSG00000152495.11
CAMKK1	chr17:3860314-3895633	TKS4_WT	TKS4_KO	11975.8	16305.2	1.36151	0,445206905462258	0.134021	36.1509	0.48075	0.318081	0.9999	-	ENSG00000004660.15
CAMKK2	chr12:121237691-121297819	TKS4_WT	TKS4_KO	43998.4	54677.9	1.24272	0,313506133197334	0.0943747	24.2724	0.5823	0.234853	0.9999	-	ENSG00000110931.19
CAMKMT	chr2:44275463-44781513	TKS4_WT	TKS4_KO	18524.4	16957.7	0.915426	-0,127485587151286	-0.038377	-8.45745	0.8522	0.0694585	0.9999	+	ENSG00000143919.15
CAMKV	chr3:49857988-49869906	TKS4_WT	TKS4_KO	27.4797	63.0863	2.29104	1,19600502446561	0.360033	129.104	0.4433	0.353302	0.9999	-	ENSG00000164076.17
CAMLG	chr5:134738547-134752157	TKS4_WT	TKS4_KO	25926.4	30972.3	1.19462	0,256555719576358	0.077231	19.4623	0.61415	0.211726	0.9999	+	ENSG00000164615.6
CAMSAP1	chr9:135808486-135907551	TKS4_WT	TKS4_KO	76991.5	77958.5	1.01256	0,0180071302420108	0.00542069	1.25598	0.97535	0.0108395	0.9999	-	ENSG00000130559.19
CAMSAP2	chr1:200738904-200860707	TKS4_WT	TKS4_KO	98964.1	85112.9	0.860038	-0,217527225722371	-0.0654822	-13.9962	0.69045	0.160868	0.9999	+	ENSG00000118200.15
CAMSAP3	chr19:7595862-7618304	TKS4_WT	TKS4_KO	20296.8	20820.7	1.02581	0,0367661049892673	0.0110677	2.58118	0.94955	0.0224822	0.9999	+	ENSG00000076826.10
CAMTA1	chr1:6785451-7769706	TKS4_WT	TKS4_KO	43570.2	36280	0.83268	-0,264166614436293	-0.0795221	-16.732	0.63865	0.194737	0.9999	+	ENSG00000171735.19
CAND1	chr12:67269357-67319953	TKS4_WT	TKS4_KO	292375	244961	0.837832	-0,255267783617757	-0.0768433	-16.2168	0.68515	0.164214	0.9999	+	ENSG00000111530.13
CAND2	chr3:12796653-12841582	TKS4_WT	TKS4_KO	114.627	300.981	2.62433	1,39194671128417	0.419018	162.433	0.55995	0.251851	0.9999	+	ENSG00000144712.12
CANT1	chr17:78991715-79009793	TKS4_WT	TKS4_KO	86580.9	91485.1	1.05664	0,0794879069719108	0.0239282	5.66429	0.879	0.0560111	0.9999	-	ENSG00000171302.17
CANX	chr5:179678559-179731641	TKS4_WT	TKS4_KO	1114640	1049220	0.941308	-0,0872606106671621	-0.0262681	-5.86916	0.90795	0.0419381	0.9999	+	ENSG00000127022.16
CAP1	chr1:40040239-40097470	TKS4_WT	TKS4_KO	327268	284038	0.867906	-0,204388523155681	-0.0615271	-13.2094	0.79955	0.0971544	0.9999	+	ENSG00000131236.18
CAP2	chr6:17393594-17557780	TKS4_WT	TKS4_KO	8509.02	10221.7	1.20128	0,264567425465185	0.0796427	20.1276	0.671	0.173277	0.9999	+	ENSG00000112186.13
CAPG	chr2:85394747-85418467	TKS4_WT	TKS4_KO	57791.6	74109.6	1.28236	0,358800076148788	0.10801	28.2359	0.5241	0.280586	0.9999	-	ENSG00000042493.16
CAPN1	chr11:65179870-65212006	TKS4_WT	TKS4_KO	145265	214716	1.4781	0,563742235945949	0.169703	47.8098	0.3396	0.469032	0.9999	+	ENSG00000014216.16
CAPN10	chr2:240586733-240599104	TKS4_WT	TKS4_KO	20772.3	17230.2	0.82948	-0,269720090987735	-0.0811938	-17.052	0.61875	0.208485	0.9999	+	ENSG00000142330.20
CAPN12	chr19:38647648-38744474	TKS4_WT	TKS4_KO	2692.06	4873.01	1.81011	0,856078634137063	0.257705	81.0112	0.3221	0.492009	0.9999	-	ENSG00000182472.9
CAPN13	chr2:30722770-30809527	TKS4_WT	TKS4_KO	119.335	136.436	1.14318	0,193055716790815	0.0581156	14.3182	1	0	1	-	ENSG00000162949.16
CAPN15	chr16:527711-554636	TKS4_WT	TKS4_KO	39519.1	37528.9	0.94964	-0,0745478936760653	-0.0224412	-5.03603	0.9068	0.0424885	0.9999	+	ENSG00000103326.12
CAPN2	chr1:223677817-223776018	TKS4_WT	TKS4_KO	298987	368401	1.23216	0,301194129428173	0.0906685	23.2164	0.61525	0.210948	0.9999	+	ENSG00000162909.18
CAPN3	chr15:42359500-42412317	TKS4_WT	TKS4_KO	490.696	734.233	1.49621	0,581310943280284	0.174992	49.6208	0.52335	0.281208	0.9999	+	ENSG00000092529.25
CAPN5	chr11:77066970-77126155	TKS4_WT	TKS4_KO	11094.1	10556.6	0.951551	-0,0716467168680763	-0.0215678	-4.84487	0.9145	0.0388163	0.9999	+	ENSG00000149260.18
CAPN6	chrX:111245098-111270483	TKS4_WT	TKS4_KO	2647.29	667.197	0.252058	-1,98816981798576	-0.598499	-74.7942	0.1117	0.951947	0.9999	-	ENSG00000077274.9
CAPN7	chr3:15206245-15252916	TKS4_WT	TKS4_KO	49141.8	42750.3	0.869938	-0,201015719644889	-0.0605118	-13.0062	0.72215	0.141373	0.9999	+	ENSG00000131375.10
CAPN8	chr1:223541608-223665734	TKS4_WT	TKS4_KO	128.752	295.015	2.29034	1,19556232099515	0.3599	129.034	1	0	1	-	ENSG00000203697.12
CAPNS1	chr19:36140065-36150353	TKS4_WT	TKS4_KO	91160.2	128012	1.40425	0,48980260604742	0.147445	40.4253	0.4877	0.311847	0.9999	+	ENSG00000126247.11
CAPNS2	chr16:55509054-55586666	TKS4_WT	TKS4_KO	119.335	107.372	0.899837	-0,152264836051348	-0.0458363	-10.0163	0.9321	0.0305375	0.9999	+	ENSG00000256812.2
CAPRIN1	chr11:34044869-34102610	TKS4_WT	TKS4_KO	593209	471812	0.795355	-0,330328311199409	-0.0994387	-20.4645	0.663	0.178486	0.9999	+	ENSG00000135387.21
CAPRIN2	chr12:30709551-30754951	TKS4_WT	TKS4_KO	23156.5	29894.4	1.29097	0,368456638155572	0.110917	29.0971	0.50465	0.29701	0.9999	-	ENSG00000110888.19
CAPS	chr19:5914253-5978140	TKS4_WT	TKS4_KO	624.927	1817.24	2.90762	1,53983793579688	0.463537	190.762	0.554	0.25649	0.9999	+	ENSG00000105519.18
CAPS2	chr12:75257734-75390914	TKS4_WT	TKS4_KO	7117.66	5376.06	0.755316	-0,404847213363549	-0.121871	-24.4684	0.4562	0.340845	0.9999	-	ENSG00000180881.20
CAPZA1	chr1:112466540-112671616	TKS4_WT	TKS4_KO	287504	240745	0.837362	-0,256076095489751	-0.0770866	-16.2638	0.70895	0.149384	0.9999	+	ENSG00000116489.13
CAPZA2	chr7:116862586-116922049	TKS4_WT	TKS4_KO	124205	112683	0.907234	-0,140453254405187	-0.0422806	-9.27659	0.802	0.0958256	0.9999	+	ENSG00000198898.15
CAPZB	chr1:19338774-19485539	TKS4_WT	TKS4_KO	69749.4	89429.7	1.28216	0,358572774618816	0.107941	28.2157	0.50025	0.300813	0.9999	-	ENSG00000077549.19
CARD10	chr22:37490361-37519415	TKS4_WT	TKS4_KO	23325	32515.7	1.39403	0,47925765320048	0.144271	39.4026	0.4025	0.395234	0.9999	-	ENSG00000100065.15
CARD11	chr7:2906141-3043867	TKS4_WT	TKS4_KO	32.188	67.6214	2.09742	1,0686137187236	0.321685	109.742	1	0	1	-	ENSG00000198286.10
CARD16	chr11:105040217-105045416	TKS4_WT	TKS4_KO	32.188	0	0.00309713	-8,33485426933163	-2.50904	-99.6903	1	0	1	-	ENSG00000204397.10
CARD19	chr9:93096216-93113283	TKS4_WT	TKS4_KO	22118	29423.5	1.3303	0,411746312445298	0.123948	33.0295	0.49045	0.309405	0.9999	+	ENSG00000165233.18
CARD6	chr5:40841196-40855354	TKS4_WT	TKS4_KO	59.6677	66.4282	1.11311	0,154599974835068	0.0465392	11.3113	1	0	1	+	ENSG00000132357.14
CARD8	chr19:48203147-48258194	TKS4_WT	TKS4_KO	15073.9	13960.6	0.926144	-0,110691016611691	-0.0333213	-7.38556	0.84335	0.0739922	0.9999	-	ENSG00000105483.18
CARD9	chr9:136363955-136373669	TKS4_WT	TKS4_KO	229.254	168.732	0.73612	-0,441987693842731	-0.133052	-26.388	0.7135	0.146606	0.9999	-	ENSG00000187796.16
CARF	chr2:202912247-202988263	TKS4_WT	TKS4_KO	4163.38	2979.27	0.715596	-0,482782594585279	-0.145332	-28.4404	0.42475	0.371867	0.9999	+	ENSG00000138380.18
CARHSP1	chr16:8849468-8869006	TKS4_WT	TKS4_KO	37091.1	34750	0.936883	-0,0940598141871084	-0.0283148	-6.31174	0.85925	0.0658805	0.9999	-	ENSG00000153048.11
CARM1	chr19:10871552-10928688	TKS4_WT	TKS4_KO	80868.8	80222.6	0.992009	-0,011574464912041	-0.00348426	-0.799071	0.9884	0.00506726	0.9999	+	ENSG00000142453.12
CARMIL1	chr6:25279373-25620530	TKS4_WT	TKS4_KO	47623.4	48052.4	1.00901	0,0129378385468485	0.00389468	0.900816	0.98115	0.00826459	0.9999	+	ENSG00000079691.18
CARMIL2	chr16:67645003-67660832	TKS4_WT	TKS4_KO	7481.06	7226.4	0.96596	-0,0499649082347262	-0.0150409	-3.40402	0.9741	0.0113965	0.9999	+	ENSG00000159753.15
CARMIL3	chr14:24052008-24069729	TKS4_WT	TKS4_KO	510.3	1069.77	2.09614	1,06773527105634	0.32142	109.614	0.3526	0.452718	0.9999	+	ENSG00000186648.15
CARNMT1	chr9:74952964-75028456	TKS4_WT	TKS4_KO	61790.1	51961.4	0.840934	-0,2499349646801	-0.0752379	-15.9066	0.68545	0.164024	0.9999	-	ENSG00000156017.13
CARNS1	chr11:67415677-67425607	TKS4_WT	TKS4_KO	652.406	1456.11	2.23172	1,15815534865226	0.348639	123.172	0.2701	0.568475	0.9999	+	ENSG00000172508.11
CARS1	chr11:3000928-3057423	TKS4_WT	TKS4_KO	66111.5	72850.3	1.10193	0,140033463227916	0.0421543	10.1931	0.8042	0.0946359	0.9999	-	ENSG00000110619.18
CARS2	chr13:110641409-110723339	TKS4_WT	TKS4_KO	32626.8	32533.3	0.997134	-0,00414031485135135	-0.00124636	-0.286573	0.9957	0.00187149	0.9999	-	ENSG00000134905.17
CASC3	chr17:40140505-40172172	TKS4_WT	TKS4_KO	85237.1	83144.2	0.975446	-0,0358658398717104	-0.0107967	-2.45538	0.9442	0.024936	0.9999	+	ENSG00000108349.17
CASD1	chr7:94477915-94656205	TKS4_WT	TKS4_KO	6004.52	5872.74	0.978054	-0,0320146149333188	-0.00963736	-2.19464	0.97645	0.01035	0.9999	+	ENSG00000127995.17
CASK	chrX:41514933-41923554	TKS4_WT	TKS4_KO	44186.8	44939.4	1.01703	0,0243653529284287	0.0073347	1.70322	0.96865	0.0138331	0.9999	-	ENSG00000147044.23
CASKIN1	chr16:2155777-2196605	TKS4_WT	TKS4_KO	9993.35	11858.3	1.18662	0,246854641594962	0.0743107	18.6617	0.90825	0.0417946	0.9999	-	ENSG00000167971.16
CASKIN2	chr17:75441158-75515537	TKS4_WT	TKS4_KO	31646.8	29912.4	0.945195	-0,0813156943458826	-0.0244785	-5.48047	0.9229	0.0348454	0.9999	-	ENSG00000177303.10
CASP10	chr2:201182884-201229406	TKS4_WT	TKS4_KO	2901.71	2080.27	0.716922	-0,480112921259428	-0.144528	-28.3078	0.6118	0.213391	0.9999	+	ENSG00000003400.16
CASP2	chr7:143288350-143307696	TKS4_WT	TKS4_KO	80858.8	72277.4	0.893872	-0,161859971584189	-0.0487247	-10.6128	0.75195	0.123811	0.9999	+	ENSG00000106144.20
CASP3	chr4:184627695-184649447	TKS4_WT	TKS4_KO	28560.3	27083.6	0.948296	-0,0765913409920077	-0.0230563	-5.17045	0.90605	0.0428478	0.9999	-	ENSG00000164305.19
CASP4	chr11:104942865-104968596	TKS4_WT	TKS4_KO	5386.7	7926.39	1.47147	0,557253652541301	0.16775	47.1465	0.42015	0.376596	0.9999	-	ENSG00000196954.14
CASP5	chr11:104994234-105023902	TKS4_WT	TKS4_KO	27.4797	22.1427	0.806488	-0,310274839166895	-0.093402	-19.3512	1	0	1	-	ENSG00000137757.11
CASP6	chr4:109560245-109703445	TKS4_WT	TKS4_KO	13635.1	12065.4	0.884879	-0,176448158987267	-0.0531162	-11.5121	0.86195	0.0645179	0.9999	-	ENSG00000138794.10
CASP7	chr10:113679193-113730909	TKS4_WT	TKS4_KO	49608.2	44399	0.894993	-0,160051086681064	-0.0481802	-10.5007	0.7904	0.102153	0.9999	+	ENSG00000165806.21
CASP8	chr2:201233442-201287711	TKS4_WT	TKS4_KO	35064.1	29867.8	0.851806	-0,231403006968077	-0.0696592	-14.8194	0.69705	0.156736	0.9999	+	ENSG00000064012.24
CASP8AP2	chr6:89829879-89874436	TKS4_WT	TKS4_KO	67313.8	55476.7	0.824151	-0,279019872399963	-0.0839934	-17.5849	0.71075	0.148283	0.9999	+	ENSG00000118412.13
CASP9	chr1:15491400-15524912	TKS4_WT	TKS4_KO	11486.1	11659.3	1.01508	0,0215919609130877	0.00649983	1.5079	0.96965	0.013385	0.9999	-	ENSG00000132906.18
CASQ1	chr1:160190574-160201886	TKS4_WT	TKS4_KO	27.4797	0	0.00362586	-8,10746295370181	-2.44059	-99.6374	1	0	1	+	ENSG00000143318.13
CASS4	chr20:56411549-56460382	TKS4_WT	TKS4_KO	758.387	613.441	0.808901	-0,305964698285669	-0.0921046	-19.1099	0.73385	0.134393	0.9999	+	ENSG00000087589.17
CAST	chr5:96662036-97037513	TKS4_WT	TKS4_KO	114670	94201.3	0.821499	-0,2836688544142	-0.0853928	-17.8501	0.75345	0.122946	0.9999	+	ENSG00000153113.24
CASTOR1	chr22:30285116-30289505	TKS4_WT	TKS4_KO	991.579	2657.3	2.6797	1,42207029270732	0.428086	167.97	0.0649	1.18776	0.9999	-	ENSG00000239282.8
CASTOR2	chr7:74964692-75073802	TKS4_WT	TKS4_KO	38650.3	29496.5	0.763164	-0,38993467676492	-0.117382	-23.6836	0.72465	0.139872	0.9999	+	ENSG00000274070.2
CASZ1	chr1:10636603-10796650	TKS4_WT	TKS4_KO	11848.4	12358.5	1.04305	0,060810893988287	0.0183059	4.30519	0.93465	0.029351	0.9999	-	ENSG00000130940.15
CAT	chr11:34438933-34472060	TKS4_WT	TKS4_KO	45048.8	53115.6	1.17907	0,237646478661652	0.0715387	17.9068	0.6455	0.190104	0.9999	+	ENSG00000121691.7
CATIP	chr2:218270484-218368393	TKS4_WT	TKS4_KO	32.188	85.2291	2.64275	1,40203975185992	0.422056	164.275	0.31515	0.501483	0.9999	+	ENSG00000158428.4
CATSPER1	chr11:66016751-66026518	TKS4_WT	TKS4_KO	803.159	930.357	1.15835	0,212074239076668	0.0638407	15.8352	0.82045	0.0859479	0.9999	-	ENSG00000175294.6
CATSPER3	chr5:134967906-135011696	TKS4_WT	TKS4_KO	1023	878.969	0.859221	-0,218898848963737	-0.0658951	-14.0779	0.8006	0.0965844	0.9999	+	ENSG00000152705.8
CATSPERB	chr14:91580697-91732086	TKS4_WT	TKS4_KO	119.335	227.393	1.90474	0,929596478823455	0.279836	90.4743	0.5585	0.252977	0.9999	-	ENSG00000133962.8
CATSPERD	chr19:5690294-5778734	TKS4_WT	TKS4_KO	215.899	92.5733	0.429045	-1,22079898264294	-0.367497	-57.0955	0.57615	0.239464	0.9999	+	ENSG00000174898.16
CATSPERE	chr1:244408491-244640504	TKS4_WT	TKS4_KO	610.802	763.077	1.24926	0,32107672965392	0.0966537	24.9263	0.6199	0.207678	0.9999	+	ENSG00000179397.18
CATSPERG	chr19:38335829-38370943	TKS4_WT	TKS4_KO	124.044	579.766	4.67091	2,22370501308017	0.669402	367.091	0.05275	1.27778	0.9999	+	ENSG00000099338.23
CATSPERZ	chr11:64291301-64304770	TKS4_WT	TKS4_KO	482.05	57.358	0.11917	-3,06890236661533	-0.923832	-88.083	0.09885	1.00502	0.9999
CAV1	chr7:116525008-116561185	TKS4_WT	TKS4_KO	482078	556268	1.1539	0,206513482521278	0.0621668	15.3896	0.783	0.106238	0.9999	+	ENSG00000105974.13
CAV2	chr7:116415770-116508541	TKS4_WT	TKS4_KO	144657	194922	1.34748	0,430260535884543	0.129521	34.7477	0.4375	0.359022	0.9999	+	ENSG00000105971.15
CAV3	chr3:8619399-8746758	TKS4_WT	TKS4_KO	64.376	0	0.00155096	-9,33261843365355	-2.8094	-99.8449	1	0	1	+	ENSG00000182533.7
CAVIN1	chr17:42402448-42441934	TKS4_WT	TKS4_KO	148205	155208	1.04725	0,0666087566658533	0.0200512	4.72521	0.9073	0.0422491	0.9999	-	ENSG00000177469.13
CAVIN2	chr2:191834309-191847088	TKS4_WT	TKS4_KO	329.756	249.426	0.756469	-0,40264619872694	-0.121209	-24.3531	0.78855	0.103171	0.9999	-	ENSG00000168497.5
CAVIN3	chr11:6318945-6346369	TKS4_WT	TKS4_KO	16047.8	17284.6	1.07707	0,107111042679009	0.0322436	7.70693	0.8688	0.0610802	0.9999	-	ENSG00000170955.10
CAVIN4	chr9:100578078-100588389	TKS4_WT	TKS4_KO	1630.63	1023.17	0.627492	-0,672331069978327	-0.202392	-37.2508	0.4348	0.36171	0.9999	+	ENSG00000170681.7
CBARP	chr19:1205777-1238512	TKS4_WT	TKS4_KO	13735	16465.6	1.1988	0,261596431817146	0.0787484	19.8805	0.8115	0.0907115	0.9999	-	ENSG00000099625.14
CBFA2T2	chr20:33490069-33650031	TKS4_WT	TKS4_KO	19756.8	26986.8	1.36595	0,44990266772136	0.135434	36.5948	0.45445	0.342514	0.9999	+	ENSG00000078699.22
CBFA2T3	chr16:88874857-88977207	TKS4_WT	TKS4_KO	9415.5	12835	1.36317	0,446969598962211	0.134551	36.3174	0.5278	0.277531	0.9999	-	ENSG00000129993.15
CBFB	chr16:67029148-67101058	TKS4_WT	TKS4_KO	165368	121421	0.734247	-0,445661812884889	-0.134158	-26.5753	0.4312	0.365321	0.9999	+	ENSG00000067955.15
CBL	chr11:119206338-119317130	TKS4_WT	TKS4_KO	155128	156245	1.0072	0,0103509054309636	0.00311593	0.72005	0.98715	0.00561685	0.9999	+	ENSG00000110395.7
CBLB	chr3:105655460-105896032	TKS4_WT	TKS4_KO	8040.15	9341.73	1.16188	0,216464830990411	0.0651624	16.1883	0.7162	0.144966	0.9999	-	ENSG00000114423.23
CBLC	chr19:44777854-44800652	TKS4_WT	TKS4_KO	22389.4	31565.6	1.40984	0,495535434183147	0.149171	40.9844	0.3511	0.454569	0.9999	+	ENSG00000142273.13
CBLL1	chr7:107742752-107764997	TKS4_WT	TKS4_KO	53945.7	44060	0.816748	-0,29203787231052	-0.0879122	-18.3252	0.61055	0.214279	0.9999	+	ENSG00000105879.12
CBLN3	chr14:24423185-24442843	TKS4_WT	TKS4_KO	891.077	1427.19	1.60158	0,679494590246506	0.204548	60.1579	0.72005	0.142637	0.9999	-	ENSG00000139899.11
CBR3	chr21:36130471-36156308	TKS4_WT	TKS4_KO	1380.23	2315.96	1.6779	0,746659410308886	0.224767	67.7903	0.4861	0.313274	0.9999	+	ENSG00000159231.6
CBR4	chr4:168488508-169010284	TKS4_WT	TKS4_KO	21306.8	25705.2	1.20643	0,27074514282808	0.0815024	20.6431	0.81275	0.090043	0.9999	-	ENSG00000145439.12
CBWD1	chr9:120836-179083	TKS4_WT	TKS4_KO	27022.9	23031.5	0.852296	-0,230573208260771	-0.0694095	-14.7704	0.7364	0.132886	0.9999
CBWD3	chr9:68241865-68300035	TKS4_WT	TKS4_KO	2751.82	2874.65	1.04463	0,0629979682384918	0.0189643	4.46343	0.9067	0.0425364	0.9999	+	ENSG00000196873.16
CBWD5	chr9:65666373-65734041	TKS4_WT	TKS4_KO	27083.9	28353.9	1.04689	0,0661114513010384	0.0199015	4.68912	0.91375	0.0391726	0.9999	+	ENSG00000147996.17
CBWD6	chr9:41131308-41198865	TKS4_WT	TKS4_KO	7639.95	7759.34	1.01563	0,0223704566907431	0.00673418	1.56269	0.97125	0.012669	0.9999	-	ENSG00000215126.11
CBX1	chr17:48070058-48101478	TKS4_WT	TKS4_KO	140504	125808	0.895405	-0,159387418473788	-0.0479804	-10.4595	0.7472	0.126563	0.9999	-	ENSG00000108468.15
CBX2	chr17:79776253-79787983	TKS4_WT	TKS4_KO	44037	43519.8	0.988255	-0,017044223851384	-0.00513082	-1.17446	0.9781	0.00961674	0.9999	+	ENSG00000173894.11
CBX3	chr7:26201442-26213607	TKS4_WT	TKS4_KO	302362	283844	0.938756	-0,0911785602841884	-0.0274475	-6.12444	0.8856	0.0527624	0.9999	+	ENSG00000122565.19
CBX4	chr17:79833155-79839440	TKS4_WT	TKS4_KO	51526.5	62259.8	1.20831	0,27298586068011	0.0821769	20.8306	0.60475	0.218424	0.9999	-	ENSG00000141582.15
CBX5	chr12:54230941-54280122	TKS4_WT	TKS4_KO	310070	271296	0.874951	-0,19272610545574	-0.0580163	-12.5049	0.7492	0.125402	0.9999
CBX6	chr22:38861421-38872216	TKS4_WT	TKS4_KO	201527	246887	1.22508	0,292877601103145	0.0881649	22.5081	0.6246	0.204398	0.9999	-	ENSG00000183741.12
CBX7	chr22:39130771-39152680	TKS4_WT	TKS4_KO	11843.7	17123.6	1.44579	0,531862431656363	0.160107	44.5794	0.44865	0.348092	0.9999	-	ENSG00000100307.13
CBX8	chr17:79792131-79797077	TKS4_WT	TKS4_KO	28511.8	36110.3	1.2665	0,340850219305513	0.102606	26.6503	0.49965	0.301334	0.9999	-	ENSG00000141570.11
CBY1	chr22:38656637-38673850	TKS4_WT	TKS4_KO	7483.63	8731.05	1.16668	0,222414177494495	0.0669533	16.6684	0.7341	0.134245	0.9999	+	ENSG00000100211.12
CBY3	chr5:179678559-179731641	TKS4_WT	TKS4_KO	27.4797	79.5007	2.88621	1,52917435380275	0.460327	188.621	1	0	1	-	ENSG00000204659.5
CC2D1A	chr19:13882347-13930879	TKS4_WT	TKS4_KO	25730.4	30267.2	1.17632	0,234280492961582	0.0705255	17.632	0.72885	0.137362	0.9999	+	ENSG00000132024.18
CC2D1B	chr1:52142000-52366291	TKS4_WT	TKS4_KO	28118.3	28376.5	1.00918	0,0131872361513022	0.00396975	0.91826	0.99095	0.00394826	0.9999	-	ENSG00000154222.15
CC2D2A	chr4:15468659-15601557	TKS4_WT	TKS4_KO	19092.4	21646.7	1.13379	0,181147746482444	0.0545309	13.3786	0.765	0.116339	0.9999	+	ENSG00000048342.18
CC2D2B	chr10:95710900-96090235	TKS4_WT	TKS4_KO	261.442	181.915	0.69593	-0,522985292830659	-0.157434	-30.407	1	0	1	+	ENSG00000188649.15
CCAR1	chr10:68721238-68792377	TKS4_WT	TKS4_KO	81923.7	60261.6	0.735582	-0,443041263323774	-0.133369	-26.4418	0.41455	0.382423	0.9999	+	ENSG00000060339.14
CCAR2	chr8:22599598-22669148	TKS4_WT	TKS4_KO	102944	114688	1.11408	0,155854557898501	0.0469169	11.4081	0.82695	0.0825207	0.9999	+	ENSG00000158941.17
CCBE1	chr18:59430938-59698181	TKS4_WT	TKS4_KO	284.984	549.324	1.92724	0,9465328597479	0.284935	92.7235	0.4385	0.35803	0.9999	-	ENSG00000183287.15
CCDC102A	chr16:57512177-57607366	TKS4_WT	TKS4_KO	4277.15	4814.78	1.1257	0,170816309175317	0.0514208	12.5695	0.8613	0.0648456	0.9999	-	ENSG00000135736.6
CCDC102B	chr18:68715215-69214350	TKS4_WT	TKS4_KO	390.194	214.744	0.550467	-0,861271797174805	-0.259269	-44.9533	0.1139	0.943476	0.9999	+	ENSG00000150636.17
CCDC106	chr19:55647399-55653161	TKS4_WT	TKS4_KO	427.09	333.572	0.781086	-0,356447247462458	-0.107301	-21.8914	0.70395	0.152458	0.9999	+	ENSG00000173581.8
CCDC107	chr9:35658291-35665205	TKS4_WT	TKS4_KO	4522.25	4801.81	1.06182	0,0865357125781133	0.0260498	6.18174	0.95225	0.021249	0.9999	+	ENSG00000159884.12
CCDC110	chr4:185151722-185472263	TKS4_WT	TKS4_KO	2307.44	1892.32	0.820103	-0,286123343318154	-0.0861317	-17.9897	0.7818	0.106904	0.9999	-	ENSG00000168491.10
CCDC112	chr5:115267187-115296755	TKS4_WT	TKS4_KO	12959.9	8799.77	0.679002	-0,558511602057766	-0.168129	-32.0998	0.386	0.413413	0.9999	-	ENSG00000164221.13
CCDC113	chr16:58129468-58295025	TKS4_WT	TKS4_KO	14996.3	17677.1	1.17876	0,237273563164888	0.0714265	17.8763	0.8224	0.0849169	0.9999	+	ENSG00000103021.10
CCDC115	chr2:130337932-130347967	TKS4_WT	TKS4_KO	12051.4	16232.4	1.34693	0,429672485492337	0.129344	34.6928	0.7874	0.103805	0.9999	-	ENSG00000136710.10
CCDC116	chr22:21632120-21637329	TKS4_WT	TKS4_KO	504.821	317.158	0.628332	-0,670401137658018	-0.201811	-37.1668	0.55875	0.252782	0.9999	+	ENSG00000161180.11
CCDC117	chr22:28772694-28789301	TKS4_WT	TKS4_KO	75056.3	58865.9	0.78429	-0,350540496060868	-0.105523	-21.571	0.48515	0.314124	0.9999	+	ENSG00000159873.10
CCDC12	chr3:46916309-47009704	TKS4_WT	TKS4_KO	21554.8	23930	1.11019	0,150810556263952	0.0453985	11.0193	0.8957	0.0478374	0.9999	-	ENSG00000160799.12
CCDC120	chrX:49053571-49069858	TKS4_WT	TKS4_KO	6332.48	7466.98	1.17915	0,237750789977034	0.0715701	17.9153	0.7193	0.14309	0.9999	+	ENSG00000147144.13
CCDC121	chr2:27625637-27694980	TKS4_WT	TKS4_KO	2560.23	1974.31	0.771154	-0,374908164061086	-0.112859	-22.8846	0.8021	0.0957715	0.9999	-	ENSG00000176714.10
CCDC122	chr13:43821958-43893932	TKS4_WT	TKS4_KO	3577.75	1856.49	0.518912	-0,946437651288536	-0.284906	-48.1088	0.3514	0.454198	0.9999	-	ENSG00000151773.13
CCDC124	chr19:17933014-17943985	TKS4_WT	TKS4_KO	25029.3	23532.3	0.94019	-0,0889752431569869	-0.0267842	-5.98097	0.89215	0.0495621	0.9999	+	ENSG00000007080.11
CCDC125	chr5:69234794-69333070	TKS4_WT	TKS4_KO	24982.2	22713.2	0.909176	-0,137368975581868	-0.0413522	-9.08243	0.8882	0.0514892	0.9999	-	ENSG00000183323.13
CCDC126	chr7:23597381-23644708	TKS4_WT	TKS4_KO	6518.76	5478.51	0.840425	-0,250809784344104	-0.0755013	-15.9575	0.7205	0.142366	0.9999	+	ENSG00000169193.12
CCDC127	chr5:196867-218153	TKS4_WT	TKS4_KO	12994.9	12530.7	0.964279	-0,0524781106755025	-0.0157975	-3.57214	0.92565	0.0335532	0.9999	-	ENSG00000164366.4
CCDC13	chr3:42692662-42773635	TKS4_WT	TKS4_KO	1544.25	1155.72	0.748418	-0,418083012086576	-0.125856	-25.1582	0.66515	0.17708	0.9999	-	ENSG00000244607.7
CCDC134	chr22:41800678-41915095	TKS4_WT	TKS4_KO	45431.3	41525.9	0.914037	-0,129674853148913	-0.039036	-8.59626	0.95375	0.0205654	0.9999	+	ENSG00000100147.14
CCDC136	chr7:128790761-128822130	TKS4_WT	TKS4_KO	6601.79	4973.34	0.753336	-0,408635028778454	-0.123011	-24.6664	0.5532	0.257118	0.9999	+	ENSG00000128596.17
CCDC137	chr17:81666696-81673907	TKS4_WT	TKS4_KO	54507.4	50764.3	0.931329	-0,102637632177923	-0.030897	-6.86713	0.8352	0.0782095	0.9999	+	ENSG00000185298.13
CCDC138	chr2:108786732-108885485	TKS4_WT	TKS4_KO	30962	21104.6	0.68163	-0,552939003627785	-0.166451	-31.837	0.32035	0.494375	0.9999
CCDC14	chr3:123887382-123961412	TKS4_WT	TKS4_KO	106353	90368.1	0.8497	-0,234974994091401	-0.0707345	-15.03	0.6976	0.156394	0.9999	-	ENSG00000175455.16
CCDC142	chr2:74472831-74482998	TKS4_WT	TKS4_KO	9561.72	11817.1	1.23587	0,305531087349944	0.091974	23.5874	0.59995	0.221885	0.9999	-	ENSG00000135637.14
CCDC146	chr7:77122614-77295204	TKS4_WT	TKS4_KO	5669.2	6048.42	1.06689	0,0934115617938701	0.0281197	6.68901	0.88735	0.051905	0.9999	+	ENSG00000135205.15
CCDC148	chr2:158166649-158456753	TKS4_WT	TKS4_KO	794.513	527.128	0.663503	-0,591825405386963	-0.178157	-33.6497	0.369	0.432974	0.9999	-	ENSG00000153237.18
CCDC149	chr4:24803513-25030946	TKS4_WT	TKS4_KO	2582.92	3299.55	1.27744	0,353254189139813	0.10634	27.7439	0.6516	0.186019	0.9999	-	ENSG00000181982.20
CCDC15	chr11:124954120-125041489	TKS4_WT	TKS4_KO	7019.73	4635.58	0.660369	-0,598655112196324	-0.180213	-33.9631	0.41945	0.37732	0.9999	+	ENSG00000149548.15
CCDC150	chr2:196639631-196733668	TKS4_WT	TKS4_KO	14835.4	11553.8	0.778801	-0,360673637510412	-0.108574	-22.1199	0.59715	0.223917	0.9999	+	ENSG00000144395.18
CCDC152	chr5:42756817-42811892	TKS4_WT	TKS4_KO	220.608	139.245	0.631355	-0,663477687561763	-0.199727	-36.8645	0.7804	0.107683	0.9999	+	ENSG00000198865.10
CCDC153	chr11:119185456-119195841	TKS4_WT	TKS4_KO	458.508	581.382	1.26793	0,342473011564458	0.103095	26.7928	0.73055	0.13635	0.9999	-	ENSG00000248712.8
CCDC154	chr16:1431077-1444489	TKS4_WT	TKS4_KO	119.335	67.6214	0.567015	-0,818541971795143	-0.246406	-43.2985	0.54575	0.263006	0.9999	-	ENSG00000197599.13
CCDC157	chr22:30331987-30378673	TKS4_WT	TKS4_KO	2231.25	2099.49	0.940951	-0,0878091949343577	-0.0264332	-5.90495	0.92475	0.0339757	0.9999	+	ENSG00000187860.11
CCDC159	chr19:11346482-11354951	TKS4_WT	TKS4_KO	573.905	479.739	0.835949	-0,258512883176918	-0.0778201	-16.4051	0.65345	0.184788	0.9999	+	ENSG00000183401.12
CCDC160	chrX:134237181-134246207	TKS4_WT	TKS4_KO	142.107	207.289	1.45836	0,544346893074574	0.163865	45.836	0.7277	0.138048	0.9999	+	ENSG00000203952.10
CCDC163	chr1:45493862-45500111	TKS4_WT	TKS4_KO	2769.88	1880.38	0.678879	-0,558774597108344	-0.168208	-32.1121	0.42895	0.367593	0.9999	-	ENSG00000280670.3
CCDC166	chr8:143706693-143713898	TKS4_WT	TKS4_KO	87.1474	89.7641	1.02999	0,0426327463322445	0.0128337	2.99917	0.83785	0.0768337	0.9999	-	ENSG00000255181.3
CCDC167	chr6:37482937-37499893	TKS4_WT	TKS4_KO	16382.4	10031.7	0.612349	-0,707575040625026	-0.213001	-38.7651	0.3007	0.521867	0.9999	-	ENSG00000198937.9
CCDC168	chr13:102729366-102759072	TKS4_WT	TKS4_KO	1210.65	1142.75	0.943919	-0,0832649418693249	-0.0250652	-5.60809	0.9146	0.0387688	0.9999	-	ENSG00000175820.4
CCDC17	chr1:45620043-45624787	TKS4_WT	TKS4_KO	2568.79	2315.01	0.90121	-0,150064372045407	-0.0451739	-9.87897	0.87075	0.0601065	0.9999	-	ENSG00000159588.15
CCDC170	chr6:151494016-151621193	TKS4_WT	TKS4_KO	229.254	61.8931	0.270294	-1,88739651497674	-0.568163	-72.9706	0.1823	0.739213	0.9999	+	ENSG00000120262.10
CCDC174	chr3:14651761-14672659	TKS4_WT	TKS4_KO	13334.9	11472.6	0.860345	-0,217012867866859	-0.0653274	-13.9655	0.7144	0.146059	0.9999	+	ENSG00000154781.17
CCDC177	chr14:69569798-69574871	TKS4_WT	TKS4_KO	32.188	22.1427	0.688884	-0,537666154796718	-0.161854	-31.1116	1	0	1	-	ENSG00000267909.3
CCDC18	chr1:93149741-93279186	TKS4_WT	TKS4_KO	24003.2	17764.6	0.740094	-0,434219437291481	-0.130713	-25.9906	0.50615	0.295721	0.9999	+	ENSG00000122483.18
CCDC183	chr9:136796337-136841187	TKS4_WT	TKS4_KO	96.564	612.595	6.3384	2,66411847752295	0.80198	533.84	0.31545	0.501069	0.9999	+	ENSG00000213213.14
CCDC184	chr12:48183643-48185926	TKS4_WT	TKS4_KO	555.842	459.027	0.825854	-0,276041102649208	-0.0830967	-17.4146	0.8125	0.0901766	0.9999	+	ENSG00000177875.5
CCDC186	chr10:114120861-114174255	TKS4_WT	TKS4_KO	38142.5	31200.1	0.817988	-0,289847911572803	-0.0872529	-18.2012	0.5811	0.235749	0.9999
CCDC187	chr9:136249972-136306901	TKS4_WT	TKS4_KO	1153.29	4265.82	3.69859	1,88697649140556	0.568037	269.859	0.00695	2.15802	0.83361	-	ENSG00000260220.7
CCDC188	chr22:20148112-20151828	TKS4_WT	TKS4_KO	188.42	157.386	0.835381	-0,259494003112413	-0.0781155	-16.4619	0.8538	0.0686438	0.9999	-	ENSG00000234409.7
CCDC190	chr1:162851290-162868918	TKS4_WT	TKS4_KO	32.188	0	0.00309713	-8,33485426933163	-2.50904	-99.6903	1	0	1	-	ENSG00000185860.14
CCDC191	chr3:113947900-114056613	TKS4_WT	TKS4_KO	6175.56	8842.03	1.43177	0,517800617999219	0.155874	43.1771	0.60655	0.217133	0.9999	-	ENSG00000163617.11
CCDC22	chrX:49235469-49264932	TKS4_WT	TKS4_KO	10875.4	12410.3	1.14113	0,190467885524689	0.0573365	14.1134	0.7585	0.120044	0.9999	+	ENSG00000101997.13
CCDC24	chr1:43991598-44040680	TKS4_WT	TKS4_KO	5443.11	6077.95	1.11663	0,159150846418471	0.0479092	11.663	0.87105	0.0599569	0.9999	+	ENSG00000159214.13
CCDC25	chr8:27633664-27837817	TKS4_WT	TKS4_KO	47470.9	43932.3	0.925458	-0,111761126042625	-0.0336435	-7.45424	0.94225	0.0258339	0.9999	-	ENSG00000147419.19
CCDC28A	chr6:138773768-138793319	TKS4_WT	TKS4_KO	5647.29	6730.58	1.19182	0,253168002507323	0.0762112	19.1821	0.69495	0.158046	0.9999	+	ENSG00000024862.18
CCDC28B	chr1:32200594-32231604	TKS4_WT	TKS4_KO	1355.06	2459.26	1.81481	0,859819734780701	0.258832	81.4812	0.5012	0.299989	0.9999	+	ENSG00000160050.16
CCDC3	chr10:12896624-13099989	TKS4_WT	TKS4_KO	15987.8	24412.4	1.52694	0,610639589881004	0.183821	52.6936	0.2681	0.571703	0.9999	-	ENSG00000151468.11
CCDC33	chr15:74216639-74336472	TKS4_WT	TKS4_KO	87.1474	92.1506	1.05734	0,0804461553286413	0.0242167	5.7345	1	0	1	+	ENSG00000140481.15
CCDC34	chr11:27338511-27363215	TKS4_WT	TKS4_KO	9890.8	7676.82	0.77616	-0,365574187644394	-0.110049	-22.384	0.5826	0.23463	0.9999	-	ENSG00000109881.17
CCDC40	chr17:80036631-80100613	TKS4_WT	TKS4_KO	2834.94	3330.28	1.17472	0,23231770926088	0.0699346	17.4721	0.76795	0.114667	0.9999	+	ENSG00000141519.15
CCDC43	chr17:44677439-44689776	TKS4_WT	TKS4_KO	37361.9	31274.2	0.837062	-0,256594091555741	-0.0772425	-16.2938	0.64875	0.187923	0.9999	-	ENSG00000180329.14
CCDC47	chr17:63745254-63773597	TKS4_WT	TKS4_KO	121613	115930	0.95327	-0,0690434471401069	-0.0207841	-4.67302	0.89375	0.0487839	0.9999	-	ENSG00000108588.15
CCDC50	chr3:191266464-191398659	TKS4_WT	TKS4_KO	98480.9	97659.1	0.991655	-0,012089451549685	-0.00363929	-0.834476	0.98425	0.00689458	0.9999	+	ENSG00000152492.15
CCDC51	chr3:48403853-48446652	TKS4_WT	TKS4_KO	40663.7	29501.8	0.725508	-0,462937169370836	-0.139358	-27.4492	0.59865	0.222827	0.9999	-	ENSG00000164051.14
CCDC57	chr17:82101457-82212892	TKS4_WT	TKS4_KO	70131	82598.3	1.17777	0,236059478976957	0.071061	17.7771	0.65775	0.181939	0.9999	-	ENSG00000176155.21
CCDC59	chr12:82352302-82479239	TKS4_WT	TKS4_KO	49535	30922.3	0.624252	-0,67979886818019	-0.20464	-37.5748	0.40165	0.396152	0.9999	-	ENSG00000133773.12
CCDC6	chr10:59788746-59906556	TKS4_WT	TKS4_KO	187370	175963	0.93912	-0,090617827078518	-0.0272787	-6.08795	0.87265	0.0591599	0.9999	-	ENSG00000108091.11
CCDC61	chr19:45995456-46018616	TKS4_WT	TKS4_KO	3408.08	3632.82	1.06594	0,0921280644934181	0.0277333	6.59414	0.89415	0.0485896	0.9999	+	ENSG00000104983.8
CCDC62	chr12:122773620-122827528	TKS4_WT	TKS4_KO	4372.26	4232.98	0.968145	-0,0467044366963834	-0.0140594	-3.18547	0.94555	0.0243155	0.9999	+	ENSG00000130783.14
CCDC63	chr12:110844488-110907535	TKS4_WT	TKS4_KO	27.4797	23.336	0.849755	-0,234880408868587	-0.070706	-15.0245	1	0	1	+	ENSG00000173093.13
CCDC65	chr12:48904132-48921576	TKS4_WT	TKS4_KO	151.523	22.1427	0.146697	-2,7690847855695	-0.833578	-85.3303	0.2604	0.584359	0.9999	+	ENSG00000139537.11
CCDC66	chr3:56557124-56683265	TKS4_WT	TKS4_KO	16690	14792.3	0.886298	-0,174136456570008	-0.0524203	-11.3702	0.80735	0.0929382	0.9999	+	ENSG00000180376.17
CCDC68	chr18:54901508-54959539	TKS4_WT	TKS4_KO	13977.3	13231.5	0.946642	-0,0791084967195902	-0.023814	-5.33576	0.89225	0.0495134	0.9999	-	ENSG00000166510.14
CCDC69	chr5:151181051-151224350	TKS4_WT	TKS4_KO	10189.8	7645.02	0.750264	-0,41452884165259	-0.124786	-24.9736	0.46235	0.335029	0.9999	-	ENSG00000198624.13
CCDC7	chr10:32446128-32882864	TKS4_WT	TKS4_KO	4492.37	4033.44	0.897845	-0,155462306690194	-0.0467988	-10.2155	0.70995	0.148772	0.9999	+	ENSG00000216937.14
CCDC71	chr3:49162534-49166331	TKS4_WT	TKS4_KO	26614.5	26263.1	0.986797	-0,0191751737227317	-0.0057723	-1.32033	0.9733	0.0117533	0.9999	-	ENSG00000177352.10
CCDC71L	chr7:106569857-106732460	TKS4_WT	TKS4_KO	16364	19615.8	1.19872	0,26148927085199	0.0787161	19.8715	0.6552	0.183626	0.9999	-	ENSG00000253276.5
CCDC73	chr11:32583815-32794662	TKS4_WT	TKS4_KO	82.439	61.8931	0.751076	-0,412968310932901	-0.124316	-24.8924	1	0	1	-	ENSG00000186714.13
CCDC74A	chr2:131522620-131533666	TKS4_WT	TKS4_KO	6969.39	7823.41	1.12254	0,16676292544746	0.0502006	12.2537	0.77755	0.109272	0.9999	+	ENSG00000163040.15
CCDC74B	chr2:130129622-130145112	TKS4_WT	TKS4_KO	1031.64	1401.52	1.3585	0,442015811019965	0.13306	35.8501	0.5119	0.290815	0.9999	-	ENSG00000152076.19
CCDC77	chr12:389346-442642	TKS4_WT	TKS4_KO	13911.4	10419.7	0.749006	-0,416950399616547	-0.125515	-25.0994	0.4987	0.302161	0.9999	+	ENSG00000120647.10
CCDC78	chr16:720580-726880	TKS4_WT	TKS4_KO	3369.64	6179.94	1.83398	0,874978894667047	0.263395	83.3981	0.1414	0.849551	0.9999	-	ENSG00000162004.19
CCDC8	chr19:46410328-46413564	TKS4_WT	TKS4_KO	59.6677	70.0079	1.17301	0,230210995675898	0.0693004	17.3006	0.67255	0.172275	0.9999	-	ENSG00000169515.8
CCDC80	chr3:112596796-112641143	TKS4_WT	TKS4_KO	606.093	684.219	1.12888	0,174891811378396	0.0526477	12.888	0.8522	0.0694585	0.9999	-	ENSG00000091986.16
CCDC81	chr11:86374735-86424908	TKS4_WT	TKS4_KO	982.162	395.465	0.402708	-1,31219310716801	-0.395009	-59.7292	0.14215	0.847253	0.9999	+	ENSG00000149201.10
CCDC82	chr11:96352764-96389924	TKS4_WT	TKS4_KO	23020.1	20447.3	0.888237	-0,170982959515102	-0.051471	-11.1763	0.7501	0.124881	0.9999	-	ENSG00000149231.16
CCDC83	chr11:85855065-85920020	TKS4_WT	TKS4_KO	174.295	155.66	0.893145	-0,163033888681318	-0.0490781	-10.6855	0.8087	0.0922126	0.9999	+	ENSG00000150676.13
CCDC85B	chr11:65890672-65891635	TKS4_WT	TKS4_KO	40286.5	66562.9	1.65224	0,724420403398693	0.218072	65.2237	0.16645	0.778716	0.9999	+	ENSG00000175602.4
CCDC85C	chr14:99397745-99604207	TKS4_WT	TKS4_KO	64047.4	76551.8	1.19524	0,257295927332069	0.0774538	19.5236	0.7932	0.100617	0.9999	-	ENSG00000205476.9
CCDC86	chr11:60842112-60855950	TKS4_WT	TKS4_KO	86559.1	68726.2	0.79398	-0,332824874052107	-0.10019	-20.602	0.5293	0.276298	0.9999	+	ENSG00000110104.13
CCDC87	chr11:66590175-66593063	TKS4_WT	TKS4_KO	752.138	1115.98	1.48368	0,569179350050583	0.17134	48.3679	0.51875	0.285042	0.9999	-	ENSG00000182791.5
CCDC88A	chr2:55287816-55419856	TKS4_WT	TKS4_KO	63234.1	47396.3	0.749537	-0,415927562956743	-0.125207	-25.0463	0.4463	0.350373	0.9999	-	ENSG00000115355.18
CCDC88B	chr11:64325049-64357534	TKS4_WT	TKS4_KO	8970.52	8444.18	0.941326	-0,087233282610275	-0.0262598	-5.86738	0.88565	0.0527379	0.9999	+	ENSG00000168071.22
CCDC88C	chr14:91271322-91417820	TKS4_WT	TKS4_KO	17944.1	15555.8	0.866904	-0,206055739766881	-0.062029	-13.3096	0.74345	0.128748	0.9999	-	ENSG00000015133.20
CCDC89	chr11:85683847-85686195	TKS4_WT	TKS4_KO	339.943	323.731	0.952324	-0,0704760933909738	-0.0212154	-4.76763	0.9534	0.0207249	0.9999	-	ENSG00000179071.5
CCDC9	chr19:47256524-47271958	TKS4_WT	TKS4_KO	8031.33	7351.42	0.915344	-0,127614310800693	-0.0384157	-8.46562	0.86785	0.0615553	0.9999	+	ENSG00000105321.14
CCDC90B	chr11:83259091-83286407	TKS4_WT	TKS4_KO	28212.3	22832.4	0.809307	-0,305240566447407	-0.0918866	-19.0693	0.62065	0.207153	0.9999	-	ENSG00000137500.10
CCDC91	chr12:28185624-28550166	TKS4_WT	TKS4_KO	14771	9559.4	0.647176	-0,627770200646346	-0.188978	-35.2824	0.3042	0.516841	0.9999	+	ENSG00000123106.11
CCDC92	chr12:123761994-123972831	TKS4_WT	TKS4_KO	4827.43	4617.98	0.956613	-0,0639920591802015	-0.0192635	-4.33866	0.94395	0.025051	0.9999	-	ENSG00000119242.9
CCDC92B	chr17:2720800-2749652	TKS4_WT	TKS4_KO	390.194	134.05	0.343715	-1,54071422975983	-0.463801	-65.6285	0.26895	0.570328	0.9999	-	ENSG00000277200.2
CCDC93	chr2:117915480-118014163	TKS4_WT	TKS4_KO	44003.6	44234.1	1.00524	0,00753739523119572	0.00226898	0.52382	0.98875	0.0049135	0.9999	-	ENSG00000125633.11
CCDC96	chr4:6909443-7057952	TKS4_WT	TKS4_KO	252.796	209.253	0.827823	-0,272606626543846	-0.0820628	-17.2177	0.90215	0.0447212	0.9999	-	ENSG00000173013.6
CCDC97	chr19:41262518-41324873	TKS4_WT	TKS4_KO	19910.9	21681.7	1.08894	0,122918852608655	0.0370023	8.89358	0.9492	0.0226423	0.9999	+	ENSG00000142039.4
CCER2	chr19:38878554-38914371	TKS4_WT	TKS4_KO	505.591	516.442	1.02146	0,0306295568793971	0.00922042	2.14578	0.98765	0.00539693	0.9999	-	ENSG00000262484.2
CCHCR1	chr6:31142438-31158231	TKS4_WT	TKS4_KO	14327.9	15529.8	1.08388	0,116211297528974	0.0349831	8.38847	0.85305	0.0690255	0.9999	-	ENSG00000204536.15
CCIN	chr9:36169387-36171334	TKS4_WT	TKS4_KO	91.8557	233.012	2.53505	1,34201236262059	0.403986	153.505	0.40515	0.392384	0.9999	+	ENSG00000185972.6
CCK	chr3:42257825-42266185	TKS4_WT	TKS4_KO	279.505	178.996	0.640532	-0,642657043780926	-0.193459	-35.9468	0.65505	0.183726	0.9999	-	ENSG00000187094.12
CCKBR	chr11:6259837-6272127	TKS4_WT	TKS4_KO	87.1474	0	0.00114617	-9,76896832897098	-2.94075	-99.8854	0.0001	4	0.0299556	+	ENSG00000110148.10
CCL22	chr16:57358782-57366189	TKS4_WT	TKS4_KO	32.188	44.2855	1.37467	0,459090369660878	0.1382	37.4675	1	0	1	+	ENSG00000102962.5
CCL25	chr19:8052317-8062663	TKS4_WT	TKS4_KO	32.188	23.336	0.725842	-0,46227172449841	-0.139158	-27.4158	1	0	1	+	ENSG00000131142.14
CCL26	chr7:75769523-75791597	TKS4_WT	TKS4_KO	367.423	528.762	1.43899	0,525056779771003	0.158058	43.899	0.69865	0.15574	0.9999	-	ENSG00000006606.9
CCL27	chr9:34652184-34662657	TKS4_WT	TKS4_KO	54.9594	0	0.00181622	-9,10484507828174	-2.74083	-99.8184	1	0	1	-	ENSG00000213927.4
CCL28	chr5:43356971-43412391	TKS4_WT	TKS4_KO	32.188	92.1506	2.85712	1,51456021496799	0.455928	185.712	1	0	1	-	ENSG00000151882.11
CCM2	chr7:44992635-45076470	TKS4_WT	TKS4_KO	24018.1	19828.1	0.825549	-0,276574319011873	-0.0832572	-17.4451	0.65035	0.186853	0.9999	+	ENSG00000136280.17
CCM2L	chr20:32010378-32032180	TKS4_WT	TKS4_KO	528.363	756.908	1.43247	0,518506080806963	0.156086	43.2471	0.5883	0.230401	0.9999	+	ENSG00000101331.17
CCN1	chr1:85580760-85583950	TKS4_WT	TKS4_KO	62167.9	123831	1.99188	0,99412961886421	0.299263	99.1878	0.12655	0.897738	0.9999	+	ENSG00000142871.18
CCN2	chr6:131948175-131951372	TKS4_WT	TKS4_KO	18313.3	24911.2	1.36028	0,443900649228409	0.133627	36.0277	0.451	0.345823	0.9999	-	ENSG00000118523.6
CCN3	chr8:119416445-119424434	TKS4_WT	TKS4_KO	1081.89	1068.78	0.987883	-0,0175872704683789	-0.0052943	-1.21166	0.98285	0.00751276	0.9999	+	ENSG00000136999.5
CCN5	chr20:44711861-44810546	TKS4_WT	TKS4_KO	64.376	22.1427	0.344976	-1,53543031911863	-0.462211	-65.5024	1	0	1	+	ENSG00000064205.11
CCNA2	chr4:121801322-121823883	TKS4_WT	TKS4_KO	218896	143328	0.654777	-0,610924767736189	-0.183907	-34.5223	0.46285	0.33456	0.9999	-	ENSG00000145386.11
CCNB1	chr5:69167149-69178245	TKS4_WT	TKS4_KO	303237	234510	0.773356	-0,370796214205622	-0.111621	-22.6644	0.60005	0.221813	0.9999	+	ENSG00000134057.15
CCNB1IP1	chr14:20311367-20333279	TKS4_WT	TKS4_KO	49074.5	43902.2	0.894603	-0,160679985369716	-0.0483695	-10.5397	0.77675	0.109719	0.9999	-	ENSG00000100814.18
CCNB2	chr15:59105145-59125045	TKS4_WT	TKS4_KO	73336.7	60038.9	0.818675	-0,288637368572986	-0.0868885	-18.1325	0.6064	0.217241	0.9999	+	ENSG00000157456.8
CCNB3	chrX:50202712-50351914	TKS4_WT	TKS4_KO	3558.06	2685.87	0.754876	-0,405688194641514	-0.122124	-24.5124	0.56345	0.249145	0.9999	+	ENSG00000147082.18
CCNC	chr6:99398049-99579288	TKS4_WT	TKS4_KO	121504	93361.2	0.76838	-0,380108441586761	-0.114424	-23.162	0.7026	0.153292	0.9999	-	ENSG00000112237.13
CCND1	chr11:69641155-69654474	TKS4_WT	TKS4_KO	680200	648246	0.953023	-0,0694175966301648	-0.0208968	-4.69774	0.91885	0.0367554	0.9999	+	ENSG00000110092.4
CCND3	chr6:41934932-42048894	TKS4_WT	TKS4_KO	23058.2	22615.3	0.980792	-0,0279806393069108	-0.00842301	-1.92078	0.96315	0.0163061	0.9999	-	ENSG00000112576.13
CCNE1	chr19:29811990-29824312	TKS4_WT	TKS4_KO	44794.9	32511.3	0.725782	-0,462392025787814	-0.139194	-27.4218	0.47755	0.320981	0.9999	+	ENSG00000105173.14
CCNE2	chr8:94823286-95118496	TKS4_WT	TKS4_KO	40290.3	26676.6	0.662111	-0,594855917326589	-0.179069	-33.7889	0.7351	0.133654	0.9999	-	ENSG00000175305.18
CCNF	chr16:2429446-2459979	TKS4_WT	TKS4_KO	121427	96366.6	0.793618	-0,333483829894013	-0.100389	-20.6382	0.5454	0.263285	0.9999	+	ENSG00000162063.13
CCNG1	chr5:163089155-163460102	TKS4_WT	TKS4_KO	190768	208810	1.09458	0,130371549881445	0.0392457	9.45756	0.82915	0.0813669	0.9999	+	ENSG00000113328.19
CCNG2	chr4:77154774-77170060	TKS4_WT	TKS4_KO	17837	26250.4	1.47168	0,557463825040366	0.167813	47.168	0.39245	0.406216	0.9999	+	ENSG00000138764.15
CCNH	chr5:87267844-87412971	TKS4_WT	TKS4_KO	63665.2	55635.9	0.873883	-0,194488563490585	-0.0585469	-12.6117	0.81335	0.0897225	0.9999	-	ENSG00000134480.16
CCNI	chr4:77047154-77075989	TKS4_WT	TKS4_KO	187063	242594	1.29686	0,375019462741272	0.112892	29.6857	0.50305	0.298389	0.9999	-	ENSG00000118816.11
CCNI2	chr5:132747425-132778216	TKS4_WT	TKS4_KO	321.88	225.007	0.699133	-0,516360157168562	-0.15544	-30.0867	1	0	1	+	ENSG00000205089.8
CCNJ	chr10:95710900-96090235	TKS4_WT	TKS4_KO	28336.1	23477	0.82852	-0,27139208884977	-0.0816972	-17.148	0.6656	0.176787	0.9999	+	ENSG00000107443.16
CCNJL	chr5:160249082-160339570	TKS4_WT	TKS4_KO	7726.15	7766.82	1.00526	0,00757424621096051	0.00228008	0.526387	0.99195	0.00351022	0.9999	-	ENSG00000135083.17
CCNK	chr14:99397745-99604207	TKS4_WT	TKS4_KO	66538.6	48571.3	0.729972	-0,454086609290194	-0.136694	-27.0028	0.7463	0.127087	0.9999	+	ENSG00000090061.17
CCNL1	chr3:157143120-157160180	TKS4_WT	TKS4_KO	124544	118078	0.948083	-0,0769152664984995	-0.0231538	-5.19174	0.884	0.0535477	0.9999	-	ENSG00000163660.12
CCNL2	chr1:1385710-1399336	TKS4_WT	TKS4_KO	94952.4	137939	1.45272	0,538753568247117	0.162181	45.2717	0.34945	0.456615	0.9999	-	ENSG00000221978.13
CCNO	chr5:55231151-55233608	TKS4_WT	TKS4_KO	5273.44	6260.1	1.1871	0,247437015532311	0.074486	18.7096	0.7407	0.130358	0.9999	-	ENSG00000152669.9
CCNP	chr19:40222207-40227111	TKS4_WT	TKS4_KO	2703.88	3683.76	1.36238	0,44613375408371	0.1343	36.2384	0.54025	0.267405	0.9999	-	ENSG00000105219.10
CCNQ	chrX:153587924-153599165	TKS4_WT	TKS4_KO	23682.3	17406.4	0.734997	-0,444189149411567	-0.133714	-26.5003	0.51565	0.287645	0.9999	-	ENSG00000262919.8
CCNT1	chr12:48688457-48716707	TKS4_WT	TKS4_KO	129653	129153	0.996144	-0,00557442918990429	-0.00167807	-0.385644	0.99135	0.00377299	0.9999	-	ENSG00000129315.11
CCNT2	chr2:134918809-134959342	TKS4_WT	TKS4_KO	69348.1	70450.6	1.0159	0,0227556047803681	0.00685012	1.5898	0.97305	0.0118648	0.9999	+	ENSG00000082258.13
CCNY	chr10:35247024-35572667	TKS4_WT	TKS4_KO	84943.2	85890.5	1.01115	0,01600009155353	0.00481651	1.11521	0.97695	0.0101277	0.9999	+	ENSG00000108100.18
CCNYL1	chr2:207711639-207769906	TKS4_WT	TKS4_KO	32896	28032.1	0.852144	-0,230831582046355	-0.0694872	-14.7856	0.75015	0.124852	0.9999
CCP110	chr16:19523878-19553408	TKS4_WT	TKS4_KO	78992.7	61019.3	0.772468	-0,372453167112415	-0.11212	-22.7532	0.54135	0.266522	0.9999	+	ENSG00000103540.17
CCPG1	chr15:55317183-55508234	TKS4_WT	TKS4_KO	12015.3	9837.79	0.818773	-0,288463848349169	-0.0868363	-18.1227	0.8079	0.0926424	0.9999
CCR10	chr17:42678888-42699993	TKS4_WT	TKS4_KO	403.549	826.621	2.04812	1,03429921638605	0.311355	104.812	0.7009	0.154344	0.9999	-	ENSG00000184451.5
CCR3	chr3:46210698-46266706	TKS4_WT	TKS4_KO	96.564	44.2855	0.459173	-1,12289024615579	-0.338024	-54.0827	1	0	1	+	ENSG00000183625.16
CCR4	chr3:32951554-32956349	TKS4_WT	TKS4_KO	64.376	67.6214	1.05034	0,0708495544016851	0.0213278	5.0335	1	0	1	+	ENSG00000183813.7
CCR6	chr6:167111794-167142712	TKS4_WT	TKS4_KO	215.899	124.979	0.579072	-0,788185043078544	-0.237267	-42.0928	0.43055	0.365976	0.9999	+	ENSG00000112486.18
CCR7	chr17:40553768-40565472	TKS4_WT	TKS4_KO	32.188	46.6719	1.44858	0,534643956531592	0.160944	44.8585	1	0	1	-	ENSG00000126353.3
CCRL2	chr3:46407165-46409523	TKS4_WT	TKS4_KO	54.9594	0	0.00181622	-9,10484507828174	-2.74083	-99.8184	1	0	1	+	ENSG00000121797.10
CCS	chr11:66593161-66606019	TKS4_WT	TKS4_KO	5057.54	7204.99	1.4246	0,510552101035055	0.153691	42.4595	0.4192	0.377579	0.9999	+	ENSG00000173992.9
CCSAP	chr1:229321014-229343795	TKS4_WT	TKS4_KO	52024.7	39400.7	0.757346	-0,400974591104708	-0.120705	-24.2654	0.47025	0.327671	0.9999	-	ENSG00000154429.11
CCSER1	chr4:90127393-91605295	TKS4_WT	TKS4_KO	14347.6	15143.9	1.0555	0,0779268311376701	0.0234583	5.55002	0.87885	0.0560852	0.9999	+	ENSG00000184305.16
CCSER2	chr10:84328551-84518521	TKS4_WT	TKS4_KO	72544.7	68264.4	0.940998	-0,0877366857250908	-0.0264114	-5.90022	0.8738	0.058588	0.9999	+	ENSG00000107771.17
CCT2	chr12:69585458-69601570	TKS4_WT	TKS4_KO	626438	511144	0.815953	-0,293441891924013	-0.0883348	-18.4047	0.7395	0.131062	0.9999	+	ENSG00000166226.13
CCT3	chr1:156308967-156346995	TKS4_WT	TKS4_KO	1027500	904007	0.879812	-0,184732525705307	-0.05561	-12.0188	0.81695	0.0878045	0.9999	-	ENSG00000163468.15
CCT4	chr2:61868084-62141186	TKS4_WT	TKS4_KO	632053	562845	0.890503	-0,167307832720945	-0.0503647	-10.9497	0.8463	0.0724757	0.9999	-	ENSG00000115484.15
CCT5	chr5:10249920-10266412	TKS4_WT	TKS4_KO	643820	534366	0.829993	-0,268829131673444	-0.0809256	-17.0007	0.7111	0.148069	0.9999	+	ENSG00000150753.12
CCT6A	chr7:56051764-56063989	TKS4_WT	TKS4_KO	561047	484561	0.863673	-0,211443298851069	-0.0636508	-13.6327	0.7819	0.106849	0.9999	+	ENSG00000146731.11
CCT6B	chr17:34927860-35121522	TKS4_WT	TKS4_KO	367.423	1087.05	2.95805	1,564644567228	0.471005	195.805	0.2742	0.561933	0.9999	-	ENSG00000132141.14
CCT7	chr2:73233424-73253008	TKS4_WT	TKS4_KO	367247	401255	1.0926	0,127768630722443	0.0384622	9.26025	0.82625	0.0828885	0.9999	+	ENSG00000135624.17
CCT8	chr21:29056325-29073648	TKS4_WT	TKS4_KO	414489	398842	0.96225	-0,0555164607889229	-0.0167121	-3.77501	0.9351	0.0291419	0.9999	-	ENSG00000156261.13
CCZ1	chr7:5898732-5970850	TKS4_WT	TKS4_KO	23337.3	22043.4	0.944557	-0,082290531728954	-0.0247719	-5.54432	0.88085	0.055098	0.9999	+	ENSG00000122674.12
CCZ1B	chr7:6798936-6826275	TKS4_WT	TKS4_KO	12646.6	9835.26	0.777702	-0,362711215583805	-0.109187	-22.2298	0.52625	0.278808	0.9999	-	ENSG00000146574.16
CD109	chr6:73696202-73828317	TKS4_WT	TKS4_KO	189184	214292	1.13272	0,179787822925127	0.0541215	13.2717	0.7366	0.132768	0.9999	+	ENSG00000156535.15
CD14	chr5:140596528-140647630	TKS4_WT	TKS4_KO	82.439	88.5709	1.07429	0,10338475930011	0.0311219	7.42909	1	0	1	-	ENSG00000170458.15
CD151	chr11:832951-838835	TKS4_WT	TKS4_KO	227424	245689	1.08031	0,111448710048243	0.0335494	8.03125	0.88285	0.0541131	0.9999	+	ENSG00000177697.19
CD160	chr1:145719311-145844402	TKS4_WT	TKS4_KO	27.4797	45.4787	1.65262	0,724753012578285	0.218172	65.2618	1	0	1	+	ENSG00000117281.16
CD163L1	chr12:7304331-7444185	TKS4_WT	TKS4_KO	19433.9	18576.6	0.955887	-0,0650886325518689	-0.0195936	-4.41134	0.90965	0.0411257	0.9999	-	ENSG00000177675.9
CD164	chr6:109366513-109382467	TKS4_WT	TKS4_KO	215818	178702	0.828022	-0,272259276127334	-0.0819582	-17.1978	0.66525	0.177015	0.9999	-	ENSG00000135535.17
CD164L2	chr1:27379170-27383333	TKS4_WT	TKS4_KO	2967.63	4690.13	1.58041	0,660298827993589	0.19877	58.041	0.41845	0.378356	0.9999	-	ENSG00000174950.11
CD177	chr19:43353685-43366063	TKS4_WT	TKS4_KO	32.188	22.1427	0.688884	-0,537666154796718	-0.161854	-31.1116	1	0	1	+	ENSG00000204936.10
CD19	chr16:28931734-28939347	TKS4_WT	TKS4_KO	91.8557	70.0079	0.76241	-0,391361983587348	-0.117812	-23.759	1	0	1	+	ENSG00000177455.15
CD1D	chr1:158178029-158186427	TKS4_WT	TKS4_KO	27.4797	23.336	0.849755	-0,234880408868587	-0.070706	-15.0245	1	0	1	+	ENSG00000158473.8
CD2	chr1:116754429-116769229	TKS4_WT	TKS4_KO	32.188	0	0.00309713	-8,33485426933163	-2.50904	-99.6903	1	0	1	+	ENSG00000116824.5
CD200	chr3:112302477-112362812	TKS4_WT	TKS4_KO	547.196	113.1	0.206835	-2,27344735424761	-0.684376	-79.3165	1	0	1
CD207	chr2:70825247-70860787	TKS4_WT	TKS4_KO	27.4797	23.336	0.849755	-0,234880408868587	-0.070706	-15.0245	1	0	1	-	ENSG00000116031.9
CD226	chr18:69853273-69962086	TKS4_WT	TKS4_KO	4149.26	4534.99	1.09296	0,128242350291116	0.0386048	9.29613	0.8452	0.0730405	0.9999	-	ENSG00000150637.9
CD24	chr6:106969830-106976855	TKS4_WT	TKS4_KO	11680	12281	1.05146	0,0723871605546884	0.0217907	5.1455	0.8967	0.0473528	0.9999	-	ENSG00000272398.6
CD274	chr9:5450541-5470567	TKS4_WT	TKS4_KO	1840.28	1530.14	0.83148	-0,266245743134228	-0.080148	-16.852	0.73965	0.130974	0.9999	+	ENSG00000120217.14
CD276	chr15:73683965-73714518	TKS4_WT	TKS4_KO	38231.1	51498.5	1.34703	0,429782728707437	0.129377	34.7031	0.5117	0.290985	0.9999	+	ENSG00000103855.18
CD2AP	chr6:47477745-47627263	TKS4_WT	TKS4_KO	93357.8	77352.8	0.828563	-0,271316729246469	-0.0816745	-17.1437	0.61495	0.21116	0.9999	+	ENSG00000198087.7
CD2BP2	chr16:30350772-30355308	TKS4_WT	TKS4_KO	73834.1	64069.3	0.867747	-0,204653747466439	-0.0616069	-13.2253	0.69745	0.156487	0.9999	-	ENSG00000169217.9
CD300A	chr17:74466372-74484798	TKS4_WT	TKS4_KO	64.376	110.714	1.71869	0,78130601086721	0.235197	71.8686	1	0	1	+	ENSG00000167851.15
CD300C	chr17:74531567-74546115	TKS4_WT	TKS4_KO	64.376	264.995	4.11153	2,03967531056403	0.614003	311.153	0.4009	0.396964	0.9999	-	ENSG00000167850.4
CD302	chr2:159712493-159904756	TKS4_WT	TKS4_KO	312.463	274.303	0.877913	-0,187850753452028	-0.0565487	-12.2087	0.9406	0.026595	0.9999
CD320	chr19:8302126-8308358	TKS4_WT	TKS4_KO	66747.4	62353.6	0.934173	-0,098238631733705	-0.0295728	-6.58272	0.86015	0.0654258	0.9999	-	ENSG00000167775.11
CD33	chr19:51211053-51240016	TKS4_WT	TKS4_KO	1623.61	871.092	0.536544	-0,898231374185468	-0.270395	-46.3456	0.2108	0.676129	0.9999
CD36	chr7:80602206-80679277	TKS4_WT	TKS4_KO	417.674	23.336	0.0560973	-4,1559244494712	-1.25106	-94.3903	0.2408	0.618344	0.9999	+	ENSG00000135218.19
CD37	chr19:49334960-49388081	TKS4_WT	TKS4_KO	482.82	448.821	0.929597	-0,105322628148399	-0.0317053	-7.0403	0.94225	0.0258339	0.9999	+	ENSG00000104894.12
CD38	chr4:15778327-15853232	TKS4_WT	TKS4_KO	96.564	22.1427	0.230103	-2,11964677061338	-0.638077	-76.9897	1	0	1	+	ENSG00000004468.13
CD4	chr12:6789527-6820799	TKS4_WT	TKS4_KO	64.376	111.907	1.73719	0,796754748913827	0.239847	73.7189	1	0	1	+	ENSG00000010610.10
CD40	chr20:46118241-46129858	TKS4_WT	TKS4_KO	14978.3	15715.6	1.04922	0,0693230106522586	0.0208683	4.92242	0.91635	0.0379386	0.9999	+	ENSG00000101017.15
CD44	chr11:35139167-35232402	TKS4_WT	TKS4_KO	508058	800658	1.57592	0,656192820423121	0.197534	57.5918	0.39005	0.40888	0.9999	+	ENSG00000026508.21
CD46	chr1:207752037-207795516	TKS4_WT	TKS4_KO	110120	124143	1.12734	0,172926252125362	0.052056	12.7343	0.77025	0.113368	0.9999	+	ENSG00000117335.21
CD47	chr3:108043090-108094200	TKS4_WT	TKS4_KO	46031.3	46993.7	1.02091	0,029852109886377	0.00898638	2.09075	0.96175	0.0169378	0.9999	-	ENSG00000196776.17
CD5	chr11:61093962-61127852	TKS4_WT	TKS4_KO	32.188	22.1427	0.688884	-0,537666154796718	-0.161854	-31.1116	1	0	1	+	ENSG00000110448.11
CD52	chr1:26282281-26320523	TKS4_WT	TKS4_KO	64.376	23.336	0.363484	-1,46003588882033	-0.439515	-63.6516	1	0	1	+	ENSG00000169442.9
CD55	chr1:207321673-207360966	TKS4_WT	TKS4_KO	42583	45193.1	1.06129	0,0858247335667015	0.0258358	6.12943	0.88285	0.0541131	0.9999	+	ENSG00000196352.18
CD58	chr1:116484691-116571037	TKS4_WT	TKS4_KO	14325.1	14206.2	0.9917	-0,0120244244693014	-0.00361971	-0.830006	0.9868	0.00577086	0.9999	-	ENSG00000116815.16
CD63	chr12:55725322-55730862	TKS4_WT	TKS4_KO	71816.8	84456.2	1.17599	0,233881664632132	0.0704054	17.5995	0.66285	0.178585	0.9999	-	ENSG00000135404.12
CD68	chr17:7579637-7590094	TKS4_WT	TKS4_KO	2962.24	5665.03	1.91238	0,935371828324904	0.281575	91.2383	0.60795	0.216132	0.9999	+	ENSG00000129226.14
CD7	chr17:82314864-82320829	TKS4_WT	TKS4_KO	386.256	645.001	1.66971	0,739594250460979	0.22264	66.9706	0.5982	0.223154	0.9999	-	ENSG00000173762.8
CD70	chr19:6581647-6591150	TKS4_WT	TKS4_KO	0	467.384	4674.84	12,1907012731583	3.66977	467384	0.06895	1.16147	0.9999	-	ENSG00000125726.11
CD72	chr9:35605261-35618427	TKS4_WT	TKS4_KO	330.526	140.016	0.42379	-1,23857847265145	-0.372849	-57.621	0.6059	0.217599	0.9999	-	ENSG00000137101.14
CD74	chr5:150357696-150412936	TKS4_WT	TKS4_KO	349.36	238.08	0.681566	-0,553075055807557	-0.166492	-31.8434	0.74665	0.126883	0.9999	-	ENSG00000019582.17
CD79A	chr19:41877278-41881372	TKS4_WT	TKS4_KO	54.9594	23.336	0.425649	-1,23226253344851	-0.370948	-57.4351	1	0	1	+	ENSG00000105369.10
CD79B	chr17:63928739-63932331	TKS4_WT	TKS4_KO	266.15	701.056	2.63345	1,39695393942197	0.420525	163.345	0.15695	0.804239	0.9999	-	ENSG00000007312.13
CD80	chr3:119498524-119559614	TKS4_WT	TKS4_KO	64.376	0	0.00155096	-9,33261843365355	-2.8094	-99.8449	1	0	1	-	ENSG00000121594.12
CD81	chr11:2328748-2397402	TKS4_WT	TKS4_KO	151812	189614	1.24901	0,320779465675736	0.0965642	24.9005	0.5532	0.257118	0.9999	+	ENSG00000110651.12
CD82	chr11:44565609-44620363	TKS4_WT	TKS4_KO	5297.75	6789.49	1.28157	0,357917460982425	0.107744	28.1575	0.61015	0.214563	0.9999	+	ENSG00000085117.12
CD83	chr6:14117255-14136918	TKS4_WT	TKS4_KO	11401.4	10635.1	0.93279	-0,100376476076383	-0.0302163	-6.72105	0.87465	0.0581657	0.9999	+	ENSG00000112149.10
CD8A	chr2:86784604-86895042	TKS4_WT	TKS4_KO	325.818	384.779	1.18091	0,239895923772792	0.0722159	18.0907	0.77695	0.109607	0.9999	-	ENSG00000153563.16
CD9	chr12:6199945-6295296	TKS4_WT	TKS4_KO	135890	154092	1.13395	0,181352544313718	0.0545926	13.3946	0.74	0.130768	0.9999	+	ENSG00000010278.15
CD93	chr20:23076553-23086830	TKS4_WT	TKS4_KO	82.439	0	0.00121155	-9,68893214927571	-2.91666	-99.8788	1	0	1	-	ENSG00000125810.10
CD96	chr3:111542117-111665996	TKS4_WT	TKS4_KO	661.053	151.125	0.228729	-2,12828750938011	-0.640678	-77.1271	0.03065	1.51357	0.9999	+	ENSG00000153283.13
CD99	chrX:2691294-2741309	TKS4_WT	TKS4_KO	16730.4	30001.8	1.79325	0,842573306775223	0.25364	79.3246	0.15565	0.807851	0.9999	+	ENSG00000002586.20_PAR_Y
CD99L2	chrX:150766335-150898717	TKS4_WT	TKS4_KO	5635.38	10235.8	1.81633	0,861027556317391	0.259195	81.6332	0.1959	0.707966	0.9999	-	ENSG00000102181.21
CDA	chr1:20589096-20618903	TKS4_WT	TKS4_KO	5443.8	9097.95	1.67124	0,740916797291317	0.223038	67.1238	0.29415	0.531431	0.9999	+	ENSG00000158825.6
CDADC1	chr13:49247874-49293486	TKS4_WT	TKS4_KO	5063.88	4535.42	0.895643	-0,159003740847184	-0.0478649	-10.4357	0.78365	0.105878	0.9999	+	ENSG00000102543.14
CDAN1	chr15:42723543-42737133	TKS4_WT	TKS4_KO	20252.3	22824.6	1.12701	0,172503014102631	0.0519286	12.7012	0.7492	0.125402	0.9999	-	ENSG00000140326.13
CDC123	chr10:12196187-12250589	TKS4_WT	TKS4_KO	158391	125539	0.792589	-0,335354501350522	-0.100952	-20.7411	0.5976	0.223589	0.9999	+	ENSG00000151465.14
CDC14A	chr1:100345000-100520281	TKS4_WT	TKS4_KO	9531.93	7870.83	0.825735	-0,276249382787064	-0.0831594	-17.4265	0.65455	0.184057	0.9999	+	ENSG00000079335.20
CDC14B	chr9:96492742-96619843	TKS4_WT	TKS4_KO	47713.8	50512	1.05865	0,0822194089267588	0.0247505	5.86454	0.8882	0.0514892	0.9999	-	ENSG00000081377.17
CDC16	chr13:114234896-114281069	TKS4_WT	TKS4_KO	60169.7	59714.2	0.99243	-0,0109631010850549	-0.00330022	-0.757024	0.98645	0.00592492	0.9999	+	ENSG00000130177.16
CDC20	chr1:43358980-43363203	TKS4_WT	TKS4_KO	270797	191561	0.707397	-0,499407663905827	-0.150337	-29.2603	0.4311	0.365422	0.9999	+	ENSG00000117399.14
CDC20B	chr5:55112970-55173177	TKS4_WT	TKS4_KO	96.564	23.336	0.242448	-2,04425234031508	-0.615381	-75.7552	1	0	1	-	ENSG00000164287.13
CDC23	chr5:138179111-138213323	TKS4_WT	TKS4_KO	68081.3	58143.1	0.854025	-0,227650229771866	-0.0685295	-14.5975	0.8455	0.0728864	0.9999	-	ENSG00000094880.11
CDC25A	chr3:48157145-48188417	TKS4_WT	TKS4_KO	47233	32331	0.684501	-0,546875632403577	-0.164626	-31.5499	0.35805	0.446056	0.9999	-	ENSG00000164045.12
CDC25B	chr20:3786950-3806121	TKS4_WT	TKS4_KO	179984	256437	1.42478	0,510735535886734	0.153747	42.4776	0.42845	0.3681	0.9999	+	ENSG00000101224.18
CDC25C	chr5:138285264-138349729	TKS4_WT	TKS4_KO	24409.2	16028.9	0.656676	-0,606746499694882	-0.182649	-34.3324	0.51755	0.286048	0.9999	-	ENSG00000158402.21
CDC26	chr9:113266991-113275579	TKS4_WT	TKS4_KO	13338.3	8005.47	0.60019	-0,736509587244451	-0.221711	-39.981	0.247	0.607303	0.9999	-	ENSG00000176386.9
CDC27	chr17:47117702-47189295	TKS4_WT	TKS4_KO	266261	231591	0.869789	-0,2012618583358	-0.0605859	-13.0211	0.77815	0.108937	0.9999
CDC34	chr19:531719-542088	TKS4_WT	TKS4_KO	58240.7	48720.8	0.836542	-0,257489388871526	-0.077512	-16.3458	0.6091	0.215311	0.9999	+	ENSG00000099804.9
CDC37	chr19:10391127-10403568	TKS4_WT	TKS4_KO	131159	111785	0.852286	-0,230590005198368	-0.0694145	-14.7714	0.68275	0.165738	0.9999
CDC37L1	chr9:4679568-4708399	TKS4_WT	TKS4_KO	24097.6	18372.4	0.762417	-0,391347503740352	-0.117807	-23.7583	0.47885	0.319801	0.9999	+	ENSG00000106993.12
CDC40	chr6:110180426-110232232	TKS4_WT	TKS4_KO	56244.6	55133.6	0.980247	-0,0287827326419999	-0.00866447	-1.9753	0.95485	0.0200648	0.9999	+	ENSG00000168438.15
CDC42	chr1:22023993-22101360	TKS4_WT	TKS4_KO	369255	335811	0.909428	-0,136967928705723	-0.0412315	-9.05715	0.8713	0.0598323	0.9999	+	ENSG00000070831.18
CDC42BPA	chr1:226989857-227318502	TKS4_WT	TKS4_KO	158714	144119	0.908042	-0,139168753920781	-0.041894	-9.19578	0.8066	0.0933418	0.9999	-	ENSG00000143776.20
CDC42BPB	chr14:102922429-103057549	TKS4_WT	TKS4_KO	110064	142105	1.29111	0,368614355648439	0.110964	29.1112	0.5229	0.281581	0.9999	-	ENSG00000198752.11
CDC42BPG	chr11:64823051-64844686	TKS4_WT	TKS4_KO	28133.4	34685.8	1.2329	0,302060273924331	0.0909292	23.2904	0.64425	0.190946	0.9999	-	ENSG00000171219.9
CDC42EP1	chr22:37560479-37569405	TKS4_WT	TKS4_KO	88733.7	89297.2	1.00635	0,00913280174521577	0.00274925	0.635045	0.9874	0.00550688	0.9999	+	ENSG00000128283.7
CDC42EP2	chr11:65314865-65322417	TKS4_WT	TKS4_KO	20810.8	23588.3	1.13346	0,180738205931683	0.0544076	13.3464	0.7214	0.141824	0.9999	+	ENSG00000149798.5
CDC42EP3	chr2:37641943-37672949	TKS4_WT	TKS4_KO	56877.2	50584	0.889355	-0,169169004272828	-0.0509249	-11.0645	0.7459	0.127319	0.9999	-	ENSG00000163171.8
CDC42EP4	chr17:73283623-73312001	TKS4_WT	TKS4_KO	69201.2	84455.6	1.22044	0,28739565498965	0.0865147	22.0435	0.6076	0.216382	0.9999	-	ENSG00000179604.10
CDC42EP5	chr19:54465025-54473296	TKS4_WT	TKS4_KO	376.069	565.976	1.50484	0,589614797224975	0.177492	50.4845	0.61225	0.213071	0.9999	-	ENSG00000167617.3
CDC42SE1	chr1:151036320-151059626	TKS4_WT	TKS4_KO	44048	51192.9	1.16221	0,216866762956257	0.0652834	16.2207	0.69405	0.158609	0.9999	-	ENSG00000197622.13
CDC42SE2	chr5:131264052-131417962	TKS4_WT	TKS4_KO	68431	68451.2	1.0003	0,000425802587293924	0.000128179	0.0295187	0.9992	0.000347575	0.9999	+	ENSG00000158985.14
CDC45	chr22:19479293-19520612	TKS4_WT	TKS4_KO	26065.4	20080.6	0.770394	-0,376331973050622	-0.113287	-22.9606	0.49515	0.305263	0.9999	+	ENSG00000093009.11
CDC5L	chr6:44387705-44450425	TKS4_WT	TKS4_KO	99881	76618.5	0.767098	-0,382517045281317	-0.115149	-23.2902	0.51565	0.287645	0.9999	+	ENSG00000096401.8
CDC6	chr17:40287877-40304657	TKS4_WT	TKS4_KO	171348	125661	0.733367	-0,447392080389873	-0.134678	-26.6633	0.4739	0.324313	0.9999	+	ENSG00000094804.12
CDC7	chr1:91498967-91569835	TKS4_WT	TKS4_KO	46472.4	23379.4	0.503082	-0,99113318073193	-0.298361	-49.6918	0.09455	1.02434	0.9999	+	ENSG00000097046.13
[truncated: 12,329 more rows]

## Sheet: Supplementary Table S3
lncRNA levels
gene	locus	sample_1	sample_2	value_WT	value_KO	FC (KO/WT)	log2(fold_change)	%	p_value	-log10(p_value)	q_value	chain	ENSG_id
A1BG-AS1	chr19:58345182-58366578	TKS4_WT	TKS4_KO	32.188	70.0079	2.17133	1,07891532997797	117.133	1	0	1	+	ENSG00000268895.6
A2M-AS1	chr12:8950043-9215657	TKS4_WT	TKS4_KO	978.995	1154.41	1.17916	0,236434375700985	17.916	0.8827	0.0541869	0.9999	+	ENSG00000245105.4
AADACL2-AS1	chr3:151733926-151928175	TKS4_WT	TKS4_KO	257.504	338.345	1.31382	0,388734798979254	31.3819	0.8784	0.0563077	0.9999	-	ENSG00000242908.6
AATBC	chr21:43805757-43812567	TKS4_WT	TKS4_KO	275.567	456.403	1.65599	0,722995316945224	65.5994	0.48715	0.312337	0.9999	-	ENSG00000215458.8
ABALON	chr20:31664451-31723963	TKS4_WT	TKS4_KO	7650.73	12175.7	1.59144	0,670158693844715	59.1435	0.7327	0.135074	0.9999	+	ENSG00000281376.1
ACOXL-AS1	chr2:110732538-111120610	TKS4_WT	TKS4_KO	0	23.336	234.36	4,55065444994586	23336	1	0	1	-	ENSG00000204581.3
ACTA2-AS1	chr10:88932683-89017059	TKS4_WT	TKS4_KO	124.044	452.823	3.64837	1,85682996893336	264.837	0.46945	0.328411	0.9999	+	ENSG00000180139.11
ACTR3-AS1	chr2:113831182-113962596	TKS4_WT	TKS4_KO	32.188	23.336	0.725842	-0,501935336213069	-27.4158	1	0	1	-	ENSG00000228857.3
ACVR2B-AS1	chr3:38346759-38493142	TKS4_WT	TKS4_KO	422.382	328.504	0.777794	-0,365609892863802	-22.2206	0.82585	0.0830988	0.9999	-	ENSG00000229589.1
ADAMTSL4-AS1	chr1:150548563-150579738	TKS4_WT	TKS4_KO	255523	309128	1.20979	0,274746000188693	20.9785	0.63145	0.199661	0.9999
ADAMTSL4-AS2	chr1:150548563-150579738	TKS4_WT	TKS4_KO	0	68.8147	689.147	6,106739847847	68814.7	1	0	1	-	ENSG00000237781.3
ADCY6-DT	chr12:48789146-48790535	TKS4_WT	TKS4_KO	146.815	142.587	0.971221	-0,0509387800023313	-2.87785	0.96735	0.0144164	0.9999	+	ENSG00000257660.5
ADGRL1-AS1	chr19:14137151-14206245	TKS4_WT	TKS4_KO	354.068	448.821	1.26754	0,338366240048077	26.7537	1	0	1	+	ENSG00000267169.2
ADIRF-AS1	chr10:86965286-87010226	TKS4_WT	TKS4_KO	15391.7	16485.2	1.07104	0,0989338275965111	7.10443	0.9525	0.021135	0.9999	-	ENSG00000272734.1
ADNP-AS1	chr20:50888917-50958564	TKS4_WT	TKS4_KO	169.586	257.541	1.51834	0,594862947200798	51.834	0.75325	0.123061	0.9999	+	ENSG00000259456.4
ADORA2A-AS1	chr22:24270816-24528681	TKS4_WT	TKS4_KO	0	70.0079	701.079	6,1315051161369	70007.9	1	0	1	-	ENSG00000178803.12
ADPGK-AS1	chr15:72751293-72798199	TKS4_WT	TKS4_KO	587.26	453.061	0.771522	-0,376430235348078	-22.8478	0.83595	0.0778197	0.9999	+	ENSG00000260898.6
AFAP1-AS1	chr4:7754089-7940296	TKS4_WT	TKS4_KO	417.674	384.779	0.921261	-0,121422372210785	-7.87387	0.9488	0.0228253	0.9999	+	ENSG00000272620.2
AFDN-DT	chr6:167823889-167972023	TKS4_WT	TKS4_KO	257.504	211.402	0.821035	-0,289515298681686	-17.8965	0.88135	0.0548516	0.9999	-	ENSG00000198221.11
AGAP1-IT1	chr2:235494042-236131795	TKS4_WT	TKS4_KO	780.388	765.978	0.981537	-0,028547808854784	-1.84628	0.98515	0.00649764	0.9999	+	ENSG00000235529.2
AGAP2-AS1	chr12:57723760-57742201	TKS4_WT	TKS4_KO	10221.4	8420.85	0.823847	-0,279679046254244	-17.6153	0.84285	0.0742497	0.9999	+	ENSG00000255737.2
AGAP5	chr10:73674274-73730514	TKS4_WT	TKS4_KO	8856.67	10460	1.18103	0,239897489503453	18.1029	0.73545	0.133447	0.9999
AGK-DT	chr7:141073401-141551308	TKS4_WT	TKS4_KO	32.188	0	0.00309713	-8,37451788104629	-99.6903	1	0	1	-	ENSG00000261570.2
AIRN	chr6:159969081-160111504	TKS4_WT	TKS4_KO	0	46.6719	467.719	5,54757013097586	46671.9	1	0	1	-	ENSG00000268257.2
ALDH1L1-AS1	chr3:126006356-126210169	TKS4_WT	TKS4_KO	0	23.336	234.36	4,55065444994586	23336	1	0	1
ALG14-AS1	chr1:94974404-95072974	TKS4_WT	TKS4_KO	0	44.2855	443.855	5,47201654410515	44285.5	1	0	1	+	ENSG00000230427.1
ALMS1-IT1	chr2:73385757-73609919	TKS4_WT	TKS4_KO	1289.15	677.72	0.525748	-0,92856469989355	-47.4252	0.57105	0.243326	0.9999	+	ENSG00000230002.3
ALOX12-AS1	chr17:6985122-7012334	TKS4_WT	TKS4_KO	59.6677	228.587	3.82626	1,91437383339669	282.626	0.47785	0.320708	0.9999	-	ENSG00000215067.11
ANKRD44-IT1	chr2:196962616-197310787	TKS4_WT	TKS4_KO	160.94	0	0.000620964	-10,6612436673006	-99.9379	1	0	1	-	ENSG00000236977.1
AP4B1-AS1	chr1:113812611-113914086	TKS4_WT	TKS4_KO	256.734	130.708	0.50931	-0,978432092207947	-49.069	0.59415	0.226104	0.9999	+	ENSG00000226167.1
APCDD1L-DT	chr20:58459100-58619892	TKS4_WT	TKS4_KO	96.564	39.7504	0.412257	-1,29175470261152	-58.7743	1	0	1	+	ENSG00000231290.6
APOA1-AS	chr11:116835750-117098453	TKS4_WT	TKS4_KO	0	39.7504	398.504	5,31652230028555	39750.4	1	0	1	+	ENSG00000235910.2
APTR	chr7:77653340-77783022	TKS4_WT	TKS4_KO	5213.09	4452.34	0.854072	-0,227819315284814	-14.5928	0.92425	0.0342105	0.9999	-	ENSG00000214293.10
ARAP1-AS2	chr11:72685068-72752408	TKS4_WT	TKS4_KO	32.188	44.2855	1.37467	0,419426757946219	37.4675	1	0	1	+	ENSG00000245148.2
ARF4-AS1	chr3:57556273-57693118	TKS4_WT	TKS4_KO	913.078	444.836	0.487239	-1,03871944599332	-51.2761	0.48005	0.318714	0.9999	+	ENSG00000272146.6
ARFGEF1-DT	chr8:67343833-67747114	TKS4_WT	TKS4_KO	27.4797	340.146	12.3368	3,57857234680882	1133.68	1	0	1	+	ENSG00000271966.1
ARHGAP15-AS1	chr2:143070972-143768352	TKS4_WT	TKS4_KO	64.376	132.324	2.05385	1,01833159986663	105.385	1	0	1	-	ENSG00000231758.3
ARHGAP22-IT1	chr10:48306672-48656265	TKS4_WT	TKS4_KO	459.278	563.114	1.22604	0,291177708552111	22.6036	0.8929	0.0491972	0.9999	-	ENSG00000248682.1
ARHGAP26-IT1	chr5:142770369-143229011	TKS4_WT	TKS4_KO	0	35.2153	353.153	5,14222144699377	35215.3	1	0	1	+	ENSG00000230789.1
ARHGAP29-AS1	chr1:94168904-94336179	TKS4_WT	TKS4_KO	284.213	988.137	3.47588	1,79281733061547	247.588	0.18115	0.741962	0.9999	+	ENSG00000226835.4
ARHGAP31-AS1	chr3:119294288-119420714	TKS4_WT	TKS4_KO	0	22.1427	222.427	4,47526001964755	22142.7	1	0	1	-	ENSG00000241155.1
ARHGAP42-AS1	chr11:100684160-100993941	TKS4_WT	TKS4_KO	256.734	466.904	1.81831	0,857552038438552	81.8311	0.6506	0.186686	0.9999	-	ENSG00000248027.1
ARHGAP5-AS1	chr14:32072587-32159728	TKS4_WT	TKS4_KO	1128.98	1008.43	0.893232	-0,164043238611741	-10.6768	0.92635	0.0332249	0.9999	-	ENSG00000258655.2
ARHGEF26-AS1	chr3:154024400-154257827	TKS4_WT	TKS4_KO	146.815	295.675	2.01324	1,00070743664704	101.324	0.60235	0.220151	0.9999	-	ENSG00000243069.9
ARHGEF2-AS2	chr1:155946838-155991262	TKS4_WT	TKS4_KO	257.504	330.653	1.28396	0,355567637645208	28.3959	0.8622	0.064392	0.9999	+	ENSG00000273002.1
ARHGEF35-AS1	chr7:144186082-144380632	TKS4_WT	TKS4_KO	87.1474	0	0.00114617	-9,78377420614462	-99.8854	0.02475	1.60642	0.9999
ARHGEF7-AS1	chr13:111113811-111305734	TKS4_WT	TKS4_KO	730.137	462.554	0.633567	-0,660208098687819	-36.6433	0.68775	0.162569	0.9999
ARHGEF9-IT1	chrX:63634966-63785546	TKS4_WT	TKS4_KO	0	22.1427	222.427	4,47526001964755	22142.7	1	0	1	-	ENSG00000231729.1
ARIH2OS	chr3:48917787-48986382	TKS4_WT	TKS4_KO	798.451	424.952	0.532279	-0,911370262228021	-46.7721	0.58625	0.231917	0.9999	-	ENSG00000221883.4
ARLNC1	chr16:80828734-80892596	TKS4_WT	TKS4_KO	376.069	289.947	0.771055	-0,378541849578931	-22.8945	0.6756	0.17031	0.9999	-	ENSG00000260896.6
ARMC2-AS1	chr6:108848409-109094846	TKS4_WT	TKS4_KO	0	23.336	234.36	4,55065444994586	23336	1	0	1	-	ENSG00000230290.1
ARRDC1-AS1	chr9:137605640-137618895	TKS4_WT	TKS4_KO	2905.65	1995.96	0.686935	-0,54220227431361	-31.3065	0.7922	0.101165	0.9999	-	ENSG00000203993.7
ARRDC3-AS1	chr5:91368630-91420715	TKS4_WT	TKS4_KO	1655.03	1503.77	0.908611	-0,13904894778845	-9.13886	0.9457	0.0242466	0.9999	+	ENSG00000281357.4
ARSD-AS1	chrX:2903971-2929345	TKS4_WT	TKS4_KO	32.188	92.1506	2.85712	1,47489660325333	185.712	1	0	1	+	ENSG00000229851.1
ASAP1-IT2	chr8:130052103-130443848	TKS4_WT	TKS4_KO	1065.37	1160.03	1.08884	0,121578378610464	8.88434	0.94605	0.0240859	0.9999	-	ENSG00000280543.1
ASB16-AS1	chr17:44170703-44186717	TKS4_WT	TKS4_KO	7324.91	7942.35	1.08429	0,116576125377121	8.4292	0.85445	0.0683133	0.9999	-	ENSG00000267080.7
ASH1L-AS1	chr1:155335262-155563944	TKS4_WT	TKS4_KO	743.492	1170.66	1.57447	0,653117109406827	57.4466	0.6107	0.214172	0.9999	+	ENSG00000235919.5
ASMTL-AS1	chrX:1400530-1453794	TKS4_WT	TKS4_KO	896.556	1347.12	1.50249	0,585911602058889	50.2494	0.7786	0.108686	0.9999	+	ENSG00000236017.8_PAR_Y
ATP11A-AS1	chr13:112690033-112887168	TKS4_WT	TKS4_KO	0	93.3439	934.439	6,54602858307408	93343.9	1	0	1	-	ENSG00000232684.1
ATP1A1-AS1	chr1:116372985-116418622	TKS4_WT	TKS4_KO	2166.87	2823	1.30279	0,381001987282482	30.2787	0.777	0.109579	0.9999	-	ENSG00000203865.12
ATP2A1-AS1	chr16:28878487-28925238	TKS4_WT	TKS4_KO	1484.67	1209.84	0.814901	-0,296178190016266	-18.5099	0.8831	0.0539901	0.9999	-	ENSG00000260442.6
ATP2B1-AS1	chr12:89588048-89711952	TKS4_WT	TKS4_KO	991.579	1169.26	1.17917	0,236465310408715	17.9172	0.89615	0.0476193	0.9999	+	ENSG00000271614.1
ATP2C2-AS1	chr16:84368522-84467361	TKS4_WT	TKS4_KO	3106.57	3256.59	1.04829	0,0676195087712628	4.82896	0.93735	0.0280982	0.9999	-	ENSG00000261286.1
ATP6V0D1-DT	chr16:67481318-67505977	TKS4_WT	TKS4_KO	565.259	393.079	0.69545	-0,526275806970924	-30.455	0.5122	0.29056	0.9999	+	ENSG00000270049.4
ATP6V0E2-AS1	chr7:149867693-149880713	TKS4_WT	TKS4_KO	1873.24	1598.31	0.853241	-0,229668190588096	-14.6759	0.92065	0.0359054	0.9999	-	ENSG00000204934.10
ATP6V1B1-AS1	chr2:70935899-70965431	TKS4_WT	TKS4_KO	1157.23	962.397	0.831653	-0,26706782143275	-16.8347	0.8033	0.0951222	0.9999	-	ENSG00000239322.1
ATXN1-AS1	chr6:16299111-16766883	TKS4_WT	TKS4_KO	2120.56	3572.62	1.68472	0,751897371773183	68.4721	0.7867	0.104191	0.9999	+	ENSG00000229931.2
ATXN2-AS	chr12:111452213-111600255	TKS4_WT	TKS4_KO	32.188	61.8931	1.92	0,901445957296521	92.0004	1	0	1	+	ENSG00000258099.1
ATXN7L3-AS1	chr17:44186950-44223703	TKS4_WT	TKS4_KO	188.42	247.15	1.31153	0,384381854499694	31.1532	0.8794	0.0558135	0.9999	+	ENSG00000267394.2
B3GALT1-AS1	chr2:167293000-167941144	TKS4_WT	TKS4_KO	87.1474	0	0.00114617	-9,78377420614462	-99.8854	0.1208	0.917933	0.9999	-	ENSG00000235335.3
B3GALT5-AS1	chr21:39597146-39612822	TKS4_WT	TKS4_KO	307.755	412.963	1.34175	0,419899336995564	34.1745	0.6709	0.173342	0.9999	-	ENSG00000184809.13
B4GALT1-AS1	chr9:33104076-33179983	TKS4_WT	TKS4_KO	137.398	52.8229	0.384899	-1,38685907081462	-61.5101	1	0	1	+	ENSG00000233554.6
BAALC-AS1	chr8:103121031-103230305	TKS4_WT	TKS4_KO	96.564	23.336	0.242448	-2,05762255295121	-75.7552	1	0	1	-	ENSG00000247081.8
BACE1-AS	chr11:117232670-117316256	TKS4_WT	TKS4_KO	1523.88	1880.64	1.2341	0,302604704830732	23.4098	0.8951	0.0481284	0.9999	+	ENSG00000278768.3
BACH1-IT2	chr21:29372500-29373980	TKS4_WT	TKS4_KO	450.632	154.999	0.344105	-1,54195832602342	-65.5895	0.2859	0.543786	0.9999	+	ENSG00000228817.4
BAIAP2-DT	chr17:81029132-81034719	TKS4_WT	TKS4_KO	18280.7	20410.1	1.11648	0,158890087800776	11.6483	0.81035	0.0913274	0.9999	-	ENSG00000226137.5
BASP1-AS1	chr5:17130027-17276834	TKS4_WT	TKS4_KO	0	35.2153	353.153	5,14222144699377	35215.3	1	0	1	-	ENSG00000215196.5
BCAN-AS1	chr1:156637781-156661409	TKS4_WT	TKS4_KO	67636.3	108672	1.60671	0,684090621331926	60.671	0.27555	0.5598	0.9999	-	ENSG00000272068.1
BCAR3-AS1	chr1:93448066-93847219	TKS4_WT	TKS4_KO	289.692	200.478	0.692145	-0,535327992793773	-30.7855	1	0	1	+	ENSG00000224093.6
BCAR4	chr16:11819829-11828832	TKS4_WT	TKS4_KO	174.295	123.254	0.707325	-0,506980347527173	-29.2675	0.63235	0.199042	0.9999	-	ENSG00000262117.5
BCDIN3D-AS1	chr12:49791138-49843106	TKS4_WT	TKS4_KO	514.238	996.842	1.9383	0,95227057459672	93.8301	0.4513	0.345535	0.9999	+	ENSG00000258057.6
BCL2L1-AS1	chr20:31664451-31723963	TKS4_WT	TKS4_KO	32.188	93.3439	2.89408	1,49343879691515	189.408	1	0	1	+	ENSG00000236559.1
BCRP3	chr22:24632914-24659147	TKS4_WT	TKS4_KO	321.88	204.058	0.63407	-0,661311978395048	-36.593	0.6192	0.208169	0.9999	+	ENSG00000215481.9
BDNF-AS	chr11:27506851-27722030	TKS4_WT	TKS4_KO	601.385	799.944	1.33011	0,409393500163973	33.0115	0.71635	0.144875	0.9999	+	ENSG00000245573.9
BGLT3	chr11:5244553-5245546	TKS4_WT	TKS4_KO	275.567	272.872	0.990224	-0,0188760494176821	-0.977629	0.97885	0.00928385	0.9999	-	ENSG00000260629.2
BHLHE40-AS1	chr3:4896808-4985323	TKS4_WT	TKS4_KO	128.752	177.802	1.38067	0,455325953196821	38.0669	0.8528	0.0691528	0.9999	-	ENSG00000235831.7
BISPR	chr19:17405685-17425332	TKS4_WT	TKS4_KO	30906.7	41620.3	1.34664	0,429324530532832	34.6642	0.3952	0.403183	0.9999
BMP7-AS1	chr20:57168752-57267901	TKS4_WT	TKS4_KO	0	23.336	234.36	4,55065444994586	23336	1	0	1	+	ENSG00000235032.1
BMP8B-AS1	chr1:39738844-39788865	TKS4_WT	TKS4_KO	0	114.293	1143.93	6,83785496239568	114293	1	0	1	+	ENSG00000285905.1
BMS1P14	chr9:40463757-40584212	TKS4_WT	TKS4_KO	624.927	998.458	1.59762	0,673851817503692	59.7624	0.5502	0.259479	0.9999	-	ENSG00000276500.1
BOK-AS1	chr2:241544383-241583536	TKS4_WT	TKS4_KO	270.859	101.643	0.375492	-1,41792905058802	-62.4508	0.51125	0.291367	0.9999	-	ENSG00000234235.1
BPESC1	chr3:139104184-139125167	TKS4_WT	TKS4_KO	64.376	178.335	2.76746	1,44856561314723	176.746	1	0	1	+	ENSG00000232416.3
BRWD1-AS2	chr21:39184175-39323218	TKS4_WT	TKS4_KO	0	45.4787	455.787	5,51028787139273	45478.7	1	0	1	+	ENSG00000255568.3
BSG-AS1	chr19:567432-583493	TKS4_WT	TKS4_KO	1627.55	1049.76	0.645016	-0,633391058537885	-35.4984	0.64105	0.193108	0.9999	-	ENSG00000267751.6
BSN-DT	chr3:49549305-49554366	TKS4_WT	TKS4_KO	59.6677	44.2855	0.742634	-0,450840168540185	-25.7366	0.58455	0.233178	0.9999	-	ENSG00000226913.2
BTG3-AS1	chr21:17512905-17636213	TKS4_WT	TKS4_KO	1166.64	1235.16	1.05873	0,081219195718342	5.87277	0.96545	0.0152702	0.9999	+	ENSG00000280594.2
BVES-AS1	chr6:105137686-105180014	TKS4_WT	TKS4_KO	32.188	128.559	3.98473	1,95481878413265	298.473	1	0	1	+	ENSG00000203808.13
BZW1-AS1	chr2:200695722-200827338	TKS4_WT	TKS4_KO	96.564	22.1427	0.230103	-2,13301698324952	-76.9897	1	0	1	-	ENSG00000230408.3
C10orf55	chr10:73909181-73922777	TKS4_WT	TKS4_KO	404.319	1086.47	2.68674	1,4226514093201	168.674	0.4455	0.351152	0.9999	-	ENSG00000222047.9
C10orf95-AS1	chr10:102449816-102456293	TKS4_WT	TKS4_KO	12443.3	12379.1	0.994841	-0,00756699598974691	-0.515936	0.99135	0.00377299	0.9999	+	ENSG00000269609.6
C14orf178	chr14:77717598-77769742	TKS4_WT	TKS4_KO	87.1474	89.7641	1.02999	0,0278268691586059	2.99917	0.95755	0.0188385	0.9999	+	ENSG00000197734.10
C16orf95-DT	chr16:87317508-87318043	TKS4_WT	TKS4_KO	224.546	452.181	2.01331	1,00379769019916	101.331	0.48155	0.317359	0.9999	+	ENSG00000270006.3
C1orf220	chr1:178542795-178548889	TKS4_WT	TKS4_KO	188.42	134.05	0.711596	-0,497741611886258	-28.8404	0.74805	0.126069	0.9999	+	ENSG00000213057.5
C1RL-AS1	chr12:7094553-7130272	TKS4_WT	TKS4_KO	5842.64	7373.85	1.26207	0,335570331069315	26.2071	0.7878	0.103584	0.9999	+	ENSG00000205885.8
C21orf62-AS1	chr21:32772099-32813808	TKS4_WT	TKS4_KO	96.564	262.371	2.71529	1,42773721739959	171.529	0.4208	0.375924	0.9999	+	ENSG00000205930.10
C21orf91-OT1	chr21:17777403-18267371	TKS4_WT	TKS4_KO	27451.3	20030.9	0.72969	-0,454692579653512	-27.031	0.40045	0.397452	0.9999
C2CD4D-AS1	chr1:151837817-151853712	TKS4_WT	TKS4_KO	64.376	113.1	1.75569	0,79204094387338	75.5692	1	0	1	+	ENSG00000234614.1
C2orf27A	chr2:131682498-131767404	TKS4_WT	TKS4_KO	24547.7	23320.4	0.950004	-0,0740479064841728	-4.99963	0.892	0.0496351	0.9999
C2orf49-DT	chr2:105331541-105438529	TKS4_WT	TKS4_KO	13245.7	9308.87	0.702787	-0,508939548859298	-29.7213	0.81525	0.0887092	0.9999	-	ENSG00000272994.1
C3orf36	chr3:133928144-133929812	TKS4_WT	TKS4_KO	0	22.1427	222.427	4,47526001964755	22142.7	1	0	1	-	ENSG00000288547.3
C5orf34-AS1	chr5:43444251-43519854	TKS4_WT	TKS4_KO	124.044	152.85	1.23204	0,290624272711235	23.2037	0.9165	0.0378675	0.9999	+	ENSG00000248554.1
C6orf223	chr6:43995722-44074652	TKS4_WT	TKS4_KO	12285.7	26167	2.12987	1,09065656062267	112.987	0.1454	0.837436	0.9999	+	ENSG00000181577.16
C8orf44	chr8:66667595-66862022	TKS4_WT	TKS4_KO	32673.2	24724.7	0.756728	-0,402193062284325	-24.3272	0.47555	0.322804	0.9999
C8orf86	chr8:38510833-38528662	TKS4_WT	TKS4_KO	27.4797	0	0.00362586	-8,1537901390709	-99.6374	1	0	1	-	ENSG00000196166.5
C9orf163	chr9:136440095-136486067	TKS4_WT	TKS4_KO	1508.98	1053.72	0.69832	-0,518900975502942	-30.168	0.8004	0.0966929	0.9999	+	ENSG00000196366.3
CA3-AS1	chr8:85438858-85481493	TKS4_WT	TKS4_KO	82.439	121.638	1.47491	0,544985796826758	47.4915	1	0	1	-	ENSG00000253549.6
CACNA1C-AS2	chr12:1941590-2697950	TKS4_WT	TKS4_KO	0	23.336	234.36	4,55065444994586	23336	1	0	1	-	ENSG00000256271.1
CACNA1C-IT1	chr12:1941590-2697950	TKS4_WT	TKS4_KO	64.376	136.436	2.11763	1,06244837768269	111.763	1	0	1	+	ENSG00000256837.1
CACTIN-AS1	chr19:3594506-3626810	TKS4_WT	TKS4_KO	725.429	1128.32	1.55531	0,635410438268785	55.5307	0.75	0.124939	0.9999	+	ENSG00000226800.5
CAHM	chr6:163413064-163413950	TKS4_WT	TKS4_KO	27.4797	90.9574	3.30161	1,67684231677456	230.161	1	0	1	-	ENSG00000270419.1
CALML3-AS1	chr10:5514243-5526771	TKS4_WT	TKS4_KO	0	44.2855	443.855	5,47201654410515	44285.5	1	0	1	-	ENSG00000205488.9
CAMTA1-DT	chr1:6783891-6784980	TKS4_WT	TKS4_KO	54.9594	86.4223	1.57144	0,628691522676109	57.1436	0.64245	0.192161	0.9999	-	ENSG00000237436.1
CAMTA2-AS1	chr17:4967992-5053398	TKS4_WT	TKS4_KO	743.492	1169.69	1.57316	0,651921309898352	57.3161	0.68395	0.164976	0.9999	+	ENSG00000262678.1
CAPN10-DT	chr2:240582749-240586316	TKS4_WT	TKS4_KO	2722.71	4211.88	1.54692	0,628925481651625	54.6924	0.382	0.417937	0.9999	-	ENSG00000260942.1
CARD8-AS1	chr19:48203147-48258194	TKS4_WT	TKS4_KO	957.851	696.997	0.727696	-0,459947227135205	-27.2304	0.86255	0.0642157	0.9999	+	ENSG00000268001.1
CARMAL	chr15:89041027-89082880	TKS4_WT	TKS4_KO	188.42	66.4282	0.352897	-1,50955076096335	-64.7103	0.4683	0.329476	0.9999	+	ENSG00000260123.2
CARNMT1-AS1	chr9:74952964-75028456	TKS4_WT	TKS4_KO	0	44.2855	443.855	5,47201654410515	44285.5	1	0	1	+	ENSG00000203321.2
CARS1-AS1	chr11:3000928-3057423	TKS4_WT	TKS4_KO	0	70.0079	701.079	6,1315051161369	70007.9	1	0	1	+	ENSG00000247473.2
CASC11	chr8:127700607-127733967	TKS4_WT	TKS4_KO	87.1474	169.503	1.94393	0,944171767562706	94.3932	0.64935	0.187521	0.9999	-	ENSG00000249375.8
CASC15	chr6:21666412-22195820	TKS4_WT	TKS4_KO	0	45.4787	455.787	5,51028787139273	45478.7	1	0	1	+	ENSG00000272168.9
CASC18	chr12:105704202-105767003	TKS4_WT	TKS4_KO	27.4797	76.1589	2.76504	1,42097177169717	176.504	1	0	1	+	ENSG00000257859.2
CASC2	chr10:118004915-118210153	TKS4_WT	TKS4_KO	2729.05	1821.87	0.667596	-0,583428169528411	-33.2404	0.66075	0.179963	0.9999	+	ENSG00000177640.16
CASC23	chr11:8011277-8016509	TKS4_WT	TKS4_KO	54.9594	0	0.00181622	-9,12823668369867	-99.8184	1	0	1	-	ENSG00000255420.2
CASC8	chr8:127244636-127482139	TKS4_WT	TKS4_KO	884.828	1250.29	1.41299	0,497279640555261	41.2985	0.6142	0.21169	0.9999	-	ENSG00000246228.7
CASC9	chr8:75223116-75278889	TKS4_WT	TKS4_KO	1142.33	785.863	0.687975	-0,540708566690138	-31.2025	0.50625	0.295635	0.9999	-	ENSG00000249395.4
CATIP-AS1	chr2:218270484-218368393	TKS4_WT	TKS4_KO	124.044	386.285	3.11239	1,62760325365945	211.239	0.4457	0.350957	0.9999	-	ENSG00000225062.1
CATIP-AS2	chr2:218270484-218368393	TKS4_WT	TKS4_KO	0	22.1427	222.427	4,47526001964755	22142.7	1	0	1	-	ENSG00000237281.1
CAVIN2-AS1	chr2:191948299-192194933	TKS4_WT	TKS4_KO	0	115.909	1160.09	6,85809292402149	115909	1	0	1	+	ENSG00000233766.8
CBR3-AS1	chr21:36130471-36156308	TKS4_WT	TKS4_KO	624.927	461.893	0.739157	-0,438123417287174	-26.0843	0.8165	0.0880438	0.9999	-	ENSG00000236830.8
CCAT2	chr8:127244636-127482139	TKS4_WT	TKS4_KO	59.6677	70.0079	1.17301	0,208648403491563	17.3006	0.84045	0.0754881	0.9999	+	ENSG00000280997.1
CCDC144NL-AS1	chr17:20863394-20930041	TKS4_WT	TKS4_KO	445.153	135.243	0.303969	-1,72091826818321	-69.6031	0.26265	0.580623	0.9999	+	ENSG00000233098.10
CCDC15-DT	chr11:124950382-124954058	TKS4_WT	TKS4_KO	439.675	246.084	0.559795	-0,839978052008964	-44.0205	0.7334	0.134659	0.9999	-	ENSG00000285825.2
CCDC183-AS1	chr9:136796337-136841187	TKS4_WT	TKS4_KO	924.035	777.325	0.841246	-0,250804451250842	-15.8754	0.90135	0.0451065	0.9999	-	ENSG00000228544.1
CCDC18-AS1	chr1:93310108-93345811	TKS4_WT	TKS4_KO	7466.25	10888.7	1.45838	0,544196032925823	45.8383	0.40855	0.388755	0.9999	-	ENSG00000223745.8
CCDC26	chr8:129351693-129680239	TKS4_WT	TKS4_KO	32.188	39.7504	1.23422	0,263932514126617	23.4217	1	0	1	-	ENSG00000229140.11
CCDC28A-AS1	chr6:138725214-138773703	TKS4_WT	TKS4_KO	1376.29	966.787	0.70248	-0,510413166017957	-29.752	0.539	0.268411	0.9999	-	ENSG00000279968.3
CCNT2-AS1	chr2:134838318-134918606	TKS4_WT	TKS4_KO	840.056	949.417	1.13017	0,174991967798381	13.0167	0.8509	0.0701215	0.9999	-	ENSG00000224043.8
CD27-AS1	chr12:6438474-6472006	TKS4_WT	TKS4_KO	1015.89	899.073	0.885022	-0,177493006380685	-11.4978	0.93535	0.0290258	0.9999	-	ENSG00000215039.8
CD2BP2-DT	chr16:30355370-30370494	TKS4_WT	TKS4_KO	348.589	416.12	1.19367	0,251686500014131	19.3671	0.8596	0.0657036	0.9999	+	ENSG00000260219.3
CD81-AS1	chr11:2328748-2397402	TKS4_WT	TKS4_KO	27.4797	46.6719	1.69588	0,715708086792329	69.5881	1	0	1	-	ENSG00000238184.1
CDC37L1-DT	chr9:4676599-4679480	TKS4_WT	TKS4_KO	27.4797	74.9657	2.72177	1,39821989394645	172.177	1	0	1	-	ENSG00000273061.2
CDC42-AS1	chr1:22023993-22101360	TKS4_WT	TKS4_KO	96.564	0	0.00103451	-9,93020509778443	-99.8965	1	0	1	-	ENSG00000285752.1
CDK6-AS1	chr7:92604920-92917187	TKS4_WT	TKS4_KO	701.117	52.8229	0.0754729	-3,72974743585297	-92.4527	0.2649	0.576918	0.9999	+	ENSG00000237819.6
CDKN2B-AS1	chr9:21967138-22121097	TKS4_WT	TKS4_KO	963.329	962.287	0.998918	-0,00290827991067371	-0.108155	0.99465	0.00232971	0.9999	+	ENSG00000240498.9
CEACAM16-AS1	chr19:44612576-44725208	TKS4_WT	TKS4_KO	183.711	198.219	1.07893	0,102553116976382	7.89289	0.9503	0.0221393	0.9999	-	ENSG00000266903.2
CEBPA-DT	chr19:33302820-33305057	TKS4_WT	TKS4_KO	1413.96	2126.43	1.50385	0,587739938330595	50.3847	0.43545	0.361062	0.9999	+	ENSG00000267296.2
CEBPB-AS1	chr20:50184602-50192690	TKS4_WT	TKS4_KO	3087.74	3780.74	1.22443	0,291688362986476	22.4429	0.88905	0.0510738	0.9999	-	ENSG00000277449.1
CECR3	chr22:17256858-17266733	TKS4_WT	TKS4_KO	32.188	0	0.00309713	-8,37451788104629	-99.6903	1	0	1	-	ENSG00000241832.1
CELF2-AS1	chr10:10462514-11344674	TKS4_WT	TKS4_KO	0	23.336	234.36	4,55065444994586	23336	1	0	1	-	ENSG00000181800.6
CENATAC-DT	chr11:118996653-118998030	TKS4_WT	TKS4_KO	807.868	1019.64	1.2621	0,33422516743431	26.2104	0.65595	0.183129	0.9999	-	ENSG00000255121.2
CENPN-AS1	chr16:81007213-81047350	TKS4_WT	TKS4_KO	32.188	17.6076	0.548427	-0,906293001639695	-45.1573	1	0	1	-	ENSG00000260213.6
CEP250-AS1	chr20:35455136-35519280	TKS4_WT	TKS4_KO	59.6677	0	0.00167314	-9,2447848075327	-99.8327	0.06115	1.2136	0.9999	-	ENSG00000230155.7
CEP83-DT	chr12:94148576-94462570	TKS4_WT	TKS4_KO	188.42	556.853	2.95434	1,55596692045608	195.434	0.4744	0.323855	0.9999	+	ENSG00000278916.1
CERNA1	chr15:52115099-52304528	TKS4_WT	TKS4_KO	248.087	248.343	1.00103	-0,00373483458372153	0.103148	0.97605	0.0105279	0.9999	+	ENSG00000259577.2
CERNA3	chr8:56074591-56075274	TKS4_WT	TKS4_KO	27.4797	0	0.00362586	-8,1537901390709	-99.6374	1	0	1	+	ENSG00000253603.1
CEROX1	chr16:853633-981613	TKS4_WT	TKS4_KO	9452.49	18752.4	1.98385	0,988164001204371	98.3848	0.16485	0.782911	0.9999
CERS6-AS1	chr2:168422616-168786429	TKS4_WT	TKS4_KO	1329.98	1130.83	0.850272	-0,234979257630041	-14.9728	0.8914	0.0499274	0.9999	-	ENSG00000227617.9
CFAP20DC-AS1	chr3:58716416-59050045	TKS4_WT	TKS4_KO	27.4797	0	0.00362586	-8,1537901390709	-99.6374	1	0	1	+	ENSG00000242428.6
CFAP58-DT	chr10:104351300-104353575	TKS4_WT	TKS4_KO	128.752	23.336	0.181883	-2,46895851631448	-81.8117	1	0	1	-	ENSG00000231233.2
CFAP61-AS1	chr20:20034360-20360714	TKS4_WT	TKS4_KO	349.36	88.5709	0.253737	-1,98230545040974	-74.6263	0.5967	0.224244	0.9999	-	ENSG00000243810.1
CFLAR-AS1	chr2:201116163-201176687	TKS4_WT	TKS4_KO	0	22.1427	222.427	4,47526001964755	22142.7	1	0	1	-	ENSG00000226312.7
CH17-340M24.3	chrX:154424379-154428479	TKS4_WT	TKS4_KO	288.922	697.292	2.41294	1,26630500177822	141.294	0.23995	0.619879	0.9999	-	ENSG00000197180.3
CH507-42P11.6	chr21:6084363-6095783	TKS4_WT	TKS4_KO	32.188	68.8147	2.13437	1,05415006168807	113.437	0.6425	0.192127	0.9999	-	ENSG00000280179.1
CHASERR	chr15:92882842-92898747	TKS4_WT	TKS4_KO	24714.5	29358.9	1.18792	0,248386736418975	18.7921	0.6635	0.178159	0.9999	+	ENSG00000272888.8
CHKB-DT	chr22:50583025-50595281	TKS4_WT	TKS4_KO	1141.56	1118.99	0.980231	-0,0299438623582354	-1.97695	0.97955	0.00897339	0.9999	+	ENSG00000205559.5
CHN2-AS1	chr7:28979966-29563796	TKS4_WT	TKS4_KO	27.4797	90.9574	3.30161	1,67684231677456	230.161	1	0	1	-	ENSG00000235669.1
CHROMR	chr2:178413658-178516463	TKS4_WT	TKS4_KO	6683.55	4826.97	0.722221	-0,469682693951028	-27.7779	0.66095	0.179831	0.9999	+	ENSG00000223960.8
CIRBP-AS1	chr19:1267470-1274880	TKS4_WT	TKS4_KO	1033.18	806.151	0.780283	-0,359186360010135	-21.9717	0.84205	0.0746621	0.9999	-	ENSG00000267493.4
CKMT2-AS1	chr5:81233321-81301569	TKS4_WT	TKS4_KO	4268.59	3679.26	0.861941	-0,214642696464774	-13.8059	0.7491	0.12546	0.9999	-	ENSG00000247572.9
CLASP1-AS1	chr2:121337775-121649462	TKS4_WT	TKS4_KO	146.815	67.6214	0.460956	-1,12610897561433	-53.9044	0.6086	0.215668	0.9999	+	ENSG00000265451.1
CLCA4-AS1	chr1:86547077-86704493	TKS4_WT	TKS4_KO	142.107	92.1506	0.648706	-0,633464042785479	-35.1294	0.69835	0.155927	0.9999	-	ENSG00000236915.2
CLEC12A-AS1	chr12:9948136-10001894	TKS4_WT	TKS4_KO	27.4797	22.1427	0.806488	-0,356602024535981	-19.3512	0.2404	0.619066	0.9999	-	ENSG00000231560.1
CLSTN2-AS1	chr3:139935184-140577397	TKS4_WT	TKS4_KO	0	44.2855	443.855	5,47201654410515	44285.5	1	0	1	-	ENSG00000250433.1
CNIH3-AS2	chr1:224385145-224740554	TKS4_WT	TKS4_KO	0	23.336	234.36	4,55065444994586	23336	1	0	1	-	ENSG00000233384.3
CNN3-DT	chr1:94896956-94963270	TKS4_WT	TKS4_KO	280.275	308.087	1.0992	0,131824676922311	9.91957	0.9486	0.0229169	0.9999	+	ENSG00000235501.7
CNNM3-DT	chr2:96812238-96813657	TKS4_WT	TKS4_KO	164.878	35.2153	0.214061	-2,23175730059035	-78.5939	0.2213	0.655019	0.9999	-	ENSG00000273265.1
COA6-AS1	chr1:234372806-234385080	TKS4_WT	TKS4_KO	861.287	637.988	0.740768	-0,434412727141273	-25.9232	0.79835	0.0978067	0.9999	-	ENSG00000231663.2
COL18A1-AS1	chr21:45403805-45563140	TKS4_WT	TKS4_KO	59.6677	66.4282	1.11311	0,133037382650733	11.3113	1	0	1	-	ENSG00000183535.9
COL18A1-AS2	chr21:45403805-45563140	TKS4_WT	TKS4_KO	0	23.336	234.36	4,55065444994586	23336	1	0	1	-	ENSG00000224574.1
COMETT	chr7:116563593-116798386	TKS4_WT	TKS4_KO	109.919	23.336	0.213018	-2,2427082546335	-78.6982	1	0	1	-	ENSG00000231210.3
COPG2IT1	chr7:130486174-130687432	TKS4_WT	TKS4_KO	1566.25	1183.24	0.755476	-0,405370678040981	-24.4524	0.8606	0.0651987	0.9999	+	ENSG00000286214.1
COQ7-DT	chr16:18983933-19080095	TKS4_WT	TKS4_KO	114.627	0	0.000871634	-10,1752626048002	-99.9128	0.0187	1.72816	0.9999	-	ENSG00000261465.7
CORO1A-AS1	chr16:30183392-30189254	TKS4_WT	TKS4_KO	142.107	22.1427	0.156411	-2,68569041255019	-84.3589	0.4582	0.338945	0.9999	-	ENSG00000261416.1
COSMOC	chr18:36129898-36187435	TKS4_WT	TKS4_KO	233.962	588.964	2.5167	1,32599693590112	151.67	0.4135	0.383524	0.9999	-	ENSG00000260552.2
CPB2-AS1	chr13:46052847-46105033	TKS4_WT	TKS4_KO	578.614	424.952	0.734477	-0,447453093746338	-26.5523	0.66725	0.175711	0.9999	+	ENSG00000235903.10
CPNE8-AS1	chr12:38652199-38909592	TKS4_WT	TKS4_KO	588.03	509.886	0.867131	-0,207883470957764	-13.2869	0.92415	0.0342575	0.9999	+	ENSG00000257718.1
CPS1-IT1	chr2:210477684-210679107	TKS4_WT	TKS4_KO	522.884	327.844	0.627063	-0,675797921142044	-37.2937	0.7194	0.14303	0.9999	+	ENSG00000280837.1
CRIM1-DT	chr2:36354748-36355570	TKS4_WT	TKS4_KO	798.451	1140.53	1.42837	0,512749367234196	42.8375	0.5509	0.258927	0.9999	-	ENSG00000260025.1
CRNDE	chr16:54918862-54928886	TKS4_WT	TKS4_KO	3407.39	2819.88	0.827583	-0,273405492553593	-17.2417	0.72195	0.141493	0.9999	-	ENSG00000245694.11
CRTC3-AS1	chr15:90529914-90717140	TKS4_WT	TKS4_KO	27.4797	44.2855	1.60935	0,640154499921615	60.9354	1	0	1	-	ENSG00000259736.1
CSNK1G2-AS1	chr19:1941148-1981338	TKS4_WT	TKS4_KO	64.376	46.6719	0.725416	-0,483119073095278	-27.4584	1	0	1	-	ENSG00000180846.8
CSRP3-AS1	chr11:19182029-19312856	TKS4_WT	TKS4_KO	225.316	244.763	1.08627	0,113636208775733	8.62716	1	0	1	+	ENSG00000255308.1
CSTF3-DT	chr11:33161656-33191598	TKS4_WT	TKS4_KO	409.027	89.7641	0.219648	-2,18990212270804	-78.0352	0.3325	0.478208	0.9999	+	ENSG00000247151.7
CT62	chr15:71110243-71115504	TKS4_WT	TKS4_KO	0	67.6214	677.214	6,08153989316787	67621.4	1	0	1	-	ENSG00000225362.10
CT69	chr6:134429029-134504020	TKS4_WT	TKS4_KO	0	44.2855	443.855	5,47201654410515	44285.5	1	0	1	-	ENSG00000231971.6
CT70	chr9:104970425-104991865	TKS4_WT	TKS4_KO	0	22.1427	222.427	4,47526001964755	22142.7	1	0	1	-	ENSG00000230013.2
CTB-178M22.2	chr5:166979065-168264159	TKS4_WT	TKS4_KO	32.188	0	0.00309713	-8,37451788104629	-99.6903	1	0	1	-	ENSG00000253978.2
CTBP1-AS	chr4:1210119-1253007	TKS4_WT	TKS4_KO	633.573	953.565	1.50498	0,587696432167146	50.498	0.725	0.139662	0.9999	+	ENSG00000280927.1
CTBP1-DT	chr4:1210119-1253007	TKS4_WT	TKS4_KO	9016.84	9221.49	1.0227	0,0322336106556902	2.26962	0.98585	0.00618916	0.9999	+	ENSG00000196810.5
CTC-338M12.4	chr5:181246540-181272307	TKS4_WT	TKS4_KO	1979.22	2148.39	1.08547	0,117662341352915	8.54687	0.8896	0.0508052	0.9999	+	ENSG00000233937.8
CTD-2194D22.4	chr5:1887330-1900493	TKS4_WT	TKS4_KO	54.9594	0	0.00181622	-9,12823668369867	-99.8184	1	0	1	+	ENSG00000249326.1
CTD-3080P12.3	chr5:1173095-1178605	TKS4_WT	TKS4_KO	0	22.1427	222.427	4,47526001964755	22142.7	1	0	1	-	ENSG00000249201.2
CXXC4-AS1	chr4:104468307-104697592	TKS4_WT	TKS4_KO	0	22.1427	222.427	4,47526001964755	22142.7	1	0	1	+	ENSG00000245384.2
CXXC5-AS1	chr5:139647298-139683882	TKS4_WT	TKS4_KO	0	70.4306	705.306	6,14017740758035	70430.6	1	0	1	-	ENSG00000250635.1
CYB561D2	chr3:50350861-50504244	TKS4_WT	TKS4_KO	13077	11116.1	0.850051	-0,234478231889949	-14.9949	0.8728	0.0590853	0.9999	+	ENSG00000271858.5
CYP1B1-AS1	chr2:38112983-38181855	TKS4_WT	TKS4_KO	0	22.1427	222.427	4,47526001964755	22142.7	1	0	1	+	ENSG00000232973.14
CYP2U1-AS1	chr4:107823644-107989722	TKS4_WT	TKS4_KO	32.188	67.6214	2.09742	1,02895010700894	109.742	1	0	1	-	ENSG00000245293.4
CYP4F26P	chr9:33580694-33605293	TKS4_WT	TKS4_KO	1057.5	1343.91	1.27081	0,344522603069339	27.0811	0.6619	0.179208	0.9999	+	ENSG00000226562.4
CYP51A1-AS1	chr7:91940861-92180725	TKS4_WT	TKS4_KO	224.546	85.2291	0.379838	-1,4023119639311	-62.0162	0.5158	0.287519	0.9999	+	ENSG00000188693.8
CYTOR	chr2:87439522-87521518	TKS4_WT	TKS4_KO	19637.5	16489.8	0.839711	-0,252102090138061	-16.0289	0.7086	0.149599	0.9999	+	ENSG00000222041.12
DACT3-AS1	chr19:46647550-46719412	TKS4_WT	TKS4_KO	0	70.4306	705.306	6,14017740758035	70430.6	1	0	1	+	ENSG00000245598.7
DANCR	chr4:52712393-52720697	TKS4_WT	TKS4_KO	84136.2	62529.3	0.743192	-0,428209133534532	-25.6808	0.45225	0.344621	0.9999	+	ENSG00000226950.8
DANT1	chrX:115840395-115969111	TKS4_WT	TKS4_KO	64.376	22.1427	0.344976	-1,55542918442359	-65.5024	1	0	1	+	ENSG00000229335.2
DANT2	chrX:115840395-115969111	TKS4_WT	TKS4_KO	6484.09	5733.75	0.884282	-0,177622432775279	-11.5718	0.78535	0.104937	0.9999	-	ENSG00000235244.5
DARS1-AS1	chr2:135905880-136007542	TKS4_WT	TKS4_KO	54.9594	192.068	3.49019	1,77991571811088	249.019	0.46335	0.334091	0.9999	+	ENSG00000231890.9
DBH-AS1	chr9:133636362-133659329	TKS4_WT	TKS4_KO	381.548	1333.99	3.4956	1,80214331084512	249.56	0.14655	0.834014	0.9999	-	ENSG00000225756.1
DCST1-AS1	chr1:155033805-155069553	TKS4_WT	TKS4_KO	1601.61	1820.01	1.13635	0,183602259649022	13.6354	0.89635	0.0475224	0.9999	-	ENSG00000232093.1
DCTN1-AS1	chr2:74361153-74398668	TKS4_WT	TKS4_KO	32.188	0	0.00309713	-8,37451788104629	-99.6903	1	0	1	+	ENSG00000237737.6
DCXR-DT	chr17:82037917-82039380	TKS4_WT	TKS4_KO	114.627	185.147	1.61468	0,679971858721326	61.4677	0.67135	0.173051	0.9999	+	ENSG00000264569.2
DDN-AS1	chr12:48995148-49060884	TKS4_WT	TKS4_KO	6587.76	7062.14	1.07201	0,100118873245436	7.20082	0.9424	0.0257647	0.9999	+	ENSG00000257913.3
DDX11-AS1	chr12:31020762-31073847	TKS4_WT	TKS4_KO	1598.44	1414.82	0.885133	-0,176846388508672	-11.4867	0.81405	0.0893489	0.9999	-	ENSG00000245614.5
DDX19A-DT	chr16:70289766-70346747	TKS4_WT	TKS4_KO	1252.25	854.347	0.682275	-0,552611322429262	-31.7725	0.8243	0.0839147	0.9999	-	ENSG00000261777.6
DDX39B-AS1	chr6:31528961-31546848	TKS4_WT	TKS4_KO	59.6677	92.1506	1.54349	0,604629676766927	54.3486	0.73775	0.132091	0.9999	+	ENSG00000234006.1
DDX59-AS1	chr1:200640804-200694250	TKS4_WT	TKS4_KO	274.797	539.796	1.96399	0,969074764211185	96.3994	0.7182	0.143755	0.9999	+	ENSG00000260088.1
DENND5B-AS1	chr12:31382222-31616583	TKS4_WT	TKS4_KO	0	68.8147	689.147	6,106739847847	68814.7	1	0	1	+	ENSG00000255867.1
DENND6A-DT	chr3:57693204-57696651	TKS4_WT	TKS4_KO	32.188	176.609	5.4729	2,41264192355462	447.29	1	0	1	+	ENSG00000241933.1
DEPDC1-AS1	chr1:68474151-68538627	TKS4_WT	TKS4_KO	453.8	354.759	0.7818	-0,3579863575254	-21.82	0.84895	0.0711179	0.9999	+	ENSG00000234264.1
DGCR11	chr22:19036281-19122454	TKS4_WT	TKS4_KO	3020.28	2829.17	0.936727	-0,0947300322969452	-6.32735	0.9633	0.0162384	0.9999	-	ENSG00000273311.1
DGUOK-AS1	chr2:73926826-73981439	TKS4_WT	TKS4_KO	1567.88	1651.63	1.05341	0,0742428678027972	5.34127	0.9683	0.0139901	0.9999	-	ENSG00000237883.3
DHCR24-DT	chr1:54887523-54890272	TKS4_WT	TKS4_KO	931.141	829.008	0.890326	-0,168988160074718	-10.9674	0.84465	0.0733232	0.9999	+	ENSG00000233203.6
DHDDS-AS1	chr1:26432320-26471306	TKS4_WT	TKS4_KO	109.919	45.4787	0.41428	-1,28307483318662	-58.572	1	0	1	-	ENSG00000225891.2
DHRS4-AS1	chr14:23938730-23969279	TKS4_WT	TKS4_KO	15518.4	15437.5	0.994787	-0,00762430009405913	-0.521313	0.9923	0.00335701	0.9999	-	ENSG00000215256.5
DIAPH2-AS1	chrX:96684841-97604997	TKS4_WT	TKS4_KO	96.564	46.6719	0.483861	-1,06070687192121	-51.6139	1	0	1	-	ENSG00000236256.9
DICER1-AS1	chr14:95086227-95179933	TKS4_WT	TKS4_KO	119.335	540.439	4.5258	2,16734239428036	352.58	0.2735	0.563043	0.9999	+	ENSG00000235706.9
DINOL	chr6:36676462-36687332	TKS4_WT	TKS4_KO	0	139.245	1393.45	7,1225174261266	139245	0.0294	1.53165	0.9999	-	ENSG00000285244.1
DIO3OS	chr14:101552220-101560422	TKS4_WT	TKS4_KO	64.376	234.738	3.64225	1,84483286082875	264.225	0.2763	0.558619	0.9999
DIP2C-AS1	chr10:274200-689710	TKS4_WT	TKS4_KO	257.504	159.772	0.620611	-0,693269317297559	-37.9389	1	0	1	+	ENSG00000180525.14
DIRC3	chr2:217282732-217756593	TKS4_WT	TKS4_KO	114.627	52.8229	0.461294	-1,12751429632301	-53.8706	0.4706	0.327348	0.9999	-	ENSG00000231672.8
DIS3L-AS1	chr15:66278501-66333898	TKS4_WT	TKS4_KO	32.188	114.716	3.556	1,79059010409824	255.6	1	0	1	-	ENSG00000261318.1
DKFZP434A062	chr9:136322301-136327323	TKS4_WT	TKS4_KO	248.087	92.1506	0.371698	-1,43301952878609	-62.8302	0.39215	0.406548	0.9999	-	ENSG00000262075.3
DLEU1	chr13:49982548-50528643	TKS4_WT	TKS4_KO	18683.3	15608.6	0.835431	-0,259476129981498	-16.4569	0.88905	0.0510738	0.9999	+	ENSG00000176124.15
DLEU2	chr13:49982548-50528643	TKS4_WT	TKS4_KO	18842	15087.1	0.800718	-0,320703591039292	-19.9282	0.7984	0.0977795	0.9999
DLEU2L	chr1:63440769-63585401	TKS4_WT	TKS4_KO	441.215	298.247	0.676041	-0,567756692336732	-32.3959	0.81665	0.087964	0.9999	+	ENSG00000116652.6
DLG1-AS1	chr3:197042559-197303751	TKS4_WT	TKS4_KO	335.235	108.565	0.324049	-1,62958257174968	-67.5951	0.42555	0.371049	0.9999	+	ENSG00000227375.6
DLG2-AS2	chr11:83455008-85628535	TKS4_WT	TKS4_KO	32.188	0	0.00309713	-8,37451788104629	-99.6903	1	0	1	+	ENSG00000255311.5
DLG5-AS1	chr10:77926811-77929825	TKS4_WT	TKS4_KO	454.57	351.18	0.772604	-0,375051306862586	-22.7396	0.7103	0.148558	0.9999	+	ENSG00000233871.2
DLGAP1-AS1	chr18:3496031-4455441	TKS4_WT	TKS4_KO	4119.38	5151.45	1.25053	0,322229180775736	25.0534	0.7778	0.109132	0.9999	+	ENSG00000177337.9
DLGAP1-AS2	chr18:3496031-4455441	TKS4_WT	TKS4_KO	3059.57	3187.99	1.04197	0,0588919920803896	4.19718	0.9687	0.0138107	0.9999	+	ENSG00000262001.2
DLGAP4-AS1	chr20:36306338-36573275	TKS4_WT	TKS4_KO	82.439	66.4282	0.806021	-0,326755867136341	-19.3979	1	0	1	-	ENSG00000232907.9
DM1-AS	chr19:45764784-45782490	TKS4_WT	TKS4_KO	64.376	23.336	0.363484	-1,48003475412528	-63.6516	1	0	1	+	ENSG00000267395.5
DNAAF3-AS1	chr19:55158660-55166722	TKS4_WT	TKS4_KO	91.8557	22.1427	0.241885	-2,06165854877509	-75.8115	0.44715	0.349547	0.9999	+	ENSG00000267577.1
DNAH17-AS1	chr17:78378622-78577436	TKS4_WT	TKS4_KO	721.491	1166.16	1.61623	0,690837930073169	61.6234	0.77025	0.113368	0.9999	+	ENSG00000267432.6
DNAJB5-DT	chr9:34985409-34989379	TKS4_WT	TKS4_KO	96.564	23.336	0.242448	-2,05762255295121	-75.7552	1	0	1	-	ENSG00000281491.1
DNAJB8-AS1	chr3:128462433-128472317	TKS4_WT	TKS4_KO	160.94	0	0.000620964	-10,6612436673006	-99.9379	1	0	1	+	ENSG00000242049.1
DNAJC27-AS1	chr2:24972111-25039694	TKS4_WT	TKS4_KO	445.924	946.405	2.12209	1,082580606997	112.209	0.36525	0.43741	0.9999	+	ENSG00000224165.7
DNAJC3-DT	chr13:95672834-95676925	TKS4_WT	TKS4_KO	1239.67	1205.87	0.972737	-0,0409254119439546	-2.72631	0.95875	0.0182946	0.9999	-	ENSG00000247400.5
DNAJC9-AS1	chr10:73247366-73361064	TKS4_WT	TKS4_KO	1306.44	1105.24	0.846005	-0,242254533470335	-15.3995	0.8821	0.0544822	0.9999	+	ENSG00000236756.4
DNM1P35	chr15:75722895-75740077	TKS4_WT	TKS4_KO	887.139	880.272	0.99226	-0,0126722247443116	-0.773974	0.58735	0.231103	0.9999	-	ENSG00000246877.2
DNM3-IT1	chr1:171841494-172468829	TKS4_WT	TKS4_KO	32.188	0	0.00309713	-8,37451788104629	-99.6903	1	0	1	+	ENSG00000233540.1
DNMBP-AS1	chr10:99875570-100009948	TKS4_WT	TKS4_KO	412.965	433.837	1.05053	0,0679768083978701	5.05296	0.9679	0.0141695	0.9999	+	ENSG00000227695.6
DOCK9-DT	chr13:99086722-99088625	TKS4_WT	TKS4_KO	293.63	288.331	0.98196	-0,0306781058946707	-1.80404	0.98125	0.00822033	0.9999	+	ENSG00000260992.1
DPH6-DT	chr15:35546194-35859001	TKS4_WT	TKS4_KO	59.6677	67.6214	1.13308	0,158683180522538	13.3077	0.90105	0.0452511	0.9999	+	ENSG00000248079.3
DPP4-DT	chr2:162074856-162077932	TKS4_WT	TKS4_KO	64.376	22.1427	0.344976	-1,55542918442359	-65.5024	1	0	1	+	ENSG00000230918.3
DPP9-AS1	chr19:4675225-4725174	TKS4_WT	TKS4_KO	201.774	475.204	2.35446	1,22897786335072	135.446	0.5203	0.283746	0.9999	+	ENSG00000205790.1
DPY19L3-DT	chr19:32390049-32405539	TKS4_WT	TKS4_KO	853.41	609.015	0.713659	-0,488213899891494	-28.6341	0.55865	0.25286	0.9999	-	ENSG00000267213.4
DRAIC	chr15:69561719-69571440	TKS4_WT	TKS4_KO	91.8557	0	0.00108748	-9,85884666331001	-99.8913	0.0127	1.8962	0.9999	+	ENSG00000245750.10
DSCR9	chr21:37208502-37221736	TKS4_WT	TKS4_KO	293.63	404.958	1.37901	0,459224164533994	37.9015	0.70525	0.151657	0.9999	+	ENSG00000230366.9
DSG2-AS1	chr18:31498176-31556911	TKS4_WT	TKS4_KO	0	136.436	1365.36	7,09313758175383	136436	1	0	1	-	ENSG00000264859.6
DST-AS1	chr6:56457995-56954830	TKS4_WT	TKS4_KO	32.188	203.525	6.30652	2,61718110236659	530.652	0.3756	0.425274	0.9999	+	ENSG00000231441.2
DTD1-AS1	chr20:18588053-18766644	TKS4_WT	TKS4_KO	0	98.3016	984.016	6,62060986871711	98301.6	0.11045	0.956834	0.9999	-	ENSG00000233993.1
DTNB-AS1	chr2:25377242-25673647	TKS4_WT	TKS4_KO	0	67.6214	677.214	6,08153989316787	67621.4	1	0	1	+	ENSG00000224220.1
DUBR	chr3:107240691-107326964	TKS4_WT	TKS4_KO	3976.59	3504.16	0.8812	-0,18278475419213	-11.88	0.7768	0.109691	0.9999	+	ENSG00000243701.8
DUSP5-DT	chr10:110474340-110495066	TKS4_WT	TKS4_KO	399.611	362.636	0.907496	-0,143282101558589	-9.25043	0.90815	0.0418424	0.9999	-	ENSG00000273143.2
DYNLL2-DT	chr17:58076890-58083204	TKS4_WT	TKS4_KO	87.1474	137.629	1.5786	0,643842441557436	57.8603	0.6403	0.193616	0.9999	-	ENSG00000266290.1
DYRK3-AS1	chr1:206634195-206655175	TKS4_WT	TKS4_KO	124.044	284.642	2.29364	1,18721947492161	129.364	0.60375	0.219143	0.9999	-	ENSG00000237605.3
E2F3-IT1	chr6:20401878-20493714	TKS4_WT	TKS4_KO	0	136.859	1369.59	7,0976002628917	136859	0.12565	0.900838	0.9999	+	ENSG00000224707.1
EBLN3P	chr9:37079895-37090401	TKS4_WT	TKS4_KO	63760.1	63291.5	0.992651	-0,0106624795042648	-0.734941	0.982	0.00788851	0.9999	+	ENSG00000281649.3
ECE1-AS1	chr1:21217249-21345504	TKS4_WT	TKS4_KO	0	135.243	1353.43	7,08047646242963	135243	1	0	1	+	ENSG00000231105.2
ECI2-DT	chr6:4136071-4157385	TKS4_WT	TKS4_KO	215.899	138.052	0.639596	-0,65076695364452	-36.0404	0.56445	0.248375	0.9999	+	ENSG00000234817.2
EDRF1-DT	chr10:125683242-125719493	TKS4_WT	TKS4_KO	353.298	465.786	1.3183	0,395013656207092	31.8304	0.7422	0.129479	0.9999	-	ENSG00000224023.10
EFCAB13-DT	chr17:47253826-47323901	TKS4_WT	TKS4_KO	64.376	46.6719	0.725416	-0,483119073095278	-27.4584	1	0	1	-	ENSG00000263293.2
EFCAB14-AS1	chr1:46674035-46719114	TKS4_WT	TKS4_KO	0	23.336	234.36	4,55065444994586	23336	1	0	1	+	ENSG00000228237.5
EGFR-AS1	chr7:54992960-55211628	TKS4_WT	TKS4_KO	220.608	341.687	1.54859	0,625087561296374	54.8594	0.7715	0.112664	0.9999	-	ENSG00000224057.1
EGOT	chr3:4493347-4847840	TKS4_WT	TKS4_KO	0	70.0079	701.079	6,1315051161369	70007.9	1	0	1	-	ENSG00000235947.1
EHD4-AS1	chr15:41848145-41972557	TKS4_WT	TKS4_KO	0	88.0382	881.382	6,46169552840321	88038.2	1	0	1	+	ENSG00000259883.2
EIF1B-AS1	chr3:39808913-40309698	TKS4_WT	TKS4_KO	82.439	414.081	5.018	2,31146760071124	401.8	1	0	1	-	ENSG00000280739.4
EIF2AK3-DT	chr2:88627828-88631825	TKS4_WT	TKS4_KO	518.946	1139.98	2.19649	1,13270136033947	119.649	0.21005	0.677677	0.9999	+	ENSG00000234028.4
EIF2B5-DT	chr3:184073422-184145311	TKS4_WT	TKS4_KO	687.762	816.965	1.18783	0,246445304355119	18.7833	0.87685	0.0570747	0.9999	-	ENSG00000272721.5
EIF3J-DT	chr15:44534504-44536923	TKS4_WT	TKS4_KO	3368.1	3398.46	1.00901	0,0125603426781088	0.901372	0.9848	0.00665196	0.9999	-	ENSG00000179523.6
ELF3-AS1	chr1:201982647-202010353	TKS4_WT	TKS4_KO	909.14	940.219	1.03418	0,0470617878558365	3.41813	0.9773	0.0099721	0.9999	-	ENSG00000234678.2
ELFN1-AS1	chr7:1666074-1747954	TKS4_WT	TKS4_KO	4041.74	3888.44	0.962072	-0,0561048434688019	-3.79283	0.9515	0.0215912	0.9999	-	ENSG00000236081.1
ELN-AS1	chr7:74027771-74069907	TKS4_WT	TKS4_KO	64.376	114.293	1.7742	0,807165758324541	77.4195	1	0	1	-	ENSG00000232415.1
ELOA-AS1	chr1:23743365-23778297	TKS4_WT	TKS4_KO	1608.72	1284.64	0.79856	-0,325333340318398	-20.144	0.8649	0.0630341	0.9999	-	ENSG00000236810.7
ELOVL2-AS1	chr6:10980758-11079144	TKS4_WT	TKS4_KO	32.188	23.336	0.725842	-0,501935336213069	-27.4158	1	0	1	+	ENSG00000230314.7
EMC1-AS1	chr1:19074507-19251524	TKS4_WT	TKS4_KO	151.523	230.203	1.51892	0,594506391194784	51.8919	0.71505	0.145664	0.9999	+	ENSG00000230424.2
EML2-AS1	chr19:45609395-45645629	TKS4_WT	TKS4_KO	1284.44	1134.01	0.882892	-0,180701694152078	-11.7108	0.92355	0.0345396	0.9999	+	ENSG00000267757.4
EML6-AS1	chr2:54723466-55137831	TKS4_WT	TKS4_KO	32.188	113.1	3.50595	1,77014036178559	250.595	1	0	1	-	ENSG00000231334.2
EMSLR	chr7:101308306-101321823	TKS4_WT	TKS4_KO	9618.48	8174.61	0.849887	-0,234791356841608	-15.0113	0.8471	0.0720653	0.9999	+	ENSG00000232445.2
ENO1-AS1	chr1:8878834-8879885	TKS4_WT	TKS4_KO	279.505	93.3439	0.3342	-1,58585409379466	-66.58	0.36575	0.436816	0.9999	+	ENSG00000230679.1
ENTPD1-AS1	chr10:95710900-96090235	TKS4_WT	TKS4_KO	303.047	436.224	1.43931	0,521105476657458	43.9315	0.75565	0.121679	0.9999	-	ENSG00000226688.8
ENTPD3-AS1	chr3:40387181-40453308	TKS4_WT	TKS4_KO	87.1474	156.192	1.79137	0,82625401260868	79.1366	0.5877	0.230844	0.9999	-	ENSG00000223797.7
EP300-AS1	chr22:41185213-41197501	TKS4_WT	TKS4_KO	2976.36	2759.59	0.927172	-0,109527455898757	-7.28281	0.8884	0.0513915	0.9999	-	ENSG00000231993.1
EPB41L4A-AS1	chr5:112141828-112419277	TKS4_WT	TKS4_KO	15334.7	17493	1.14075	0,189891955733169	14.0745	0.7605	0.118901	0.9999	+	ENSG00000224032.8
EPB41L4A-DT	chr5:112419582-112420978	TKS4_WT	TKS4_KO	0	44.2855	443.855	5,47201654410515	44285.5	1	0	1	+	ENSG00000278921.2
EPCAM-DT	chr2:47192404-47345074	TKS4_WT	TKS4_KO	54.9594	113.1	2.05596	1,01642155913321	105.596	1	0	1	-	ENSG00000234690.7
EPHA1-AS1	chr7:143353399-143523449	TKS4_WT	TKS4_KO	128.752	92.1506	0.715942	-0,492126576848078	-28.4058	1	0	1	+	ENSG00000229153.6
EPN2-AS1	chr17:19237376-19387190	TKS4_WT	TKS4_KO	64.376	0	0.00155096	-9,3526172989585	-99.8449	1	0	1	-	ENSG00000235397.1
EPS15-AS1	chr1:51354262-51598769	TKS4_WT	TKS4_KO	32.188	0	0.00309713	-8,37451788104629	-99.6903	1	0	1	+	ENSG00000227070.1
ERI3-IT1	chr1:44221069-44355298	TKS4_WT	TKS4_KO	404.319	761.756	1.88383	0,910460530979794	88.3828	0.6874	0.16279	0.9999	-	ENSG00000233602.1
ERICD	chr8:140520155-140642406	TKS4_WT	TKS4_KO	2580.61	2399.94	0.929992	-0,105212620751484	-7.00079	0.94775	0.0233062	0.9999	+	ENSG00000280303.2
ERICH6-AS1	chr3:150659884-150720868	TKS4_WT	TKS4_KO	238.671	249.959	1.04728	0,0612131761500833	4.72754	0.9621	0.0167798	0.9999	+	ENSG00000240137.7
ERLNC1	chr1:204131061-204152044	TKS4_WT	TKS4_KO	32.188	70.0079	2.17133	1,07891532997797	117.133	1	0	1	+	ENSG00000230550.2
ERVK13-1	chr16:2658388-2673439	TKS4_WT	TKS4_KO	10712.6	10902	1.01768	0,0251627205377894	1.76799	0.9637	0.0160581	0.9999	-	ENSG00000260565.8
EVA1A-AS	chr2:75492317-75569719	TKS4_WT	TKS4_KO	0	35.2153	353.153	5,14222144699377	35215.3	1	0	1	+	ENSG00000231172.2
EWSAT1	chr15:69080849-69095824	TKS4_WT	TKS4_KO	0	68.8147	689.147	6,106739847847	68814.7	1	0	1	+	ENSG00000212766.9
EXOC3-AS1	chr5:441834-443160	TKS4_WT	TKS4_KO	1921.95	1557.61	0.810442	-0,303894579802234	-18.9558	0.68155	0.166502	0.9999	-	ENSG00000221990.5
EXOSC10-AS1	chr1:11066612-11102105	TKS4_WT	TKS4_KO	361.944	426.696	1.17885	0,23379968853076	17.8851	0.91625	0.037986	0.9999	+	ENSG00000230337.2
EXTL3-AS1	chr8:28607735-28755599	TKS4_WT	TKS4_KO	0	23.336	234.36	4,55065444994586	23336	1	0	1	-	ENSG00000246339.6
FABP6-AS1	chr5:160187380-160238722	TKS4_WT	TKS4_KO	0	66.4282	665.282	6,05589409529607	66428.2	1	0	1	-	ENSG00000247699.2
FAF1-AS1	chr1:50437027-50960267	TKS4_WT	TKS4_KO	128.752	202.864	1.57517	0,645467080839765	57.5172	1	0	1	+	ENSG00000225767.1
FALEC	chr1:150515756-150518032	TKS4_WT	TKS4_KO	59.6677	61.8931	1.03723	0,0311790308101168	3.72342	0.93645	0.0285154	0.9999	+	ENSG00000228126.1
FAM106A	chr17:18524565-18526846	TKS4_WT	TKS4_KO	0	66.4282	665.282	6,05589409529607	66428.2	1	0	1	-	ENSG00000273018.7
FAM111A-DT	chr11:59133971-59142808	TKS4_WT	TKS4_KO	1248.31	1101.83	0.882667	-0,181098927593808	-11.7333	0.83565	0.0779756	0.9999
FAM13A-AS1	chr4:88709788-89114901	TKS4_WT	TKS4_KO	844.764	730.543	0.864805	-0,211088491186477	-13.5195	0.9042	0.0437355	0.9999	+	ENSG00000248019.3
FAM153CP	chr5:178007691-178063588	TKS4_WT	TKS4_KO	32.188	44.2855	1.37467	0,419426757946219	37.4675	1	0	1	+	ENSG00000204677.13
FAM157C	chr16:90101178-90177606	TKS4_WT	TKS4_KO	0	22.1427	222.427	4,47526001964755	22142.7	1	0	1	+	ENSG00000260528.6
FAM167A-AS1	chr8:11339636-11475909	TKS4_WT	TKS4_KO	0	44.2855	443.855	5,47201654410515	44285.5	1	0	1
FAM182A	chr20:26054613-26086917	TKS4_WT	TKS4_KO	0	23.336	234.36	4,55065444994586	23336	1	0	1	+	ENSG00000125804.14
FAM182B	chr20:25763451-25801291	TKS4_WT	TKS4_KO	59.6677	0	0.00167314	-9,2447848075327	-99.8327	0.01135	1.945	0.9999	-	ENSG00000175170.16
FAM201A	chr9:38621087-38623284	TKS4_WT	TKS4_KO	2651.32	2890.06	1.09004	0,123894517106533	9.00423	0.86035	0.0653248	0.9999	+	ENSG00000204860.5
FAM215B	chr17:46500212-47100283	TKS4_WT	TKS4_KO	257.504	250.729	0.9737	-0,0434824471680685	-2.63001	0.96375	0.0160356	0.9999	-	ENSG00000232300.1
FAM222A-AS1	chr12:109713824-109773487	TKS4_WT	TKS4_KO	3206.39	1919.66	0.598711	-0,740473824991161	-40.1289	0.67465	0.170921	0.9999	-	ENSG00000255650.6
FAM223A	chrX:154571247-154571960	TKS4_WT	TKS4_KO	32.188	0	0.00309713	-8,37451788104629	-99.6903	0.0789	1.10292	0.9999	+	ENSG00000279245.1
FAM225A	chr9:113112895-113119846	TKS4_WT	TKS4_KO	0	23.336	234.36	4,55065444994586	23336	0.01305	1.88439	0.9999	+	ENSG00000231528.3
FAM230D	chr22:18178025-18205909	TKS4_WT	TKS4_KO	27.4797	0	0.00362586	-8,1537901390709	-99.6374	1	0	1	-	ENSG00000187979.4
FAM242C	chr12:54058253-54188985	TKS4_WT	TKS4_KO	21256.1	17370.8	0.817216	-0,291272287463209	-18.2784	0.61155	0.213568	0.9999
FAM27C	chr9:61854083-61855340	TKS4_WT	TKS4_KO	0	23.336	234.36	4,55065444994586	23336	1	0	1	+	ENSG00000231527.7
FAM27E3	chr9:67677209-67724090	TKS4_WT	TKS4_KO	1197.29	734.048	0.613124	-0,706834262725997	-38.6876	0.40835	0.388967	0.9999	-	ENSG00000274026.2
FAM41C	chr1:860184-876802	TKS4_WT	TKS4_KO	0	22.1427	222.427	4,47526001964755	22142.7	1	0	1	-	ENSG00000230368.2
FAM53B-AS1	chr10:124614848-124744378	TKS4_WT	TKS4_KO	0	23.336	234.36	4,55065444994586	23336	1	0	1	+	ENSG00000233334.3
FAM66A	chr8:12362018-12411001	TKS4_WT	TKS4_KO	0	66.4282	665.282	6,05589409529607	66428.2	1	0	1	+	ENSG00000227888.4
FAM66B	chr8:7298743-7355363	TKS4_WT	TKS4_KO	0	22.1427	222.427	4,47526001964755	22142.7	1	0	1	-	ENSG00000215374.6
FAM66C	chr12:8180208-8218911	TKS4_WT	TKS4_KO	225.316	291.325	1.29283	0,364786061532122	29.2832	1	0	1	+	ENSG00000226711.8
FAM66D	chr8:12115781-12158034	TKS4_WT	TKS4_KO	32.188	134.05	4.15479	2,01511345821423	315.479	1	0	1	+	ENSG00000255052.5
FAM66E	chr8:7955012-8008755	TKS4_WT	TKS4_KO	0	70.0079	701.079	6,1315051161369	70007.9	1	0	1	+	ENSG00000225725.4
FAM78B-AS1	chr1:166055917-166340894	TKS4_WT	TKS4_KO	64.376	253.539	3.93385	1,95594357968508	293.385	0.53485	0.271768	0.9999	+	ENSG00000203307.2
FAM83A-AS1	chr8:123179046-123210079	TKS4_WT	TKS4_KO	109.919	90.9574	0.827652	-0,284658343621263	-17.2348	1	0	1	-	ENSG00000204949.10
FAM87B	chr1:817370-819834	TKS4_WT	TKS4_KO	0	17.6076	177.076	4,14629678451923	17607.6	1	0	1	+	ENSG00000177757.2
FBXL19-AS1	chr16:30919318-30948783	TKS4_WT	TKS4_KO	7212.6	7388.87	1.02444	0,0346538443480102	2.44388	0.82895	0.0814717	0.9999	-	ENSG00000260852.1
FBXO3-DT	chr11:33774698-33775670	TKS4_WT	TKS4_KO	0	23.336	234.36	4,55065444994586	23336	1	0	1	+	ENSG00000254508.5
FER1L6-AS2	chr8:123851986-124171522	TKS4_WT	TKS4_KO	54.9594	0	0.00181622	-9,12823668369867	-99.8184	1	0	1	-	ENSG00000253868.4
FEZF1-AS1	chr7:122300938-122311855	TKS4_WT	TKS4_KO	2125.26	2987.42	1.40565	0,49063035023597	40.5654	0.52905	0.276503	0.9999	+	ENSG00000230316.8
FGD5-AS1	chr3:14942778-15065315	TKS4_WT	TKS4_KO	85231.4	80415.3	0.943494	-0,0839301446167072	-5.65061	0.9334	0.0299322	0.9999	-	ENSG00000225733.7
FGF14-IT1	chr13:101452635-102402443	TKS4_WT	TKS4_KO	0	23.336	234.36	4,55065444994586	23336	1	0	1
FGGY-DT	chr1:59289222-59762730	TKS4_WT	TKS4_KO	537.009	431.874	0.804258	-0,316685825976161	-19.5742	0.71565	0.145299	0.9999	-	ENSG00000224609.8
FHAD1-AS1	chr1:15236520-15430339	TKS4_WT	TKS4_KO	0	126.173	1262.73	6,98040238131274	126173	0.09535	1.02068	0.9999	-	ENSG00000233485.1
FIRRE	chrX:131691524-131830643	TKS4_WT	TKS4_KO	8255.37	10229.4	1.23912	0,309156100316466	23.9118	0.64705	0.189062	0.9999
FKBP14-AS1	chr7:29920102-30026702	TKS4_WT	TKS4_KO	59.6677	158.579	2.65493	1,38711068784479	165.493	0.5774	0.238523	0.9999	+	ENSG00000227014.6
FLG-AS1	chr1:152302164-152366692	TKS4_WT	TKS4_KO	114.627	99.4949	0.868103	-0,215334547562396	-13.1897	0.88595	0.0525908	0.9999	+	ENSG00000237975.7
FLJ12825	chr12:54058253-54188985	TKS4_WT	TKS4_KO	64.376	249.536	3.87177	1,93299298591486	287.177	1	0	1	+	ENSG00000248265.2
FLJ13224	chr12:31280583-31326218	TKS4_WT	TKS4_KO	661.823	632.351	0.955475	-0,0676699556576581	-4.45248	0.9794	0.0090399	0.9999	+	ENSG00000177340.5
FLJ16779	chr20:63240779-63261615	TKS4_WT	TKS4_KO	0	46.6719	467.719	5,54757013097586	46671.9	1	0	1	+	ENSG00000275620.1
FLJ20021	chr4:101023417-101348883	TKS4_WT	TKS4_KO	8604.05	8724.15	1.01396	0,0198475369622937	1.39584	0.99155	0.00368538	0.9999	+	ENSG00000254531.2
FLJ37453	chr1:15834214-15976132	TKS4_WT	TKS4_KO	1340.17	2560.45	1.91047	0,932961613307455	91.0473	0.58245	0.234741	0.9999	-	ENSG00000179743.4
FLJ42969	chr8:101052053-101076251	TKS4_WT	TKS4_KO	0	70.4306	705.306	6,14017740758035	70430.6	1	0	1	+	ENSG00000248599.2
FLJ46284	chr8:92712961-92786060	TKS4_WT	TKS4_KO	0	22.1427	222.427	4,47526001964755	22142.7	1	0	1	-	ENSG00000248858.7
FLNB-AS1	chr3:58008421-58172251	TKS4_WT	TKS4_KO	454.57	298.595	0.656949	-0,608999658558565	-34.3051	0.74455	0.128106	0.9999	-	ENSG00000244161.1
FLVCR1-DT	chr1:212856603-212858138	TKS4_WT	TKS4_KO	3945.17	2948.26	0.747315	-0,420540417516876	-25.2685	0.55205	0.258022	0.9999	-	ENSG00000198468.10
FMNL1-DT	chr17:45190930-45247322	TKS4_WT	TKS4_KO	0	70.0079	701.079	6,1315051161369	70007.9	1	0	1	-	ENSG00000267121.6
FMR1-AS1	chrX:147909430-147911817	TKS4_WT	TKS4_KO	27.4797	67.6214	2.45548	1,24967784898434	145.548	1	0	1	-	ENSG00000268066.5
FOCAD-AS1	chr9:20658308-20995955	TKS4_WT	TKS4_KO	0	67.6214	677.214	6,08153989316787	67621.4	1	0	1	-	ENSG00000227071.1
FOXCUT	chr6:1605530-1607358	TKS4_WT	TKS4_KO	64.376	99.4949	1.54468	0,607310758279348	54.4682	1	0	1	+	ENSG00000280916.3
FOXD2-AS1	chr1:47380795-47437317	TKS4_WT	TKS4_KO	2126.81	2615.71	1.22986	0,297888421102922	22.9864	0.71935	0.14306	0.9999	-	ENSG00000237424.1
FOXD3-AS1	chr1:63320883-63325128	TKS4_WT	TKS4_KO	211.191	320.737	1.51846	0,596477061630144	51.846	0.7472	0.126563	0.9999	-	ENSG00000230798.6
FOXN3-AS1	chr14:89156176-89619165	TKS4_WT	TKS4_KO	1022.23	462.554	0.452549	-1,14512489897518	-54.7451	0.5823	0.234853	0.9999	+	ENSG00000258920.1
FOXO6-AS1	chr1:41361433-41383590	TKS4_WT	TKS4_KO	0	22.1427	222.427	4,47526001964755	22142.7	1	0	1	-	ENSG00000229901.1
FOXP4-AS1	chr6:41523894-41602384	TKS4_WT	TKS4_KO	673.637	830.276	1.23249	0,299653302566489	23.2493	0.91675	0.0377491	0.9999	-	ENSG00000234753.6
FRG1-DT	chr4:189764390-189940733	TKS4_WT	TKS4_KO	307.755	114.293	0.371581	-1,43246372736963	-62.8419	0.3941	0.404394	0.9999	-	ENSG00000245685.8
FRMD6-AS1	chr14:51454511-51730727	TKS4_WT	TKS4_KO	1995.74	1180.8	0.591681	-0,757759687654205	-40.8319	0.75505	0.122024	0.9999	-	ENSG00000273888.1
FRY-AS1	chr13:32024045-32031639	TKS4_WT	TKS4_KO	32.188	0	0.00309713	-8,37451788104629	-99.6903	1	0	1	-	ENSG00000237637.1
FSIP2-AS1	chr2:185719873-185833290	TKS4_WT	TKS4_KO	0	44.2855	443.855	5,47201654410515	44285.5	1	0	1	-	ENSG00000231646.6
FSIP2-AS2	chr2:185719873-185833290	TKS4_WT	TKS4_KO	0	88.5709	886.709	6,47038881368846	88570.9	1	0	1	-	ENSG00000226747.6
FTX	chrX:73944323-74293574	TKS4_WT	TKS4_KO	2031.01	1994.53	0.982039	-0,0267863478385673	-1.79606	0.9841	0.00696077	0.9999	-	ENSG00000230590.12
FUT8-AS1	chr14:65410591-65744122	TKS4_WT	TKS4_KO	821.222	1347.78	1.64111	0,713092181595729	64.111	0.6899	0.161214	0.9999	-	ENSG00000276116.2
FZD4-DT	chr11:86955620-87000950	TKS4_WT	TKS4_KO	64.376	44.2855	0.688403	-0,558672659965992	-31.1597	1	0	1	+	ENSG00000246523.9
GABARAPL1-AS1	chr12:10212876-10223128	TKS4_WT	TKS4_KO	114.627	137.629	1.20049	0,252354042901811	20.0493	0.8973	0.0470623	0.9999	-	ENSG00000255958.1
GABPB1-AS1	chr15:50275388-50359306	TKS4_WT	TKS4_KO	27262.2	25455.1	0.933714	-0,0989945066385126	-6.62857	0.92765	0.0326159	0.9999	+	ENSG00000244879.9
GABPB1-IT1	chr15:50275388-50359306	TKS4_WT	TKS4_KO	9197.47	7162.49	0.778748	-0,360912552898269	-22.1252	0.76605	0.115743	0.9999	-	ENSG00000285410.1
GACAT2	chr18:8695855-8832778	TKS4_WT	TKS4_KO	0	89.7641	898.641	6,48967298041586	89764.1	1	0	1	-	ENSG00000265962.2
GAPLINC	chr18:3461843-3481830	TKS4_WT	TKS4_KO	27.4797	0	0.00362586	-8,1537901390709	-99.6374	1	0	1	+	ENSG00000266835.6
GARS1-DT	chr7:30548356-30577779	TKS4_WT	TKS4_KO	2245.37	1993.1	0.887654	-0,172509094731681	-11.2346	0.8187	0.0868752	0.9999	-	ENSG00000196295.13
GAS1RR	chr9:86948697-87002033	TKS4_WT	TKS4_KO	0	22.1427	222.427	4,47526001964755	22142.7	1	0	1	+	ENSG00000226237.3
GAS5	chr1:173863247-173903547	TKS4_WT	TKS4_KO	89324.5	86957.8	0.973504	-0,0387549840740425	-2.64955	0.96105	0.017254	0.9999
GAS5-AS1	chr1:173863247-173903547	TKS4_WT	TKS4_KO	298.338	251.152	0.84189	-0,252640355589323	-15.811	0.8887	0.0512448	0.9999	+	ENSG00000270084.2
GAS6-AS1	chr13:113759216-113864076	TKS4_WT	TKS4_KO	6435.38	7838.64	1.21805	0,28437226958132	21.8051	0.85485	0.0681101	0.9999
GAS6-DT	chr13:113864176-113866832	TKS4_WT	TKS4_KO	2195.98	1987.42	0.905031	-0,144552358372983	-9.49692	0.8559	0.067577	0.9999	+	ENSG00000272695.2
GAS8-AS1	chr16:90004870-90047783	TKS4_WT	TKS4_KO	0	70.0079	701.079	6,1315051161369	70007.9	1	0	1	-	ENSG00000221819.6
GASAL1	chr8:102806821-102811214	TKS4_WT	TKS4_KO	2527.27	5002.91	1.97953	0,98464579539151	97.9532	0.1673	0.776504	0.9999	+	ENSG00000253669.4
GATA2-AS1	chr3:128479421-128503207	TKS4_WT	TKS4_KO	3395.49	3169.25	0.933372	-0,0998576173045913	-6.66276	0.95215	0.0212946	0.9999	+	ENSG00000244300.3
GATA6-AS1	chr18:22166897-22168968	TKS4_WT	TKS4_KO	0	45.4787	455.787	5,51028787139273	45478.7	1	0	1	-	ENSG00000266010.3
GCC2-AS1	chr2:108448560-108687246	TKS4_WT	TKS4_KO	32.188	66.4282	2.06046	1,00330430913714	106.046	1	0	1	-	ENSG00000214184.3
GEMIN7-AS1	chr19:45071499-45091518	TKS4_WT	TKS4_KO	54.9594	158.469	2.87996	1,5026583548699	187.996	1	0	1	-	ENSG00000267348.3
GHET1	chr7:148987526-148989429	TKS4_WT	TKS4_KO	734.075	312.09	0.425226	-1,23546713024605	-57.4774	0.2549	0.59363	0.9999	+	ENSG00000281189.1
GHRLOS	chr3:10248458-10293449	TKS4_WT	TKS4_KO	63922.8	55929.6	0.874956	-0,192738581037365	-12.5044	0.7049	0.151872	0.9999
GIHCG	chr12:57931448-57936164	TKS4_WT	TKS4_KO	4030.01	2067.16	0.512954	-0,963421513759535	-48.7046	0.2592	0.586365	0.9999	-	ENSG00000257698.3
GLCCI1-DT	chr7:7949838-7968752	TKS4_WT	TKS4_KO	32.188	22.1427	0.688884	-0,577329766511377	-31.1116	1	0	1	-	ENSG00000233108.1
GLIDR	chr9:39803495-39810159	TKS4_WT	TKS4_KO	830.639	1347.73	1.62245	0,696609222212464	62.2447	0.43155	0.364969	0.9999	-	ENSG00000278175.5
GLYCTK-AS1	chr3:52282892-52295257	TKS4_WT	TKS4_KO	0	35.2153	353.153	5,14222144699377	35215.3	1	0	1	-	ENSG00000242797.3
GMDS-DT	chr6:2245752-2413591	TKS4_WT	TKS4_KO	206.483	371.174	1.79721	0,839491153117499	79.7215	0.5362	0.270673	0.9999	+	ENSG00000250903.10
GNA15-DT	chr19:3136032-3163749	TKS4_WT	TKS4_KO	146.815	152.318	1.03746	0,0442406108138055	3.7457	0.88165	0.0547038	0.9999	-	ENSG00000267551.3
GNAS-AS1	chr20:58818917-58911196	TKS4_WT	TKS4_KO	0	23.336	234.36	4,55065444994586	23336	1	0	1	-	ENSG00000235590.8
GNG12-AS1	chr1:67701474-68233018	TKS4_WT	TKS4_KO	32.188	156.192	4.84056	2,23551033770701	384.056	1	0	1	+	ENSG00000232284.8
GOLGA4-AS1	chr3:37241790-37366879	TKS4_WT	TKS4_KO	2203	2150.02	0.975952	-0,0357070438274813	-2.40479	0.9825	0.00766744	0.9999	-	ENSG00000270194.1
GOLGA8M	chr15:28698694-28758362	TKS4_WT	TKS4_KO	280.275	253.116	0.903133	-0,151612762740314	-9.68667	0.8449	0.0731947	0.9999	-	ENSG00000261480.1
GP6-AS1	chr19:55006032-55069531	TKS4_WT	TKS4_KO	0	23.336	234.36	4,55065444994586	23336	1	0	1	+	ENSG00000267265.6
GPR176-DT	chr15:39921015-39925880	TKS4_WT	TKS4_KO	82.439	122.831	1.48937	0,559054999088172	48.9369	1	0	1	+	ENSG00000246863.2
GPRC5D-AS1	chr12:12927725-13022498	TKS4_WT	TKS4_KO	3871.38	4003.2	1.03405	0,0479692002394811	3.4049	0.96755	0.0143266	0.9999	+	ENSG00000247498.11
GRASLND	chr2:6912275-7077880	TKS4_WT	TKS4_KO	0	22.1427	222.427	4,47526001964755	22142.7	1	0	1	-	ENSG00000228203.7
GREB1L-DT	chr18:21240629-21242186	TKS4_WT	TKS4_KO	27.4797	0	0.00362586	-8,1537901390709	-99.6374	1	0	1	-	ENSG00000265984.1
GRHL3-AS1	chr1:24305927-24472983	TKS4_WT	TKS4_KO	32.188	70.4306	2.18442	1,08758762142142	118.442	1	0	1	-	ENSG00000232298.2
GRK5-IT1	chr10:119207570-119459745	TKS4_WT	TKS4_KO	597.447	1064.89	1.78227	0,831544494786472	78.227	0.7444	0.128194	0.9999	+	ENSG00000228485.1
GRM3-AS1	chr7:86643908-86864879	TKS4_WT	TKS4_KO	606.093	870.246	1.43576	0,519671509881458	43.5757	0.82235	0.0849433	0.9999	-	ENSG00000233073.2
GRTP1-AS1	chr13:113297238-113364158	TKS4_WT	TKS4_KO	64.376	22.1427	0.344976	-1,55542918442359	-65.5024	1	0	1	+	ENSG00000225083.2
GS1-124K5.4	chr7:66493631-66495474	TKS4_WT	TKS4_KO	2741.63	1668.02	0.608419	-0,717336929586505	-39.1581	0.41265	0.384418	0.9999	+	ENSG00000237310.3
GS1-24F4.2	chr8:6835553-6842454	TKS4_WT	TKS4_KO	0	35.2153	353.153	5,14222144699377	35215.3	1	0	1	+	ENSG00000245857.3
GSEC	chr11:126304059-126355587	TKS4_WT	TKS4_KO	2101.72	1302.86	0.61992	-0,690463957535794	-38.008	0.76575	0.115913	0.9999	-	ENSG00000280832.2
GSN-AS1	chr9:121178132-121332844	TKS4_WT	TKS4_KO	537.779	226.2	0.420727	-1,25145703533742	-57.9273	0.62005	0.207573	0.9999	-	ENSG00000235865.2
GTSE1-DT	chr22:46295142-46333699	TKS4_WT	TKS4_KO	325.818	244.891	0.751695	-0,415758693008708	-24.8305	0.85025	0.0704534	0.9999	-	ENSG00000277232.2
GUSBP11	chr22:23638486-23717423	TKS4_WT	TKS4_KO	12004	13641.8	1.13644	0,184409188717626	13.6437	0.76765	0.114837	0.9999	-	ENSG00000228315.12
H1-10-AS1	chr3:129314770-129324569	TKS4_WT	TKS4_KO	156.232	226.438	1.44908	0,526858205432718	44.9083	0.809	0.0920515	0.9999	+	ENSG00000206417.8
H19	chr11:1947271-2013176	TKS4_WT	TKS4_KO	1415.5	845.259	0.597174	-0,744694553398444	-40.2826	0.72655	0.138734	0.9999
H2AZ1-DT	chr4:99950493-100037705	TKS4_WT	TKS4_KO	32.188	0	0.00309713	-8,37451788104629	-99.6903	1	0	1	+	ENSG00000245322.7
HAGLR	chr2:176173188-176190907	TKS4_WT	TKS4_KO	91.8557	0	0.00108748	-9,85884666331001	-99.8913	5e-05	4.30103	0.0171564	-	ENSG00000224189.8
HAR1A	chr20:63095492-63104386	TKS4_WT	TKS4_KO	624.927	1161.46	1.85842	0,891997363149846	85.8416	0.40515	0.392384	0.9999	+	ENSG00000225978.3
HAR1B	chr20:63095492-63104386	TKS4_WT	TKS4_KO	156.232	183.531	1.17462	0,223914764399788	17.4622	0.94585	0.0241777	0.9999	-	ENSG00000231133.8
HAS2-AS1	chr8:121612115-121645325	TKS4_WT	TKS4_KO	91.8557	416.01	4.52511	2,16390258115281	352.511	0.4066	0.390833	0.9999	+	ENSG00000248690.8
HCFC1-AS1	chrX:153947555-153972360	TKS4_WT	TKS4_KO	64.376	23.336	0.363484	-1,48003475412528	-63.6516	1	0	1	+	ENSG00000235802.1
HCG14	chr6:28896529-28897320	TKS4_WT	TKS4_KO	0	52.8229	529.229	5,72582021358987	52822.9	1	0	1	+	ENSG00000224157.1
HCG15	chr6:28984748-28988567	TKS4_WT	TKS4_KO	59.6677	0	0.00167314	-9,2447848075327	-99.8327	1	0	1	+	ENSG00000227214.2
HCG17	chr6:30234038-30346894	TKS4_WT	TKS4_KO	219.837	159.772	0.726899	-0,466064620653846	-27.3101	0.8503	0.0704278	0.9999	-	ENSG00000270604.5
HCG18	chr6:30234038-30346894	TKS4_WT	TKS4_KO	29601.4	32847.6	1.10966	0,150078210013783	10.9663	0.81925	0.0865835	0.9999	-	ENSG00000231074.10
HCG20	chr6:30766824-30792250	TKS4_WT	TKS4_KO	27.4797	88.0382	3.19576	1,62983348421967	219.576	1	0	1	+	ENSG00000228022.6
HCG27	chr6:31197759-31203968	TKS4_WT	TKS4_KO	459.278	484.164	1.05417	0,0732882701047233	5.41733	0.93825	0.0276814	0.9999	+	ENSG00000206344.8
HCP5	chr6:31463179-31465809	TKS4_WT	TKS4_KO	4357.28	8626.44	1.97975	0,985023141893048	97.9754	0.1312	0.882066	0.9999	+	ENSG00000206337.12
HCP5B	chr6:29871894-29873783	TKS4_WT	TKS4_KO	280.275	592.416	2.1133	1,07487278214864	111.33	0.3679	0.43427	0.9999	-	ENSG00000281831.1
HDAC11-AS1	chr3:13476986-13506416	TKS4_WT	TKS4_KO	119.335	167.539	1.4036	0,478301502465095	40.36	0.83675	0.0774043	0.9999	-	ENSG00000244502.2
HDAC2-AS2	chr6:113933027-114469332	TKS4_WT	TKS4_KO	243.379	68.8147	0.283042	-1,82623665860014	-71.6958	0.4207	0.376027	0.9999	+	ENSG00000228624.8
HDAC4-AS1	chr2:239048167-239402364	TKS4_WT	TKS4_KO	312.463	158.579	0.50767	-0,982183952035168	-49.233	0.6373	0.195656	0.9999	+	ENSG00000222020.4
HDHD5-AS1	chr22:17137519-17165445	TKS4_WT	TKS4_KO	114.627	246.617	2.15047	1,09337880762271	115.047	0.565	0.247952	0.9999	+	ENSG00000185837.4
HEATR6-DT	chr17:60079308-60088695	TKS4_WT	TKS4_KO	160.94	273.295	1.69768	0,75552747573641	69.7684	0.58775	0.230807	0.9999	+	ENSG00000267416.2
HECW1-IT1	chr7:43112579-43566001	TKS4_WT	TKS4_KO	119.335	89.7641	0.75241	-0,421239527537547	-24.759	0.88385	0.0536214	0.9999	+	ENSG00000181211.1
HEIH	chr5:180829953-180835726	TKS4_WT	TKS4_KO	6272.89	6209.91	0.98996	-0,0147646430328709	-1.00399	0.98935	0.00465004	0.9999	-	ENSG00000278970.3
HELZ-AS1	chr17:67070443-67262080	TKS4_WT	TKS4_KO	119.335	46.6719	0.39161	-1,36334237697755	-60.839	0.57775	0.23826	0.9999	+	ENSG00000266473.1
HERPUD2-AS1	chr7:35632658-35699413	TKS4_WT	TKS4_KO	9190.36	6020.29	0.655069	-0,610421398156225	-34.4931	0.59155	0.228009	0.9999	+	ENSG00000271122.1
HEXA-AS1	chr15:72376112-72378788	TKS4_WT	TKS4_KO	201.774	86.4223	0.428596	-1,2287287578684	-57.1404	0.36425	0.4386	0.9999	+	ENSG00000260339.1
HEXD-IT1	chr17:82389209-82450821	TKS4_WT	TKS4_KO	193.128	205.251	1.06274	0,0810837530499515	6.27394	1	0	1	+	ENSG00000279066.1
HHATL-AS1	chr3:42692662-42773635	TKS4_WT	TKS4_KO	0	23.336	234.36	4,55065444994586	23336	1	0	1	+	ENSG00000230970.4
HHIP-AS1	chr4:144642915-144646019	TKS4_WT	TKS4_KO	124.044	236.354	1.90468	0,919123713326008	90.4675	0.49965	0.301334	0.9999	-	ENSG00000248890.3
HHLA3	chr1:70258998-70368023	TKS4_WT	TKS4_KO	2728.96	2506.89	0.918628	-0,12292357110811	-8.13723	0.93415	0.0295834	0.9999	+	ENSG00000197568.15
HHLA3-AS1	chr1:70258998-70368023	TKS4_WT	TKS4_KO	0	22.1427	222.427	4,47526001964755	22142.7	1	0	1	-	ENSG00000226088.1
HIF1A-AS1	chr14:61681040-61751097	TKS4_WT	TKS4_KO	0	99.4949	995.949	6,63799996235049	99494.9	1	0	1	-	ENSG00000258777.2
HIPK1-AS1	chr1:113924000-113977869	TKS4_WT	TKS4_KO	96.564	120.444	1.24704	0,305139030388235	24.7041	0.89915	0.0461679	0.9999	-	ENSG00000235527.7
HLA-F-AS1	chr6:29723433-29749049	TKS4_WT	TKS4_KO	1041.83	1071.62	1.02859	0,0394240413941081	2.85912	0.9833	0.00731396	0.9999
HLX-AS1	chr1:220832762-220885059	TKS4_WT	TKS4_KO	91.8557	23.336	0.254862	-1,98626411847678	-74.5138	0.5387	0.268653	0.9999	-	ENSG00000257551.1
HM13-AS1	chr20:31514441-31577965	TKS4_WT	TKS4_KO	27.4797	79.5007	2.88621	1,48284716843366	188.621	1	0	1	-	ENSG00000230613.1
HMGA1P4	chr9:128663130-128696396	TKS4_WT	TKS4_KO	477.341	418.031	0.875775	-0,194084446261087	-12.4225	0.90365	0.0439997	0.9999
HMGA2-AS1	chr12:65758019-65966291	TKS4_WT	TKS4_KO	32.188	379.289	11.7502	3,5149442534893	1075.02	0.32775	0.484457	0.9999	-	ENSG00000197301.7
HMGA2-AS1	chr12:65758019-65966291	TKS4_WT	TKS4_KO	2774.5	3521.71	1.2693	0,343569385447325	26.9304	0.8265	0.0827571	0.9999	-	ENSG00000197301.7
HMGN3-AS1	chr6:79201244-79236800	TKS4_WT	TKS4_KO	931.911	635.161	0.681602	-0,554390002290811	-31.8398	0.8157	0.0884695	0.9999	+	ENSG00000270362.2
HNF1A-AS1	chr12:120969837-120972292	TKS4_WT	TKS4_KO	59.6677	57.358	0.961355	-0,0784208413911647	-3.86446	0.93425	0.0295369	0.9999	-	ENSG00000241388.5
HNRNPD-DT	chr4:82374329-82384027	TKS4_WT	TKS4_KO	91.8557	351.84	3.82728	1,92226711532628	282.728	0.1714	0.765989	0.9999	+	ENSG00000272677.2
HOMER3-AS1	chr19:18929200-18946831	TKS4_WT	TKS4_KO	87.1474	115.487	1.32482	0,390989226441043	32.4819	0.8774	0.0568024	0.9999	+	ENSG00000269019.2
HOTAIR	chr12:53962307-53977643	TKS4_WT	TKS4_KO	160.94	183.108	1.13766	0,178023119204242	13.7655	1	0	1	-	ENSG00000228630.5
HOTAIRM1	chr7:27096093-27100258	TKS4_WT	TKS4_KO	2046.76	3442.41	1.68185	0,749414205583586	68.1849	0.3009	0.521578	0.9999	+	ENSG00000233429.9
HOTTIP	chr7:27200420-27207259	TKS4_WT	TKS4_KO	376.839	22.1427	0.0590088	-4,08636779245349	-94.0991	0.0174	1.75945	0.9999	+	ENSG00000243766.8
HOXA10-AS	chr7:27162437-27180261	TKS4_WT	TKS4_KO	5764.99	6456.61	1.11997	0,163230895833849	11.9967	0.9238	0.034422	0.9999	+	ENSG00000253187.2
HOXA11-AS	chr7:27185407-27189293	TKS4_WT	TKS4_KO	799.221	660.46	0.826401	-0,276708879135607	-17.3599	0.7837	0.10585	0.9999	+	ENSG00000240990.10
HOXA-AS2	chr7:27106189-27156675	TKS4_WT	TKS4_KO	0	45.4787	455.787	5,51028787139273	45478.7	1	0	1	+	ENSG00000253552.8
HOXA-AS3	chr7:27106189-27156675	TKS4_WT	TKS4_KO	734.845	690.075	0.939084	-0,092439689431334	-6.09161	0.9642	0.0158329	0.9999	+	ENSG00000254369.6
HOXB-AS1	chr17:48542654-48590241	TKS4_WT	TKS4_KO	109.919	23.336	0.213018	-2,2427082546335	-78.6982	1	0	1	+	ENSG00000230148.8
HOXB-AS2	chr17:48542654-48590241	TKS4_WT	TKS4_KO	91.8557	176.186	1.91708	0,924855526908835	91.7075	0.65055	0.186719	0.9999	+	ENSG00000239552.2
HOXB-AS3	chr17:48590419-48606414	TKS4_WT	TKS4_KO	183.711	140.016	0.762283	-0,398648076853367	-23.7717	0.76935	0.113876	0.9999	+	ENSG00000233101.10
HOXB-AS4	chr17:48628697-48647513	TKS4_WT	TKS4_KO	32.188	22.1427	0.688884	-0,577329766511377	-31.1116	1	0	1	+	ENSG00000242207.1
HOXC13-AS	chr12:53935327-53946544	TKS4_WT	TKS4_KO	96.564	0	0.00103451	-9,93020509778443	-99.8965	1	0	1	-	ENSG00000249641.2
HOXC-AS1	chr12:53999021-54000010	TKS4_WT	TKS4_KO	358.006	373.212	1.04246	0,0563739286352829	4.24623	0.9546	0.0201786	0.9999	-	ENSG00000250451.5
HOXC-AS2	chr12:53995207-53996785	TKS4_WT	TKS4_KO	0	88.0382	881.382	6,46169552840321	88038.2	1	0	1	-	ENSG00000250133.2
HOXD-AS2	chr2:176134840-176140391	TKS4_WT	TKS4_KO	811.806	394.932	0.486549	-1,0409415267705	-51.3451	0.39965	0.39832	0.9999	-	ENSG00000237380.7
HPYR1	chr8:132560497-132561479	TKS4_WT	TKS4_KO	0	23.336	234.36	4,55065444994586	23336	1	0	1	-	ENSG00000253521.2
HS1BP3-IT1	chr2:20552933-20652196	TKS4_WT	TKS4_KO	0	93.3439	934.439	6,54602858307408	93343.9	1	0	1	-	ENSG00000231948.2
HSD17B1-AS1	chr17:42552435-42555214	TKS4_WT	TKS4_KO	14016.3	15313.9	1.09258	0,127642676963631	9.25773	0.83305	0.0793289	0.9999	-	ENSG00000266962.2
HYMAI	chr6:143940299-144064599	TKS4_WT	TKS4_KO	36432	34366.5	0.943305	-0,0842386674729234	-5.66945	0.90545	0.0431355	0.9999
IBA57-DT	chr1:228164085-228165512	TKS4_WT	TKS4_KO	32.188	88.5709	2.74625	1,41779902752953	174.625	1	0	1	-	ENSG00000203684.5
ID2-AS1	chr2:8670983-8681863	TKS4_WT	TKS4_KO	890.307	875.147	0.982974	-0,0262322246643287	-1.70259	0.9805	0.0085524	0.9999	-	ENSG00000235092.7
IDH1-AS1	chr2:208255232-208256194	TKS4_WT	TKS4_KO	87.1474	547.563	6.27713	2,63529849399505	527.713	0.12265	0.911332	0.9999	+	ENSG00000231908.2
IDH2-DT	chr15:90083044-90133572	TKS4_WT	TKS4_KO	0	44.2855	443.855	5,47201654410515	44285.5	1	0	1	+	ENSG00000259685.3
IDI2-AS1	chr10:988433-1132372	TKS4_WT	TKS4_KO	890.307	416.415	0.46778	-1,09755398387966	-53.222	0.53605	0.270795	0.9999	+	ENSG00000232656.9
IER3-AS1	chr6:30742962-30744547	TKS4_WT	TKS4_KO	2232.02	6816.96	3.05407	1,61015350821643	205.407	0.3106	0.507799	0.9999	+	ENSG00000272273.2
IFT74-AS1	chr9:26903371-27066134	TKS4_WT	TKS4_KO	59.6677	145.396	2.43436	1,26197896799842	143.436	0.61505	0.21109	0.9999	-	ENSG00000234676.1
IGF2-AS	chr11:2129111-2161209	TKS4_WT	TKS4_KO	225.316	416.468	1.848	0,880213435112699	84.7997	0.7479	0.126156	0.9999	+	ENSG00000099869.8
IGF2BP2-AS1	chr3:185643129-185825046	TKS4_WT	TKS4_KO	32.188	0	0.00309713	-8,37451788104629	-99.6903	1	0	1	+	ENSG00000163915.7
IL12A-AS1	chr3:159913399-160207092	TKS4_WT	TKS4_KO	32.188	22.1427	0.688884	-0,577329766511377	-31.1116	1	0	1	-	ENSG00000244040.7
IL20RB-AS1	chr3:136862207-137011085	TKS4_WT	TKS4_KO	91.8557	129.515	1.40954	0,481170308504949	40.9537	0.8606	0.0651987	0.9999	-	ENSG00000249407.1
IL21-AS1	chr4:122610107-122689156	TKS4_WT	TKS4_KO	64.376	0	0.00155096	-9,3526172989585	-99.8449	1	0	1	+	ENSG00000227145.2
IL21R-AS1	chr16:27402161-27453393	TKS4_WT	TKS4_KO	32.188	464.518	14.3898	3,80731145102059	1338.98	0.4079	0.389446	0.9999	-	ENSG00000259954.1
IL6R-AS1	chr1:154402320-154548147	TKS4_WT	TKS4_KO	64.376	0	0.00155096	-9,3526172989585	-99.8449	1	0	1	-	ENSG00000228013.1
ILF3-DT	chr19:10651861-10653872	TKS4_WT	TKS4_KO	8629.81	9583.45	1.1105	0,151064204873739	11.0504	0.7894	0.102703	0.9999	-	ENSG00000267100.1
ILRUN-AS1	chr6:34587287-34697471	TKS4_WT	TKS4_KO	1421.07	523.492	0.368423	-1,44147752243019	-63.1577	0.40655	0.390886	0.9999	+	ENSG00000272288.7
INE1	chrX:47190846-47229997	TKS4_WT	TKS4_KO	280009	402858	1.43873	0,524793412056396	43.8732	0.50825	0.293923	0.9999
INE2	chrX:15627317-15788411	TKS4_WT	TKS4_KO	96.564	122.831	1.27174	0,33342795862351	27.1735	1	0	1	-	ENSG00000281371.1
INKA2-AS1	chr1:111722063-111755797	TKS4_WT	TKS4_KO	179.003	483.631	2.70085	1,42618404488104	170.085	0.47025	0.327671	0.9999	+	ENSG00000227811.3
INSIG1-DT	chr7:155288608-155297724	TKS4_WT	TKS4_KO	2069.54	2201.48	1.06375	0,0885321953438223	6.37502	0.908	0.0419142	0.9999	-	ENSG00000273117.1
INTS6-AS1	chr13:51453344-51454716	TKS4_WT	TKS4_KO	977.454	944.569	0.96636	-0,0506951112251115	-3.36401	0.94825	0.0230771	0.9999	+	ENSG00000236778.8
IPO9-AS1	chr1:201648321-201884291	TKS4_WT	TKS4_KO	146.815	22.1427	0.151398	-2,73238884913465	-84.8602	0.33435	0.475799	0.9999	-	ENSG00000231871.5
IPW	chr15:24823607-25439381	TKS4_WT	TKS4_KO	82.439	22.1427	0.269481	-1,90738994278486	-73.0519	1	0	1
IQCH-AS1	chr15:67200666-67530146	TKS4_WT	TKS4_KO	6382.9	4987.2	0.781341	-0,356179065034446	-21.8659	0.7371	0.132474	0.9999	-	ENSG00000259673.6
IRAG1-AS1	chr11:10541235-10693755	TKS4_WT	TKS4_KO	551.134	639.824	1.16089	0,212882130953465	16.0894	0.89395	0.0486868	0.9999	+	ENSG00000177112.9
IRAIN	chr15:98645862-98964530	TKS4_WT	TKS4_KO	785.867	1012.72	1.28863	0,364186088557005	28.8629	0.83515	0.0782355	0.9999	-	ENSG00000259424.2
IRF1-AS1	chr5:132410928-132476044	TKS4_WT	TKS4_KO	211.191	778.188	3.68349	1,87494064697065	268.349	0.2466	0.608007	0.9999	+	ENSG00000197536.11
IRX4-AS1	chr5:1877412-1887179	TKS4_WT	TKS4_KO	3173.43	2728.76	0.859882	-0,218199183871671	-14.0118	0.9176	0.0373466	0.9999	+	ENSG00000249116.2
ISM1-AS1	chr20:13008971-13638932	TKS4_WT	TKS4_KO	270.859	132.856	0.490687	-1,0319097057279	-50.9313	0.64025	0.19365	0.9999	-	ENSG00000226263.1
ITFG2-AS1	chr12:2740074-2889524	TKS4_WT	TKS4_KO	156.232	710.144	4.54318	2,17541987277616	354.318	0.3076	0.512014	0.9999	-	ENSG00000258325.2
ITGA6-AS1	chr2:172427335-172506459	TKS4_WT	TKS4_KO	0	46.6719	467.719	5,54757013097586	46671.9	1	0	1	-	ENSG00000232788.1
ITGA9-AS1	chr3:37452140-37861780	TKS4_WT	TKS4_KO	96.564	97.1084	1.00563	-0,0052679222164216	0.563188	1	0	1
ITGB1-DT	chr10:32958458-33116807	TKS4_WT	TKS4_KO	2277.56	3375.36	1.48199	0,566961762041425	48.1986	0.4494	0.347367	0.9999	+	ENSG00000229656.8
ITGB2-AS1	chr21:44885948-44929680	TKS4_WT	TKS4_KO	59.6677	23.336	0.392118	-1,37220226269947	-60.7882	0.2541	0.594995	0.9999	+	ENSG00000227039.7
ITGB8-AS1	chr7:20328300-20415754	TKS4_WT	TKS4_KO	600.615	269.53	0.448848	-1,1578595131488	-55.1152	0.51135	0.291282	0.9999	-	ENSG00000271133.6
ITPK1-AS1	chr14:92936913-93115925	TKS4_WT	TKS4_KO	64.376	89.7641	1.39376	0,458983776344724	39.376	1	0	1	+	ENSG00000258730.1
ITPKB-IT1	chr1:226631689-226739296	TKS4_WT	TKS4_KO	193.128	23.336	0.121287	-3,05020995962073	-87.8713	1	0	1	-	ENSG00000228382.2
ITPR1-DT	chr3:4490316-4493163	TKS4_WT	TKS4_KO	32.188	23.336	0.725842	-0,501935336213069	-27.4158	1	0	1	-	ENSG00000231249.2
ITPRIP-AS1	chr10:104309699-104338465	TKS4_WT	TKS4_KO	32.188	138.823	4.30262	2,06555187434615	330.262	1	0	1	+	ENSG00000228261.1
JMJD1C-AS1	chr10:63167220-63625128	TKS4_WT	TKS4_KO	2345.87	2508.53	1.06934	0,0961617731304703	6.93359	0.9482	0.0231	0.9999	+	ENSG00000272767.1
JPX	chrX:73944323-74293574	TKS4_WT	TKS4_KO	1008.87	1076.78	1.06731	0,0926879073563161	6.73063	0.9631	0.0163286	0.9999
KANSL1-AS1	chr17:45843355-46225374	TKS4_WT	TKS4_KO	499.343	282.255	0.56534	-0,825407265293519	-43.466	0.77395	0.111287	0.9999	+	ENSG00000214401.5
KANSL1L-AS1	chr2:210002564-210171409	TKS4_WT	TKS4_KO	1377.06	1392.03	1.01087	0,0146552357611907	1.08702	0.99315	0.00298515	0.9999	+	ENSG00000229127.2
KBTBD11-OT1	chr8:1970717-2006943	TKS4_WT	TKS4_KO	13259.5	19905	1.50118	0,586002944623425	50.1184	0.31825	0.497232	0.9999
KCNH1-IT1	chr1:210678313-211134148	TKS4_WT	TKS4_KO	32.188	0	0.00309713	-8,37451788104629	-99.6903	1	0	1	-	ENSG00000234233.1
KCNIP2-AS1	chr10:101819067-101843920	TKS4_WT	TKS4_KO	114.627	139.245	1.21458	0,269182916213714	21.4579	0.872	0.0594835	0.9999	+	ENSG00000226009.2
KCNIP4-IT1	chr4:20696281-21948772	TKS4_WT	TKS4_KO	0	23.336	234.36	4,55065444994586	23336	1	0	1	-	ENSG00000280650.1
KCNMB2-AS1	chr3:178525466-178860405	TKS4_WT	TKS4_KO	1811.26	2063.36	1.13918	0,187275522336851	13.9177	0.80725	0.0929919	0.9999	-	ENSG00000237978.6
KCNQ1OT1	chr11:2445007-2861569	TKS4_WT	TKS4_KO	86738.5	91609.9	1.05616	0,0788159622111109	5.61618	0.9024	0.0446009	0.9999	-	ENSG00000269821.1
KCNQ2-AS1	chr20:63400207-63472655	TKS4_WT	TKS4_KO	128.752	157.386	1.22222	0,279466806867876	22.2224	1	0	1	+	ENSG00000226390.1
KCTD21-AS1	chr11:78139792-78188626	TKS4_WT	TKS4_KO	114.627	262.609	2.28986	1,18398730565868	128.986	0.6088	0.215525	0.9999	+	ENSG00000246174.9
KDM2B-DT	chr12:121400095-121596184	TKS4_WT	TKS4_KO	32.188	23.336	0.725842	-0,501935336213069	-27.4158	1	0	1	+	ENSG00000256742.1
KDM4A-AS1	chr1:43650148-43707341	TKS4_WT	TKS4_KO	303.047	672.89	2.22001	1,14629071322521	122.001	0.5443	0.264162	0.9999	-	ENSG00000236200.7
KDM7A-DT	chr7:140177260-140179640	TKS4_WT	TKS4_KO	376.839	772.073	2.04854	1,031152487189	104.854	0.3973	0.400881	0.9999	+	ENSG00000260231.2
KIAA1614-AS1	chr1:180912896-180954887	TKS4_WT	TKS4_KO	1589.03	1948.59	1.22626	0,293450617234834	22.6262	0.8102	0.0914078	0.9999	-	ENSG00000232586.1
KIAA2012-AS1	chr2:202073254-202238597	TKS4_WT	TKS4_KO	128.752	0	0.000776084	-10,3415410611477	-99.9224	0.12235	0.912396	0.9999	-	ENSG00000222035.4
KIF5C-AS1	chr2:148875226-149026759	TKS4_WT	TKS4_KO	243.379	564.307	2.31809	1,20761556425118	131.809	0.45525	0.34175	0.9999	-	ENSG00000231079.7
KIF9-AS1	chr3:47164369-47282847	TKS4_WT	TKS4_KO	1285.98	1247.59	0.97015	-0,0447301059452776	-2.98504	0.9815	0.0081097	0.9999	+	ENSG00000227398.5
KIRREL1-IT1	chr1:157993612-158100262	TKS4_WT	TKS4_KO	670.469	821.373	1.22504	0,290892362096887	22.5039	0.87165	0.0596579	0.9999	+	ENSG00000226520.1
KLC4-AS1	chr6:43054028-43076230	TKS4_WT	TKS4_KO	82.439	225.668	2.73529	1,43604724262542	173.529	0.511	0.291579	0.9999	-	ENSG00000272170.1
KLF3-AS1	chr4:38612700-38701517	TKS4_WT	TKS4_KO	380.777	898.245	2.35862	1,23453941253737	135.862	0.48775	0.311803	0.9999	-	ENSG00000231160.11
[truncated: 1,331 more rows]

## Sheet: Supplementary Table S4
Name	Provider	Amplicon Length	Catalog no.	Organism
[truncated: 35 more rows]
